# Supplementary material for: The role of scaffold reshaping and disassembly in dynamin driven membrane fission
Source: eLife journal article supplement (doi:10.7554/elife.39441), 2018-12-18
Supplement: supp [file elife-39441-supp-v1.zip]

Archive with 20 entries (20 files):
- elife_poa_e39441_Video_4.mp4
- elife_poa_e39441_Figure_2_figure_supplement_1_source_data_4.txt
- elife_poa_e39441_Figure_2_figure_supplement_1_source_data_3.txt
- elife_poa_e39441_Video_2.mp4
- elife_poa_e39441_Transparent_Reporting_File.docx
- elife_poa_e39441_Video_1.mp4
- elife_poa_e39441_Figure_2_source_data_2.txt
- elife_poa_e39441_Figure_2_figure_supplement_1.pdf
- elife_poa_e39441_Figure_6_source_data_1.txt
- elife_poa_e39441_Figure_2_figure_supplement_1_source_data_2.txt
- elife_poa_e39441_Figure_2_figure_supplement_1_source_data_1.txt
- elife_poa_e39441_Figure_2_source_data_4.txt
- elife_poa_e39441_Figure_2_source_data_3.txt
- elife_poa_e39441_Figure_2_source_data_1.txt
- elife_poa_e39441_Video_6.mp4
- elife_poa_e39441_Figure_3_source_data_1.txt
- elife_poa_e39441_Video_5.mp4
- elife_poa_e39441_Figure_6_source_data_2.txt
- elife_poa_e39441_Figure_6_source_data_3.txt
- elife_poa_e39441_Video_3.mp4
