# Supplementary material for: The role of scaffold reshaping and disassembly in dynamin driven membrane fission
Source: eLife journal article supplement (doi:10.7554/elife.39441), 2018-12-18
Supplement: supp [file elife-39441-supp-v1.zip › elife_poa_e39441_Figure_2_figure_supplement_1_source_data_1.txt]

#  DATA FILE for Fig. 2f, SUPPLEMENT Fig 1 in the paper
#
#      "The role of scaffold reshaping and disassembly
#       in dynamin driven membrane fission"
#
#  by Martina Pannuzzo, Zachary A. McDargh, and Markus Deserno
#
#  published in eLife
#
#  -------------------------------------------------------------
#  Fission driven by CONSTRICTION and ELONGATION
#  -------------------------------------------------------------
#  
#  Column 1: R  (scaffold radius, in units of sigma)
#  Column 2: Rg (gyration radius of neck, in units of sigma; run 1)
#  Column 3: Rg (gyration radius of neck, in units of sigma; run 2)
#  Column 4: Rg (gyration radius of neck, in units of sigma; run 3)
#  
12.267479 5.078 5.735 5.832
11.330466 5.078 5.735 5.704
11.32767 4.974 5.803 5.951
11.361816 5.05 5.751 5.708
11.377818 4.852 5.794 5.865
11.407171 4.779 5.816 5.859
11.394427 4.77 5.795 5.734
11.450542 4.516 5.626 5.566
11.35953 4.677 5.875 5.491
11.462662 4.809 5.847 5.415
11.441612 4.806 5.703 5.395
11.334818 4.935 5.627 5.384
11.394909 5.112 5.52 5.203
11.287395 4.803 5.514 5.228
11.293473 4.75 5.219 5.082
11.349083 4.854 5.053 5.207
11.40535 5.021 5.254 5.294
11.406178 4.985 5.413 5.129
11.433041 4.992 5.284 5.318
11.478549 5.146 5.395 5.312
11.461007 4.803 5.387 5.194
11.348223 5.022 5.397 5.186
11.384845 4.952 5.176 5.15
11.266851 4.953 5.259 5.268
11.246872 4.929 5.066 5.112
11.215383 4.9 5.194 5.07
11.178205 4.815 4.888 5.173
11.307889 4.789 4.939 5.011
11.276185 4.887 4.817 4.992
11.254773 5.076 4.932 4.896
11.326557 5.126 4.717 4.922
11.376735 5.11 4.985 5.125
11.378402 4.996 4.822 5.186
11.351115 5.017 4.866 5.177
11.376307 4.863 4.861 4.98
11.36552 4.879 4.661 5.178
11.380183 4.903 4.704 5.128
11.335354 4.848 4.839 5.025
11.367751 5.11 4.936 5.245
11.264232 4.998 4.785 5.413
11.408261 4.921 4.819 5.648
11.341632 4.824 4.79 5.504
11.34173 4.68 4.864 5.584
11.473891 4.559 4.875 5.26
11.348716 4.61 4.939 5.274
11.354226 4.696 4.853 5.194
11.363061 4.692 4.861 5.234
11.34013 4.636 4.921 5.122
11.26344 4.779 4.994 5.194
11.329908 4.555 4.91 5.093
11.399452 4.767 5.045 5.057
11.367634 4.772 5.043 5.006
11.335072 4.817 4.888 5.015
11.346711 4.819 4.834 5.089
11.386385 4.876 4.946 5.118
11.382001 4.821 4.868 4.979
11.383061 4.917 4.932 4.984
11.326797 4.862 4.788 5.02
11.332789 4.975 4.719 5.157
11.381738 4.907 4.666 5.135
11.367687 4.848 4.665 5.179
11.336793 4.686 4.829 5.281
11.312145 4.791 4.866 5.186
11.386877 4.955 5.046 5.214
11.466481 4.874 5.043 5.116
11.438545 4.845 5.165 5.42
11.446392 5.027 5.146 5.244
11.462835 4.954 5.194 5.25
11.353546 4.914 5.077 5.456
11.38459 4.945 5.062 5.386
11.464354 5.159 5.153 5.421
11.500088 5.039 4.971 5.181
11.478508 5.086 5.06 5.187
11.537302 4.914 5.279 5.18
11.53745 4.867 4.969 5.266
11.561532 4.82 4.948 5.301
11.490677 4.97 4.841 5.196
11.527458 5.061 4.921 5.093
11.560179 4.886 5.064 5.124
11.431248 4.881 4.91 5.135
11.57904 4.843 4.96 5.25
11.382722 4.813 4.895 5.036
11.433432 4.929 5.073 5.087
11.317151 5.042 4.914 5.299
11.268374 5.008 4.947 5.338
11.241865 4.817 4.833 5.261
11.132843 4.652 4.78 5.193
11.381185 4.672 4.835 5.102
11.323867 4.592 4.901 5.113
11.360056 4.599 4.903 5.137
11.185725 4.542 4.907 5.249
11.203788 4.656 4.687 5.315
11.247956 4.635 4.653 5.165
11.40322 4.33 4.879 5.112
11.337331 4.421 4.81 4.971
11.363555 4.622 4.812 5.063
11.43211 4.649 4.806 5.075
11.430766 4.534 4.946 5.103
11.338354 4.591 4.808 5.082
11.334062 4.692 4.886 5.081
11.321435 4.719 4.983 4.849
11.387981 4.701 4.942 5.044
11.391558 4.76 4.834 5.03
11.425871 4.773 4.942 5.026
11.565321 4.867 5.024 4.995
11.42431 4.599 5.19 5.134
11.388554 4.794 5.043 4.933
11.433109 4.69 5.054 4.904
11.310802 4.637 5.09 5.142
11.365369 4.814 5.129 5.036
11.337513 4.958 4.968 4.834
11.357145 4.761 4.811 4.984
11.358193 4.682 4.956 5.193
11.342112 4.64 5 5.234
11.318849 4.748 5.009 5.18
11.305013 4.947 5.038 5.102
11.166251 4.873 4.882 5.031
11.280704 4.852 4.835 5.146
11.329369 4.983 4.687 5.19
11.345224 4.963 4.694 5.335
11.267837 4.763 4.885 5.26
11.383034 4.816 4.971 5.45
11.358339 4.885 4.827 5.373
11.37877 4.794 4.828 5.32
11.410411 4.917 4.762 5.291
11.456874 5.02 4.863 5.406
11.38422 4.875 4.869 5.448
11.364465 4.767 4.684 5.313
11.126793 4.992 4.929 5.213
11.315104 5.031 5.073 5.121
11.298937 5.203 5.031 5.078
11.425333 5.184 5.114 5.232
11.352697 5.199 5.207 5.45
11.448035 5.096 5.063 5.326
11.365841 5.135 4.962 5.218
11.382874 5.252 5.063 5.143
11.393726 5.112 5.162 5.16
11.348613 5.089 5.253 5.024
11.275031 5.291 5.436 5.059
11.353238 5.307 5.225 5.353
11.260123 5.188 5.232 5.216
11.318218 5.228 5.281 5.099
11.348302 5.257 5.388 5.172
11.375225 5.394 5.301 4.988
11.365137 5.18 5.311 5.24
11.306546 5.072 5.365 5.235
11.3479 5.064 5.387 5.172
11.318082 4.825 5.386 5.044
11.418724 5.05 5.281 5.057
11.448563 5.081 5.184 4.888
11.490706 5.014 5.212 4.948
11.549229 5.227 5.21 4.958
11.456818 5.328 5.146 5.151
11.393522 5.354 5.27 4.932
11.379103 5.354 5.212 5.264
11.351913 5.361 5.244 5.241
11.311994 5.25 5.201 5.279
11.37641 5.165 5.246 5.201
11.406631 5.134 5.214 5.32
11.330729 5.298 5.076 5.287
11.302488 5.255 5.078 5.246
11.332888 5.245 5.259 5.247
11.332742 5.039 5.095 5.038
11.244367 5.077 5.089 5.003
11.390307 5.19 4.883 5.23
11.37805 5.239 5.057 5.042
11.346294 5.024 5.083 5.019
11.408984 5.113 5.034 4.954
11.386175 5.209 4.974 5.104
11.347413 5.086 5.202 5.069
11.24832 5.119 5.219 4.571
11.364276 5.309 5.203 4.662
11.430985 5.042 5.206 4.611
11.408055 5.229 5.231 4.48
11.458535 5.193 5.409 4.68
11.465038 5.312 5.548 4.643
11.364441 5.034 5.366 4.789
11.368968 5.139 5.273 4.85
11.420132 5.279 5.116 4.513
11.491351 5.246 5.23 4.526
11.416558 5.176 5.354 4.527
11.456287 5.084 5.379 4.486
11.381064 5.051 5.414 4.442
11.379393 5.042 5.451 4.218
11.404605 5.061 5.491 4.356
11.402662 5.036 5.364 4.364
11.454174 5.118 5.391 4.265
11.492519 5.135 5.4 4.309
11.421687 4.869 5.469 4.459
11.382843 4.934 5.242 4.529
11.301229 4.98 5.491 4.607
11.321583 4.936 5.353 4.34
11.357108 5.165 5.18 4.346
11.403593 5.042 5.266 4.29
11.482814 5.11 5.049 4.276
11.380505 5.136 5.029 4.214
11.412664 5.154 5.091 4.274
11.488657 5.052 5.007 4.424
11.502039 5.16 5.315 4.572
11.374596 4.899 5.358 4.63
11.358936 4.948 5.227 4.771
11.444945 5.04 5.22 4.928
11.422013 5.047 5.433 5.048
11.504143 4.992 5.386 5.093
11.385181 4.881 5.224 5.298
11.644003 4.906 5.097 5.513
11.459651 4.82 5.192 5.212
11.543944 4.71 5.217 5.145
11.358401 4.937 5.062 5.134
11.499425 4.805 5.053 5.081
11.544709 4.921 4.951 5.198
11.580928 4.912 5.047 5.081
11.425013 4.709 5.062 4.936
11.41214 4.916 5.08 4.887
11.294189 4.881 5.252 5.024
11.44273 4.81 5.241 5.134
11.470696 4.521 4.995 5.135
11.494692 4.575 5.069 5.121
11.450159 4.682 5.136 5.179
11.44404 4.75 5.024 5.07
11.361881 5.017 5.136 4.963
11.305298 5.045 5.152 5.066
11.314803 4.992 4.834 5.012
11.362728 5.007 5.176 4.928
11.377948 5.026 5.015 4.907
11.271655 5.084 4.826 4.893
11.307859 4.978 4.861 5.165
11.473591 5.023 4.773 5.151
11.487171 4.853 4.827 5.137
11.482908 4.81 4.742 5.048
11.402555 4.914 4.558 4.935
11.45234 4.949 4.648 4.896
11.434001 4.841 4.779 4.99
11.323749 4.852 4.78 4.935
11.398672 4.682 4.971 5.066
11.390204 5.047 4.842 4.972
11.399382 4.765 4.796 4.927
11.35851 4.87 4.839 4.757
11.304117 4.781 4.95 4.869
11.322791 4.762 4.906 4.703
11.341397 4.878 5.099 4.987
11.319504 4.792 5.131 5.002
11.395494 4.81 5.125 5.083
11.402385 4.905 4.825 4.84
11.465322 5.14 4.894 4.893
11.406372 5.128 4.909 4.954
11.411906 5.052 4.858 4.844
11.368664 5.185 4.8 4.749
11.386309 5.095 4.803 4.946
11.299199 5.132 4.928 4.813
11.366783 5.162 4.899 4.94
11.421695 5.126 4.954 4.933
11.385919 5.366 5.125 4.995
11.458888 5.234 5.066 4.854
11.476245 5.199 4.971 4.89
11.459839 5.313 5.023 4.96
11.440643 5.267 4.976 4.911
11.37954 5.338 4.908 5.004
11.407601 5.324 5.048 4.826
11.247243 5.243 5.05 4.959
11.285276 5.36 5.145 5.025
11.363815 5.149 5.105 5.022
11.31227 5.177 5.031 5.108
11.301222 5.16 5.227 5.223
11.30976 5.175 5.02 5.235
11.336217 5.1 4.902 5.08
11.412444 4.854 4.932 5.146
11.42888 4.732 4.772 5.202
11.371561 4.588 4.837 5.199
11.491797 4.752 5.042 5.246
11.457675 4.691 4.976 5.421
11.46613 4.701 5.051 5.409
11.352755 4.777 4.981 5.307
11.362527 4.691 4.932 5.388
11.491504 4.58 4.833 5.308
11.600581 4.664 4.867 5.201
11.57091 4.843 4.943 5.129
11.565417 4.931 5.058 5.463
11.571858 4.885 4.982 5.077
11.506882 5.209 4.963 5.153
11.490531 5.046 4.762 5.117
11.542441 4.956 4.776 5.2
11.531946 5.015 4.941 5.185
11.50929 5.155 4.985 5.017
11.436698 5.124 4.876 5.083
11.413941 5.046 5.074 4.929
11.361571 4.87 5.097 5.144
11.355248 4.963 4.891 5.076
11.353733 4.842 5.061 5.104
11.391002 4.958 5.063 5.037
11.32409 4.831 5.008 5.149
11.24664 4.688 5.166 5.088
11.403824 4.884 5.115 5.175
11.312353 4.725 5.287 5.16
11.306879 4.898 5.178 5.272
11.311281 4.925 5.108 5.073
11.273297 5.009 5.328 4.9
11.330474 4.963 5.031 5.016
11.317829 4.931 4.967 4.951
11.262852 5.22 5.074 5.094
11.337667 4.982 5.205 5.095
10.815521 5.222 5.163 
10.786437 5.141 5.197 4.915
10.852978 4.99 5.26 4.956
10.839717 5.039 5.104 5.035
10.899225 4.841 5.027 5.047
10.783341 4.766 4.917 4.824
10.841764 4.822 4.812 4.747
10.757588 4.618 4.671 4.853
10.757825 4.585 5.116 4.892
10.850212 4.536 5.081 5.04
10.909495 4.6 5.026 5.077
10.874095 4.593 5.111 4.87
10.833422 4.739 5.108 4.85
10.871042 4.735 4.996 4.754
10.912288 4.683 5.041 4.941
10.848154 4.736 5.096 4.966
10.791106 4.722 4.986 4.769
10.853275 4.789 5.087 4.776
10.873802 4.786 4.966 4.772
10.827606 4.583 5.028 4.734
10.856329 4.873 5.033 4.826
10.832176 5.093 5.208 4.74
10.834716 4.9 5.139 4.684
10.916759 4.961 4.969 4.567
10.838689 4.914 5.081 4.833
10.853054 4.827 5.004 4.799
10.796133 4.715 5.094 4.817
10.87171 4.566 5.322 4.791
10.867446 4.688 5.278 4.708
10.799415 4.591 5.102 4.825
10.980174 4.708 5.129 5.087
10.890478 4.813 4.954 4.811
10.889487 4.827 5.005 4.745
10.862127 4.879 5.019 4.652
10.807089 4.8 5.037 4.727
10.833809 4.846 5.031 4.89
10.790889 4.885 5.077 4.935
10.870643 4.714 4.947 5.056
10.774527 4.875 4.982 4.961
10.846667 4.857 4.86 4.838
10.791286 4.873 4.903 4.816
10.855466 5.016 5.061 4.812
10.875548 5.065 5.073 4.911
10.860866 5.005 4.956 4.681
10.805587 4.95 5.211 4.494
10.851229 4.895 4.979 4.705
10.89029 4.738 5.03 4.638
10.890166 4.785 5.149 4.685
10.830489 4.86 4.79 4.895
10.805292 5.004 4.811 4.809
10.872749 4.926 4.91 4.741
10.905017 4.956 4.888 4.867
10.918177 4.968 4.675 4.767
10.862668 4.826 4.945 4.799
10.85114 4.891 4.843 4.513
10.877295 4.795 4.722 4.799
10.861344 4.831 4.917 4.678
10.831171 4.703 4.784 4.675
10.838356 4.971 4.817 4.617
10.909719 4.7 4.723 4.578
10.83837 4.928 4.898 4.964
10.864718 4.779 4.701 4.625
10.704847 5.018 4.754 4.437
10.863211 4.872 4.756 4.646
10.858504 5.029 4.902 4.607
10.907444 4.969 4.891 4.488
10.779629 5.062 4.917 5.071
10.828937 4.937 4.816 4.49
10.88403 5.118 4.762 4.578
10.837526 5.314 4.782 4.6
10.857223 5.141 4.823 4.544
10.783563 5.022 4.788 4.585
10.769233 5.302 4.693 4.676
10.801878 5.258 4.776 4.687
10.799129 5.168 4.649 4.587
10.873051 5.359 4.756 4.775
10.831319 5.491 4.53 4.673
10.876052 5.304 4.802 4.546
10.948582 5.536 4.807 4.442
10.946786 5.503 4.685 4.592
10.928022 5.355 4.671 4.492
10.93579 5.475 4.499 4.461
10.980315 5.371 4.639 4.514
10.89256 4.905 4.624 4.613
10.837643 4.862 4.425 4.463
10.913568 5.113 4.409 4.579
10.840824 5.144 4.538 4.751
10.820994 5.248 4.592 4.681
10.87895 5.229 4.59 4.739
10.904462 5.427 4.568 4.701
10.802522 5.347 4.505 4.639
10.891083 5.423 4.638 4.564
10.816387 5.157 4.646 4.533
10.73245 5.305 4.672 4.599
10.830923 5.352 4.652 4.63
10.8481 5.203 4.736 4.392
10.76254 5.132 4.774 4.515
10.896407 5.231 4.721 4.404
10.816656 5.445 4.619 4.32
10.77692 5.198 4.674 4.337
10.820382 5.193 4.743 4.366
10.765011 5.028 4.627 4.419
10.795828 5.081 4.736 4.525
10.780535 5.223 4.768 4.39
10.721818 5.082 4.817 4.563
10.773434 5.047 4.809 4.391
10.771095 4.958 4.909 4.48
10.751486 5.034 4.842 4.687
10.773379 4.863 4.76 4.585
10.82462 4.693 4.551 4.666
10.811939 4.999 4.719 4.512
10.795956 4.921 4.671 4.485
10.810878 4.928 4.717 4.417
10.788584 4.901 4.842 4.339
10.849462 4.942 4.873 4.573
10.85272 5.058 4.734 4.406
10.834091 4.803 4.86 4.501
10.831236 4.875 4.859 4.528
10.85915 4.94 4.823 4.692
10.801144 5.29 4.897 4.656
10.829173 5.272 4.773 4.515
10.894105 5.145 4.882 4.496
10.905781 5.152 5.219 4.541
10.860122 5.157 4.846 4.419
10.752928 4.956 4.961 4.278
10.840998 5.01 5.054 4.466
10.895696 4.964 4.926 4.901
10.898818 5.095 4.969 4.57
10.891872 5.082 4.926 4.513
10.877349 4.895 4.898 4.433
10.760754 4.926 4.812 4.512
10.81001 5.056 4.676 4.502
10.783395 5.012 4.832 4.472
10.870947 5.222 4.604 4.62
10.839598 5.006 4.674 4.58
10.812831 4.789 4.57 4.66
10.826672 4.799 4.611 4.79
10.903864 5.017 4.745 4.729
10.91159 4.722 4.747 4.739
10.756368 4.768 4.898 4.865
10.832109 5.05 4.695 4.862
10.898913 4.864 4.846 4.804
10.859585 4.757 4.814 4.852
10.873876 4.924 4.731 5.009
10.858797 4.973 4.691 5.057
10.897045 5.199 4.599 5.024
10.874296 5.196 4.589 4.81
10.869694 5.165 4.537 4.679
10.917759 5.055 4.576 4.652
10.783985 5.107 4.617 4.698
10.91277 5.125 4.664 4.727
10.927249 4.994 4.561 4.887
10.810398 5.042 4.507 4.93
10.815866 5.122 4.712 4.835
10.811554 5.032 4.613 4.923
10.772031 5.046 4.348 4.908
10.806628 5.094 4.441 4.961
10.773749 5.133 4.459 4.819
10.836773 5.174 4.443 5.075
10.818054 4.75 4.654 4.818
10.851332 4.978 4.656 4.98
10.902768 4.956 4.561 4.991
10.893771 4.844 4.658 4.899
10.938537 4.934 4.586 4.797
10.984396 4.874 4.613 4.896
10.983046 5.272 4.574 4.851
10.890614 5.352 4.698 4.795
10.825232 5.206 4.714 4.951
10.835425 5.29 4.729 5.08
10.833957 5.162 4.632 4.887
10.861473 5.19 4.581 4.94
10.838314 5.184 4.495 4.8
10.855899 5.089 4.592 4.65
10.919681 4.908 4.519 4.808
10.861997 4.905 4.489 4.767
10.889799 4.987 4.382 4.69
10.811645 4.944 4.266 4.495
10.844022 5.009 4.492 4.607
10.756234 5.068 4.44 4.516
10.853716 5.155 4.344 4.643
10.858412 5.046 4.419 4.65
10.858275 4.926 4.482 4.861
10.897853 4.872 4.447 4.77
10.862046 5.145 4.375 4.641
10.837261 4.995 4.527 4.565
11.044711 4.988 4.584 4.737
10.995489 5.063 4.548 4.808
10.922972 5.086 4.519 4.869
10.907936 5.084 4.47 4.761
10.860099 4.962 4.591 4.979
10.90754 4.911 4.611 4.837
10.821056 5.073 4.571 4.844
10.789559 5.164 4.474 4.843
10.902317 4.922 4.549 4.757
10.811974 4.877 4.758 4.767
10.840348 5.031 4.647 4.721
10.80613 5.205 4.599 4.869
10.828554 4.982 4.649 5.034
10.788945 4.901 4.542 4.832
10.845489 4.974 4.658 4.929
10.888697 5.024 4.712 4.85
10.784396 5.123 4.818 4.87
10.770791 5.066 4.988 4.703
10.751768 4.96 4.8 4.839
10.78986 5.001 4.886 4.777
10.846265 5.072 5.151 4.768
10.862578 5.159 5.055 4.775
10.883528 5.267 5.171 4.553
10.902559 5.118 5.111 4.642
10.849872 5.165 5.127 4.501
10.941969 5.219 5.178 4.686
10.909113 5.138 5.204 4.651
10.964074 5.097 5.14 4.539
11.004158 4.967 5.139 4.509
10.924947 4.991 5.204 4.764
10.798168 5.135 5.047 4.724
10.960675 5.162 4.935 4.819
10.859543 5.095 4.972 4.651
10.79802 5.055 5.151 4.872
10.901918 4.948 5.065 4.805
10.794292 4.994 4.953 4.83
10.843026 5.238 4.912 4.883
10.829918 5.14 5.074 5.072
10.882482 5.196 4.861 4.906
10.884656 5.194 4.984 4.774
10.900616 5.27 4.976 4.866
10.969513 5.25 5.023 4.762
11.002709 5.203 4.995 4.828
10.877132 5.156 5.007 4.983
10.777264 5.267 5.08 4.929
10.926498 5.195 4.965 4.68
10.858369 5.258 5.042 4.901
10.838719 5.225 4.973 4.639
10.851368 5.333 5.116 4.71
10.843928 5.385 5.087 4.534
10.893234 5.136 5.135 4.646
10.800074 5.342 4.999 4.669
10.858162 5.112 4.964 4.651
10.908375 5.166 5.123 4.707
10.893065 5.008 4.925 4.451
10.923694 4.934 4.794 4.575
10.977477 5.107 4.863 4.771
10.903897 4.982 4.703 4.628
10.981397 4.971 4.721 4.771
10.890841 4.972 4.833 4.686
10.866793 4.865 4.786 4.775
10.842115 5.036 4.628 4.638
10.89966 4.98 4.631 4.753
10.884281 5.02 4.718 4.745
10.935132 5.139 4.703 4.791
10.884329 5.266 4.658 4.878
10.95532 5.284 4.523 4.842
10.89388 5.19 4.581 4.727
10.945938 5.078 4.706 4.624
10.926322 4.999 4.707 4.563
10.924858 5.069 4.843 4.447
10.937595 4.801 4.636 4.475
10.855065 4.954 4.808 4.49
10.836417 4.809 4.739 4.703
10.872414 4.721 4.821 4.529
10.94108 4.589 4.746 4.409
10.837044 4.794 4.609 4.556
10.947698 4.693 4.648 4.532
10.984558 4.761 4.652 4.554
10.96593 4.713 4.582 4.594
10.942767 4.831 4.723 4.577
10.87719 4.813 4.462 4.821
10.941636 5.019 4.61 4.781
10.880859 5.03 4.763 4.815
10.867193 4.93 5.059 4.894
10.815915 4.78 4.884 4.902
10.849525 4.806 4.995 4.715
10.874209 4.769 4.793 4.844
10.947239 4.684 5.039 4.61
10.961069 4.572 4.99 4.697
10.93265 4.774 5.251 4.638
10.828252 4.889 5.101 4.641
10.91353 4.546 5.097 4.698
10.968447 4.542 5.123 4.527
10.828659 4.642 5.113 4.676
10.927249 4.521 5.141 4.901
10.87361 4.398 5.138 4.652
10.797693 4.525 5.188 4.708
10.813132 4.605 5.07 4.503
10.784792 4.504 5.332 4.41
10.715279 4.575 5.164 4.477
10.821279 4.487 5.196 4.543
10.890169 4.367 5.186 4.545
10.781694 4.476 5.19 4.356
10.85183 4.466 5.472 4.259
10.782866 4.397 5.29 4.472
10.782366 4.489 5.338 4.623
10.859195 4.556 5.322 4.761
10.913732 4.662 5.225 4.768
10.92199 4.622 5.129 4.836
10.810404 4.589 4.92 4.833
10.774918 4.48 4.937 4.864
10.914405 4.544 5.2 5.335
10.81643 4.62 4.989 4.847
10.882719 4.594 4.995 4.809
10.34069 4.705 5.14 5.031
10.34069 4.612 5.094 4.384
10.392847 4.781 5.044 4.562
10.345026 4.741 5.176 4.512
10.401282 4.789 5.126 4.489
10.394542 4.819 5.028 4.421
10.409012 4.741 5.116 4.413
10.404871 4.688 5.031 4.401
10.446203 4.578 5.11 4.458
10.366153 4.815 4.933 4.675
10.383918 4.783 5.045 4.595
10.415075 4.709 5 4.482
10.313724 4.894 5.011 4.554
10.315568 4.988 4.788 4.628
10.305895 5.032 4.96 4.585
10.451742 5.093 4.906 4.485
10.465108 5.078 5.019 4.532
10.379078 4.777 5.219 4.557
10.427219 4.811 5.042 4.404
10.378242 4.977 5.101 4.477
10.384858 4.93 5.264 4.413
10.410927 4.791 4.973 4.418
10.471193 4.861 5.001 4.317
10.427276 4.709 4.933 4.432
10.433315 4.668 4.917 4.394
10.332394 4.772 4.748 4.327
10.393133 4.707 4.792 4.35
10.383862 4.739 4.743 4.431
10.355717 4.664 5.041 4.327
10.300901 4.546 4.791 4.437
10.399904 4.689 4.836 4.368
10.451871 4.662 4.958 4.472
10.470007 4.562 4.803 4.535
10.415712 4.541 4.785 4.461
10.37487 4.449 4.85 4.245
10.533321 4.46 4.778 4.289
10.468037 4.384 4.808 4.106
10.461996 4.398 4.877 4.338
10.474588 4.156 4.778 4.215
10.559112 4.563 4.779 4.147
10.590423 4.508 4.788 4.755
10.523105 4.408 4.91 4.362
10.501843 4.336 4.864 4.434
10.460823 4.313 4.691 4.283
10.604005 4.449 4.63 4.321
10.457102 4.409 4.683 4.248
10.524155 4.247 4.652 4.238
10.534127 4.162 4.633 4.375
10.527455 4.161 4.64 4.837
10.521822 4.224 4.693 4.461
10.593238 4.274 4.547 4.519
10.442707 4.342 4.734 4.521
10.510694 4.443 4.714 4.506
10.433881 4.407 4.595 4.419
10.495164 4.418 4.533 4.435
10.406664 4.412 4.69 4.581
10.540346 4.385 4.555 4.562
10.542168 4.329 4.492 4.728
10.458676 4.229 4.324 4.717
10.426265 4.251 4.598 4.629
10.522217 4.445 4.608 4.527
10.489652 4.223 4.502 4.47
10.371506 4.425 4.437 4.407
10.390553 4.332 4.361 4.445
10.494463 4.336 4.45 4.594
10.455097 4.298 4.513 4.743
10.391291 4.291 4.589 4.649
10.350965 4.465 4.377 4.544
10.293929 4.299 4.555 4.384
10.275089 4.431 4.365 4.75
10.380627 4.495 4.39 4.705
10.543722 4.64 4.451 4.542
10.545409 4.498 4.699 4.387
10.532991 4.533 4.668 4.511
10.453759 4.531 4.688 4.626
10.484182 4.438 4.74 4.569
10.511696 4.445 4.594 4.784
10.47995 4.364 4.512 4.837
10.483096 4.592 4.512 4.838
10.608523 4.302 4.823 4.721
10.638664 4.397 4.701 4.543
10.587139 4.359 4.612 4.503
10.587826 4.377 4.575 4.569
10.570727 4.232 4.477 4.62
10.580754 4.341 4.651 4.57
10.635422 4.187 4.641 4.752
10.588336 4.326 4.799 4.428
10.588119 4.379 4.59 4.605
10.68506 4.369 4.655 4.734
10.584953 4.286 4.459 4.54
10.538679 4.433 4.456 4.556
10.533305 4.202 4.558 4.476
10.643821 4.263 4.447 4.524
10.671649 4.34 4.6 4.481
10.666374 4.293 4.452 4.584
10.585189 4.381 4.608 4.435
10.578785 4.387 4.387 4.547
10.547973 4.303 4.529 4.565
10.612991 4.471 4.615 4.761
10.555217 4.301 4.571 4.701
10.595616 4.214 4.357 4.879
10.613071 4.379 4.384 4.737
10.621353 4.355 4.305 4.672
10.656056 4.364 4.437 4.814
10.732092 4.524 4.312 4.731
10.576833 4.485 4.45 4.948
10.515517 4.465 4.302 4.533
10.619229 4.54 4.411 4.6
10.587497 4.441 4.501 4.705
10.523344 4.685 4.529 4.474
10.456687 4.847 4.586 4.654
10.573926 4.605 4.666 4.666
10.623426 4.539 4.429 4.505
10.547359 4.5 4.551 4.448
10.590156 4.464 4.553 4.347
10.652674 4.437 4.441 4.481
10.592446 4.61 4.169 4.299
10.509305 4.7 4.388 4.39
10.542905 4.608 4.399 4.547
10.600542 4.562 4.455 4.555
10.614724 4.683 4.398 4.587
10.587638 4.682 4.395 4.383
10.609237 4.48 4.355 4.272
10.588177 4.339 4.281 4.414
10.512957 4.423 4.471 4.244
10.534593 4.338 4.051 4.415
10.548981 4.3 4.014 4.255
10.490382 4.288 3.99 4.183
10.495414 4.324 3.971 4.081
10.509676 4.359 4.236 4.064
10.511771 4.365 4.245 4.645
10.554306 4.099 4.264 4.201
10.534561 4.2 4.172 4.292
10.548084 4.063 4.339 4.634
10.406239 4.041 4.37 4.369
10.466654 4.023 4.491 4.243
10.468967 4.085 4.5 4.287
10.590696 3.906 4.572 4.452
10.620288 3.903 4.647 4.475
10.607999 4.269 4.451 4.348
10.630156 4.334 4.483 4.629
10.632466 4.34 4.383 4.445
10.59266 4.393 4.405 4.644
10.569856 4.433 4.421 4.639
10.718558 4.367 4.365 4.788
10.647209 4.263 4.399 4.637
10.612795 4.448 4.447 4.473
10.678093 4.398 4.272 4.408
10.65071 4.464 4.332 4.524
10.659459 4.223 4.457 4.424
10.697488 4.481 4.58 4.192
10.632758 4.592 4.53 4.109
10.592019 4.585 4.525 4.318
10.615236 4.49 4.456 4.287
10.669765 4.478 4.449 4.328
10.648477 4.412 4.29 4.36
10.674931 4.341 4.348 4.317
10.571348 4.136 4.505 4.359
10.641921 4.404 4.396 4.274
10.668991 4.495 4.32 4.388
10.659413 4.114 4.31 4.416
10.612135 4.176 4.209 4.508
10.557876 4.314 4.321 4.572
10.558391 4.297 4.537 4.449
10.636443 4.201 4.513 4.527
10.600803 4.331 4.316 4.622
10.586156 4.274 4.338 4.66
10.637122 4.266 4.665 4.462
10.591605 4.25 4.346 4.336
10.638653 4.304 4.504 4.306
10.668133 4.24 4.409 4.168
10.684781 4.057 4.389 4.194
10.651702 4.232 4.348 4.392
10.667093 4.264 4.426 4.435
10.723898 4.253 4.467 4.445
10.775546 4.315 4.252 4.552
10.689312 4.416 4.365 4.705
10.672941 4.021 4.316 4.486
10.591267 4.216 4.328 4.553
10.536006 4.226 4.265 4.778
10.647563 4.267 4.269 4.764
10.653535 4.559 4.371 4.526
10.655706 4.516 4.32 4.537
10.667605 4.452 4.128 4.39
10.597464 4.326 4.078 4.377
10.606495 4.467 3.992 4.165
10.571197 4.325 3.986 4.2
10.630228 4.153 4.076 4.344
10.642454 4.412 4.162 4.214
10.698238 4.624 4.108 4.144
10.704199 4.669 4.07 4.113
10.745121 4.663 4.018 4.355
10.672719 4.545 4.103 4.609
10.703016 4.633 4.129 4.534
10.642182 4.504 4.308 4.643
10.65164 4.637 4.238 4.465
10.543668 4.771 4.157 4.452
10.664653 4.729 4.18 4.407
10.699363 4.579 4.155 4.655
10.661826 4.394 4.199 4.499
10.633624 4.481 4.235 4.549
10.633066 4.434 4.242 4.419
10.598234 4.437 3.992 4.374
10.612981 4.322 4.283 4.469
10.716716 4.303 4.332 4.501
10.711618 4.596 4.393 4.431
10.654277 4.469 4.352 4.285
10.691577 4.359 4.445 4.504
10.739609 4.427 4.276 4.569
10.736515 4.463 4.164 4.651
10.632473 4.685 4.208 4.401
10.655055 4.738 4.281 4.637
10.719952 4.41 4.185 4.497
10.638257 4.448 4.046 4.542
10.647316 4.614 4.016 4.335
10.588131 4.557 4.197 4.295
10.633569 4.381 4.155 4.471
10.588876 4.487 4.219 4.266
10.562937 4.534 4.21 4.232
10.609263 4.529 4.145 4.169
10.570071 4.423 4.246 4.222
10.62769 4.618 4.198 4.156
10.631208 4.495 4.018 4.095
10.673396 4.272 4.041 4.214
10.607997 4.485 4.323 4.236
10.601076 4.546 4.209 4.36
10.597463 4.439 4.197 4.41
10.610419 4.449 4.181 4.48
10.630253 4.445 4.462 4.39
10.629934 4.431 4.341 4.341
10.690844 4.143 4.467 4.362
10.665907 4.309 4.407 4.554
10.688916 4.345 4.46 4.712
10.596773 4.435 4.42 4.638
10.653922 4.288 4.459 4.705
10.733846 4.354 4.512 4.566
10.666291 4.376 4.565 4.583
10.689341 4.521 4.268 4.492
10.585993 4.514 4.399 4.735
10.671288 4.423 4.25 4.598
10.654751 4.324 4.374 4.553
10.698917 4.507 4.211 4.615
10.654035 4.448 4.198 4.683
10.631634 4.632 4.293 4.232
10.601712 4.379 4.383 4.482
10.541622 4.189 4.298 4.439
10.579414 4.321 4.504 4.434
10.668698 4.41 4.408 4.397
10.580576 4.419 4.459 4.518
10.545034 4.416 4.516 4.41
10.60379 4.453 4.409 4.326
10.551721 4.416 4.283 4.319
10.656148 4.321 4.509 4.41
10.708296 4.463 4.382 4.397
10.670149 4.269 4.313 4.519
10.674014 4.273 4.271 4.662
10.670467 4.164 4.284 4.697
10.660979 4.137 4.23 4.386
10.765055 4.366 4.287 4.586
10.708716 4.253 4.179 4.55
10.698307 4.34 4.039 4.58
10.676796 4.31 4.107 4.789
10.700948 4.508 4.101 4.757
10.661817 4.218 4.277 4.719
10.708595 4.423 4.271 4.645
10.732512 4.369 4.454 4.66
10.683315 4.225 4.366 4.623
10.687366 4.231 4.565 4.768
10.690681 4.263 4.602 4.668
10.740844 4.3 4.526 4.58
10.748943 4.114 4.357 4.591
10.718578 4.099 4.329 4.416
10.728997 4.147 4.17 4.473
10.746954 4.089 4.102 4.409
10.769295 4.079 4.112 4.542
10.819069 4.312 4.036 4.752
10.793727 4.036 4.216 4.662
10.767292 4.037 4.427 4.758
10.744683 4.085 4.47 4.598
10.731024 3.915 4.459 4.677
10.656768 3.93 4.402 4.659
10.652954 3.945 4.462 4.412
10.615891 4.129 4.596 4.469
10.700399 4.002 4.516 4.55
10.600275 3.948 4.474 4.275
10.70468 4.163 4.381 4.379
10.762083 4.22 4.379 4.205
10.744445 4.174 4.364 4.407
10.678741 4.07 4.472 4.372
10.643041 3.984 4.249 4.378
10.541903 4.111 4.544 4.486
10.533183 4.188 4.572 4.561
10.652141 4.026 4.307 4.727
10.629561 4.15 4.52 4.655
10.651999 4.371 4.65 4.614
10.672837 4.441 4.426 4.599
10.711038 4.412 4.408 4.462
10.722575 4.277 4.338 4.469
10.744149 4.423 4.3 4.613
10.699825 4.223 4.204 4.452
10.735077 4.174 4.316 4.699
9.625242 4.2 4.224 4.477
9.622412 4.223 4.295 4.529
9.704811 4.214 4.408 4.507
9.628693 4.272 4.306 4.647
9.643384 4.272 4.3 4.654
9.60815 4.323 4.397 4.498
9.648414 4.294 4.241 4.641
9.640201 4.11 4.072 4.653
9.667151 4.222 4.193 4.422
9.648772 4.158 4.202 4.447
9.646164 4.02 4.122 4.341
9.623279 4.202 4.108 4.339
9.657064 4.277 4.039 4.416
9.62352 4.449 4.161 4.55
9.620522 4.712 4.025 4.398
9.637644 4.503 4.241 4.651
9.653417 4.253 4.37 4.45
9.49954 4.28 4.215 4.431
9.50508 4.3 4.021 4.541
9.610877 4.414 4.175 4.418
9.566751 4.511 4.124 4.455
9.589503 4.465 3.955 4.326
9.584773 4.507 4.178 4.398
9.549962 4.331 4.142 4.294
9.476886 4.41 4.021 4.456
9.509971 4.612 4.06 4.336
9.553231 4.498 4.26 4.398
9.51649 4.415 4.149 4.266
9.623916 4.083 4.161 4.194
9.632325 4.292 3.994 4.113
9.573247 4.411 4.101 4.214
9.591568 4.494 4.369 4.17
9.573167 4.491 4.233 4.227
9.510832 4.466 4.318 4.155
9.580871 4.617 4.342 4.055
9.481123 4.567 4.481 4.055
9.610566 4.528 4.665 4.219
9.659654 4.392 4.586 4.365
9.463069 4.571 4.696 4.293
9.631744 4.618 4.677 4.008
9.640663 4.448 4.655 4.201
9.626211 4.525 4.542 4.153
9.693296 4.623 4.501 4.221
9.690789 4.694 4.563 4.246
9.653425 4.721 4.527 4.164
9.597303 4.494 4.55 4.222
9.669501 4.519 4.383 4.262
9.557287 4.699 4.309 4.13
9.592179 4.39 4.459 4.128
9.595641 4.451 4.505 4.021
9.616134 4.421 4.494 4.07
9.57184 4.466 4.435 4.091
9.590539 4.595 4.406 4.107
9.612088 4.362 4.325 3.947
9.636024 4.474 4.292 4.161
9.579216 4.549 4.266 3.849
9.66793 4.576 4.464 3.945
9.651103 4.352 4.407 4.155
9.655325 4.419 4.251 3.961
9.650754 4.479 4.297 3.892
9.642459 4.503 4.282 3.815
9.651996 4.31 4.518 3.887
9.690008 4.537 4.712 3.921
9.659822 4.65 4.579 3.718
9.682021 4.602 4.457 3.889
9.746265 4.856 4.534 3.963
9.583522 4.654 4.449 3.932
9.518769 4.52 4.537 3.854
9.647398 4.552 4.368 3.857
9.698859 4.748 4.201 3.907
9.739867 4.753 4.221 4.118
9.728525 4.592 4.411 4.184
9.659479 4.589 4.27 4.191
9.752707 4.643 4.254 4.501
9.649973 4.822 4.159 4.368
9.708176 4.549 4.25 4.576
9.683419 4.725 4.422 4.538
9.690309 4.597 4.218 4.392
9.610237 4.66 4.073 4.404
9.66353 4.611 3.842 4.261
9.668826 4.646 3.952 4.363
9.661995 4.746 4.036 4.319
9.649946 4.721 4.207 4.503
9.69773 4.615 4.19 4.343
9.64449 4.64 4.142 4.219
9.651437 4.614 4.287 4.214
9.705054 4.569 4.444 4.311
9.675136 4.743 4.354 4.267
9.732789 4.621 4.218 4.197
9.780873 4.608 4.189 4.069
9.661526 4.652 4.234 4.226
9.783111 4.471 4.219 4.26
9.680132 4.418 4.36 4.296
9.748251 4.599 4.31 4.139
9.616467 4.475 4.078 4.144
9.663764 4.615 4.146 3.979
9.608123 4.533 4.118 4.034
9.61963 4.393 4.152 3.955
9.621191 4.531 4.377 4.052
9.597769 4.623 4.048 4.101
9.638258 4.61 4.225 4.123
9.703311 4.541 4.184 3.992
9.647177 4.437 4.181 3.772
9.676931 4.608 4.201 3.92
9.610857 4.695 4.08 3.919
9.700105 4.59 3.975 3.982
9.661839 4.485 3.819 4.036
9.671488 4.67 4.088 3.962
9.691107 4.399 4.311 4.037
9.766002 4.369 4.412 4.079
9.665747 4.621 4.084 4.028
9.703656 4.485 4.129 4.109
9.775168 4.39 4.274 4.136
9.669922 4.495 4.102 4.051
9.72649 4.423 4.096 4.112
9.709056 4.577 4.055 4.116
9.755197 4.188 4.028 4.043
9.752811 4.326 4.199 3.968
9.797723 4.345 4.08 3.887
9.712309 4.387 4.144 4.062
9.729883 4.443 4.356 4.052
9.672672 4.502 4.429 3.972
9.705867 4.492 4.309 4.057
9.782941 4.533 4.358 3.984
9.74795 4.613 4.35 4.051
9.72666 4.62 4.265 4.021
9.765519 4.317 4.221 4.338
9.720137 4.42 4.404 4.392
9.751783 4.321 4.355 4.411
9.654214 4.317 4.526 4.472
9.713982 4.334 4.572 4.345
9.72662 4.504 4.521 4.212
9.702262 4.761 4.446 4.334
9.701468 4.824 4.295 4.062
9.601999 4.691 4.248 4.11
9.646625 4.591 4.439 4.168
9.640091 4.741 4.317 4.109
9.68957 4.582 4.356 4.099
9.680696 4.69 4.302 3.965
9.703421 4.792 4.471 3.91
9.737497 4.776 4.33 4.153
9.746532 4.661 4.47 4.157
9.83814 4.765 4.41 4.012
9.742173 4.984 4.316 4.279
9.68589 4.918 4.355 3.998
9.71581 5.078 4.183 4.084
9.786764 5.028 4.512 3.948
9.814344 4.813 4.484 4.243
9.733344 4.698 4.605 4.134
9.811425 4.777 4.456 4.016
9.843785 4.905 4.328 4.184
9.848751 4.988 4.417 4.283
9.843211 4.794 4.265 4.076
9.770203 4.897 4.362 4.141
9.755067 4.826 4.412 4.126
9.737661 4.801 4.254 4.22
9.789812 4.717 4.06 4.083
9.799681 4.649 4.285 4.001
9.646671 4.652 4.471 4.113
9.633459 4.741 4.379 4.084
9.773213 4.668 4.343 3.997
9.774104 4.486 4.17 4.085
9.694186 4.56 4.253 4.197
9.742321 4.501 4.291 4.132
9.715544 4.459 4.251 4.144
9.742141 4.771 4.553 3.958
9.709711 4.601 4.42 4.172
9.73233 4.578 4.324 4.185
9.807016 4.605 4.413 4.024
9.889118 4.664 4.437 4.031
9.7593 4.808 4.378 4.274
9.694398 4.727 4.439 4.346
9.708777 4.553 4.285 4.32
9.743089 4.697 4.265 4.317
9.736592 4.764 4.378 4.228
9.756145 4.926 4.29 4.187
9.827299 4.604 4.31 4.251
9.808935 4.889 4.264 4.179
9.830108 4.746 4.303 4.185
9.761987 4.694 4.235 4.288
9.744192 4.719 4.192 4.208
9.762013 4.436 4.316 4.392
9.723314 4.624 4.088 4.246
9.66736 4.482 4.09 4.349
9.652835 4.812 4.202 4.393
9.686763 4.619 4.156 4.352
9.788977 4.465 4.13 4.35
9.765513 4.459 4.204 4.154
9.79113 4.508 4.294 4.253
9.788066 4.574 4.086 4.114
9.657522 4.457 4.22 3.972
9.731456 4.247 4.47 4.126
9.695641 4.351 4.548 4.089
9.731253 4.489 4.518 3.934
9.739053 4.479 4.511 3.936
9.71628 4.589 4.516 4.056
9.699278 4.612 4.505 4.108
9.734895 4.652 4.59 4.074
9.691185 4.515 4.404 4.172
9.734792 4.774 4.154 4.072
9.799223 4.492 4.134 4.108
9.814109 4.603 4.281 4.175
9.748752 4.644 4.279 4.326
9.792271 4.534 4.062 4.084
9.801911 4.565 4.24 4.205
9.725004 4.474 4.232 4.119
9.77229 4.477 4.419 4.111
9.769365 4.591 4.298 4.077
9.845128 4.537 4.458 4.058
9.756464 4.42 4.326 4.184
9.786717 4.681 4.303 4.335
9.884035 4.647 4.36 4.093
9.865968 4.667 4.469 4.303
9.743485 4.583 4.324 4.064
9.803004 4.517 4.459 3.968
9.767708 4.606 4.386 4.132
9.725065 4.644 4.307 4.422
9.83897 4.67 4.515 4.17
9.821298 4.898 4.187 4.006
9.802834 4.721 4.173 3.991
9.786917 4.716 4.238 4.056
9.798007 4.915 4.286 4.032
9.775368 4.702 4.213 4.059
9.77308 4.677 4.142 4.096
9.808048 4.907 4.342 4.051
9.737586 4.75 4.533 4.011
9.769567 4.809 4.383 3.97
9.749152 4.677 4.304 4.018
9.772545 4.594 4.232 4.111
9.801864 4.601 4.473 4.309
9.805833 4.642 4.098 4.293
9.920819 4.682 4.082 4.287
9.808009 4.738 4.158 4.16
9.814008 4.813 4.301 4.182
9.847437 4.747 4.405 4.076
9.805265 4.75 4.318 3.969
9.811501 4.735 4.301 3.881
9.831329 4.775 4.316 3.949
9.81646 4.746 4.323 3.987
9.788138 4.791 4.4 4.554
9.862302 4.637 4.213 3.952
9.896388 4.701 4.433 3.935
9.913156 4.728 4.246 3.896
9.8615 4.741 4.182 3.759
9.899397 4.734 4.295 3.869
9.834607 4.839 4.353 4.025
9.860011 4.798 4.372 3.891
9.853874 4.745 4.309 4.079
9.869341 4.632 4.381 3.885
9.859517 4.838 4.372 3.952
9.810156 4.774 4.581 3.82
9.872858 4.77 4.589 3.84
9.858618 4.678 4.417 4.075
9.923876 4.621 4.553 4.16
9.935199 4.855 4.541 3.855
9.919005 4.841 4.513 3.843
9.857 4.818 4.703 3.888
9.732385 4.748 4.429 3.859
9.853146 4.785 4.355 4.111
9.87825 4.665 4.276 4.167
9.894685 4.52 4.225 4.055
9.829533 4.724 4.238 4.1
9.861537 4.86 4.497 4.09
9.833183 4.829 4.347 3.975
9.830699 4.925 4.627 4.058
9.816042 4.684 4.297 3.985
9.800905 4.581 4.216 4.036
9.741003 4.504 4.272 4.135
9.753336 4.602 4.117 4.128
9.898852 4.673 4.319 4.17
9.804924 4.778 4.339 4.222
9.877895 4.939 4.249 4.174
9.864523 4.82 4.295 4.262
9.810166 4.733 4.213 4.099
9.810035 4.726 4.367 4.14
9.86598 4.713 4.255 3.898
9.863661 4.874 4.305 4.122
9.891859 4.69 4.355 3.956
9.882643 4.843 4.544 3.912
9.973754 4.895 4.501 4.125
9.825206 4.802 4.38 4.146
9.881602 4.768 4.312 4.229
9.876613 4.454 4.308 4.344
9.866033 4.618 4.4 4.521
9.863378 4.38 4.443 4.297
9.836738 4.452 4.386 4.392
9.84905 4.586 4.271 4.329
9.862453 4.716 4.133 4.161
9.879899 4.353 4.268 4.062
9.878352 4.511 4.392 4.001
9.851239 4.458 4.333 3.873
9.876063 4.571 4.284 4.073
9.943266 4.703 4.241 4.185
9.999848 4.601 4.329 4.285
9.932294 4.636 4.323 4.342
9.983692 4.681 4.208 4.305
9.927063 4.514 4.303 4.365
9.9175 4.684 4.25 4.243
9.81402 4.548 4.289 4.318
9.903712 4.76 4.247 4.34
9.077165 4.804 4.208 4.406
9.099063 4.707 4.184 4.35
9.183217 4.809 4.114 4.327
9.072755 4.885 3.9 4.48
9.034149 4.802 3.93 4.406
9.043928 4.781 3.952 4.517
9.018841 4.683 3.794 4.442
9.045604 4.675 3.954 4.408
9.133784 4.537 3.989 4.407
9.047565 4.552 4.185 4.331
9.001643 4.743 4.049 4.35
9.080599 4.788 3.972 4.303
9.142741 4.789 4.044 4.45
9.113777 4.775 4.043 4.511
9.072458 4.823 4.098 4.311
9.077863 4.876 3.936 4.653
9.126285 4.927 4.096 4.475
9.14623 4.832 4.378 4.798
9.122751 4.821 4.252 4.532
9.053884 4.868 4.53 4.314
9.096588 4.943 4.421 4.483
9.162238 4.991 4.54 4.568
9.055839 4.908 4.534 4.458
9.05996 5.129 4.42 4.479
9.094229 5.256 4.567 4.376
9.0581 5.22 4.538 4.399
9.081877 5.012 4.284 4.503
9.107769 4.994 4.423 4.338
9.090074 4.967 4.437 4.114
9.104471 4.975 4.407 4.18
9.034224 5.226 4.274 4.168
9.100964 4.923 4.109 4.482
9.012392 4.734 4.307 4.186
9.083544 4.827 4.21 4.175
9.126461 5.052 4.161 4.231
9.156242 4.841 4.293 4.38
9.082973 4.691 4.307 4.397
9.024098 4.768 4.265 4.777
9.115075 4.611 4.153 4.343
9.007334 4.699 4.306 4.353
9.015002 4.797 4.357 4.368
9.027634 4.618 4.2 4.361
9.173776 4.639 4.183 4.373
9.096359 4.993 4.256 4.218
9.108249 4.908 4.129 4.139
9.131862 4.782 4.162 4.103
9.061634 4.694 4.03 3.963
9.120668 4.804 4.003 3.966
9.13477 4.683 4.237 3.993
9.142502 4.778 4.136 3.986
9.025236 4.636 4.132 4.159
9.012352 4.651 4.355 4.185
9.064462 4.943 4.33 4.207
9.043549 4.747 4.292 4.15
9.081376 4.879 4.093 4.245
9.110153 4.91 4.056 3.998
9.147224 5.213 3.959 4.13
9.124991 5.187 4.035 4.16
9.033222 5.28 3.899 4.193
9.083164 5.547 4.094 3.776
9.088405 5.391 4.03 3.858
8.988067 5.378 3.83 3.897
9.057466 5.558 4.15 3.906
9.036076 5.593 4.402 3.899
9.023186 5.5 4.267 3.983
9.026651 5.278 4.001 4.242
9.139629 5.193 4.225 4.063
9.101413 4.981 4.221 4.133
9.093274 5.077 4.212 3.978
9.073686 5.05 4.168 4.105
9.071874 4.899 4.343 4.032
9.068611 5.217 4.302 4.183
9.144973 5.246 4.493 4.102
9.061011 4.94 4.417 4.011
9.040471 4.971 4.224 4.035
9.135124 5.078 4.301 3.85
9.184896 4.793 4.075 4.173
9.162443 4.795 4.289 4.166
9.183374 4.834 4.418 4.178
9.118524 4.899 4.39 4.131
9.121637 4.88 4.349 4.198
9.105624 4.788 4.536 4.033
9.16598 4.803 4.445 3.978
9.110858 4.767 4.384 4.154
9.146412 4.748 4.494 4.157
9.108425 4.877 4.461 4.157
9.200126 4.769 4.335 4.289
9.074418 4.932 4.594 4.196
9.128935 4.924 4.464 3.989
9.1502 5.058 4.344 3.808
9.200032 4.923 4.485 4.086
9.129797 5.015 4.664 4.152
9.154199 5.015 4.491 4.463
9.185034 4.946 4.423 4.149
9.15168 4.994 4.395 4.15
9.160019 4.877 4.383 4.273
9.119621 4.971 4.199 4.065
9.257911 4.984 4.28 4.132
9.203555 4.9 4.164 4.053
9.150872 4.676 4.148 4.344
9.180226 4.444 4.104 4.272
9.104989 4.58 3.957 4.292
9.105948 4.513 4.28 4.077
9.162015 4.346 4.229 4.09
9.141794 4.402 4.474 3.998
9.147988 4.482 4.423 4.046
9.247853 4.778 4.508 3.957
9.217153 4.661 4.758 4.169
9.223071 4.528 4.641 4.126
9.152767 4.636 4.706 4.335
9.15166 4.821 4.737 4.301
9.201674 4.789 4.692 4.22
9.134676 4.801 4.601 4.318
9.194209 4.81 4.424 4.31
9.177908 4.754 4.565 4.395
9.167268 4.641 4.731 4.398
9.151265 4.84 4.691 4.314
9.158896 4.952 4.785 4.292
9.243202 5.106 4.667 4.425
9.188099 4.623 4.789 4.092
9.110545 4.682 4.65 4.23
9.087826 4.733 4.649 4.322
9.066462 4.733 4.587 4.132
9.118875 4.618 4.561 4.365
9.18355 4.768 4.543 4.437
9.216438 4.797 4.586 4.392
9.227678 5 4.468 4.368
9.167844 4.999 4.554 4.504
9.214532 4.829 4.888 4.455
9.236536 4.811 4.628 4.294
9.244019 4.729 4.739 4.514
9.226339 4.823 4.721 4.559
9.208553 4.955 4.71 4.377
9.25244 4.668 4.916 4.327
9.238647 4.709 4.847 4.074
9.209187 4.672 4.855 4.336
9.210144 4.671 4.983 4.298
9.240346 4.757 4.983 4.144
9.160263 4.598 4.968 4.478
9.231668 4.402 5.021 4.486
9.138174 4.453 4.937 4.61
9.201335 4.428 4.89 4.777
9.223321 4.519 4.819 4.492
9.229561 4.612 4.737 4.538
9.203957 4.492 4.88 4.375
9.205258 4.653 4.708 4.145
9.240256 4.521 4.742 4.381
9.217741 4.703 4.937 4.341
9.278302 4.733 4.772 4.535
9.210626 4.604 4.903 4.346
9.256952 4.549 5.013 4.218
9.21986 4.523 5.046 4.289
9.172696 4.798 4.969 4.194
9.193128 4.548 4.936 4.202
9.190881 4.57 4.925 4.28
9.248664 4.584 4.938 4.13
9.197475 4.377 5 4.168
9.111945 4.581 5.246 4.259
9.119165 4.628 5.062 4.311
9.061168 4.578 4.799 4.321
9.171362 4.828 4.731 4.271
9.192259 4.742 4.765 4.35
9.144126 4.742 4.752 4.752
9.115808 5.006 4.732 4.551
9.194404 5.205 4.76 4.609
9.169123 4.971 4.715 4.721
9.178579 4.74 4.892 4.524
9.201679 4.667 4.599 4.618
9.167955 4.678 4.428 4.572
9.191741 4.56 4.54 4.627
9.231886 4.561 4.709 4.558
9.173102 4.435 4.899 4.477
9.181019 4.823 4.903 4.519
9.280002 4.623 4.954 4.495
9.178193 4.531 4.967 4.34
9.267948 4.574 4.822 4.509
9.194655 4.563 4.666 4.436
9.174611 4.538 4.651 4.454
9.169988 4.899 4.86 4.718
9.194068 4.802 4.925 4.759
9.241371 4.759 4.908 4.797
9.261096 4.658 4.809 4.74
9.299621 4.648 4.72 4.906
9.275946 4.735 4.796 4.769
9.270927 4.768 4.642 4.779
9.261936 4.608 4.84 4.732
9.177706 4.69 4.787 4.948
9.178217 4.599 4.633 4.766
9.142223 4.66 4.623 4.99
9.156223 4.861 4.519 4.857
9.156618 4.945 4.544 4.813
9.224598 4.808 4.481 4.907
9.145492 4.586 4.584 4.639
9.164219 4.552 4.563 4.588
9.236575 4.459 4.228 4.7
9.179897 4.637 4.421 4.692
9.225461 4.685 4.532 4.651
9.193425 4.71 4.474 4.559
9.236618 4.58 4.539 4.631
9.214889 4.829 4.482 4.515
9.294806 4.831 4.659 4.658
9.246879 5.009 4.513 4.668
9.212863 4.877 4.486 4.436
9.183906 5.028 4.425 4.494
9.179587 4.907 4.535 4.458
9.121349 4.696 4.396 4.489
9.1528 4.809 4.341 4.715
9.137032 4.827 4.372 4.568
9.114495 4.575 4.166 4.581
9.255757 4.521 4.237 4.625
9.158029 4.724 4.343 4.603
9.197109 4.563 4.373 4.87
9.20651 4.614 4.47 4.506
9.23403 4.495 4.613 4.837
9.198382 4.561 4.715 4.759
9.287394 4.48 4.53 4.809
9.211054 4.695 4.55 4.828
9.189912 4.791 4.51 4.759
9.189435 4.711 4.525 4.701
9.216093 4.462 4.339 5.115
9.234425 4.714 4.394 5.114
9.246538 4.64 4.588 5.003
9.226662 4.715 4.387 5.295
9.235276 4.617 4.386 5.106
9.211597 4.647 4.645 4.92
9.272246 4.582 4.372 4.678
9.195573 4.714 4.317 4.59
9.243561 4.923 4.195 4.69
9.148063 4.804 4.341 4.709
9.215055 4.731 4.421 4.74
9.271022 4.761 4.286 4.776
9.288494 4.819 4.305 4.876
9.339717 4.742 4.657 5.055
9.327173 4.6 4.78 4.74
9.337422 4.632 4.669 4.681
9.264266 4.287 4.649 4.717
9.282599 4.75 4.44 4.91
9.334484 4.805 4.559 5.232
9.342202 4.699 4.497 4.866
9.341145 4.739 4.33 4.689
9.337313 4.88 4.181 4.588
9.395841 4.67 4.361 4.803
9.368078 4.812 4.207 4.585
9.323581 4.449 4.4 4.601
9.310922 4.674 4.218 4.594
9.322837 4.823 4.304 4.434
9.322886 4.672 4.448 4.568
9.222172 4.736 4.259 4.463
9.208474 4.763 4.296 4.437
9.306316 4.797 4.399 4.373
9.407603 4.82 4.537 4.489
9.302782 4.637 4.387 4.417
9.319809 4.737 4.452 4.461
9.307799 4.704 4.275 4.27
9.306819 4.836 4.152 4.487
9.283429 4.741 4.114 4.403
9.29006 4.445 4.041 4.645
9.319784 4.563 4.249 4.605
9.278912 4.711 4.177 4.503
9.356247 4.7 4.151 4.537
9.258068 4.828 4.122 4.658
9.301211 4.834 4.25 4.705
9.223609 4.81 4.4 4.651
9.274391 4.78 4.134 4.988
9.181124 4.831 4.118 4.865
9.277418 4.791 4.292 4.677
9.274294 4.457 4.199 4.562
9.268259 4.67 4.366 4.833
9.355678 4.353 4.075 4.877
9.243398 4.356 4.024 4.965
9.305371 4.441 3.778 4.835
9.287164 4.491 4.006 4.924
9.298144 4.391 4.396 4.655
9.26828 4.424 4.263 4.849
9.320478 4.38 4.034 4.672
9.278975 4.576 4.199 4.372
9.278599 4.453 4.003 4.427
9.217773 4.678 4.116 4.545
9.226298 4.572 4.075 4.59
9.26198 4.542 4.022 4.591
9.294988 4.665 3.97 4.69
9.329146 4.737 4.097 4.793
9.306529 4.883 4.005 4.625
9.249321 4.526 4 4.515
9.273888 4.889 4.078 4.587
9.331746 4.748 4.091 4.544
9.297736 4.791 4.3 4.702
9.273998 4.771 4.205 4.491
9.218636 4.683 4.157 4.689
9.321843 4.74 4.076 4.535
9.231422 4.675 4.165 4.65
9.298299 4.658 3.989 4.725
9.333372 4.795 4.184 4.614
9.227402 4.605 4.17 4.687
9.211789 4.851 4.234 4.934
9.277191 4.661 4.236 4.653
9.294775 4.613 4.475 4.614
9.304895 4.43 4.239 4.748
9.258841 4.469 4.242 4.794
9.308732 4.494 4.39 4.996
8.400989 4.469 4.419 5.144
8.310941 4.606 4.257 5.177
8.310878 4.737 4.145 5.414
8.314821 4.735 4.265 5.163
8.275941 4.518 4.146 5.06
8.265842 4.503 4.202 5.25
8.305474 4.763 4.282 5.33
8.318565 4.662 4.231 4.895
8.293285 4.691 4.228 5.137
8.285067 4.932 4.083 4.853
8.311286 5.08 4.389 4.989
8.268767 4.506 4.489 4.894
8.267183 4.652 4.526 4.86
8.262522 5.087 4.416 4.924
8.23804 5.05 4.397 5.01
8.252155 4.801 4.196 4.992
8.28124 4.863 4.33 5.057
8.340722 4.985 4.237 4.889
8.220678 4.739 4.356 4.952
8.266823 5.115 4.311 5.112
8.254751 4.886 4.452 4.893
8.36522 4.708 4.461 4.726
8.288582 4.947 4.253 5.18
8.289685 4.928 4.257 4.823
8.282055 5.168 4.26 4.777
8.300984 5.177 4.332 5.098
8.253381 5.33 4.121 4.958
8.279085 5.524 4.331 5.058
8.33579 5.172 4.43 5.051
8.245418 5.187 4.477 4.929
8.278055 5.199 4.54 5.034
8.212552 5.034 4.321 4.799
8.314319 4.942 4.273 4.942
8.420049 5.005 4.461 5.002
8.359638 4.705 4.256 5.146
8.292105 4.708 4.446 4.878
8.332967 5.08 4.532 5.057
8.321344 4.781 4.508 4.956
8.116027 4.955 4.234 4.834
8.156523 5.01 4.419 4.761
8.162522 4.875 4.584 4.982
8.139148 4.911 4.48 4.826
8.29703 4.751 4.596 5.006
8.335185 4.865 4.576 4.768
8.270432 4.96 4.868 4.604
8.207174 5.065 5.004 4.61
8.243372 5.03 4.888 4.799
8.248695 5.067 4.875 4.698
8.388683 4.925 4.802 4.776
8.260605 4.905 4.609 4.779
8.258267 4.728 4.616 4.631
8.301301 4.884 4.5 4.737
8.281356 5.113 4.484 4.923
8.217657 5.266 4.307 5.139
8.280297 5.358 4.388 5.063
8.334068 5.146 4.469 4.789
8.212755 5.074 4.134 4.719
8.26259 5.234 4.212 4.697
8.357422 5.276 4.416 4.787
8.208463 5.042 4.668 4.642
8.307094 5.172 4.532 4.761
8.257055 5.322 4.927 5.017
8.169345 5.134 4.638 4.682
8.234308 5.071 4.776 4.768
8.184976 5.443 4.824 4.865
8.287005 5.423 4.778 4.93
8.199235 5.328 4.628 4.806
8.303015 5.325 4.732 4.925
8.235545 5.319 4.859 5.008
8.300429 5.368 4.814 4.858
8.299472 5.456 4.506 5.31
8.260237 5.172 4.545 5.223
8.285747 5.237 4.319 4.981
8.250716 5.202 4.494 4.755
8.252075 5.189 4.52 4.996
8.295942 5.218 4.606 5.399
8.314483 5.018 4.802 5.181
8.223673 5.147 4.67 4.843
8.258889 5.127 4.522 4.911
8.237698 5.546 4.52 5.189
8.238662 5.511 4.742 5.455
8.270862 5.414 4.771 5.294
8.162466 5.278 5.057 5.21
8.201336 4.955 4.923 4.983
8.209734 5.18 4.877 4.996
8.388966 5.359 5.008 5.155
8.200677 5.157 4.958 5.111
8.179776 5.107 4.922 5.014
8.266391 5.06 4.42 5.153
8.321084 5.053 4.648 4.927
8.322261 5.064 4.526 4.793
8.33048 5.18 4.554 4.832
8.248912 5.061 4.626 4.982
8.255802 5.262 4.358 5.018
8.316927 5.362 4.416 4.793
8.293638 5.24 4.499 4.721
8.302366 5.133 4.571 4.381
8.199769 5.112 4.427 4.645
8.137784 5.242 4.672 4.627
8.203809 5.23 4.566 4.515
8.157174 5.191 4.581 4.685
8.136782 5.019 4.552 4.411
8.253584 5.156 4.592 4.569
8.288236 4.976 4.322 4.696
8.399903 5.125 4.49 4.61
8.294138 5.133 4.54 4.829
8.327686 4.8 4.478 5.075
8.168106 5.026 4.508 4.977
8.254265 5.01 4.637 4.78
8.211366 5.158 4.569 4.793
8.235219 4.982 4.491 4.522
8.28521 4.821 4.604 4.588
8.197547 4.877 4.534 4.569
8.223732 4.91 4.466 4.585
8.206894 4.727 4.749 4.851
8.235409 4.747 4.662 4.522
8.246389 4.693 4.359 4.559
8.250277 4.72 4.294 4.677
8.34023 4.648 4.102 4.571
8.304984 4.764 4.479 4.443
8.297582 4.775 4.585 4.639
8.240604 4.702 4.859 4.546
8.322671 4.686 4.726 4.804
8.2111 4.582 4.733 4.445
8.260026 4.51 4.62 4.132
8.231206 4.951 4.758 4.264
8.322341 4.982 4.665 4.511
8.351301 4.809 4.459 4.481
8.285802 4.726 4.558 4.946
8.358934 4.997 4.573 4.994
8.333098 5.221 4.694 4.745
8.373592 5.117 4.751 4.867
8.278723 5.115 4.388 4.848
8.366976 5.029 4.484 4.818
8.263179 4.965 4.307 4.906
8.313371 5.044 4.132 5.247
8.266329 5.277 4.355 4.943
8.22683 5.169 4.419 4.832
8.28744 4.653 4.425 4.901
8.266426 4.434 4.434 5.031
8.283853 4.699 4.431 4.839
8.330954 4.599 4.374 5.18
8.326032 4.749 4.506 5.139
8.242287 4.761 4.554 5.085
8.285262 4.882 4.468 4.97
8.310056 4.985 4.615 5.122
8.308256 4.746 4.268 4.899
8.425698 4.767 4.51 4.864
8.288976 4.702 4.656 4.901
8.225283 4.859 4.466 4.932
8.283808 4.692 4.527 4.892
8.243695 4.965 4.462 4.862
8.243267 4.856 4.669 5.097
8.286572 4.685 4.71 5.2
8.309401 4.996 4.719 5.103
8.297182 4.952 4.559 4.807
8.347555 4.725 4.554 4.868
8.310176 4.688 4.878 5.101
8.367721 4.75 4.687 5.074
8.312103 4.457 4.944 4.986
8.263301 5.028 4.624 5.008
8.311617 4.741 4.812 4.861
8.365005 4.886 4.631 4.963
8.287866 5.062 4.753 5.103
8.319342 4.878 4.809 4.934
8.332657 4.848 4.677 4.841
8.303254 5.04 4.643 4.835
8.259283 4.884 4.921 4.754
8.240401 5.116 4.798 4.898
8.290172 5.05 4.779 4.78
8.324702 5.23 4.758 4.658
8.254665 5.059 4.625 4.811
8.25008 5.13 4.627 4.789
8.268982 4.99 4.695 4.684
8.290308 5.31 4.726 4.983
8.228672 5.07 4.768 4.756
8.217907 5.176 4.452 4.735
8.265235 5.043 4.463 4.686
8.360566 4.966 4.347 4.688
8.356241 5.194 4.68 4.989
8.33851 5.062 4.358 4.861
8.230901 5.211 4.272 4.761
8.335499 5.29 4.24 4.9
8.303498 5.605 4.2 4.76
8.292745 5.753 4.137 4.857
8.239583 5.476 4.269 4.861
8.323398 5.258 4.149 5.121
8.299205 5.292 4.132 4.961
8.302118 5.147 4.33 5.158
8.288236 5.236 4.471 5.244
8.261794 5.105 4.493 5.458
8.274594 5.145 4.333 5.526
8.281053 5.219 4.38 5.655
8.321393 5.154 4.025 5.258
8.327354 5.228 4.13 5.21
8.301413 5.349 4.221 5.496
8.288195 5.586 4.195 5.204
8.307402 5.601 4.069 5.353
8.289523 5.447 3.71 5.522
8.25295 5.413 4.148 5.104
8.311913 5.459 4.513 4.918
8.301362 5.312 4.468 5.051
8.299685 5.685 4.55 4.935
8.349723 5.726 4.475 4.956
8.324513 5.638 4.171 4.856
8.203684 5.545 4.294 5.063
8.198882 5.573 3.859 4.846
8.201108 5.365 4.219 4.86
8.243347 5.62 4.382 4.933
8.230347 5.898 4.626 4.889
8.296335 5.745 4.119 5.117
8.207451 5.86 3.849 4.997
8.226073 5.98 3.872 4.938
8.22876 5.93 4.002 5.359
8.211917 5.861 3.922 4.993
8.22067 5.851 3.856 4.925
8.208976 5.688 3.806 4.991
8.186199 5.716 3.6 4.715
8.172762 5.442 3.408 4.993
8.139113 5.526 3.081 4.952
8.218887 5.54 2.921 5.059
8.248866 5.575 3.055 5.206
8.330922 5.424 2.862 4.741
8.285085 5.511 2.62 4.953
8.233838 5.286 2.526 4.778
8.144674 5.421 2.825 4.859
8.203136 5.423 2.79 5.05
8.179224 5.463 2.612 4.915
8.118464 5.501 3.048 4.997
8.084348 5.503 3.397 5.048
8.25 5.499 3.279 5.084
8.295985 5.514 3.29 5.373
8.211368 5.381 3.158 5.291
8.176624 5.435 3.138 5.117
8.158903 5.402 3.073 5.115
8.131396 5.324 2.705 5.034
8.226253 5.476 2.589 5.296
8.132866 5.532 2.677 5.11
8.122771 5.432 2.785 5.048
8.199998 5.299 2.827 4.955
8.069019 5.33 2.638 5.092
8.110477 5.282 2.472 4.962
8.062499 5.31 2.817 5.168
8.068205 5.412 2.9 4.971
7.997986 5.343 2.602 4.941
8.025955 5.318 2.559 4.972
7.961774 5.204 2.718 5.007
7.959229 5.305 2.696 5.286
8.024943 5.252 2.459 5.018
8.124864 5.145 2.728 5.063
8.129038 5.237 2.694 4.995
8.200191 5.017 3.019 5.037
8.168438 5.221 2.876 4.97
8.062732 5.214 2.473 5.394
8.107546 5.124 2.712 5.074
8.090875 5.368 2.84 4.985
8.037471 5.23 2.839 5.121
8.104722 5.339 2.799 5.13
8.128619 5.23 3.023 5.083
8.024909 5.175 2.935 5.217
7.948004 5.094 2.777 5.17
8.047711 5.076 2.799 5.311
8.086918 5.093 3.09 5.276
8.053471 4.993 2.925 5.405
8.023019 5.01 2.731 5.14
8.029602 5.099 2.686 5.04
8.074048 5.061 2.814 5.198
8.093558 5.059 2.939 4.652
7.989011 5.009 2.718 4.577
8.064531 5.058 2.731 4.347
7.991398 5.055 2.646 4.491
8.004887 5.306 2.58 4.683
7.998207 5.111 2.831 4.779
8.071982 5.148 2.703 4.908
8.163853 4.892 2.477 4.984
8.183979 5.183 2.571 4.775
8.008286 5.218 2.206 4.785
8.058317 5.303 2.604 4.609
8.17086 5.278 2.569 4.736
8.074985 5.176 2.597 4.719
8.101126 5.18 2.554 4.809
7.999857 5.289 2.64 4.689
7.952991 5.53 2.741 4.68
7.887295 5.428 2.606 4.829
8.053794 5.475 2.436 4.723
8.068369 5.216 2.285 4.698
8.029595 5.099 2.528 4.911
8.147987 4.924 2.338 4.871
8.115073 4.85 2.657 4.852
8.110669 5.026 2.723 4.792
8.006839 5.162 2.528 4.697
8.017525 4.971 2.528 4.906
8.036302 5.141 2.321 4.923
8.015053 5.053 2.246 4.539
8.194459 5.214 2.532 4.583
8.10015 5.256 2.42 4.782
8.00773 5.329 2.439 4.76
8.116524 5.177 2.594 4.663
8.182712 5.04 2.757 4.686
8.144885 4.825 2.686 4.861
8.200158 4.851 2.472 4.943
7.704218 4.858 2.428 4.881
7.686324 4.908 2.57 5.058
7.711769 5.095 2.596 4.96
7.664879 5.026 2.249 4.957
7.679948 4.916 2.454 4.87
7.735239 4.934 2.298 4.887
7.726435 4.956 2.366 4.804
7.695755 5.073 2.261 4.879
7.701006 5.124 2.323 4.716
7.647623 4.892 2.249 4.612
7.693019 4.934 2.29 4.673
7.67668 4.911 2.188 4.624
7.745238 4.689 2.342 4.707
7.756378 4.816 2.453 4.786
7.688002 4.85 2.262 4.783
7.72387 4.799 2.331 4.751
7.689393 4.434 2.173 4.67
7.686146 4.673 2.286 4.951
7.698363 4.708 2.032 4.96
7.637914 4.77 1.952 5.11
7.624099 4.794 2.101 5.214
7.710072 4.806 2.506 4.898
7.741278 4.79 2.575 4.639
7.694798 4.672 2.714 4.719
7.674511 4.363 2.59 4.793
7.645949 4.275 2.85 4.938
7.674325 4.671 2.997 4.847
7.634083 4.31 2.668 4.723
7.684101 4.392 2.653 4.989
7.757545 4.453 2.607 5.068
7.681652 4.139 2.407 4.742
7.662721 4.169 2.417 4.867
7.709449 4.357 2.221 4.785
7.685698 4.68 2.109 4.663
7.709634 4.555 2.29 4.869
7.703357 4.188 2.288 4.657
7.694943 4.12 2.388 4.893
7.675005 3.961 2.691 4.965
7.723855 4.116 2.452 4.965
7.656216 4.222 2.81 5.054
7.715234 4.212 2.712 4.987
7.704692 4.073 2.496 4.782
7.637741 4.499 2.265 4.807
7.769679 4.61 2.498 4.801
7.645909 4.54 2.557 4.579
7.666359 4.745 2.399 4.653
7.679842 4.55 2.388 4.33
7.763372 4.431 2.61 4.535
7.682331 4.707 2.6 4.357
7.768698 4.455 2.422 4.916
7.76837 4.628 2.382 4.879
7.706369 4.611 2.639 5.22
7.771307 4.799 2.331 5.085
7.668361 4.878 2.403 5.187
7.63799 4.569 2.509 4.972
7.573897 4.885 2.234 4.817
7.710386 4.622 2.374 4.567
7.640757 4.733 2.498 4.58
7.680957 4.882 2.717 4.29
7.682252 4.655 2.253 4.674
7.594225 4.349 2.231 4.685
7.594576 4.787 2.224 4.68
7.670456 4.449 1.976 4.641
7.68209 4.81 2.237 4.869
7.670483 4.522 2.231 4.845
7.633756 4.512 2.245 4.537
7.673291 4.875 2.504 4.455
7.747059 4.984 2.503 4.518
7.722911 4.971 2.448 4.489
7.73062 4.341 2.338 4.371
7.769341 4.606 2.588 4.794
7.760093 4.534 2.642 4.574
7.698156 4.518 2.616 5.092
7.73754 4.494 2.595 5.167
7.627899 4.642 2.529 5.549
7.727344 4.291 2.212 5.319
7.741941 3.955 2.394 4.92
7.634835 4.082 2.456 5.212
7.666359 4.306 2.15 4.938
7.601137 4.065 2.073 4.694
7.700173 3.828 2.342 4.775
7.5886 3.843 2.062 4.805
7.646673 3.97 2.055 4.81
7.715923 3.397 2.515 4.809
7.569617 3.908 2.279 4.379
7.625607 3.923 2.515 4.539
7.668761 3.682 2.626 4.931
7.635308 4.164 2.482 5.032
7.650888 3.969 2.225 5.085
7.670839 3.105 2.422 4.992
7.67552 3.261 2.764 4.644
7.538678 3.515 2.512 4.567
7.716367 3.387 2.641 4.657
7.633597 3.591 2.71 4.889
7.639103 3.01 2.561 4.937
7.618401 2.814 2.604 4.566
7.667966 2.354 2.84 4.597
7.549334 2.855 2.788 4.812
7.696063 3.228 2.855 4.466
7.630978 3.312 2.776 4.677
7.565699 3.092 2.779 4.705
7.53287 3.559 2.575 4.736
7.569376 3.731 2.751 4.844
7.613181 3.742 3.009 4.968
7.58504 2.906 2.886 4.765
7.529825 3.061 2.677 4.761
7.662553 3.324 2.366 4.533
7.52006 3.182 2.475 4.353
7.5607 3.23 2.454 4.671
7.595837 2.937 2.303 4.441
7.514049 3.36 2.544 4.443
7.591399 3.146 2.946 4.853
7.671195 3.156 2.469 4.795
7.604842 2.819 2.847 5.138
7.604048 2.269 2.988 4.723
7.642382 2.153 3.068 4.373
7.5578 2.495 2.836 4.471
7.623734 2.614 2.891 4.722
7.590569 2.666 3.173 4.48
7.661503 3.183 3.221 3.779
7.568545 2.79 2.921 3.968
7.605499 2.994 2.673 4.379
7.604164 3.23 2.475 4.254
7.701485 3.134 2.726 4.369
7.641848 3.462 2.201 4.509
7.526866 2.959 2.477 4.556
7.637503 3.073 2.707 3.579
7.540826 2.751 2.528 4.703
7.501198 3.024 2.606 4.444
7.580242 3.024 2.416 4.575
7.605755 3.086 2.405 4.595
7.615827 2.828 2.639 4.747
7.633295 2.983 2.724 4.695
7.609519 3.159 2.455 4.538
7.705167 3.087 2.5 4.676
7.569765 3.151 2.597 4.453
7.586664 3.012 2.896 4.776
7.658111 2.961 3.003 4.795
7.603836 2.942 2.728 4.52
7.670214 3.272 2.715 4.482
7.638003 3.031 2.59 4.475
7.602147 3.186 2.455 4.365
7.741198 3.294 2.721 4.08
7.681952 3.412 2.622 4.366
7.749866 2.97 2.691 4.378
7.640965 2.74 2.679 4.158
7.604371 2.996 2.59 4.061
7.643239 2.609 2.441 3.858
7.654931 2.922 2.785 4.061
7.704345 3.243 2.808 3.829
7.643452 3.751 2.7 3.799
7.699624 2.979 2.724 3.795
7.630497 3.136 3.049 3.845
7.570456 3.248 2.563 3.548
7.645711 3.025 2.601 3.541
7.716571 3.389 2.374 3.312
7.634725 3.276 2.674 3.146
7.676579 3.699 2.441 2.948
7.629142 3.259 2.3 2.821
7.721052 3.145 2.278 2.946
7.652461 3.521 2.195 2.436
7.682154 3.313 2.221 2.642
7.691876 3.378 2.5 2.869
7.61968 3.238 2.403 2.611
7.632322 3.623 2.352 2.658
7.650418 3.949 2.288 2.613
7.619493 3.795 2.361 1.995
7.641279 3.618 2.481 2.338
7.726158 2.853 2.55 2.143
7.751777 2.957 2.527 2.413
7.658643 2.655 2.291 2.222
7.680634 2.435 2.119 2.332
7.620773 2.254 2.427 2.466
7.668816 2.74 2.361 2.417
7.716524 2.767 2.28 2.594
7.645187 2.596 2.501 2.363
7.693827 2.475 2.158 2.21
7.649089 2.413 2.222 2.104
7.588773 2.523 2.619 2.459
7.575746 2.567 2.494 2.39
7.63398 2.447 2.587 2.114
7.606636 2.476 2.872 2.257
7.639417 2.591 2.427 2.362
7.614157 2.76 2.551 2.173
7.655238 2.629 2.845 2.074
7.588436 2.908 2.513 2.497
7.514703 2.754 2.817 2.946
7.64358 2.713 2.985 3.323
7.652247 2.517 3.11 2.262
7.569774 2.67 3.017 2.416
7.622104 2.747 3.021 2.286
7.633906 2.92 2.933 3.567
7.695385 2.983 2.97 2.199
7.597311 3.026 2.722 2.477
7.699628 2.928 2.451 2.23
7.700193 2.883 2.739 1.896
7.650469 2.364 2.681 2.391
7.573148 2.313 2.709 2.158
7.634974 2.643 2.525 2.262
7.665163 2.671 2.444 2.389
7.66568 2.636 3.127 2.304
7.57708 2.564 2.947 2.122
7.643808 2.804 2.651 2.311
7.621199 2.952 2.598 2.161
7.583159 3.102 2.434 2.159
7.585342 2.898 2.731 2.473
7.666916 2.436 2.72 2.268
7.652335 2.521 2.885 2.243
7.55017 2.43 2.509 2.205
7.618342 2.585 3.021 1.835
7.699028 2.542 2.778 1.853
7.678204 2.904 2.301 1.756
7.654393 3 2.382 1.717
7.66444 3.004 2.369 1.848
7.608213 2.842 2.445 1.646
7.584612 2.572 2.558 1.805
7.589505 2.533 2.307 1.861
7.551758 2.313 2.429 1.913
7.582555 2.394 2.431 1.878
7.645421 2.665 2.404 2.102
7.666409 2.829 2.194 1.855
7.61005 2.627 2.217 1.823
7.650458 2.755 2.205 2.033
7.679347 2.652 2.463 2.259
7.679121 2.843 2.09 2.347
7.65823 2.767 2.187 2.269
7.681265 2.595 2.217 2.126
7.636419 2.494 2.469 2.138
7.639685 2.598 2.412 2.416
7.652458 2.892 2.622 2.048
7.608884 2.635 2.937 2.035
7.660593 2.87 2.571 2.093
7.683041 2.858 2.749 2.509
7.686536 2.84 2.466 2.46
7.599244 2.936 2.829 2.294
7.577131 2.764 2.679 2.478
7.58777 3.135 2.813 2.509
7.650903 3.038 2.6 2.507
7.699812 3.098 2.244 2.443
7.688815 2.881 2.187 2.2
7.65628 3.19 2.122 2.25
7.584719 3.003 1.919 2.137
7.572464 2.804 2.136 2.051
7.626483 2.728 2.246 2.091
7.606318 3.061 2.221 1.96
7.647001 3.013 2.28 1.825
7.604332 2.618 2.035 2.178
7.549076 2.868 2.451 2.047
7.554749 2.988 2.264 1.892
7.597926 3.086 2.418 1.963
7.584579 3.152 2.396 2.196
7.645732 3.084 2.474 2.32
7.619173 2.75 2.336 2.23
7.617117 2.569 2.228 2.326
7.629475 2.5 2.363 2.398
7.681905 2.785 2.291 2.5
7.62809 2.588 2.106 2.307
7.681332 2.933 2.161 2.146
7.567748 2.519 2.249 2.288
7.609795 2.943 2.251 1.993
7.560967 2.605 1.97 2.251
7.582604 2.768 2.039 2.353
7.556408 2.749 2.151 2.063
7.661133 2.677 2.035 2.34
7.597106 2.663 2.112 2.143
7.658699 2.636 2.277 2.117
7.635265 2.908 2.39 1.899
7.620501 2.484 2.027 2.139
7.603884 2.548 2.448 2.427
7.587721 2.42 2.145 2.31
7.599416 2.32 2.586 2.184
7.635532 2.58 2.659 2.408
7.599074 2.917 2.442 2.154
7.600584 2.682 2.188 2.161
7.651257 2.347 2.082 2.104
7.624176 2.17 2.181 1.86
7.597201 2.277 2.309 1.815
7.669449 2.334 1.961 2.144
7.616019 2.273 2.015 2.292
7.601632 2.487 1.961 1.884
7.598279 2.429 1.92 2.155
7.587563 2.146 1.889 1.946
7.624333 2.233 2.406 1.841
7.654556 2.352 1.861 1.761
7.597187 2.627 2.231 1.533
7.628749 2.78 2.434 1.764
7.643792 2.834 2.244 1.691
7.583097 2.712 2.587 1.6
7.555177 2.774 2.574 2.067
7.561083 2.953 2.231 2.334
7.622104 2.711 2.451 2.202
7.533107 3.036 2.353 2.167
7.566719 2.494 2.178 2.386
7.489465 2.41 2.683 1.902
7.495266 2.714 2.492 1.959
7.487872 2.666 2.632 1.867
7.60456 2.605 2.59 1.968
