# Supplementary material for: The role of scaffold reshaping and disassembly in dynamin driven membrane fission
Source: eLife journal article supplement (doi:10.7554/elife.39441), 2018-12-18
Supplement: supp [file elife-39441-supp-v1.zip › elife_poa_e39441_Figure_2_figure_supplement_1_source_data_2.txt]

#  DATA FILE for Fig. 2f, SUPPLEMENT Fig 1 in the paper
#
#      "The role of scaffold reshaping and disassembly
#       in dynamin driven membrane fission"
#
#  by Martina Pannuzzo, Zachary A. McDargh, and Markus Deserno
#
#  published in eLife
#
#  -------------------------------------------------------------
#  Fission driven by CONSTRICTION, ROTATION, and ELONGATION
#  -------------------------------------------------------------
#  
#  Column 1: R  (scaffold radius, in units of sigma)
#  Column 2: Rg (gyration radius of neck, in units of sigma; run 1)
#  Column 3: Rg (gyration radius of neck, in units of sigma; run 2)
#  Column 4: Rg (gyration radius of neck, in units of sigma; run 3)
#  
12.267479 5.002 5.157 5.071
11.330466 5.002 5.157 4.796
11.32767 5.002 4.997 4.753
11.361816 4.963 5.147 4.698
11.377818 5.089 5.202 4.577
11.407171 5.151 5.225 4.796
11.394427 5.018 5.214 4.558
11.450542 5.09 5.177 4.865
11.35953 5.099 5.289 4.75
11.462662 4.84 5.348 4.632
11.441612 5.07 5.439 4.564
11.334818 5.077 5.39 4.552
11.394909 5.028 5.256 4.324
11.287395 5.176 5.26 4.431
11.293473 5.111 5.071 4.418
11.349083 5.122 5.294 4.325
11.40535 5.144 5.152 4.256
11.406178 5.01 5.083 4.437
11.433041 5.039 5.077 4.481
11.478549 4.999 5.007 4.602
11.461007 4.859 4.915 4.812
11.348223 4.818 4.891 4.894
11.384845 5.002 5.119 4.912
11.266851 4.969 5.007 4.807
11.246872 4.789 5.308 4.768
11.215383 4.828 5.176 4.736
11.178205 4.648 5.196 4.803
11.307889 4.768 5.235 5.201
11.276185 4.792 5.201 5.117
11.254773 4.865 5.414 4.74
11.326557 5.078 5.421 4.836
11.376735 4.92 5.425 4.66
11.378402 5.095 5.377 4.694
11.351115 4.919 5.342 4.771
11.376307 4.822 5.331 4.735
11.36552 4.876 5.238 4.535
11.380183 4.778 5.283 4.736
11.335354 4.748 5.002 4.84
11.367751 4.873 5.239 4.88
11.264232 4.933 5.048 4.773
11.408261 4.952 4.99 4.98
11.341632 4.779 4.819 4.738
11.34173 4.914 4.901 4.808
11.473891 5.107 4.636 4.634
11.348716 4.931 4.949 4.53
11.354226 4.918 4.885 4.518
11.363061 4.796 4.833 4.711
11.34013 4.898 4.909 4.752
11.26344 4.835 4.902 4.775
11.329908 4.752 4.724 4.508
11.399452 4.797 4.702 4.577
11.367634 4.944 5.126 4.682
11.335072 4.978 5.081 4.576
11.346711 5.047 5.086 4.751
11.386385 5.009 5.039 4.729
11.382001 4.946 5.219 4.8
11.383061 4.833 5.325 4.637
11.326797 4.861 5.307 4.476
11.332789 4.984 5.093 4.723
11.381738 5.137 5.137 4.671
11.367687 5.13 5.108 4.488
11.336793 5.05 5.003 4.686
11.312145 5.191 4.985 4.634
11.386877 5.247 4.825 4.599
11.466481 4.906 4.852 4.388
11.438545 5.008 4.894 4.312
11.446392 4.829 4.842 4.778
11.462835 4.964 5.125 4.516
11.353546 4.899 5.065 4.37
11.38459 4.837 5.092 4.234
11.464354 4.902 5.103 4.015
11.500088 4.845 5.099 3.981
11.478508 4.963 4.922 4.117
11.537302 5.047 4.945 4.072
11.53745 5.171 4.914 4.182
11.561532 5.023 5.044 4.233
11.490677 5.203 4.987 4.267
11.527458 5.04 4.995 4.322
11.560179 4.981 4.829 4.325
11.431248 4.972 4.823 4.226
11.57904 4.939 4.936 4.386
11.382722 4.885 4.818 4.327
11.433432 4.932 5.008 4.246
11.317151 5.104 4.887 4.379
11.268374 5.035 4.87 4.415
11.241865 4.983 4.917 4.247
11.132843 4.951 5.01 4.149
11.381185 4.964 4.862 4.26
11.323867 4.956 4.769 4.127
11.360056 4.951 4.597 3.77
11.185725 4.789 4.473 3.926
11.203788 4.834 4.531 3.868
11.247956 4.905 4.757 4.142
11.40322 5.071 4.753 4.368
11.337331 5.16 4.849 4.365
11.363555 5.145 4.831 4.248
11.43211 5.126 4.632 4.163
11.430766 5.259 4.74 4.385
11.338354 5.064 4.732 4.533
11.334062 4.997 4.743 4.213
11.321435 4.976 4.705 4.065
11.387981 4.935 4.515 4.111
11.391558 4.825 4.664 4.175
11.425871 4.707 4.541 4.231
11.565321 4.785 4.806 4.403
11.42431 4.851 4.693 4.416
11.388554 4.53 4.865 4.407
11.433109 4.585 4.683 4.33
11.310802 4.686 4.886 4.265
11.365369 4.793 4.894 4.694
11.337513 4.893 4.583 4.465
11.357145 4.886 4.685 4.672
11.358193 5.032 4.696 4.605
11.342112 5.035 4.888 4.473
11.318849 5.052 4.853 4.597
11.305013 5.083 4.751 4.592
11.166251 5.007 4.865 4.604
11.280704 5.01 5.001 4.569
11.329369 4.828 4.866 4.917
11.345224 4.901 4.774 4.981
11.267837 4.829 4.694 4.866
11.383034 4.866 4.697 4.638
11.358339 4.958 4.866 4.657
11.37877 5.032 4.677 4.746
11.410411 4.885 4.735 4.662
11.456874 5.007 4.903 4.668
11.38422 5.123 5.1 4.609
11.364465 5.022 5.04 4.774
11.126793 4.823 5.207 4.762
11.315104 4.887 5.097 4.666
11.298937 4.848 5.071 4.625
11.425333 4.977 5.219 4.496
11.352697 4.834 5.388 4.711
11.448035 4.772 5.568 5.022
11.365841 4.944 5.498 4.579
11.382874 4.999 5.47 4.345
11.393726 5.069 5.362 4.654
11.348613 4.947 5.259 4.455
11.275031 4.93 5.287 4.458
11.353238 5.021 5.228 4.46
11.260123 4.98 5.337 4.374
11.318218 4.926 5.156 4.662
11.348302 4.829 5.177 4.605
11.375225 4.746 5.083 4.555
11.365137 4.635 4.98 4.718
11.306546 4.489 5.071 4.92
11.3479 4.627 5.111 4.724
11.318082 4.674 5.085 4.682
11.418724 4.79 4.841 4.744
11.448563 4.851 4.892 4.89
11.490706 4.9 4.933 4.728
11.549229 4.912 5.031 4.707
11.456818 5.097 4.792 4.767
11.393522 4.661 4.943 4.758
11.379103 4.821 5.004 4.758
11.351913 4.888 4.937 4.798
11.311994 4.716 4.936 4.95
11.37641 4.95 4.819 4.786
11.406631 4.963 4.675 4.587
11.330729 4.845 4.626 4.618
11.302488 4.809 4.819 4.556
11.332888 4.923 4.757 4.672
11.332742 4.806 4.753 4.636
11.244367 4.959 4.738 4.587
11.390307 4.898 4.624 4.67
11.37805 4.93 4.566 4.669
11.346294 4.7 4.605 4.644
11.408984 4.614 4.774 4.591
11.386175 4.702 4.832 4.419
11.347413 4.801 4.629 4.421
11.24832 4.867 4.995 4.418
11.364276 4.898 5.02 4.345
11.430985 4.917 4.903 4.27
11.408055 4.836 4.773 4.18
11.458535 4.558 4.793 4.208
11.465038 4.783 4.707 3.992
11.364441 4.653 4.727 4.004
11.368968 4.552 4.68 4.136
11.420132 4.507 4.748 4.01
11.491351 4.644 4.751 4.008
11.416558 4.826 4.824 4.155
11.456287 4.927 4.91 4.33
11.381064 4.874 4.715 4.188
11.379393 4.75 4.831 4.351
11.404605 4.817 5.028 4.465
11.402662 4.705 5.075 4.358
11.454174 4.865 5.209 4.397
11.492519 4.814 4.959 4.408
11.421687 4.791 4.984 4.341
11.382843 4.911 4.994 4.353
11.301229 4.906 4.983 4.284
11.321583 4.77 4.778 4.448
11.357108 4.67 4.822 4.501
11.403593 4.666 5.003 4.639
11.482814 4.604 4.866 4.387
11.380505 4.619 4.612 4.436
11.412664 4.694 4.614 4.331
11.488657 4.668 4.558 4.342
11.502039 4.685 4.568 4.278
11.374596 4.718 4.553 4.357
11.358936 4.834 4.543 4.069
11.444945 4.775 4.79 4.144
11.422013 4.85 4.647 4.113
11.504143 4.726 4.761 4.197
11.385181 4.864 4.628 4.192
11.644003 4.603 4.48 4.266
11.459651 4.698 4.707 4.208
11.543944 5.045 4.6 4.268
11.358401 4.886 4.66 4.343
11.499425 4.891 4.569 4.164
11.544709 4.843 4.562 4.175
11.580928 4.784 4.568 4.16
11.425013 4.808 4.647 4.396
11.41214 4.862 4.66 4.287
11.294189 4.753 4.579 4.337
11.44273 4.827 4.524 4.558
11.470696 4.712 4.629 4.424
11.494692 4.973 4.62 4.33
11.450159 4.698 4.769 4.28
11.44404 4.687 4.735 4.349
11.361881 4.693 4.779 4.568
11.305298 4.813 4.758 4.524
11.314803 4.876 4.862 4.374
11.362728 4.982 4.624 4.553
11.377948 4.832 4.872 4.596
11.271655 4.848 4.522 4.54
11.307859 4.92 4.636 4.468
11.473591 5.008 4.668 4.598
11.487171 4.762 4.79 4.572
11.482908 4.888 4.73 4.673
11.402555 4.821 4.673 4.37
11.45234 4.618 4.576 4.464
11.434001 4.593 4.712 4.453
11.323749 4.482 4.812 4.564
11.398672 4.675 4.651 4.666
11.390204 4.592 4.705 4.511
11.399382 4.576 4.814 4.481
11.35851 4.561 4.739 4.414
11.304117 4.521 4.561 4.53
11.322791 4.628 4.378 4.502
11.341397 4.736 4.405 4.552
11.319504 4.558 4.382 4.527
11.395494 4.706 4.478 4.66
11.402385 4.792 4.41 4.828
11.465322 4.867 4.647 4.699
11.406372 4.795 4.594 4.517
11.411906 4.714 4.588 4.781
11.368664 4.546 4.599 4.772
11.386309 4.504 4.518 4.595
11.299199 4.557 4.738 4.515
11.366783 4.558 4.683 4.398
11.421695 4.672 4.649 4.491
11.385919 4.808 4.464 4.552
11.458888 4.652 4.776 4.547
11.476245 4.644 4.56 4.434
11.459839 4.624 4.601 4.491
11.440643 4.365 4.522 4.369
11.37954 4.493 4.513 4.226
11.407601 4.425 4.448 4.242
11.247243 4.458 4.441 4.107
11.285276 4.479 4.53 4.17
11.363815 4.522 4.608 4.075
11.31227 4.55 4.321 4.216
11.301222 4.385 4.478 4.131
11.30976 4.423 4.537 3.902
11.336217 4.525 4.499 4.229
11.412444 4.32 4.614 4.368
11.42888 4.358 4.852 4.315
11.371561 4.359 4.726 4.444
11.491797 4.423 4.601 4.455
11.457675 4.527 4.615 4.603
11.46613 4.447 4.648 4.605
11.352755 4.375 4.575 4.423
11.362527 4.498 4.565 4.257
11.491504 4.719 4.385 4.323
11.600581 4.501 4.323 4.417
11.57091 4.597 4.638 4.4
11.565417 4.548 4.392 4.314
11.571858 4.535 4.674 4.436
11.506882 4.639 4.525 4.606
11.490531 4.43 4.464 4.341
11.542441 4.505 4.622 4.574
11.531946 4.685 4.659 4.541
11.50929 4.446 4.725 4.833
11.436698 4.471 4.583 4.899
11.413941 4.36 4.569 4.927
11.361571 4.651 4.555 4.738
11.355248 4.551 4.471 5.025
11.353733 4.512 4.53 4.698
11.391002 4.454 4.521 4.557
11.32409 4.349 4.297 4.508
11.24664 4.543 4.207 4.655
11.403824 4.552 4.084 4.766
11.312353 4.57 4.341 4.864
11.306879 4.666 4.481 4.813
11.311281 4.644 4.208 4.645
11.273297 4.573 4.233 4.697
11.330474 4.549 4.288 4.762
11.317829 4.598 4.352 4.81
11.262852 4.375 4.338 4.622
11.337667 4.38 4.415 4.624
10.815521 4.368 4.392 4.779
10.786437 4.628 4.466 4.839
10.852978 4.57 4.421 4.746
10.839717 4.706 4.57 4.725
10.899225 4.625 4.476 4.658
10.783341 4.582 4.446 4.802
10.841764 4.673 4.52 4.419
10.757588 4.403 4.457 4.635
10.757825 4.626 4.454 4.891
10.850212 4.669 4.418 4.711
10.909495 4.712 4.331 4.825
10.874095 4.551 4.364 4.786
10.833422 4.677 4.243 4.622
10.871042 4.485 4.292 4.633
10.912288 4.328 4.348 4.409
10.848154 4.401 4.545 4.556
10.791106 4.347 4.505 4.421
10.853275 4.172 4.582 4.599
10.873802 4.471 4.537 4.676
10.827606 4.436 4.538 4.83
10.856329 4.592 4.698 4.748
10.832176 4.499 4.597 4.695
10.834716 4.409 4.507 4.648
10.916759 4.298 4.47 4.677
10.838689 4.443 4.725 4.839
10.853054 4.405 4.579 4.797
10.796133 4.232 4.685 4.774
10.87171 4.445 4.47 4.889
10.867446 4.493 4.586 4.644
10.799415 4.18 4.555 4.812
10.980174 4.463 4.598 4.658
10.890478 4.539 4.59 4.622
10.889487 4.475 4.485 4.693
10.862127 4.551 4.545 4.602
10.807089 4.674 4.394 4.637
10.833809 4.597 4.512 4.518
10.790889 4.712 4.379 4.623
10.870643 4.681 4.321 4.732
10.774527 4.581 4.351 4.827
10.846667 4.433 4.395 4.581
10.791286 4.458 4.318 4.841
10.855466 4.47 4.533 4.718
10.875548 4.273 4.501 4.737
10.860866 4.348 4.476 4.844
10.805587 4.619 4.574 4.647
10.851229 4.551 4.437 4.824
10.89029 4.547 4.448 4.909
10.890166 4.521 4.358 4.85
10.830489 4.278 4.219 4.821
10.805292 4.258 4.245 4.777
10.872749 4.666 4.238 4.794
10.905017 4.708 4.411 4.693
10.918177 4.661 4.43 4.824
10.862668 4.836 4.461 4.636
10.85114 4.712 4.499 4.798
10.877295 4.76 4.286 4.821
10.861344 4.631 4.334 4.967
10.831171 4.557 4.25 4.975
10.838356 4.45 4.337 4.96
10.909719 4.638 4.482 4.998
10.83837 4.663 4.483 4.968
10.864718 4.653 4.597 4.915
10.704847 4.656 4.509 4.955
10.863211 4.617 4.261 5.137
10.858504 4.427 4.374 5.264
10.907444 4.554 4.522 4.956
10.779629 4.532 4.522 4.838
10.828937 4.494 4.52 4.837
10.88403 4.512 4.549 4.664
10.837526 4.597 4.498 4.732
10.857223 4.65 4.701 4.605
10.783563 4.758 4.484 4.752
10.769233 4.669 4.621 4.958
10.801878 4.511 4.734 4.924
10.799129 4.394 4.557 4.774
10.873051 4.411 4.679 4.983
10.831319 4.519 4.65 4.82
10.876052 4.594 4.573 4.677
10.948582 4.653 4.566 4.614
10.946786 4.54 4.578 4.728
10.928022 4.503 4.44 5.116
10.93579 4.553 4.329 5.368
10.980315 4.482 4.556 5.251
10.89256 4.476 4.513 4.962
10.837643 4.454 4.623 5.062
10.913568 4.435 4.704 4.878
10.840824 4.421 4.746 4.745
10.820994 4.677 4.518 4.908
10.87895 4.495 4.614 4.789
10.904462 4.548 4.642 5.142
10.802522 4.346 4.625 4.972
10.891083 4.539 4.522 5.039
10.816387 4.452 4.535 5.361
10.73245 4.753 4.712 5.076
10.830923 4.539 4.645 5.052
10.8481 4.427 4.803 4.902
10.76254 4.408 4.546 4.932
10.896407 4.455 4.71 4.758
10.816656 4.407 4.684 4.789
10.77692 4.261 4.779 5.228
10.820382 4.26 4.578 5.089
10.765011 4.334 4.569 5.009
10.795828 4.379 4.735 5.172
10.780535 4.492 4.663 5.171
10.721818 4.341 4.515 4.981
10.773434 4.429 4.394 4.658
10.771095 4.445 4.495 4.865
10.751486 4.427 4.643 4.717
10.773379 4.625 4.391 4.849
10.82462 4.564 4.528 4.925
10.811939 4.62 4.587 4.87
10.795956 4.643 4.625 4.864
10.810878 4.633 4.66 5.03
10.788584 4.532 4.769 4.865
10.849462 4.616 4.71 4.941
10.85272 4.678 4.644 5.275
10.834091 4.78 4.672 4.992
10.831236 4.654 4.724 5.198
10.85915 4.681 4.807 4.836
10.801144 4.648 4.869 4.696
10.829173 4.706 4.658 4.858
10.894105 4.633 4.721 4.737
10.905781 4.55 4.463 4.743
10.860122 4.536 4.413 4.617
10.752928 4.532 4.563 4.693
10.840998 4.552 4.627 4.586
10.895696 4.697 4.62 4.601
10.898818 4.654 4.511 4.648
10.891872 4.792 4.625 4.672
10.877349 4.87 4.707 4.532
10.760754 4.648 4.616 4.494
10.81001 4.637 4.672 4.423
10.783395 4.783 4.523 4.434
10.870947 4.576 4.683 4.44
10.839598 4.683 4.922 4.65
10.812831 4.684 4.955 4.708
10.826672 4.581 4.942 4.929
10.903864 4.673 4.961 4.773
10.91159 4.557 4.914 4.679
10.756368 4.557 4.985 4.651
10.832109 4.442 5.126 4.61
10.898913 4.574 4.968 4.791
10.859585 4.7 4.942 4.673
10.873876 4.787 4.96 4.727
10.858797 4.8 4.933 4.6
10.897045 4.631 4.9 4.626
10.874296 4.747 5.009 4.698
10.869694 4.746 4.864 4.591
10.917759 4.641 4.869 4.675
10.783985 4.764 4.723 4.925
10.91277 4.684 4.851 4.943
10.927249 4.785 4.823 4.922
10.810398 4.799 4.613 4.902
10.815866 4.648 4.863 4.767
10.811554 4.648 4.898 4.949
10.772031 4.526 4.773 4.818
10.806628 4.334 4.755 4.773
10.773749 4.223 4.619 4.867
10.836773 4.319 4.744 4.878
10.818054 4.344 4.586 5.107
10.851332 4.144 4.751 4.977
10.902768 4.321 4.924 4.751
10.893771 4.374 4.797 4.894
10.938537 4.599 4.802 5.104
10.984396 4.474 4.755 4.956
10.983046 4.465 4.761 4.913
10.890614 4.581 4.529 4.757
10.825232 4.663 4.417 4.962
10.835425 4.55 4.401 5.039
10.833957 4.463 4.651 4.671
10.861473 4.408 4.619 4.554
10.838314 4.446 4.555 4.659
10.855899 4.326 4.388 4.723
10.919681 4.409 4.628 4.707
10.861997 4.239 4.405 4.642
10.889799 4.097 4.308 4.391
10.811645 4.175 4.428 4.404
10.844022 4.139 4.416 4.457
10.756234 4.224 4.436 4.54
10.853716 3.971 4.473 4.552
10.858412 4.219 4.685 4.57
10.858275 4.425 4.79 4.379
10.897853 4.406 4.894 4.471
10.862046 4.246 4.728 4.587
10.837261 4.309 4.794 4.582
11.044711 4.154 4.776 4.414
10.995489 4.037 4.583 4.469
10.922972 3.951 4.717 4.541
10.907936 4.084 4.876 4.803
10.860099 4.197 4.893 4.887
10.90754 4.296 4.697 4.937
10.821056 4.291 4.765 5.107
10.789559 4.241 4.849 4.903
10.902317 4.28 4.858 4.755
10.811974 4.318 4.771 4.761
10.840348 4.345 4.757 4.784
10.80613 4.407 5.048 4.901
10.828554 4.468 4.978 4.717
10.788945 4.32 4.89 5.048
10.845489 4.255 4.956 4.959
10.888697 4.288 4.701 4.907
10.784396 4.394 4.75 5.249
10.770791 4.44 4.781 4.866
10.751768 4.42 4.871 5.108
10.78986 4.392 4.738 5.378
10.846265 4.531 4.746 5.054
10.862578 4.589 4.834 5.167
10.883528 4.466 4.67 5.011
10.902559 4.488 4.564 5.251
10.849872 4.412 4.586 4.766
10.941969 4.445 4.678 4.937
10.909113 4.583 4.685 4.818
10.964074 4.488 4.919 4.607
11.004158 4.572 4.796 4.854
10.924947 4.58 4.876 4.949
10.798168 4.48 4.758 5.108
10.960675 4.334 4.86 5.096
10.859543 4.402 4.802 4.79
10.79802 4.263 4.948 4.84
10.901918 4.344 4.846 5.233
10.794292 4.5 4.854 4.662
10.843026 4.385 5.023 4.718
10.829918 4.286 4.983 4.778
10.882482 4.257 5.03 5.105
10.884656 4.136 5.078 4.887
10.900616 4.067 4.755 5.111
10.969513 4.106 4.842 5.161
11.002709 4.138 4.892 5.452
10.877132 4.039 4.948 4.712
10.777264 4.283 4.855 4.924
10.926498 4.074 4.946 4.913
10.858369 4.194 5.074 4.945
10.838719 4.12 5.035 4.862
10.851368 4.222 4.903 4.803
10.843928 4.202 5.007 4.872
10.893234 4.334 4.89 4.929
10.800074 4.355 4.821 4.857
10.858162 4.303 4.774 4.785
10.908375 4.276 4.694 5.156
10.893065 4.258 4.682 4.78
10.923694 4.241 4.716 4.869
10.977477 4.376 4.655 5.044
10.903897 4.357 4.485 4.745
10.981397 4.479 4.439 5.227
10.890841 4.506 4.614 4.719
10.866793 4.192 4.7 4.656
10.842115 4.312 4.715 4.907
10.89966 4.316 4.628 5.173
10.884281 4.203 4.624 4.865
10.935132 4.344 4.894 5.038
10.884329 4.586 4.723 5.035
10.95532 4.466 4.372 4.828
10.89388 4.5 4.423 4.835
10.945938 4.449 4.457 4.737
10.926322 4.484 4.489 4.74
10.924858 4.577 4.621 4.842
10.937595 4.698 4.691 4.683
10.855065 4.698 4.845 4.643
10.836417 4.677 4.896 4.843
10.872414 4.95 4.752 5.106
10.94108 4.844 4.618 5.038
10.837044 4.912 4.589 4.95
10.947698 4.857 4.816 5.009
10.984558 4.908 4.896 5.057
10.96593 5.047 4.708 4.928
10.942767 4.986 4.765 4.723
10.87719 4.883 4.742 4.663
10.941636 4.923 4.786 4.79
10.880859 4.909 4.682 4.771
10.867193 5.11 4.691 4.521
10.815915 4.915 4.797 4.586
10.849525 4.837 4.866 4.699
10.874209 4.931 4.939 4.69
10.947239 4.611 4.765 4.695
10.961069 4.729 4.925 4.792
10.93265 4.672 4.938 4.798
10.828252 4.826 4.722 4.826
10.91353 4.867 4.891 4.873
10.968447 4.806 4.891 4.794
10.828659 4.754 4.906 4.672
10.927249 4.863 4.839 4.844
10.87361 4.893 4.712 4.655
10.797693 4.86 4.746 4.654
10.813132 4.878 4.895 4.334
10.784792 5.154 4.934 4.463
10.715279 4.843 4.891 4.438
10.821279 4.797 4.962 4.391
10.890169 4.777 4.842 4.327
10.781694 5.052 4.785 4.234
10.85183 4.86 4.758 4.287
10.782866 5.134 4.774 4.374
10.782366 4.963 4.576 4.357
10.859195 5.029 4.677 4.428
10.913732 4.841 4.723 4.412
10.92199 4.543 4.622 4.34
10.810404 4.616 4.538 4.489
10.774918 4.798 4.482 4.678
10.914405 4.783 4.481 4.454
10.81643 4.731 4.589 4.695
10.882719 4.827 4.561 4.293
10.34069 4.836 4.636 4.989
10.34069 4.698 4.402 4.319
10.392847 4.895 4.425 4.351
10.345026 4.799 4.286 4.002
10.401282 4.81 4.201 4.054
10.394542 4.914 4.327 4.029
10.409012 4.787 4.156 4.072
10.404871 4.779 4.263 4.451
10.446203 4.651 4.331 4.513
10.366153 4.503 4.408 4.542
10.383918 4.485 4.542 3.963
10.415075 4.498 4.389 4.057
10.313724 4.662 4.255 3.985
10.315568 4.392 4.387 4.169
10.305895 4.547 4.265 4.266
10.451742 4.509 4.303 4.216
10.465108 4.647 4.463 4.345
10.379078 4.606 4.226 4.234
10.427219 4.766 4.448 4.236
10.378242 4.541 4.345 4.411
10.384858 4.848 4.23 4.326
10.410927 4.753 4.176 4.448
10.471193 4.722 4.037 4.74
10.427276 4.892 4.132 4.857
10.433315 4.781 4.364 4.276
10.332394 4.585 4.229 4.405
10.393133 4.551 4.503 4.187
10.383862 4.757 4.404 4.18
10.355717 4.958 4.694 4.246
10.300901 4.836 4.811 4.166
10.399904 4.42 4.686 4.209
10.451871 4.625 4.654 4.052
10.470007 4.752 4.724 4.043
10.415712 4.803 4.541 4.183
10.37487 4.661 4.487 4.201
10.533321 4.427 4.64 4.279
10.468037 4.574 4.773 4.267
10.461996 4.43 4.863 4.173
10.474588 4.506 4.909 4.407
10.559112 4.692 4.997 4.218
10.590423 4.82 4.907 4.16
10.523105 4.431 4.861 4.654
10.501843 4.483 4.908 4.69
10.460823 4.498 4.793 4.387
10.604005 4.663 5.076 4.238
10.457102 4.575 4.864 4.335
10.524155 4.573 4.875 4.461
10.534127 4.508 4.745 4.46
10.527455 4.324 4.772 4.426
10.521822 4.533 4.657 4.454
10.593238 4.364 4.685 4.456
10.442707 4.313 4.743 4.462
10.510694 4.276 4.564 4.256
10.433881 4.403 4.568 4.241
10.495164 4.433 4.527 4.256
10.406664 4.34 4.46 4.244
10.540346 4.526 4.375 4.368
10.542168 4.274 4.273 4.221
10.458676 4.415 4.256 4.4
10.426265 4.147 4.312 4.431
10.522217 4.335 4.396 4.37
10.489652 4.264 4.356 4.517
10.371506 4.159 4.255 4.25
10.390553 4.294 4.189 4.207
10.494463 4.223 4.131 4.504
10.455097 4.282 4.101 4.539
10.391291 4.338 4.377 4.619
10.350965 4.196 4.395 4.481
10.293929 4.454 4.48 4.376
10.275089 4.467 4.219 4.266
10.380627 4.215 4.157 4.321
10.543722 4.193 4.365 4.233
10.545409 4.362 4.347 4.276
10.532991 4.315 4.322 4.462
10.453759 4.072 4.348 4.331
10.484182 4.125 4.377 4.471
10.511696 3.983 4.334 4.299
10.47995 3.876 4.171 4.535
10.483096 3.979 4.403 4.405
10.608523 4.244 4.259 4.361
10.638664 4.199 4.167 4.263
10.587139 3.993 4.248 4.359
10.587826 3.981 4.388 4.526
10.570727 3.846 4.52 4.29
10.580754 4.036 4.562 4.323
10.635422 4.034 4.471 4.212
10.588336 4.01 4.476 4.517
10.588119 3.837 4.604 4.563
10.68506 3.816 4.636 4.494
10.584953 3.67 4.591 4.581
10.538679 3.635 4.436 4.53
10.533305 3.707 4.57 4.659
10.643821 3.746 4.5 4.701
10.671649 3.995 4.384 4.528
10.666374 3.828 4.196 4.419
10.585189 4.091 4.286 4.505
10.578785 3.949 4.319 4.606
10.547973 4.128 4.436 4.645
10.612991 4.073 4.241 4.472
10.555217 4.127 4.337 4.534
10.595616 4.193 4.226 4.47
10.613071 4.099 4.307 4.358
10.621353 4.016 4.14 4.237
10.656056 4.019 4.413 4.373
10.732092 4.083 4.137 4.302
10.576833 4.316 4.052 4.157
10.515517 4.303 4.057 4.409
10.619229 4.282 4.371 4.285
10.587497 4.032 4.044 4.364
10.523344 4.338 4.09 4.273
10.456687 4.147 4.092 4.487
10.573926 4.244 4.246 4.546
10.623426 4.111 4.118 4.401
10.547359 4.042 4.167 4.127
10.590156 4.202 4.275 4.174
10.652674 4.286 4.268 4.126
10.592446 4.128 4.344 4.202
10.509305 4.284 4.194 4.105
10.542905 4.093 4.245 3.998
10.600542 4.23 4.267 3.948
10.614724 4.457 3.989 4.012
10.587638 4.331 4.194 3.885
10.609237 4.312 4.324 3.94
10.588177 4.427 4.379 4.111
10.512957 4.476 4.463 4.015
10.534593 4.373 4.163 4.091
10.548981 4.343 4.319 4.099
10.490382 4.277 4.231 4.394
10.495414 4.433 4.069 4.235
10.509676 4.304 4.125 4.234
10.511771 4.351 4.361 4.134
10.554306 4.393 4.235 4.352
10.534561 4.256 4.278 4.512
10.548084 4.3 4.267 4.276
10.406239 4.371 4.287 4.353
10.466654 4.336 4.21 4.327
10.468967 4.276 4.201 4.243
10.590696 4.301 4.237 4.404
10.620288 4.132 4.131 4.379
10.607999 4.419 4.182 4.285
10.630156 4.27 4.341 4.436
10.632466 4.622 4.351 4.514
10.59266 4.769 4.397 4.371
10.569856 4.522 4.31 4.475
10.718558 4.453 4.33 4.594
10.647209 4.461 4.428 4.608
10.612795 4.225 4.482 4.553
10.678093 4.373 4.159 4.441
10.65071 4.258 4.253 4.472
10.659459 4.488 4.307 4.429
10.697488 4.465 4.488 4.514
10.632758 4.42 4.526 4.565
10.592019 4.251 4.66 4.353
10.615236 4.394 4.523 4.151
10.669765 4.382 4.419 4.254
10.648477 4.397 4.368 4.27
10.674931 4.557 4.475 4.13
10.571348 4.487 4.484 4.036
10.641921 4.316 4.302 4.092
10.668991 4.326 4.343 4.265
10.659413 4.336 4.207 4.455
10.612135 4.391 4.324 4.248
10.557876 4.227 4.517 4.232
10.558391 4.207 4.229 4.305
10.636443 4.379 4.263 4.326
10.600803 4.282 4.412 4.472
10.586156 4.42 4.437 4.467
10.637122 4.636 4.543 4.461
10.591605 4.36 4.651 4.234
10.638653 4.345 4.673 4.209
10.668133 4.302 4.727 4.185
10.684781 4.433 4.584 4.288
10.651702 4.375 4.662 4.154
10.667093 4.323 4.854 4.117
10.723898 4.331 4.791 3.828
10.775546 4.407 4.837 3.996
10.689312 4.259 4.84 3.969
10.672941 4.304 5.34 3.992
10.591267 4.298 5.016 4.095
10.536006 4.42 4.929 4.155
10.647563 4.5 4.83 4.144
10.653535 4.446 4.766 4.202
10.655706 4.265 4.83 4.067
10.667605 4.258 4.693 4.196
10.597464 4.379 4.755 4.189
10.606495 4.383 4.839 4.28
10.571197 4.606 4.612 4.181
10.630228 4.588 4.634 4.235
10.642454 4.534 4.578 4.382
10.698238 4.618 4.577 4.504
10.704199 4.747 4.676 4.49
10.745121 4.823 4.632 4.391
10.672719 4.667 4.765 4.549
10.703016 4.653 4.559 4.396
10.642182 4.581 4.736 4.651
10.65164 4.431 4.571 4.607
10.543668 4.485 4.762 4.532
10.664653 4.399 4.671 4.586
10.699363 4.308 4.512 4.501
10.661826 4.425 4.508 4.411
10.633624 4.501 4.252 4.381
10.633066 4.627 4.335 4.479
10.598234 4.618 4.249 4.268
10.612981 4.373 4.43 4.301
10.716716 4.575 4.462 4.332
10.711618 4.311 4.595 4.185
10.654277 4.44 4.718 4.331
10.691577 4.417 4.605 4.634
10.739609 4.388 4.659 4.594
10.736515 4.383 4.588 4.212
10.632473 4.458 4.551 4.269
10.655055 4.422 4.686 4.29
10.719952 4.41 4.679 3.951
10.638257 4.262 4.662 4.435
10.647316 4.288 4.706 4.045
10.588131 4.25 4.787 4.126
10.633569 4.315 4.535 4.44
10.588876 4.229 4.548 4.363
10.562937 4.2 4.784 4.473
10.609263 4.269 4.498 4.325
10.570071 4.427 4.734 4.201
10.62769 4.327 4.632 4.005
10.631208 4.083 4.645 4.165
10.673396 4.114 4.568 4.275
10.607997 4.051 4.426 4.479
10.601076 4.153 4.723 4.411
10.597463 4.254 4.58 4.307
10.610419 4.234 4.719 4.368
10.630253 4.22 4.664 4.244
10.629934 4.348 4.95 4.163
10.690844 4.337 4.826 4.232
10.665907 4.468 4.798 4.009
10.688916 4.55 4.853 3.882
10.596773 4.49 4.883 4.053
10.653922 4.416 4.732 4.091
10.733846 4.539 4.717 3.864
10.666291 4.715 4.681 3.688
10.689341 4.694 4.845 3.441
10.585993 4.572 4.804 3.536
10.671288 4.417 4.726 3.435
10.654751 4.621 4.625 3.097
10.698917 4.586 4.768 3.191
10.654035 4.66 4.697 3.163
10.631634 4.627 4.718 3.258
10.601712 4.521 4.719 3.009
10.541622 4.444 4.699 3.18
10.579414 4.376 4.676 2.922
10.668698 4.323 4.431 3.195
10.580576 4.435 4.317 2.963
10.545034 4.59 4.522 3.193
10.60379 4.468 4.518 3.228
10.551721 4.334 4.383 3.111
10.656148 4.542 4.478 3.352
10.708296 4.406 4.171 3.256
10.670149 4.457 4.293 3.219
10.674014 4.477 4.519 3.296
10.670467 4.436 4.406 3.26
10.660979 4.342 4.29 3.454
10.765055 4.312 4.25 3.361
10.708716 4.278 4.383 3.06
10.698307 4.462 4.321 3.478
10.676796 4.351 4.236 3.079
10.700948 4.298 4.486 2.979
10.661817 4.425 4.455 3.284
10.708595 4.304 4.264 2.905
10.732512 4.337 4.307 3.071
10.683315 4.176 4.456 2.928
10.687366 4.261 4.351 2.982
10.690681 4.415 4.381 2.891
10.740844 4.493 4.65 2.96
10.748943 4.418 4.437 3.029
10.718578 4.25 4.751 2.976
10.728997 4.337 4.812 3.227
10.746954 4.343 4.719 2.95
10.769295 4.424 4.68 3.044
10.819069 4.297 4.833 3.053
10.793727 4.392 4.694 3.006
10.767292 4.592 4.616 3.138
10.744683 4.271 4.57 2.866
10.731024 4.317 4.737 2.772
10.656768 4.369 4.51 2.989
10.652954 4.467 4.542 2.742
10.615891 4.499 4.442 2.625
10.700399 4.601 4.468 2.681
10.600275 4.473 4.439 2.391
10.70468 4.34 4.238 2.397
10.762083 4.33 4.243 2.267
10.744445 4.509 4.388 2.115
10.678741 4.354 4.418 2.392
10.643041 4.498 4.248 2.299
10.541903 4.545 4.375 2.199
10.533183 4.374 4.199 2.224
10.652141 4.355 4.477 2.427
10.629561 4.265 4.489 2.384
10.651999 4.231 4.507 2.611
10.672837 4.381 4.695 3.004
10.711038 4.493 4.476 2.238
10.722575 4.323 4.554 1.767
10.744149 4.206 4.65 2.15
10.699825 4.402 4.723 1.922
10.735077 4.304 4.377 2.086
9.625242 4.358 4.447 2.224
9.622412 4.277 4.413 2.316
9.704811 4.212 4.441 2.342
9.628693 4.346 4.614 2.428
9.643384 4.313 4.724 2.739
9.60815 4.245 4.338 2.045
9.648414 4.257 4.49 2.081
9.640201 4.105 4.312 2.289
9.667151 4.11 4.536 2.073
9.648772 4.394 4.427 2.167
9.646164 4.09 4.518 2.121
9.623279 4.223 4.555 2.238
9.657064 4.253 4.427 2.138
9.62352 4.609 4.519 1.834
9.620522 4.691 4.482 2.053
9.637644 4.51 4.537 1.924
9.653417 4.339 4.625 2.117
9.49954 4.19 4.545 1.816
9.50508 3.999 4.349 1.646
9.610877 4.028 4.371 1.496
9.566751 4.082 4.409 1.628
9.589503 4.157 4.294 1.598
9.584773 4.053 4.403 1.582
9.549962 4.136 4.133 1.85
9.476886 4.164 4.348 1.826
9.509971 4.159 4.501 1.612
9.553231 4.103 4.631 1.627
9.51649 4.343 4.566 1.557
9.623916 4.222 4.389 1.272
9.632325 4.212 4.445 1.411
9.573247 4.148 4.526 1.484
9.591568 4.38 4.148 1.795
9.573167 4.166 4.294 1.524
9.510832 4.041 4.534 1.846
9.580871 4.22 4.351 1.615
9.481123 3.848 4.245 1.375
9.610566 3.947 4.436 2.331
9.659654 4.053 4.397 2.018
9.463069 4.063 4.368 1.988
9.631744 4.322 4.288 1.825
9.640663 4.199 4.281 1.451
9.626211 4.083 4.227 1.423
9.693296 4.068 4.312 1.578
9.690789 4.008 4.308 1.469
9.653425 3.935 4.505 1.593
9.597303 3.98 4.474 1.944
9.669501 4.131 4.49 2.129
9.557287 3.987 4.322 1.696
9.592179 3.925 4.324 1.751
9.595641 3.888 4.416 1.67
9.616134 3.929 3.886 1.448
9.57184 3.76 3.896 1.841
9.590539 3.681 4.061 1.664
9.612088 3.919 3.961 1.742
9.636024 4.045 3.966 1.655
9.579216 3.79 3.92 1.791
9.66793 3.932 3.89 1.574
9.651103 4.259 3.988 1.791
9.655325 4.125 3.915 1.92
9.650754 4.249 3.958 2.12
9.642459 4.183 4.02 1.825
9.651996 4.127 4.166 1.868
9.690008 4.015 4.001 1.946
9.659822 4.015 3.888 1.698
9.682021 4.041 4.158 1.466
9.746265 4.05 4.123 1.706
9.583522 3.976 3.873 1.862
9.518769 3.982 4.161 1.707
9.647398 3.958 3.941 3.449
9.698859 4.081 3.933 2.866
9.739867 4.258 3.958 1.88
9.728525 4.053 3.92 2.089
9.659479 4.047 3.9 1.903
9.752707 4.126 4.151 2.022
9.649973 4.144 4.086 1.993
9.708176 4.069 4.037 1.886
9.683419 4.052 4.099 1.492
9.690309 3.97 3.928 1.621
9.610237 4.15 4.11 1.688
9.66353 4.241 4.346 1.852
9.668826 4.165 4.265 1.754
9.661995 4.066 4.363 1.463
9.649946 4.172 4.276 1.293
9.69773 4.19 3.826 1.667
9.64449 4.26 4.021 1.498
9.651437 4.376 4.016 1.731
9.705054 4.176 4.069 1.804
9.675136 4.245 4.188 1.687
9.732789 4.148 3.913 1.806
9.780873 4.097 3.889 1.798
9.661526 4.185 4.229 1.673
9.783111 4.368 3.95 1.512
9.680132 4.24 3.998 1.685
9.748251 3.956 4.113 1.589
9.616467 4.299 3.879 1.403
9.663764 4.443 3.754 1.332
9.608123 4.262 3.806 1.552
9.61963 4.096 4.063 1.521
9.621191 4.236 4.164 1.678
9.597769 4.48 4.002 2.492
9.638258 4.317 4.048 2.972
9.703311 4.261 3.902 1.805
9.647177 4.04 3.97 1.464
9.676931 3.863 4.021 1.502
9.610857 4.002 4.007 1.478
9.700105 3.916 4.023 1.325
9.661839 4.011 4.038 1.774
9.671488 4.032 3.94 1.907
9.691107 4.045 4.023 1.523
9.766002 4.035 3.799 1.5
9.665747 3.879 4.035 1.664
9.703656 3.87 3.858 1.691
9.775168 3.841 4.005 1.633
9.669922 3.816 4.149 1.431
9.72649 3.92 4.67 1.397
9.709056 4.057 4.224 1.548
9.755197 3.99 4.069 1.317
9.752811 3.955 3.652 1.319
9.797723 4.044 4.048 1.221
9.712309 4.082 4.001 1.556
9.729883 4.085 3.819 1.772
9.672672 4.112 3.915 1.55
9.705867 3.938 4.03 1.639
9.782941 4.036 4.178 3.351
9.74795 3.954 4.389 1.505
9.72666 4.02 4.005 1.847
9.765519 3.959 4.297 1.522
9.720137 4.12 3.749 1.785
9.751783 4.22 3.934 1.829
9.654214 4.308 4.01 1.769
9.713982 4.236 3.839 1.642
9.72662 4.308 3.865 1.606
9.702262 4.376 3.312 1.631
9.701468 4.208 3.691 1.419
9.601999 4.186 3.13 1.408
9.646625 4.257 3.254 1.331
9.640091 3.973 3.509 1.566
9.68957 4.23 3.653 1.68
9.680696 3.999 3.503 1.493
9.703421 3.995 2.937 1.633
9.737497 3.953 3.272 1.643
9.746532 3.851 3.599 1.607
9.83814 4.035 3.003 1.608
9.742173 4.008 3.303 1.547
9.68589 3.991 3.097 1.46
9.71581 4.142 3.261 1.897
9.786764 4.092 2.713 1.618
9.814344 3.813 3.15 1.737
9.733344 3.807 2.99 1.538
9.811425 3.818 2.658 1.519
9.843785 3.758 3.33 1.558
9.848751 4.124 2.556 1.516
9.843211 3.679 2.749 1.776
9.770203 3.728 2.557 1.634
9.755067 3.842 2.748 1.366
9.737661 3.631 2.033 1.721
9.789812 3.692 2.531 1.601
9.799681 3.89 2.304 1.449
9.646671 3.921 2.251 1.535
9.633459 3.816 2.191 1.594
9.773213 4.015 2.725 1.588
9.774104 3.794 2.268 1.995
9.694186 3.926 2.24 1.935
9.742321 3.821 2.224 1.838
9.715544 3.861 2.145 2.012
9.742141 4.146 2.113 1.762
9.709711 3.985 2.207 1.502
9.73233 3.828 1.704 1.788
9.807016 3.568 1.76 1.427
9.889118 3.786 1.653 1.46
9.7593 4.021 1.852 1.543
9.694398 4.013 1.97 1.545
9.708777 4.04 2.045 1.572
9.743089 3.993 1.788 1.96
9.736592 3.914 1.988 1.479
9.756145 3.754 1.767 1.728
9.827299 3.806 1.924 1.598
9.808935 3.846 1.718 1.627
9.830108 3.831 1.942 1.47
9.761987 3.708 2.106 1.521
9.744192 3.879 2.182 1.694
9.762013 3.945 2.047 1.596
9.723314 3.955 2.128 1.593
9.66736 3.926 2.271 1.43
9.652835 4.008 2.147 1.491
9.686763 3.953 2.227 1.366
9.788977 3.972 1.921 1.381
9.765513 4.209 1.984 1.57
9.79113 4.207 2.128 1.476
9.788066 4.077 2.015 1.331
9.657522 4.092 2.185 1.661
9.731456 4.242 2.061 1.265
9.695641 4.163 2.064 1.339
9.731253 4.32 2.018 1.091
9.739053 4.215 1.865 1.196
9.71628 4.349 2.089 1.54
9.699278 4.305 1.873 1.579
9.734895 4.305 1.994 1.567
9.691185 4.247 2.08 1.374
9.734792 4.406 1.928 1.293
9.799223 4.326 2.194 1.379
9.814109 4.2 1.984 1.356
9.748752 4.453 1.938 1.487
9.792271 4.389 2.267 1.435
9.801911 4.273 2.253 1.732
9.725004 4.37 2.582 1.826
9.77229 4.592 1.961 1.632
9.769365 4.58 2.915 1.913
9.845128 4.555 2.154 1.665
9.756464 4.469 2.04 1.508
9.786717 4.375 2.289 1.426
9.884035 4.501 2.295 1.675
9.865968 4.578 1.924 1.36
9.743485 4.5 2.144 1.501
9.803004 4.613 2.006 1.419
9.767708 4.342 2.014 1.386
9.725065 4.387 2.031 1.448
9.83897 4.377 2.355 1.615
9.821298 4.466 2.44 1.685
9.802834 4.559 2.387 1.52
9.786917 4.519 2.413 1.694
9.798007 4.479 2.461 1.713
9.775368 4.44 2.16 1.94
9.77308 4.539 2.303 1.79
9.808048 4.52 2.217 1.861
9.737586 4.407 1.975 1.799
9.769567 4.377 2.151 1.86
9.749152 4.244 2.379 1.981
9.772545 4.21 2.021 1.724
9.801864 4.178 2.345 1.788
9.805833 4.178 2.153 1.663
9.920819 4.131 1.788 1.883
9.808009 4.399 2.352 1.895
9.814008 4.408 1.887 1.552
9.847437 4.352 1.784 1.61
9.805265 4.443 2.062 1.303
9.811501 4.51 2.025 1.564
9.831329 4.608 1.997 1.578
9.81646 4.262 1.889 1.641
9.788138 4.275 1.781 1.601
9.862302 4.512 1.656 1.388
9.896388 4.202 2.028 1.525
9.913156 4.329 2.287 1.59
9.8615 4.363 2.279 1.522
9.899397 4.36 2.338 1.442
9.834607 4.508 2.211 1.467
9.860011 4.386 2.369 1.835
9.853874 4.258 2.099 1.616
9.869341 4.468 2.503 1.35
9.859517 4.605 2.365 1.247
9.810156 4.24 2.363 1.478
9.872858 4.375 2.631 2.637
9.858618 4.355 2.513 2.607
9.923876 4.308 2.639 1.558
9.935199 4.648 2.285 1.802
9.919005 4.447 2.656 1.605
9.857 4.47 2.064 1.664
9.732385 4.551 1.752 1.592
9.853146 4.484 1.937 1.533
9.87825 4.461 1.925 1.729
9.894685 4.373 1.947 1.501
9.829533 4.519 1.968 1.544
9.861537 4.437 2.085 1.739
9.833183 4.271 2.121 1.859
9.830699 4.42 2.197 1.667
9.816042 4.392 2.346 1.589
9.800905 4.668 2.084 1.634
9.741003 4.522 2.43 1.589
9.753336 4.639 2.66 1.549
9.898852 4.468 2.2 1.587
9.804924 4.432 2.196 1.453
9.877895 4.48 2.116 1.534
9.864523 4.406 1.907 1.797
9.810166 4.355 1.95 1.59
9.810035 4.532 2.12 1.75
9.86598 4.353 1.834 1.554
9.863661 4.274 1.955 1.385
9.891859 4.078 2.087 1.473
9.882643 4.165 2.252 1.501
9.973754 3.959 2.478 1.422
9.825206 4.15 1.971 1.422
9.881602 4.236 2.254 1.626
9.876613 4.003 2.141 1.549
9.866033 4.128 1.838 1.51
9.863378 4.197 1.981 1.666
9.836738 3.996 1.832 1.489
9.84905 4.144 1.839 1.506
9.862453 4.229 1.632 1.542
9.879899 4.074 1.477 1.899
9.878352 4.209 1.584 1.614
9.851239 4.413 1.702 1.485
9.876063 4.273 1.448 1.374
9.943266 4.285 1.774 1.469
9.999848 4.268 1.752 1.479
9.932294 4.235 1.692 1.408
9.983692 4.394 1.871 
9.927063 4.31 1.763 
9.9175 4.323  
9.81402 4.444  
9.903712 4.261  
9.077165 4.17  
9.099063 4.031  
9.183217 3.994  
9.072755 3.903  
9.034149 3.895  
9.043928 3.87  
9.018841 3.958  
9.045604 3.847  
9.133784 3.866  
9.047565 3.589  
9.001643 3.613  
9.080599 3.525  
9.142741 3.659  
9.113777 3.733  
9.072458 3.6  
9.077863 3.698  
9.126285 3.439  
9.14623 3.65  
9.122751 3.458  
9.053884 3.471  
9.096588 3.409  
9.162238 3.29  
9.055839 3.734  
9.05996 3.511  
9.094229 3.563  
9.0581 3.63  
9.081877 3.52  
9.107769 3.718  
9.090074 3.939  
9.104471 3.716  
9.034224 3.793  
9.100964 3.955  
9.012392 3.613  
9.083544 3.466  
9.126461 3.672  
9.156242 3.651  
9.082973 3.615  
9.024098 3.757  
9.115075 3.746  
9.007334 3.769  
9.015002 3.706  
9.027634 3.917  
9.173776 3.871  
9.096359 3.929  
9.108249 3.226  
9.131862 3.386  
9.061634 3.511  
9.120668 3.21  
9.13477 3.257  
9.142502 3.639  
9.025236 3.415  
9.012352 3.22  
9.064462 3.263  
9.043549 3.033  
9.081376 3.065  
9.110153 3.382  
9.147224 3.624  
9.124991 3.66  
9.033222 3.348  
9.083164 3.48  
9.088405 3.437  
8.988067 3.395  
9.057466 3.427  
9.036076 3.224  
9.023186 3.053  
9.026651 2.867  
9.139629 2.572  
9.101413 3.472  
9.093274 3.327  
9.073686 3.359  
9.071874 3.168  
9.068611 3.262  
9.144973 3.454  
9.061011 3.279  
9.040471 2.806  
9.135124 2.775  
9.184896 2.883  
9.162443 2.908  
9.183374 2.561  
9.118524 2.821  
9.121637 2.841  
9.105624 2.828  
9.16598 2.488  
9.110858 2.433  
9.146412 2.545  
9.108425 2.702  
9.200126 2.836  
9.074418 2.487  
9.128935 2.722  
9.1502 3.001  
9.200032 2.846  
9.129797 2.864  
9.154199 3.038  
9.185034 2.877  
9.15168 2.851  
9.160019 3.09  
9.119621 3.261  
9.257911 2.963  
9.203555 2.927  
9.150872 2.742  
9.180226 3.087  
9.104989 3.227  
9.105948 3.438  
9.162015 3.36  
9.141794 3.252  
9.147988 3.131  
9.247853 2.948  
9.217153 3.053  
9.223071 3.05  
9.152767 2.625  
9.15166 2.606  
9.201674 2.772  
9.134676 2.871  
9.194209 2.74  
9.177908 3.087  
9.167268 2.952  
9.151265 2.909  
9.158896 3.192  
9.243202 2.92  
9.188099 2.963  
9.110545 2.513  
9.087826 2.788  
9.066462 3.051  
9.118875 2.75  
9.18355 2.474  
9.216438 2.744  
9.227678 2.675  
9.167844 2.774  
9.214532 2.788  
9.236536 2.779  
9.244019 2.671  
9.226339 3.208  
9.208553 2.926  
9.25244 2.658  
9.238647 2.651  
9.209187 2.718  
9.210144 2.715  
9.240346 2.625  
9.160263 2.474  
9.231668 2.385  
9.138174 2.312  
9.201335 2.314  
9.223321 2.106  
9.229561 1.864  
9.203957 2.039  
9.205258 2.266  
9.240256 1.977  
9.217741 1.901  
9.278302 1.925  
9.210626 2.04  
9.256952 2.034  
9.21986 2.31  
9.172696 2.076  
9.193128 2.096  
9.190881 2.283  
9.248664 2.209  
9.197475 2.366  
9.111945 2.283  
9.119165 2.404  
9.061168 2.515  
9.171362 2.385  
9.192259 2.434  
9.144126 2.317  
9.115808 2.356  
9.194404 2.107  
9.169123 2.224  
9.178579 2.071  
9.201679 2.034  
9.167955 2.054  
9.191741 1.927  
9.231886 2.11  
9.173102 1.847  
9.181019 2.166  
9.280002 2.072  
9.178193 2.229  
9.267948 2.014  
9.194655 1.853  
9.174611 1.928  
9.169988 1.981  
9.194068 1.8  
9.241371 2.053  
9.261096 2.151  
9.299621 1.933  
9.275946 1.802  
9.270927 1.553  
9.261936 1.874  
9.177706 1.911  
9.178217 2.09  
9.142223 1.992  
9.156223 2.313  
9.156618 2.544  
9.224598 2.426  
9.145492 2.187  
9.164219 2.293  
9.236575 2.439  
9.179897 2.633  
9.225461 2.497  
9.193425 2.354  
9.236618 2.807  
9.214889 2.457  
9.294806 2.317  
9.246879 2.062  
9.212863 2.221  
9.183906 2.427  
9.179587 2.433  
9.121349 2.465  
9.1528 2.496  
9.137032 2.694  
9.114495 2.228  
9.255757 2.097  
9.158029 2.426  
9.197109 2.539  
9.20651 2.588  
9.23403 2.564  
9.198382 2.305  
9.287394 2.263  
9.211054 1.902  
9.189912 2.383  
9.189435 2.289  
9.216093 2.06  
9.234425 2.287  
9.246538 2.023  
9.226662 1.982  
9.235276 2.069  
9.211597 2.473  
9.272246 2.271  
9.195573 2.286  
9.243561 1.921  
9.148063 1.887  
9.215055 1.893  
9.271022 1.927  
9.288494 1.778  
9.339717 2.03  
9.327173 2.076  
9.337422 2.152  
9.264266 1.927  
9.282599 1.784  
9.334484 1.824  
9.342202 1.877  
9.341145 1.99  
9.337313 2.279  
9.395841 2.164  
9.368078 2.176  
9.323581 1.913  
9.310922 2.153  
9.322837 2.158  
9.322886 2.079  
9.222172 2.032  
9.208474 2.148  
9.306316 2.093  
9.407603 2.193  
9.302782 2.037  
9.319809 1.836  
9.307799 2.141  
9.306819 2.181  
9.283429 1.94  
9.29006 1.989  
9.319784 2.296  
9.278912 2.116  
9.356247 2.091  
9.258068 1.969  
9.301211 1.934  
9.223609 1.7  
9.274391 1.751  
9.181124 1.911  
9.277418 1.576  
9.274294 1.673  
9.268259 1.982  
9.355678 1.781  
9.243398 1.742  
9.305371 1.52  
9.287164 1.68  
9.298144 1.828  
9.26828 1.873  
9.320478 1.812  
9.278975 1.86  
9.278599 1.664  
9.217773 1.702  
9.226298 1.837  
9.26198 2.068  
9.294988 2.147  
9.329146 1.941  
9.306529 1.885  
9.249321 1.754  
9.273888 1.766  
9.331746 1.728  
9.297736 1.879  
9.273998 1.875  
9.218636 1.847  
9.321843 1.715  
9.231422 1.728  
9.298299 1.591  
9.333372 1.816  
9.227402 1.576  
9.211789 1.683  
9.277191 1.681  
9.294775 1.851  
9.304895 1.858  
9.258841 1.81  
