# Supplementary material for: The role of scaffold reshaping and disassembly in dynamin driven membrane fission
Source: eLife journal article supplement (doi:10.7554/elife.39441), 2018-12-18
Supplement: supp [file elife-39441-supp-v1.zip › elife_poa_e39441_Figure_2_figure_supplement_1_source_data_3.txt]

#  DATA FILE for Fig. 2f, SUPPLEMENT Fig 1 in the paper
#
#      "The role of scaffold reshaping and disassembly
#       in dynamin driven membrane fission"
#
#  by Martina Pannuzzo, Zachary A. McDargh, and Markus Deserno
#
#  published in eLife
#
#  -------------------------------------------------------------
#  Fission driven by CONSTRICTION and ROTATION
#  -------------------------------------------------------------
#  
#  Column 1: R  (scaffold radius, in units of sigma)
#  Column 2: Rg (gyration radius of neck, in units of sigma; run 1)
#  Column 3: Rg (gyration radius of neck, in units of sigma; run 2)
#  Column 4: Rg (gyration radius of neck, in units of sigma; run 3)
#
12.267479	5.573	4.529	4.529
11.330466	5.73	4.529	4.529
11.32767	5.504	4.454	4.519
11.361816	5.367	4.523	4.546
11.377818	5.551	4.774	4.586
11.407171	5.385	4.614	4.657
11.394427	5.374	4.612	4.72
11.450542	5.382	4.475	4.859
11.35953	5.318	4.572	4.799
11.462662	5.067	4.707	4.752
11.441612	5.011	4.548	4.779
11.334818	5.06	4.609	4.846
11.394909	5.019	4.718	5.011
11.287395	5.076	4.539	4.799
11.293473	5.025	4.756	4.882
11.349083	5.032	4.348	4.712
11.40535	4.885	4.575	4.876
11.406178	4.832	4.698	4.62
11.433041	4.593	4.558	4.636
11.478549	5.004	4.539	4.615
11.461007	4.842	4.644	4.568
11.348223	4.838	4.704	4.518
11.384845	4.84	4.632	4.964
11.266851	5.422	4.61	4.616
11.246872	5.185	4.567	4.622
11.215383	5.088	4.695	4.748
11.178205	4.987	4.727	4.725
11.307889	4.976	4.555	4.568
11.276185	4.659	4.607	4.549
11.254773	5.137	4.619	4.576
11.326557	4.909	4.505	4.685
11.376735	4.795	4.545	4.565
11.378402	5.024	4.636	4.506
11.351115	5.029	4.532	4.58
11.376307	4.907	4.546	4.48
11.36552	4.941	4.464	4.702
11.380183	4.904	4.567	4.587
11.335354	4.928	4.744	4.52
11.367751	4.976	4.744	4.389
11.264232	4.944	4.739	4.691
11.408261	4.873	4.635	4.601
11.341632	4.861	4.565	4.552
11.34173	4.878	4.592	4.582
11.473891	5.009	4.615	4.536
11.348716	4.997	4.484	4.488
11.354226	4.958	4.804	4.55
11.363061	5.078	4.749	4.532
11.34013	5.084	4.762	4.456
11.26344	4.93	4.841	4.368
11.329908	5.076	4.587	4.274
11.399452	4.914	4.514	4.341
11.367634	4.761	4.47	4.448
11.335072	4.725	4.585	4.524
11.346711	4.778	4.511	4.486
11.386385	4.858	4.605	4.601
11.382001	4.723	4.592	4.486
11.383061	4.811	4.511	4.364
11.326797	4.863	4.594	4.426
11.332789	4.885	4.655	4.423
11.381738	4.933	4.645	4.596
11.367687	4.843	4.529	4.633
11.336793	4.782	4.584	4.701
11.312145	4.95	4.488	4.645
11.386877	4.937	4.507	4.519
11.466481	4.846	4.474	4.493
11.438545	5.007	4.355	4.596
11.446392	4.919	4.259	4.457
11.462835	4.842	4.237	4.359
11.353546	4.87	4.313	4.598
11.38459	4.964	4.332	4.854
11.464354	5.081	4.465	4.636
11.500088	4.961	4.458	4.434
11.478508	4.851	4.567	4.355
11.537302	4.831	4.684	4.407
11.53745	4.747	4.678	4.72
11.561532	4.532	4.494	4.774
11.490677	4.725	4.75	4.715
11.527458	4.753	4.757	4.622
11.560179	4.812	4.656	4.679
11.431248	4.811	4.552	4.697
11.57904	4.865	4.605	4.819
11.382722	4.747	4.421	4.759
11.433432	4.98	4.524	4.7
11.317151	4.882	4.316	4.673
11.268374	5.077	4.474	4.755
11.241865	4.701	4.429	4.628
11.132843	4.974	4.512	4.772
11.381185	4.82	4.513	4.748
11.323867	4.854	4.631	4.68
11.360056	4.799	4.468	4.54
11.185725	4.888	4.495	4.61
11.203788	4.683	4.428	4.836
11.247956	4.927	4.285	4.831
11.40322	4.671	4.247	4.742
11.337331	4.511	4.385	4.863
11.363555	4.688	4.354	4.633
11.43211	4.651	4.204	4.777
11.430766	4.575	4.162	4.343
11.338354	4.631	4.33	4.54
11.334062	4.813	4.115	4.632
11.321435	4.739	4.087	4.515
11.387981	4.754	3.898	4.496
11.391558	4.711	4.068	4.444
11.425871	4.914	4.121	4.397
11.565321	4.462	4.245	4.557
11.42431	4.593	4.391	4.455
11.388554	4.671	4.472	4.384
11.433109	4.398	4.409	4.465
11.310802	4.398	4.515	4.494
11.365369	4.598	4.552	4.311
11.337513	4.449	4.719	4.443
11.357145	4.542	4.546	4.391
11.358193	4.624	4.581	4.46
11.342112	4.556	4.609	4.444
11.318849	4.46	4.366	4.526
11.305013	4.467	4.504	4.566
11.166251	4.342	4.404	4.42
11.280704	4.582	4.513	4.377
11.329369	4.447	4.456	4.331
11.345224	4.503	4.345	4.222
11.267837	4.513	4.473	4.478
11.383034	4.275	4.588	4.445
11.358339	4.456	4.547	4.494
11.37877	4.292	4.639	4.629
11.410411	4.482	4.646	4.89
11.456874	4.493	4.536	4.661
11.38422	4.566	4.565	4.695
11.364465	4.371	4.583	4.669
11.126793	4.306	4.755	4.646
11.315104	4.383	4.777	4.541
11.298937	4.276	4.878	4.539
11.425333	4.564	5.023	4.565
11.352697	4.599	4.998	4.616
11.448035	4.49	4.828	4.64
11.365841	4.281	4.831	4.583
11.382874	4.438	4.758	4.583
11.393726	4.567	4.844	4.626
11.348613	4.536	4.665	4.573
11.275031	4.596	4.847	4.531
11.353238	4.621	4.851	4.571
11.260123	4.82	4.689	4.499
11.318218	4.486	4.52	4.546
11.348302	4.637	4.731	4.383
11.375225	4.537	4.592	4.428
11.365137	4.493	4.579	4.443
11.306546	4.442	4.676	4.294
11.3479	4.317	4.731	4.259
11.318082	4.437	4.638	4.298
11.418724	4.285	4.696	4.257
11.448563	4.323	4.803	4.403
11.490706	4.564	4.729	4.553
11.549229	4.492	4.722	4.261
11.456818	4.482	4.541	4.36
11.393522	4.366	4.633	4.635
11.379103	4.627	4.716	4.347
11.351913	4.697	4.703	4.419
11.311994	4.849	4.732	4.625
11.37641	4.655	4.541	4.536
11.406631	4.652	4.539	4.444
11.330729	4.558	4.558	4.373
11.302488	4.646	4.603	4.388
11.332888	4.714	4.457	4.286
11.332742	4.687	4.471	4.398
11.244367	5.17	4.546	4.166
11.390307	4.791	4.438	4.153
11.37805	4.797	4.365	4.228
11.346294	4.628	4.326	4.147
11.408984	4.614	4.445	4.382
11.386175	4.507	4.358	4.23
11.347413	4.543	4.67	4.5
11.24832	4.622	4.451	4.497
11.364276	4.675	4.485	4.552
11.430985	4.65	4.504	4.424
11.408055	4.511	4.416	4.405
11.458535	4.587	4.476	4.606
11.465038	4.588	4.368	4.504
11.364441	4.666	4.351	4.467
11.368968	4.584	4.41	4.5
11.420132	4.54	4.525	4.556
11.491351	4.378	4.344	4.807
11.416558	4.552	4.298	4.565
11.456287	4.609	4.452	4.593
11.381064	4.795	4.424	4.582
11.379393	4.957	4.275	4.552
11.404605	5.04	4.432	4.63
11.402662	4.962	4.466	4.345
11.454174	4.895	4.52	4.385
11.492519	4.976	4.657	4.303
11.421687	4.771	4.694	4.352
11.382843	4.684	4.5	4.265
11.301229	4.768	4.601	4.05
11.321583	4.883	4.495	4.19
11.357108	4.91	4.649	4.262
11.403593	4.525	4.568	4.508
11.482814	4.501	4.646	4.659
11.380505	4.715	4.649	4.418
11.412664	4.711	4.675	4.381
11.488657	4.71	4.685	4.252
11.502039	4.639	4.832	4.355
11.374596	4.703	4.857	4.409
11.358936	4.833	4.836	4.292
11.444945	4.933	4.76	4.29
11.422013	4.884	4.77	4.21
11.504143	4.803	4.845	4.404
11.385181	4.754	4.705	4.355
11.644003	4.647	4.674	4.336
11.459651	4.665	4.776	4.417
11.543944	4.739	4.46	4.238
11.358401	4.572	4.642	4.466
11.499425	4.802	4.579	4.547
11.544709	4.787	4.59	4.398
11.580928	4.637	4.633	4.509
11.425013	4.792	4.629	4.686
11.41214	4.66	4.523	4.607
11.294189	4.58	4.745	4.637
11.44273	4.588	4.64	4.615
11.470696	4.546	4.677	4.505
11.494692	4.709	4.539	4.446
11.450159	4.724	4.56	4.579
11.44404	4.6	4.635	4.66
11.361881	4.814	4.503	4.405
11.305298	4.662	4.626	4.343
11.314803	4.772	4.648	4.351
11.362728	4.899	4.5	4.428
11.377948	4.871	4.666	4.187
11.271655	4.971	4.438	4.023
11.307859	4.739	4.525	4.274
11.473591	4.602	4.621	4.432
11.487171	4.798	4.687	4.381
11.482908	4.743	4.851	4.543
11.402555	4.693	4.921	4.497
11.45234	4.975	4.814	4.44
11.434001	4.965	4.771	4.46
11.323749	4.671	4.922	4.198
11.398672	4.638	4.705	4.26
11.390204	4.879	4.774	4.258
11.399382	4.652	4.514	4.226
11.35851	4.929	4.335	4.374
11.304117	4.81	4.484	4.49
11.322791	4.432	4.62	4.529
11.341397	4.618	4.784	4.703
11.319504	4.431	4.6	4.538
11.395494	4.318	4.643	4.55
11.402385	4.584	4.659	4.488
11.465322	4.322	4.717	4.169
11.406372	4.323	4.646	4.294
11.411906	4.595	4.599	4.404
11.368664	4.54	4.544	4.527
11.386309	4.531	4.667	4.491
11.299199	4.624	4.706	4.574
11.366783	4.457	4.509	4.434
11.421695	4.616	4.491	4.252
11.385919	4.557	4.615	4.282
11.458888	4.472	4.617	4.302
11.476245	4.772	4.562	4.108
11.459839	4.576	4.607	4.385
11.440643	4.675	4.653	4.396
11.37954	4.633	4.618	4.486
11.407601	4.685	4.618	4.703
11.247243	4.828	4.556	4.938
11.285276	4.893	4.741	4.951
11.363815	4.603	4.78	4.879
11.31227	4.682	4.814	4.725
11.301222	4.792	4.581	4.579
11.30976	4.668	4.912	4.74
11.336217	4.778	4.851	4.711
11.412444	4.791	4.531	4.698
11.42888	4.669	4.568	4.646
11.371561	4.687	4.837	4.775
11.491797	4.532	4.731	4.696
11.457675	4.531	4.592	4.547
11.46613	4.529	4.644	4.942
11.352755	4.496	4.686	4.69
11.362527	4.487	4.497	4.531
11.491504	4.637	4.54	4.625
11.600581	4.599	4.451	4.604
11.57091	4.663	4.53	4.677
11.565417	4.751	4.417	4.688
11.571858	4.601	4.264	4.631
11.506882	4.74	4.434	4.524
11.490531	4.724	4.602	4.439
11.542441	4.657	4.508	4.637
11.531946	4.667	4.556	4.508
11.50929	4.522	4.333	4.673
11.436698	4.338	4.442	4.64
11.413941	4.194	4.537	4.61
11.361571	4.35	4.459	4.717
11.355248	4.215	4.495	4.844
11.353733	4.139	4.548	4.764
11.391002	4.198	4.457	4.734
11.32409	4.456	4.393	4.689
11.24664	4.616	4.321	4.696
11.403824	4.499	4.437	4.67
11.312353	4.548	4.394	4.694
11.306879	4.424	4.366	4.647
11.311281	4.556	4.247	4.839
11.273297	4.57	4.122	4.73
11.330474	4.682	4.135	4.727
11.317829	4.353	4.21	4.579
11.262852	4.337	4.267	4.593
11.337667	4.492	4.422	4.535
10.815521	4.308	4.477	4.714
10.786437	4.425	4.435	4.543
10.852978	4.353	4.443	4.62
10.839717	4.293	4.586	4.542
10.899225	4.336	4.407	4.411
10.783341	4.523	4.17	4.418
10.841764	4.463	4.35	4.42
10.757588	4.733	4.301	4.43
10.757825	4.556	4.065	4.296
10.850212	4.55	4.329	4.379
10.909495	4.44	4.208	4.486
10.874095	4.605	4.321	4.419
10.833422	4.222	4.419	4.253
10.871042	4.16	4.474	4.06
10.912288	4.057	4.393	4.048
10.848154	4.013	4.313	4.056
10.791106	4.019	4.335	4.177
10.853275	3.984	4.498	4.167
10.873802	3.823	4.448	4.279
10.827606	4.163	4.45	3.981
10.856329	4.014	4.137	3.923
10.832176	3.827	4.178	4.082
10.834716	3.774	4.34	4.268
10.916759	3.808	4.213	4.378
10.838689	4.106	4.082	4.211
10.853054	4.063	4.285	3.953
10.796133	4.284	4.218	4.233
10.87171	4.269	4.256	4.324
10.867446	4.096	4.388	4.196
10.799415	4	4.384	4.223
10.980174	3.819	4.368	4.223
10.890478	3.926	4.376	4.306
10.889487	4.003	4.396	4.398
10.862127	3.824	4.433	4.232
10.807089	4.061	4.149	4.348
10.833809	3.913	4.185	4.467
10.790889	3.87	4.381	4.459
10.870643	4.074	4.435	4.23
10.774527	4.149	4.367	4.153
10.846667	4.136	4.436	4.155
10.791286	3.893	4.415	4.219
10.855466	3.87	4.393	4.121
10.875548	4.108	4.222	4.106
10.860866	3.987	4.328	4.106
10.805587	3.95	4.359	4.006
10.851229	4.077	4.285	3.982
10.89029	4.034	4.217	4.153
10.890166	3.881	4.444	4.001
10.830489	4.054	4.288	3.896
10.805292	4.077	4.469	3.91
10.872749	4.1	4.159	3.831
10.905017	4.004	4.227	3.855
10.918177	4.06	4.208	3.81
10.862668	3.914	4.032	4
10.85114	3.993	4.17	4.049
10.877295	4.036	4.023	3.821
10.861344	3.881	4.205	3.782
10.831171	3.852	4.347	3.918
10.838356	3.977	4.477	3.857
10.909719	3.934	4.071	3.981
10.83837	3.733	4.192	4.079
10.864718	3.926	4.289	4.057
10.704847	4.091	4.334	3.865
10.863211	3.998	4.34	3.967
10.858504	4.074	4.275	3.961
10.907444	3.973	4.13	3.766
10.779629	3.837	4.06	3.965
10.828937	3.89	4.344	4.03
10.88403	3.957	4.569	4.063
10.837526	4.055	4.196	4.279
10.857223	4.05	4.365	4.4
10.783563	3.919	4.277	4.067
10.769233	3.877	4.235	4.119
10.801878	3.754	4.256	3.981
10.799129	3.777	4.068	4.152
10.873051	3.75	4.1	4.152
10.831319	3.899	4.244	4.031
10.876052	3.796	4.21	4.146
10.948582	3.85	4.056	4.125
10.946786	3.848	3.925	4.189
10.928022	3.969	4.002	4.099
10.93579	3.66	3.943	4.068
10.980315	3.679	4.049	3.965
10.89256	3.872	4.259	3.986
10.837643	3.81	4.186	4.106
10.913568	3.842	4.22	4.103
10.840824	3.871	4.175	4.296
10.820994	3.717	4.198	4.3
10.87895	3.651	4.124	4.141
10.904462	4.347	4.086	4.187
10.802522	3.638	4.056	4.332
10.891083	3.777	3.896	4.325
10.816387	3.768	4.018	4.259
10.73245	3.892	3.956	4.183
10.830923	3.823	3.88	4.162
10.8481	3.731	4.015	4.268
10.76254	3.778	4.143	4.068
10.896407	3.581	4.247	3.96
10.816656	3.846	4.018	3.971
10.77692	4.002	4.113	4.066
10.820382	3.87	4.209	4.048
10.765011	3.972	4.148	4.283
10.795828	4.123	4.287	4.125
10.780535	3.874	4.1	4.199
10.721818	3.754	4.163	4.197
10.773434	4.03	3.845	4.122
10.771095	3.937	4.04	3.881
10.751486	3.917	4.06	4.017
10.773379	4.015	4.041	3.975
10.82462	3.97	3.777	4.259
10.811939	4.1	4.124	4.476
10.795956	4.052	3.899	4.251
10.810878	4.218	4.054	4.255
10.788584	4.425	4.377	4.206
10.849462	4.168	4.341	4.012
10.85272	4.135	4.228	3.919
10.834091	4.192	4.055	4.256
10.831236	4.265	4.239	4.146
10.85915	4.18	4.25	4.133
10.801144	4.149	3.892	3.825
10.829173	4.184	3.929	3.893
10.894105	4.242	3.875	3.959
10.905781	4.32	4.016	3.815
10.860122	4.295	4.011	4.004
10.752928	4.298	4.279	4.008
10.840998	4.161	4.302	3.91
10.895696	4.198	4.15	3.983
10.898818	4.151	4.38	4.079
10.891872	4.114	4.332	4.019
10.877349	4.205	4.436	3.92
10.760754	3.998	4.386	4.019
10.81001	3.909	4.399	4.015
10.783395	3.862	4.361	4.093
10.870947	3.901	4.257	3.98
10.839598	3.755	4.468	4.063
10.812831	4.041	4.528	4.141
10.826672	3.951	4.305	3.986
10.903864	4.137	4.21	3.923
10.91159	4.386	4.087	3.951
10.756368	4.363	4.342	4.1
10.832109	4.455	4.257	3.966
10.898913	4.303	4.356	4.015
10.859585	4.342	4.261	3.877
10.873876	4.284	4.399	3.795
10.858797	4.139	4.235	3.76
10.897045	4.168	4.343	3.916
10.874296	4.115	4.358	3.984
10.869694	4.313	4.372	3.725
10.917759	3.98	4.272	3.832
10.783985	4.182	4.406	3.958
10.91277	4.074	4.202	4.082
10.927249	4.081	4.257	4.277
10.810398	4.053	4.313	4.103
10.815866	4.193	4.324	4.204
10.811554	4.001	4.291	4.322
10.772031	3.914	4.29	4.292
10.806628	3.842	4.14	4.184
10.773749	4.048	4.177	4.124
10.836773	3.896	4.19	4.088
10.818054	3.917	4.092	4.122
10.851332	4.118	4.291	4.085
10.902768	4.012	4.402	3.963
10.893771	3.947	4	3.921
10.938537	3.986	4.138	3.651
10.984396	3.982	4.001	3.562
10.983046	4.198	4.358	3.816
10.890614	4.19	4.406	3.865
10.825232	4.024	4.172	3.957
10.835425	4.105	4.379	4.112
10.833957	4.013	4.091	4.076
10.861473	4.042	4.163	3.837
10.838314	3.987	4.171	3.884
10.855899	3.766	4.129	3.775
10.919681	3.822	3.962	3.909
10.861997	3.896	4.041	4.043
10.889799	3.769	4.075	4.127
10.811645	3.998	4.226	3.658
10.844022	3.757	4.146	3.816
10.756234	3.719	4.157	3.921
10.853716	3.715	4.163	3.981
10.858412	3.796	4.121	3.921
10.858275	3.652	4.405	3.946
10.897853	3.759	4.268	3.888
10.862046	3.793	4.024	3.903
10.837261	3.843	4.072	3.791
11.044711	3.74	3.978	4.089
10.995489	3.754	4.154	4.112
10.922972	3.953	4.221	3.907
10.907936	4.072	3.934	4.018
10.860099	3.941	3.9	4.006
10.90754	3.929	4.041	4.007
10.821056	4.098	4.089	4.131
10.789559	4.128	4.028	4.02
10.902317	4.167	4.169	3.779
10.811974	3.882	4.15	3.972
10.840348	4.061	4.134	3.906
10.80613	3.908	4.305	4.027
10.828554	3.897	4.293	3.85
10.788945	3.899	4.334	3.863
10.845489	3.917	4.37	3.885
10.888697	3.973	4.242	3.795
10.784396	3.783	4.258	3.784
10.770791	3.887	4.239	4.043
10.751768	3.931	4.103	3.882
10.78986	3.617	4.05	3.995
10.846265	3.72	4.319	4.067
10.862578	3.555	4.209	4.16
10.883528	3.738	4.344	4.04
10.902559	3.535	4.33	4.134
10.849872	3.692	4.146	4.137
10.941969	3.44	4.447	4.225
10.909113	3.551	4.42	4.25
10.964074	3.736	4.312	3.931
11.004158	3.794	4.507	4.095
10.924947	3.571	4.424	4.134
10.798168	3.814	4.475	4.239
10.960675	3.587	4.388	4.158
10.859543	3.53	4.392	4.195
10.79802	3.801	4.368	4.199
10.901918	3.939	4.261	4.203
10.794292	4.039	4.15	4.16
10.843026	4.15	4.084	3.907
10.829918	4.037	4.234	4.008
10.882482	4.03	4.332	4.216
10.884656	4.116	4.185	3.984
10.900616	4.168	4.185	3.852
10.969513	3.884	4.183	3.842
11.002709	3.912	4.15	4.036
10.877132	3.957	3.979	4.04
10.777264	3.98	4.02	4.047
10.926498	3.962	4.013	4.169
10.858369	3.549	3.945	3.893
10.838719	3.842	4.003	3.926
10.851368	3.624	4.328	3.959
10.843928	4.216	4.156	3.99
10.893234	3.816	4.129	4.069
10.800074	3.799	3.986	4.069
10.858162	3.909	4.05	3.997
10.908375	4.479	4.127	4.109
10.893065	3.604	4.011	4.038
10.923694	4.521	4.206	4.14
10.977477	3.662	3.988	3.971
10.903897	3.731	4.049	4.086
10.981397	3.686	4.043	4.35
10.890841	3.702	3.888	4.121
10.866793	3.691	4.009	4.072
10.842115	3.696	4.014	4.055
10.89966	3.892	3.988	4.289
10.884281	3.656	4.179	4.261
10.935132	3.817	4.199	4.132
10.884329	3.763	4.187	4.123
10.95532	3.749	4.211	4.308
10.89388	3.852	4.238	4.224
10.945938	3.959	4.417	4.126
10.926322	3.937	4.372	4.039
10.924858	3.947	4.18	4.189
10.937595	4.096	4.087	4.191
10.855065	4.189	4.188	4.118
10.836417	4.315	4.048	4.067
10.872414	4.389	4.15	4.179
10.94108	4.282	4.025	4.104
10.837044	4.165	4.161	4.137
10.947698	4.397	4.006	4.025
10.984558	4.208	3.978	4.036
10.96593	4.173	3.741	3.917
10.942767	3.891	3.869	4.065
10.87719	4.068	3.989	3.948
10.941636	3.913	4.134	4.068
10.880859	3.777	4.046	4.347
10.867193	3.89	4.234	4.173
10.815915	4.088	4.121	4.264
10.849525	3.936	4.125	4.099
10.874209	3.945	4.266	4.159
10.947239	4.022	4.123	4.272
10.961069	3.898	3.833	4.189
10.93265	3.921	3.999	4.289
10.828252	3.665	3.81	4.339
10.91353	3.63	3.981	4.265
10.968447	3.592	4.059	4.044
10.828659	3.762	3.913	4.002
10.927249	3.729	3.928	4.267
10.87361	3.931	3.9	4.379
10.797693	3.939	3.736	4.214
10.813132	4.188	3.817	4.17
10.784792	4.105	3.979	4.125
10.715279	4.254	3.883	4.147
10.821279	3.782	3.724	4.209
10.890169	3.568	3.653	4.381
10.781694	3.627	3.729	4.28
10.85183	3.509	3.803	4.063
10.782866	3.75	3.999	3.888
10.782366	3.69	3.844	4.083
10.859195	3.582	3.695	3.947
10.913732	3.528	3.644	3.941
10.92199	3.476	3.994	3.858
10.810404	3.353	4.013	3.944
10.774918	3.539	3.97	3.958
10.914405	3.626	3.856	3.862
10.81643	3.435	3.855	3.952
10.882719	3.367	3.728	3.944
10.34069	3.649	3.602	3.909
10.34069	3.692	3.623	3.809
10.392847	3.604	3.966	3.826
10.345026	3.66	3.658	3.871
10.401282	3.598	3.714	3.854
10.394542	3.557	3.914	3.682
10.409012	3.667	3.81	3.735
10.404871	3.643	3.837	3.637
10.446203	4.266	3.833	3.611
10.366153	3.58	3.656	3.531
10.383918	3.58	3.333	3.519
10.415075	3.503	3.384	3.586
10.313724	3.282	3.6	3.567
10.315568	3.418	3.123	3.531
10.305895	3.159	3.107	3.405
10.451742	3.279	3.44	3.368
10.465108	3.497	3.313	3.414
10.379078	3.496	3.311	3.445
10.427219	4.104	3.06	3.514
10.378242	3.11	2.992	3.618
10.384858	3.208	2.905	3.505
10.410927	3.214	2.949	3.616
10.471193	3.45	2.913	3.72
10.427276	3.037	2.97	3.645
10.433315	3.45	2.672	3.617
10.332394	3.349	2.682	3.485
10.393133	3.28	2.766	3.58
10.383862	3.277	2.427	3.72
10.355717	3.393	2.334	3.951
10.300901	3.243	2.669	3.935
10.399904	3.004	2.819	3.934
10.451871	2.743	2.65	3.749
10.470007	2.83	2.741	3.82
10.415712	3.033	2.506	3.656
10.37487	2.917	2.212	3.73
10.533321	2.815	2.404	3.717
10.468037	2.971	2.477	3.504
10.461996	2.84	2.343	3.807
10.474588	2.528	2.33	3.859
10.559112	3.632	2.419	3.79
10.590423	2.513	2.277	3.713
10.523105	2.43	2.31	3.642
10.501843	2.351	2.584	3.656
10.460823	2.341	2.605	3.609
10.604005	1.996	2.085	3.567
10.457102	2.031	2.266	3.591
10.524155	2.148	1.986	3.765
10.534127	2.152	2.144	3.619
10.527455	2.199	2.057	3.621
10.521822	2.214	2.099	3.513
10.593238	2.5	2.189	3.629
10.442707	2.554	2.057	3.577
10.510694	2.445	2.276	3.696
10.433881	2.27	2.424	3.644
10.495164	2.406	2.52	3.556
10.406664	2.07	2.474	3.701
10.540346	2.58	2.361	3.713
10.542168	2.31	2.302	3.595
10.458676	2.587	2.459	3.369
10.426265	2.51	2.102	3.362
10.522217	2.134	1.985	3.481
10.489652	2.548	2.197	3.443
10.371506	2.382	2.155	3.53
10.390553	2.413	2.316	3.547
10.494463	2.502	2.389	3.557
10.455097	2.15	2.133	3.41
10.391291	2.508	2.29	3.475
10.350965	2.693	2.053	3.316
10.293929	2.377	1.893	3.546
10.275089	2.271	1.938	3.455
10.380627	2.528	1.828	3.403
10.543722	2.226	2.224	3.406
10.545409	2.072	1.831	3.365
10.532991	2.053	2.119	3.545
10.453759	2.037	1.97	3.435
10.484182	1.912	1.84	3.387
10.511696	2.132	2.163	3.563
10.47995	2.337	1.999	3.738
10.483096	2.291	1.901	3.508
10.608523	2.23	1.703	3.482
10.638664	3.833	1.716	3.473
10.587139	2.412	2.053	3.539
10.587826	2.199	2.269	3.468
10.570727	2.394	2.36	3.72
10.580754	2.457	2.075	3.573
10.635422	2.107	1.97	3.374
10.588336	2.137	1.919	3.473
10.588119	2.148	2.114	3.444
10.68506	2.108	2.163	3.307
10.584953	2.174	2.069	3.465
10.538679	2.294	1.771	3.454
10.533305	2.13	1.874	3.478
10.643821	1.825	1.989	3.435
10.671649	1.947	1.971	3.546
10.666374	1.759	1.856	3.31
10.585189	1.974	2.32	3.274
10.578785	1.957	1.97	3.468
10.547973	2.065	2.051	3.448
10.612991	2.043	2.233	3.334
10.555217	1.878	1.981	3.274
10.595616	1.79	2.276	3.387
10.613071	2.238	2.072	3.451
10.621353	2.119	2.097	3.298
10.656056	2.341	1.783	3.415
10.732092	2.796	1.412	3.571
10.576833	2.214	1.85	3.46
10.515517	2.681	1.783	3.357
10.619229	2.052	1.566	3.195
10.587497	1.763	1.198	3.367
10.523344	2.227	1.602	3.535
10.456687	1.955	1.528	3.324
10.573926	2.185	1.567	3.421
10.623426	2.332	1.893	3.465
10.547359	2.276	1.902	3.48
10.590156	2.344	1.789	3.408
10.652674	2.205	1.776	3.49
10.592446	2.676	1.765	3.638
10.509305	2.101	1.831	3.343
10.542905	2.236	1.928	3.244
10.600542	2.534	1.948	3.259
10.614724	2.618	1.88	3.354
10.587638	2.631	2.128	3.175
10.609237	2.757	1.906	3.202
10.588177	2.735	1.922	3.386
10.512957	2.845	2.081	3.615
10.534593	2.761	1.972	3.453
10.548981	2.808	1.924	3.771
10.490382	2.767	1.933	3.577
10.495414	2.579	1.631	3.463
10.509676	2.432	1.829	3.598
10.511771	2.382	1.97	3.476
10.554306	2.512	2.042	3.501
10.534561	2.472	1.849	3.429
10.548084	2.403	1.633	3.323
10.406239	2.633	1.61	3.49
10.466654	2.538	1.603	3.395
10.468967	2.631	1.381	3.355
10.590696	2.664	1.39	3.29
10.620288	2.687	1.301	2.995
10.607999	2.656	1.525	3.09
10.630156	2.571	1.59	3.023
10.632466	2.339	1.568	2.99
10.59266	2.568	1.478	2.737
10.569856	2.133	1.574	3.064
10.718558	2.5	1.509	3.012
10.647209	2.414	1.564	2.862
10.612795	2.566	1.835	3.052
10.678093	2.747	1.714	2.631
10.65071	2.521	1.551	2.567
10.659459	2.603	1.703	2.677
10.697488	2.755	1.188	2.463
10.632758	3.07	1.308	2.341
10.592019	3.03	1.44	2.217
10.615236	2.99	1.582	1.84
10.669765	3.02	1.48	1.867
10.648477	3.135	1.497	1.96
10.674931	2.997	1.304	2.137
10.571348	2.906	1.26	1.807
10.641921	2.836	1.595	1.87
10.668991	2.884	1.499	1.93
10.659413	2.818	1.747	1.903
10.612135	2.464	1.681	1.735
10.557876	2.606	1.535	2.043
10.558391	2.4	1.625	2.25
10.636443	2.423	1.427	2.113
10.600803	2.223	1.295	2.019
10.586156	1.999	1.355	2.019
10.637122	1.607	1.571	2.072
10.591605	1.537	1.578	1.669
10.638653	1.749	1.493	2.038
10.668133	1.731	1.544	2.082
10.684781	1.872	1.582	1.8
10.651702	2.207	1.239	1.75
10.667093	1.934	1.47	1.657
10.723898	1.784	1.561	1.722
10.775546	1.742	1.713	1.777
10.689312	1.448	1.535	1.49
10.672941	1.67	1.48	1.433
10.591267	1.83	1.445	1.625
10.536006	1.734	1.278	1.822
10.647563	1.626	1.462	2.235
10.653535	1.585	1.484	1.931
10.655706	2.023	1.696	1.937
10.667605	1.624	1.578	1.749
10.597464	1.859	1.382	1.596
10.606495	1.812	1.485	1.785
10.571197	1.634	1.705	1.675
10.630228	1.619	1.698	1.786
10.642454	1.596	1.695	1.794
10.698238	1.854	1.869	1.697
10.704199	2.303	1.417	1.572
10.745121	2.402	1.416	1.695
10.672719	2.038	1.744	1.789
10.703016	2.271	2.107	1.756
10.642182	2.171	1.618	1.961
10.65164	2.377	1.794	1.778
10.543668	2.229	1.58	1.597
10.664653	1.954	1.377	1.802
10.699363	1.948	1.569	1.833
10.661826	2.121	1.84	1.634
10.633624	1.443	1.78	1.793
10.633066	1.599	1.319	1.486
10.598234	1.683	1.476	1.628
10.612981	1.798	1.64	1.533
10.716716	1.861	2.057	1.811
10.711618	1.982	1.885	2.183
10.654277	2.073	2.014	1.858
10.691577	2.003	1.931	1.704
10.739609	1.999	1.821	1.838
10.736515	1.856	2.015	1.579
10.632473	1.97	1.767	1.406
10.655055	2.103	2.097	1.751
10.719952	2.132	1.743	1.674
10.638257	2.011	1.587	1.703
10.647316	2.21	1.766	1.728
10.588131	2.465	1.942	1.75
10.633569	3.73	1.765	1.775
10.588876	2.401	1.951	1.67
10.562937	4.049	1.541	1.824
10.609263	2.632	1.507	2.063
10.570071	2.355	1.486	2.206
10.62769	3.973	1.364	1.624
10.631208	2.403	1.455	1.862
10.673396	2.505	1.734	1.847
10.607997	2.826	1.617	1.769
10.601076	2.511	1.582	1.728
10.597463	2.81	1.825	1.688
10.610419	2.719	1.634	1.82
10.630253	2.561	1.858	1.786
10.629934	2.11	1.719	1.58
10.690844	2.015	1.25	2.014
10.665907	2.301	1.809	1.696
10.688916	2.166	1.721	1.484
10.596773	2.379	1.733	1.695
10.653922	2.603	1.633	1.724
10.733846	2.534	1.691	1.467
10.666291	2.399	1.611	1.58
10.689341	2.146	2.241	1.977
10.585993	1.847	1.813	1.819
10.671288	1.824	1.626	1.737
10.654751	1.594	1.479	1.609
10.698917	1.984	1.486	1.446
10.654035	1.697	2.024	1.751
10.631634	1.842	1.751	1.638
10.601712	1.693	1.692	1.68
10.541622	1.763	1.848	1.577
10.579414	1.788	1.518	1.474
10.668698	1.453	1.827	1.671
10.580576	1.715	1.664	1.613
10.545034	1.977	1.797	1.351
10.60379	1.996	1.48	1.368
10.551721	1.738	1.876	1.388
10.656148	1.946	1.462	1.271
10.708296	2.11	1.451	1.306
10.670149	1.903	1.617	1.2
10.674014	2.143	1.892	1.201
10.670467	3.683	1.802	1.452
10.660979	3.922	1.721	1.664
10.765055	2.023	1.734	1.466
10.708716	4.452	1.637	1.708
10.698307	4.315	1.553	1.852
10.676796	1.872	1.509	1.849
10.700948	2.155	1.593	1.868
10.661817	1.736	1.556	1.837
10.708595	1.824	1.696	2.116
10.732512	1.72	1.527	1.974
10.683315	1.864	1.77	1.695
10.687366	1.426	1.648	1.581
10.690681	1.603	1.566	1.543
10.740844	1.585	1.994	1.367
10.748943	1.731	1.868	1.597
10.718578	1.68	1.671	1.712
10.728997	1.589	1.429	1.628
10.746954	1.502	1.503	1.641
10.769295	1.515	1.69	1.309
10.819069	1.683	1.669	1.569
10.793727	1.458	1.49	1.606
10.767292	1.201	1.863	1.698
10.744683	1.478	1.592	1.884
10.731024	1.274	1.417	1.707
10.656768	1.366	1.558	1.808
10.652954	1.67	1.554	1.722
10.615891	1.827	1.636	1.538
10.700399	1.961	1.847	1.544
10.600275	1.952	1.792	1.735
10.70468	1.645	1.618	1.706
10.762083	1.778	1.724	1.943
10.744445	1.584	2.015	1.689
10.678741	1.494	1.398	1.435
10.643041	1.273	1.485	1.301
10.541903	1.399	1.818	1.727
10.533183	1.466	1.972	1.681
10.652141	1.592	2.017	2.318
10.629561	1.401	1.56	1.748
10.651999	1.388	1.602	1.588
10.672837	1.538	1.632	1.496
10.711038	1.521	1.596	2.497
10.722575	1.622	1.603	1.215
10.744149	1.588	1.733	1.386
