# Supplementary material for: The role of scaffold reshaping and disassembly in dynamin driven membrane fission
Source: eLife journal article supplement (doi:10.7554/elife.39441), 2018-12-18
Supplement: supp [file elife-39441-supp-v1.zip › elife_poa_e39441_Figure_2_figure_supplement_1_source_data_4.txt]

#  DATA FILE for Fig. 2f, SUPPLEMENT Fig 1 in the paper
#
#      "The role of scaffold reshaping and disassembly
#       in dynamin driven membrane fission"
#
#  by Martina Pannuzzo, Zachary A. McDargh, and Markus Deserno
#
#  published in eLife
#
#  -------------------------------------------------------------
#  Fission driven by CONSTRICTION
#  -------------------------------------------------------------
#  
#  Column 1: R  (scaffold radius, in units of sigma)
#  Column 2: Rg (gyration radius of neck, in units of sigma; run 1)
#  Column 3: Rg (gyration radius of neck, in units of sigma; run 2)
#  Column 4: Rg (gyration radius of neck, in units of sigma; run 3)
#  
12.267479	5.303	8.444	4.599
11.330466	5.088	5.395	4.599
11.32767	5.164	5.395	4.566
11.361816	5.252	5.273	4.699
11.377818	5.268	5.205	4.71
11.407171	5.212	5	4.709
11.394427	5.195	5.032	4.695
11.450542	5.005	4.909	4.696
11.35953	4.99	4.93	4.629
11.462662	4.932	4.554	4.668
11.441612	4.937	4.805	4.481
11.334818	4.729	4.541	4.74
11.394909	4.807	4.57	4.819
11.287395	4.632	4.659	4.703
11.293473	4.516	4.704	4.683
11.349083	4.642	4.858	4.302
11.40535	4.65	4.728	4.401
11.406178	4.764	4.843	4.465
11.433041	4.753	4.843	4.443
11.478549	4.732	4.761	4.529
11.461007	4.646	4.757	4.456
11.348223	4.945	4.705	4.475
11.384845	4.907	4.844	4.508
11.266851	4.776	4.843	4.659
11.246872	4.745	4.727	4.51
11.215383	4.479	4.706	4.639
11.178205	4.527	4.762	4.772
11.307889	4.464	4.646	4.776
11.276185	4.67	4.549	4.573
11.254773	4.578	4.489	4.767
11.326557	4.477	4.682	4.612
11.376735	4.437	4.698	4.549
11.378402	4.433	4.75	4.589
11.351115	4.492	4.55	4.606
11.376307	4.354	4.63	4.52
11.36552	4.464	4.683	4.47
11.380183	4.226	4.586	4.566
11.335354	4.4	4.568	4.351
11.367751	4.388	4.547	4.445
11.264232	4.381	4.548	4.256
11.408261	4.324	4.51	4.329
11.341632	4.298	4.641	4.471
11.34173	4.122	4.565	4.608
11.473891	4.3	4.535	4.53
11.348716	4.174	4.489	4.611
11.354226	4.132	4.553	4.405
11.363061	4.315	4.575	4.475
11.34013	4.294	4.469	4.442
11.26344	4.222	4.433	4.361
11.329908	4.238	4.391	4.422
11.399452	4.26	4.473	4.411
11.367634	4.476	4.386	4.569
11.335072	4.443	4.624	4.462
11.346711	4.511	4.506	4.441
11.386385	4.344	4.604	4.233
11.382001	4.473	4.616	4.352
11.383061	4.289	4.589	4.353
11.326797	4.354	4.716	4.482
11.332789	4.25	4.604	4.476
11.381738	4.395	4.45	4.415
11.367687	4.41	4.545	4.449
11.336793	4.392	4.442	4.469
11.312145	4.598	4.387	4.389
11.386877	4.696	4.503	4.501
11.466481	4.501	4.472	4.369
11.438545	4.493	4.541	4.556
11.446392	4.371	4.416	4.669
11.462835	4.381	4.385	4.524
11.353546	4.331	4.552	4.559
11.38459	4.343	4.492	4.643
11.464354	4.491	4.598	4.555
11.500088	4.373	4.526	4.626
11.478508	4.457	4.465	4.618
11.537302	4.394	4.507	4.547
11.53745	4.423	4.643	4.533
11.561532	4.521	4.581	4.47
11.490677	4.599	4.503	4.343
11.527458	4.631	4.546	4.297
11.560179	4.782	4.452	4.327
11.431248	4.601	4.531	4.422
11.57904	4.616	4.494	4.409
11.382722	4.496	4.378	4.385
11.433432	4.596	4.509	4.589
11.317151	4.552	4.646	4.647
11.268374	4.612	4.261	4.427
11.241865	4.502	4.459	4.451
11.132843	4.597	4.655	4.376
11.381185	4.689	4.662	4.5
11.323867	4.551	4.483	4.492
11.360056	4.527	4.516	4.705
11.185725	4.384	4.378	4.735
11.203788	4.501	4.413	4.432
11.247956	4.815	4.32	4.492
11.40322	4.634	4.173	4.647
11.337331	4.85	4.509	4.746
11.363555	4.632	4.576	4.628
11.43211	4.553	4.466	4.564
11.430766	4.511	4.585	4.589
11.338354	4.338	4.328	4.712
11.334062	4.398	4.224	4.557
11.321435	4.364	4.255	4.266
11.387981	4.573	4.112	4.524
11.391558	4.624	4.27	4.394
11.425871	4.502	4.477	4.44
11.565321	4.536	4.539	4.29
11.42431	4.651	4.496	4.33
11.388554	4.735	4.329	4.347
11.433109	4.501	4.484	4.301
11.310802	4.522	4.37	4.271
11.365369	4.339	4.46	4.08
11.337513	4.37	4.606	4.226
11.357145	4.588	4.588	4.319
11.358193	4.712	4.428	4.331
11.342112	4.834	4.489	4.476
11.318849	4.831	4.393	4.345
11.305013	4.725	4.319	4.441
11.166251	4.591	4.304	4.449
11.280704	4.665	4.363	4.315
11.329369	4.714	4.348	4.396
11.345224	4.749	4.371	4.523
11.267837	4.613	4.413	4.541
11.383034	4.761	4.203	4.537
11.358339	4.729	4.154	4.493
11.37877	4.701	4.419	4.62
11.410411	4.68	4.382	4.318
11.456874	4.557	4.416	4.469
11.38422	4.74	4.286	4.327
11.364465	4.677	4.414	4.411
11.126793	4.621	4.267	4.483
11.315104	4.85	4.392	4.439
11.298937	4.871	4.25	4.376
11.425333	4.902	4.222	4.71
11.352697	4.692	4.348	4.603
11.448035	4.417	4.299	4.48
11.365841	4.738	4.271	4.526
11.382874	4.591	4.52	4.347
11.393726	4.38	4.541	4.407
11.348613	4.627	4.414	4.287
11.275031	4.514	4.4	4.432
11.353238	4.272	4.481	4.365
11.260123	4.625	4.192	4.522
11.318218	4.516	4.422	4.505
11.348302	4.559	4.458	4.4
11.375225	4.663	4.605	4.321
11.365137	4.471	4.496	4.237
11.306546	4.616	4.446	4.317
11.3479	4.508	4.335	4.458
11.318082	4.512	4.583	4.331
11.418724	4.698	4.742	4.191
11.448563	4.534	4.746	4.463
11.490706	4.563	4.677	4.513
11.549229	4.522	4.5	4.565
11.456818	4.608	4.665	4.562
11.393522	4.592	4.548	4.562
11.379103	4.534	4.555	4.698
11.351913	4.465	4.62	4.508
11.311994	4.572	4.652	4.494
11.37641	4.507	4.646	4.626
11.406631	4.439	4.772	4.623
11.330729	4.441	4.69	4.558
11.302488	4.566	4.728	4.616
11.332888	4.537	4.592	4.596
11.332742	4.456	4.657	4.604
11.244367	4.501	4.832	4.481
11.390307	4.559	4.62	4.504
11.37805	4.473	4.511	4.433
11.346294	4.511	4.476	4.374
11.408984	4.568	4.491	4.195
11.386175	4.574	4.429	4.347
11.347413	4.669	4.426	4.321
11.24832	4.609	4.686	4.335
11.364276	4.569	4.723	4.244
11.430985	4.543	4.68	4.233
11.408055	4.47	4.532	4.232
11.458535	4.371	4.445	4.146
11.465038	4.378	4.509	4.15
11.364441	4.273	4.659	4.372
11.368968	4.444	4.598	4.376
11.420132	4.381	4.473	4.587
11.491351	4.37	4.307	4.625
11.416558	4.526	4.355	4.56
11.456287	4.225	4.441	4.571
11.381064	4.053	4.466	4.648
11.379393	4.126	4.541	4.5
11.404605	4.213	4.6	4.547
11.402662	4.185	4.502	4.676
11.454174	4.296	4.568	4.641
11.492519	4.305	4.535	4.713
11.421687	4.224	4.615	4.658
11.382843	4.483	4.69	4.696
11.301229	4.361	4.493	4.634
11.321583	4.284	4.455	4.524
11.357108	4.423	4.438	4.76
11.403593	4.393	4.371	4.595
11.482814	4.352	4.4	4.708
11.380505	4.515	4.443	4.57
11.412664	4.419	4.549	4.609
11.488657	4.499	4.41	4.839
11.502039	4.465	4.373	4.65
11.374596	4.536	4.307	4.678
11.358936	4.543	4.247	4.675
11.444945	4.698	4.344	4.609
11.422013	4.61	4.5	4.565
11.504143	4.719	4.428	4.614
11.385181	4.553	4.505	4.581
11.644003	4.696	4.331	4.531
11.459651	4.487	4.251	4.577
11.543944	4.569	4.459	4.495
11.358401	4.495	4.438	4.491
11.499425	4.33	4.573	4.572
11.544709	4.598	4.414	4.423
11.580928	4.392	4.49	4.421
11.425013	4.428	4.567	4.367
11.41214	4.432	4.461	4.429
11.294189	4.42	4.418	4.45
11.44273	4.425	4.491	4.304
11.470696	4.541	4.48	4.231
11.494692	4.63	4.42	4.424
11.450159	4.595	4.326	4.521
11.44404	4.709	4.344	4.445
11.361881	4.612	4.457	4.558
11.305298	4.52	4.346	4.447
11.314803	4.622	4.44	4.278
11.362728	4.72	4.389	4.203
11.377948	4.654	4.423	4.128
11.271655	4.772	4.327	4.303
11.307859	4.758	4.516	4.265
11.473591	4.532	4.655	4.197
11.487171	4.423	4.703	4.442
11.482908	4.461	4.721	4.354
11.402555	4.593	4.602	4.521
11.45234	4.739	4.403	4.422
11.434001	4.823	4.571	4.537
11.323749	4.691	4.541	4.63
11.398672	4.549	4.503	4.633
11.390204	4.695	4.417	4.712
11.399382	4.767	4.415	4.565
11.35851	4.643	4.417	4.63
11.304117	4.791	4.398	4.536
11.322791	4.895	4.433	4.479
11.341397	4.746	4.351	4.534
11.319504	4.746	4.553	4.527
11.395494	4.829	4.504	4.533
11.402385	4.978	4.67	4.523
11.465322	4.77	4.723	4.452
11.406372	4.773	4.679	4.384
11.411906	4.862	4.543	4.203
11.368664	4.796	4.683	4.524
11.386309	4.664	4.568	4.587
11.299199	4.597	4.542	4.49
11.366783	4.71	4.386	4.499
11.421695	4.576	4.174	4.535
11.385919	4.688	4.201	4.29
11.458888	4.579	4.341	4.328
11.476245	4.358	4.401	4.418
11.459839	4.419	4.21	4.367
11.440643	4.444	4.426	4.357
11.37954	4.354	4.519	4.511
11.407601	4.233	4.472	4.26
11.247243	4.349	4.518	4.538
11.285276	4.471	4.447	4.459
11.363815	4.374	4.47	4.276
11.31227	4.429	4.435	4.236
11.301222	4.331	4.382	4.412
11.30976	4.401	4.442	4.299
11.336217	4.454	4.452	4.296
11.412444	4.283	4.456	4.251
11.42888	4.492	4.78	4.285
11.371561	4.346	4.509	4.275
11.491797	4.409	4.622	4.328
11.457675	4.273	4.779	4.276
11.46613	4.255	4.874	4.395
11.352755	4.246	4.945	4.458
11.362527	4.673	4.759	4.51
11.491504	4.359	4.718	4.665
11.600581	4.83	4.58	4.543
11.57091	4.784	4.589	4.593
11.565417	4.475	4.786	4.656
11.571858	4.507	4.754	4.657
11.506882	4.365	4.68	4.506
11.490531	4.269	4.643	4.529
11.542441	4.198	4.736	4.581
11.531946	4.438	4.643	4.576
11.50929	4.381	4.591	4.486
11.436698	4.387	4.516	4.393
11.413941	4.452	4.514	4.442
11.361571	4.356	4.533	4.326
11.355248	4.596	4.538	4.436
11.353733	4.298	4.561	4.377
11.391002	4.398	4.528	4.476
11.32409	4.342	4.615	4.374
11.24664	4.335	4.695	4.448
11.403824	4.251	4.34	4.521
11.312353	4.381	4.44	4.571
11.306879	4.465	4.529	4.396
11.311281	4.459	4.496	4.468
11.273297	4.862	4.493	4.511
11.330474	4.583	4.489	4.45
11.317829	4.477	4.662	4.5
11.262852	4.502	4.61	4.572
11.337667	4.421	4.428	4.718
10.815521	4.803	4.669	4.57
10.786437	4.498	4.599	4.538
10.852978	4.614	4.576	4.578
10.839717	4.533	4.598	4.396
10.899225	4.528	4.418	4.246
10.783341	4.326	4.229	4.56
10.841764	4.395	4.304	4.496
10.757588	4.525	4.34	4.607
10.757825	4.108	4.224	4.215
10.850212	4.279	3.981	4.234
10.909495	4.326	4.067	4.146
10.874095	4.096	4.255	4.163
10.833422	4.089	4.227	4.012
10.871042	4.121	4.214	3.923
10.912288	4.057	4.201	4.155
10.848154	4.02	4.329	4.199
10.791106	3.974	4.133	4.165
10.853275	4.148	4.284	4.22
10.873802	4.035	4.292	4.312
10.827606	4.195	4.317	3.985
10.856329	4.015	4.204	4.153
10.832176	4.023	4.186	4.146
10.834716	4.02	4.204	4.275
10.916759	4.082	3.97	4.262
10.838689	4.122	3.909	4.095
10.853054	4.082	4.055	4.115
10.796133	4.077	3.863	4.207
10.87171	4.153	3.779	4.347
10.867446	3.924	3.873	4.487
10.799415	3.899	3.821	4.313
10.980174	3.93	3.832	4.278
10.890478	4.032	3.767	4.184
10.889487	4.095	3.715	4.123
10.862127	4.308	3.795	4.029
10.807089	4.393	3.926	3.952
10.833809	4.288	3.816	3.994
10.790889	4.286	3.956	4.13
10.870643	4.238	4.042	4.252
10.774527	4.278	3.906	4.017
10.846667	4.42	3.955	3.902
10.791286	4.257	4.005	3.996
10.855466	4.229	4.069	4.225
10.875548	4.345	3.955	4.058
10.860866	4.296	4.071	3.966
10.805587	4.273	4.006	4.219
10.851229	4.347	3.958	4.317
10.89029	4.348	4.059	4.284
10.890166	4.269	4.148	4.226
10.830489	4.212	3.947	4.147
10.805292	4.132	4.021	4.342
10.872749	4.237	4.073	4.435
10.905017	4.443	4.109	4.157
10.918177	4.373	4.057	4.221
10.862668	4.297	4.207	4.262
10.85114	4.237	4.22	3.994
10.877295	4.094	4.139	4.152
10.861344	4.401	4.134	4.229
10.831171	4.304	4.135	4.259
10.838356	4.748	4.046	4.185
10.909719	4.311	3.93	4.265
10.83837	4.355	4.063	4.304
10.864718	4.281	3.906	4.103
10.704847	4.273	3.972	4.091
10.863211	4.332	3.997	4.198
10.858504	4.231	3.623	4.061
10.907444	4.183	3.819	4.139
10.779629	4.176	3.954	4.15
10.828937	4.1	3.91	4.172
10.88403	4.169	3.942	4.15
10.837526	4.105	3.845	3.974
10.857223	4.243	3.988	4.035
10.783563	4.079	3.876	4.166
10.769233	4.164	3.976	4.224
10.801878	4.259	4.058	4.248
10.799129	4.202	4.119	4.182
10.873051	4.385	4.066	4.243
10.831319	4.348	4.2	4.251
10.876052	4.33	4.133	4.165
10.948582	4.181	4.042	4.385
10.946786	4.281	4.151	4.15
10.928022	4.052	4.175	4.139
10.93579	4.06	4.226	4.21
10.980315	4.136	4.088	4.089
10.89256	4.08	3.912	4.102
10.837643	3.963	3.731	4.058
10.913568	4.266	4.048	4.2
10.840824	4.293	4.104	4.255
10.820994	4.171	4.038	4.293
10.87895	4.27	3.974	4.148
10.904462	4.178	4.047	4.302
10.802522	4.028	3.978	4.127
10.891083	4.102	3.917	4.055
10.816387	4.272	4.007	4.195
10.73245	4.345	3.984	4.145
10.830923	4.158	3.903	4.137
10.8481	4.069	4.037	4.076
10.76254	4.18	3.93	3.93
10.896407	4.223	3.845	4.122
10.816656	4.09	4.075	3.973
10.77692	4.053	4.001	4
10.820382	4.155	4.144	4.275
10.765011	4.182	4.006	3.996
10.795828	4.136	4.285	4.408
10.780535	4.032	4.168	4.295
10.721818	3.948	4.171	4.227
10.773434	3.904	4.19	4.133
10.771095	4.088	4.266	4.153
10.751486	3.886	4.12	4.222
10.773379	4.17	4.161	4.04
10.82462	4.569	4.176	4.311
10.811939	3.983	4.342	4.239
10.795956	4.711	4.484	4.377
10.810878	3.989	4.118	4.366
10.788584	4.152	4.003	4.238
10.849462	3.97	4.081	4.391
10.85272	3.905	4.142	4.368
10.834091	3.867	4.092	4.304
10.831236	3.815	4.028	4.283
10.85915	3.755	3.986	4.282
10.801144	4.561	4.059	4.332
10.829173	3.914	4.025	4.192
10.894105	3.78	4.081	4.119
10.905781	4.212	4.197	4.114
10.860122	3.903	4.059	4.037
10.752928	3.7	4.101	3.993
10.840998	3.791	4.048	4.091
10.895696	4.01	4.05	3.961
10.898818	4.256	4.066	3.957
10.891872	4.012	4.167	3.849
10.877349	3.992	4.142	3.813
10.760754	3.847	4.209	3.939
10.81001	3.81	4.061	3.784
10.783395	3.836	4.172	3.795
10.870947	4.034	4.077	3.999
10.839598	3.995	4.226	4.039
10.812831	3.987	4.136	3.922
10.826672	3.978	4.232	3.793
10.903864	3.987	3.863	4.027
10.91159	4.062	4.047	3.685
10.756368	3.9	4.334	3.958
10.832109	3.812	4.283	4.039
10.898913	3.915	4.166	3.831
10.859585	4.016	3.999	3.882
10.873876	4.035	4.064	4.081
10.858797	3.827	4.213	4.144
10.897045	4.056	4.129	4.245
10.874296	4.112	4.308	4.226
10.869694	4.131	4.184	4.156
10.917759	4.18	4.083	4.225
10.783985	4.172	4.066	4.26
10.91277	4.201	4.227	4.233
10.927249	4.192	4.313	4.099
10.810398	4.385	4.198	4.014
10.815866	4.329	4.034	4.143
10.811554	4.231	4.307	4.165
10.772031	4.245	4.138	4.132
10.806628	4.261	4.12	4.081
10.773749	4.244	4.244	4.197
10.836773	4.436	4.359	4.207
10.818054	4.178	4.38	4.132
10.851332	4.185	4.441	4.194
10.902768	4.321	4.383	4.128
10.893771	4.12	4.096	4.157
10.938537	4.236	4.142	4.14
10.984396	4.031	4.349	4.213
10.983046	3.946	4.186	3.985
10.890614	4.282	4.002	4.072
10.825232	4.193	3.957	4.107
10.835425	4.191	3.902	4.127
10.833957	4.279	3.849	4.185
10.861473	4.328	3.872	3.953
10.838314	4.282	3.92	3.884
10.855899	4.387	3.987	3.891
10.919681	4.434	4.047	3.947
10.861997	4.336	4.078	4.11
10.889799	4.296	3.983	4.159
10.811645	4.102	4.174	3.938
10.844022	4.219	4.216	4.026
10.756234	4.339	4.303	4.002
10.853716	4.43	4.287	3.917
10.858412	4.508	4.218	4.025
10.858275	4.455	4.286	3.872
10.897853	4.503	4.431	3.86
10.862046	4.338	4.268	4.077
10.837261	4.399	4.311	4.089
11.044711	4.308	4.176	4.095
10.995489	4.406	4.036	3.97
10.922972	4.41	3.901	3.819
10.907936	4.387	3.939	3.976
10.860099	4.302	3.951	3.897
10.90754	4.336	4.078	3.785
10.821056	4.422	4.122	3.957
10.789559	4.322	4.077	3.748
10.902317	4.256	4.102	4.045
10.811974	4.155	4.152	3.972
10.840348	4.293	4.038	4.187
10.80613	4.276	4.175	3.855
10.828554	3.997	4.145	4.126
10.788945	4.073	4.251	4.056
10.845489	4.29	4.24	4.001
10.888697	4.239	4.244	3.915
10.784396	4.332	4.196	4.02
10.770791	4.325	4.119	4.198
10.751768	4.296	4.159	4.05
10.78986	4.4	4.086	4.056
10.846265	4.264	4.101	4.061
10.862578	4.28	4.12	4.089
10.883528	4.243	4.197	4.108
10.902559	4.282	4.426	4.28
10.849872	4.139	4.259	4.414
10.941969	4.095	4.26	4.33
10.909113	4.353	4.229	4.288
10.964074	4.07	4.393	4.304
11.004158	4.295	4.25	4.16
10.924947	4.34	4.261	4.174
10.798168	4.329	4.189	4.215
10.960675	4.261	4.143	4.191
10.859543	4.334	4.279	4.278
10.79802	4.078	4.168	4.351
10.901918	4.127	4.176	4.183
10.794292	4.198	4.168	4.267
10.843026	4.2	4.228	3.996
10.829918	4.051	4.205	4.19
10.882482	3.79	4.354	4.249
10.884656	3.925	4.439	4.227
10.900616	4.048	4.288	4.238
10.969513	3.944	4.03	4.252
11.002709	4.089	4.257	4.179
10.877132	4.011	4.204	4.007
10.777264	4.026	4.228	3.973
10.926498	4.205	4.466	4.131
10.858369	4.19	4.339	4.042
10.838719	4.037	4.195	4.196
10.851368	4.152	4.089	4.129
10.843928	3.967	4.176	4.223
10.893234	4.038	4	4.214
10.800074	3.961	4.169	4.075
10.858162	3.987	4.278	4.071
10.908375	4.172	4.229	4.047
10.893065	4.134	4.166	4.186
10.923694	4.305	4.009	4.042
10.977477	4.261	4.002	3.985
10.903897	4.405	3.975	3.9
10.981397	4.284	3.988	4.026
10.890841	4.165	4.04	3.923
10.866793	4.241	4.106	3.948
10.842115	4.274	4.142	3.96
10.89966	4.181	4.034	4.064
10.884281	3.933	4.156	4.028
10.935132	3.945	4.234	4.171
10.884329	3.907	4.489	4.378
10.95532	3.841	4.178	4.021
10.89388	3.786	4.181	4.008
10.945938	3.846	4.267	3.828
10.926322	3.804	4.295	3.862
10.924858	3.935	4.213	3.936
10.937595	3.89	4.406	4.016
10.855065	3.897	4.169	4.085
10.836417	4.168	4.096	4.103
10.872414	4.146	4.183	4.092
10.94108	4.24	4.159	3.997
10.837044	4.12	4.004	4.136
10.947698	4.125	4.264	3.943
10.984558	4.225	4.061	4.09
10.96593	4.147	4.122	4.05
10.942767	4	4.111	4.175
10.87719	4.116	4.141	3.992
10.941636	4.069	3.991	4.141
10.880859	4.275	4.102	4.041
10.867193	4.022	4.047	4.061
10.815915	4.12	3.981	4.308
10.849525	4.146	4.243	4.313
10.874209	4.18	4.243	4.394
10.947239	4.206	4.263	4.198
10.961069	4.175	4.354	4.248
10.93265	4.136	4.354	3.996
10.828252	4.23	4.477	4.278
10.91353	4.36	4.452	4.229
10.968447	4.23	4.38	4.394
10.828659	4.324	4.497	4.209
10.927249	4.29	4.424	4.173
10.87361	4.373	4.378	4.386
10.797693	4.217	4.397	4.228
10.813132	4.193	4.398	4.035
10.784792	4.193	4.423	4.166
10.715279	4.182	4.313	4.14
10.821279	4.279	4.304	4.155
10.890169	4.359	4.363	4.193
10.781694	4.224	4.274	4.227
10.85183	4.345	4.145	4.023
10.782866	4.18	4.327	4.15
10.782366	4.173	4.368	4.054
10.859195	4.222	4.226	4.108
10.913732	4.246	4.112	4.021
10.92199	4.256	4.03	4.027
10.810404	3.983	4.222	4.018
10.774918	4.233	4.201	4.131
10.914405	4.284	3.985	
10.81643	4.502	4.19	3.788
10.882719	4.452	4.333	3.915
10.34069	4.33	4.303	4.083
10.34069	4.383	4.276	3.801
10.392847	4.391	4.254	3.936
10.345026	4.285	4.261	3.974
10.401282	4.132	4.191	3.927
10.394542	4.06	4.098	3.957
10.409012	4.283	3.866	4.093
10.404871	4.234	3.971	3.885
10.446203	4.219	4.129	4.185
10.366153	4.319	4.163	4.009
10.383918	4.041	4.251	3.93
10.415075	4.063	4.056	3.885
10.313724	4.136	3.745	3.894
10.315568	4.028	3.99	4.198
10.305895	4.069	3.89	4.05
10.451742	3.962	3.903	4.138
10.465108	3.801	4.084	4.093
10.379078	4.002	3.93	3.906
10.427219	4.027	3.956	4.061
10.378242	3.988	3.775	4.064
10.384858	3.966	3.816	4.129
10.410927	3.84	3.743	4.018
10.471193	3.83	3.703	4.066
10.427276	3.973	3.792	4.106
10.433315	3.847	3.857	3.999
10.332394	3.958	3.84	3.937
10.393133	3.678	3.88	3.987
10.383862	3.78	3.885	4.012
10.355717	3.838	3.911	3.837
10.300901	3.781	3.89	3.885
10.399904	3.799	3.883	3.742
10.451871	3.79	3.993	3.88
10.470007	3.87	3.726	4.001
10.415712	3.883	3.898	3.845
10.37487	3.809	3.96	4.046
10.533321	3.761	4.004	4.169
10.468037	3.654	3.87	4.111
10.461996	3.615	3.919	3.925
10.474588	3.763	4.006	4.02
10.559112	3.706	3.948	4.094
10.590423	3.954	3.931	3.968
10.523105	4.065	4.201	3.967
10.501843	4.202	3.963	3.995
10.460823	3.944	3.875	3.876
10.604005	3.959	4.045	3.927
10.457102	3.996	3.989	3.768
10.524155	3.823	3.832	3.566
10.534127	3.776	3.852	3.532
10.527455	3.887	3.914	3.661
10.521822	3.749	4.025	3.482
10.593238	3.69	4.007	3.483
10.442707	3.653	3.939	3.685
10.510694	3.586	3.91	3.611
10.433881	3.649	3.784	3.846
10.495164	3.573	3.807	3.708
10.406664	3.594	3.966	3.486
10.540346	3.656	3.77	3.684
10.542168	3.465	3.823	3.595
10.458676	3.803	3.847	3.834
10.426265	3.685	3.919	3.524
10.522217	3.702	3.964	3.491
10.489652	3.778	3.988	3.814
10.371506	3.59	3.953	3.558
10.390553	3.51	3.831	3.518
10.494463	3.668	3.75	3.481
10.455097	3.695	3.65	3.456
10.391291	3.666	3.879	3.462
10.350965	3.779	3.854	3.394
10.293929	3.719	3.917	3.583
10.275089	3.818	3.811	3.486
10.380627	3.77	3.668	3.422
10.543722	3.71	3.885	3.667
10.545409	3.804	4.016	3.628
10.532991	3.684	3.65	3.844
10.453759	3.759	3.736	3.869
10.484182	3.824	3.774	3.906
10.511696	3.605	3.847	3.966
10.47995	3.613	3.823	3.907
10.483096	3.613	3.856	3.782
10.608523	3.764	3.856	3.882
10.638664	3.72	3.922	3.93
10.587139	3.685	3.862	3.692
10.587826	3.606	3.649	3.853
10.570727	3.85	3.877	3.685
10.580754	3.798	3.884	3.669
10.635422	3.878	4.022	3.861
10.588336	3.897	3.857	3.804
10.588119	3.901	3.823	3.697
10.68506	3.93	3.869	3.732
10.584953	3.837	3.858	3.761
10.538679	3.896	3.831	3.715
10.533305	3.841	3.947	3.822
10.643821	3.615	3.922	3.678
10.671649	3.647	3.871	3.851
10.666374	3.69	4.031	3.766
10.585189	3.912	4.029	3.838
10.578785	3.703	4.159	3.882
10.547973	3.628	4.204	3.947
10.612991	3.642	4.051	3.893
10.555217	3.688	3.955	3.955
10.595616	3.599	3.837	3.868
10.613071	3.648	3.96	4.138
10.621353	3.632	3.851	3.984
10.656056	3.881	3.799	4.136
10.732092	3.948	3.623	4.079
10.576833	3.76	3.844	4.02
10.515517	3.844	3.591	3.872
10.619229	4.368	3.544	3.767
10.587497	4.032	3.701	3.754
10.523344	4.098	3.916	3.819
10.456687	3.877	3.904	4.019
10.573926	3.838	3.698	3.889
10.623426	3.789	3.782	3.948
10.547359	3.786	3.709	4.057
10.590156	3.79	3.853	4.082
10.652674	3.771	3.588	4.118
10.592446	3.872	3.705	4.011
10.509305	3.769	3.712	3.841
10.542905	3.771	3.919	3.817
10.600542	3.721	3.871	3.866
10.614724	3.632	3.786	3.803
10.587638	3.565	3.745	3.995
10.609237	3.525	3.69	4.071
10.588177	3.404	3.866	4.004
10.512957	3.422	3.761	3.943
10.534593	3.309	3.804	4.2
10.548981	3.475	3.854	4.226
10.490382	3.514	3.835	4.083
10.495414	3.41	4.018	3.86
10.509676	3.548	4.02	3.901
10.511771	3.495	4.121	3.631
10.554306	3.594	4.015	3.801
10.534561	3.592	3.95	3.847
10.548084	3.794	3.846	3.848
10.406239	3.595	4.044	3.754
10.466654	3.534	4.067	3.671
10.468967	3.627	4.069	3.695
10.590696	3.713	3.904	3.811
10.620288	3.477	3.822	3.527
10.607999	3.585	4.035	3.648
10.630156	3.667	3.937	3.659
10.632466	3.786	4.078	3.506
10.59266	3.715	3.992	3.554
10.569856	3.801	3.961	3.527
10.718558	3.897	4.23	3.645
10.647209	3.602	4.103	3.787
10.612795	3.787	4.185	3.577
10.678093	3.785	4.068	3.815
10.65071	3.873	4.212	3.547
10.659459	3.943	3.898	3.724
10.697488	3.938	4.115	3.654
10.632758	3.797	4.071	3.608
10.592019	3.807	3.91	3.453
10.615236	3.861	3.854	3.566
10.669765	4.008	3.987	3.721
10.648477	3.705	4.044	3.71
10.674931	3.768	3.89	3.84
10.571348	3.897	4.002	3.713
10.641921	3.91	3.895	3.915
10.668991	3.981	3.861	3.693
10.659413	3.789	3.779	3.61
10.612135	3.911	3.861	3.671
10.557876	3.94	3.955	3.533
10.558391	3.957	4.093	3.518
10.636443	3.894	3.919	3.691
10.600803	3.852	3.893	3.651
10.586156	3.888	3.917	3.935
10.637122	3.653	3.805	3.711
10.591605	3.751	3.541	3.946
10.638653	3.83	3.971	3.894
10.668133	3.851	3.927	3.727
10.684781	3.918	3.851	3.776
10.651702	3.832	3.884	3.731
10.667093	3.898	3.906	3.837
10.723898	3.85	3.947	3.738
10.775546	3.933	4	3.79
10.689312	3.982	3.979	3.738
10.672941	3.992	4.082	3.811
10.591267	3.811	4.137	3.692
10.536006	3.861	4.177	3.636
10.647563	3.76	4.136	3.774
10.653535	3.782	4.128	3.73
10.655706	3.803	4.226	3.721
10.667605	3.739	4.196	3.644
10.597464	3.743	4.239	3.82
10.606495	3.91	4.234	3.874
10.571197	3.966	3.955	3.926
10.630228	3.956	4.015	3.864
10.642454	3.859	4.027	3.828
10.698238	3.919	4.069	3.984
10.704199	3.867	3.873	3.92
10.745121	3.865	3.98	3.828
10.672719	3.847	4.138	3.776
10.703016	3.806	4.046	3.882
10.642182	3.837	3.944	3.914
10.65164	3.84	4.091	4.03
10.543668	3.939	4.161	3.981
10.664653	4.106	4.167	3.925
10.699363	3.924	3.986	3.941
10.661826	3.957	3.992	3.923
10.633624	4.009	4.022	3.964
10.633066	3.841	3.969	3.793
10.598234	4.01	4.059	3.784
10.612981	3.776	4.087	3.699
10.716716	3.835	4.138	3.873
10.711618	3.775	3.97	3.752
10.654277	3.893	4.012	3.564
10.691577	3.936	3.724	3.851
10.739609	4.073	3.941	3.782
10.736515	3.857	3.837	3.757
10.632473	3.851	3.946	3.755
10.655055	3.91	4.051	3.783
10.719952	3.818	3.912	3.63
10.638257	3.728	4.12	3.606
10.647316	3.918	4.067	3.704
10.588131	3.801	4.249	3.666
10.633569	3.846	4.177	3.835
10.588876	3.758	4.131	3.954
10.562937	3.737	4.127	3.652
10.609263	3.768	3.936	3.584
10.570071	3.991	3.975	3.638
10.62769	3.903	3.78	3.611
10.631208	3.894	4.003	3.75
10.673396	3.785	4.093	3.569
10.607997	3.77	4.177	3.859
10.601076	3.87	4.221	3.81
10.597463	3.877	4.168	3.734
10.610419	4.042	4.291	3.872
10.630253	3.823	3.982	3.823
10.629934	3.964	4.081	3.837
10.690844	3.949	4.085	3.907
10.665907	4.123	4.179	4.084
10.688916	3.943	4.101	3.988
10.596773	3.99	3.898	4.078
10.653922	3.982	3.996	3.898
10.733846	3.933	3.982	3.846
10.666291	3.997	3.825	3.928
10.689341	3.703	3.793	3.944
10.585993	3.685	3.969	3.99
10.671288	3.84	3.965	4.002
10.654751	3.873	3.815	3.978
10.698917	3.883	3.739	4.137
10.654035	3.982	3.79	4.151
10.631634	3.994	3.825	4.078
10.601712	3.913	3.78	4.144
10.541622	3.858	3.832	4.058
10.579414	3.813	3.86	3.96
10.668698	3.796	3.734	4.013
10.580576	3.874	3.687	3.865
10.545034	3.655	3.755	3.902
10.60379	3.764	3.726	3.969
10.551721	3.814	3.925	3.826
10.656148	3.949	3.962	3.819
10.708296	3.899	3.896	3.715
10.670149	3.796	3.883	3.682
10.674014	3.724	3.741	3.493
10.670467	3.811	3.704	3.688
10.660979	3.789	3.793	3.615
10.765055	3.782	3.797	3.237
10.708716	3.807	3.673	3.348
10.698307	3.962	3.837	3.371
10.676796	3.892	3.869	3.451
10.700948	3.857	3.9	3.469
10.661817	3.883	3.905	3.452
10.708595	4.028	3.99	3.672
10.732512	3.841	4.049	3.906
10.683315	3.783	3.829	3.806
10.687366	3.823	3.929	3.753
10.690681	3.774	3.858	3.58
10.740844	3.655	4.002	3.756
10.748943	3.876	4.065	3.735
10.718578	4.046	3.905	3.743
10.728997	3.892	3.773	3.715
10.746954	3.938	4.052	3.763
10.769295	3.886	3.937	3.903
10.819069	3.866	4.079	3.864
10.793727	3.891	3.982	3.812
10.767292	3.882	4.051	3.986
10.744683	3.837	4.054	4.045
10.731024	3.726	4.183	4.056
10.656768	3.803	4.339	3.977
10.652954	3.785	4.156	3.974
10.615891	3.757	4.021	4.086
10.700399	3.847	4.063	4.006
10.600275	3.763	4.079	3.943
10.70468	3.709	4.003	3.855
10.762083	3.691	4.043	3.754
10.744445	3.841	4.044	3.758
10.678741	3.89	3.99	3.581
10.643041	3.872	3.987	3.888
10.541903	3.76	3.766	3.557
10.533183	3.688	3.934	3.542
10.652141	3.883	3.914	3.622
10.629561	3.957	3.962	3.624
10.651999	3.983	3.9	3.514
10.672837	3.782	4.02	3.567
10.711038	3.998	4.049	3.689
10.722575	4.021	3.808	3.564
10.744149	3.813	3.915	3.613
10.699825	3.698	4.058	3.802
10.735077	3.82	3.9	3.922
9.625242	3.917	3.844	3.737
9.622412	4.454	3.916	3.81
9.704811	3.763	3.892	3.925
9.628693	3.765	3.926	3.785
9.643384	3.836	3.926	3.873
9.60815	3.82	3.941	3.708
9.648414	3.912	4.076	3.69
9.640201	3.992	4.05	3.835
9.667151	3.774	3.936	3.681
9.648772	3.645	3.984	3.653
9.646164	3.754	3.858	3.64
9.623279	3.606	3.852	3.631
9.657064	3.769	3.778	3.575
9.62352	3.572	3.927	3.634
9.620522	3.49	3.929	3.522
9.637644	3.725	4.154	3.673
9.653417	3.641	4.079	3.733
9.49954	3.862	3.944	3.659
9.50508	3.677	3.893	3.631
9.610877	3.512	3.775	3.562
9.566751	3.487	3.843	3.365
9.589503	3.385	3.827	3.517
9.584773	3.566	3.712	3.419
9.549962	3.522	3.814	3.41
9.476886	3.187	3.668	3.455
9.509971	3.33	3.615	3.622
9.553231	3.581	3.509	3.291
9.51649	3.513	3.701	3.173
9.623916	3.462	3.672	3.237
9.632325	3.341	3.618	3.431
9.573247	3.431	3.425	3.155
9.591568	3.492	3.629	3.099
9.573167	3.451	3.442	2.866
9.510832	3.669	3.265	2.957
9.580871	3.731	3.284	3.095
9.481123	3.7	3.228	3.185
9.610566	3.558	3.583	3.163
9.659654	3.633	3.462	3.308
9.463069	3.555	3.374	3.275
9.631744	3.572	3.485	3.306
9.640663	3.526	3.425	3.309
9.626211	3.544	3.084	3.273
9.693296	3.469	3.328	3.425
9.690789	3.2	3.352	3.26
9.653425	3.475	3.587	3.467
9.597303	3.472	3.642	3.462
9.669501	3.481	3.635	3.372
9.557287	3.288	3.53	3.509
9.592179	3.286	3.588	3.419
9.595641	3.323	3.823	3.456
9.616134	3.424	3.679	3.435
9.57184	3.45	3.605	3.339
9.590539	3.627	3.672	3.375
9.612088	3.843	3.585	3.431
9.636024	3.573	3.43	3.214
9.579216	3.617	3.428	3.039
9.66793	3.536	3.589	3.242
9.651103	3.419	3.709	3.131
9.655325	3.325	3.415	3.175
9.650754	3.402	3.411	3.426
9.642459	3.519	3.351	3.142
9.651996	3.562	3.337	3.26
9.690008	3.595	3.412	3.3
9.659822	3.535	3.4	3.394
9.682021	3.514	3.376	3.432
9.746265	3.328	3.52	3.241
9.583522	3.508	3.418	3.377
9.518769	3.642	3.347	3.16
9.647398	3.738	3.221	3.21
9.698859	3.6	3.18	3.294
9.739867	3.678	3.127	3.308
9.728525	3.718	3.23	3.145
9.659479	3.633	3.209	3.159
9.752707	3.624	3.323	3.289
9.649973	3.605	3.118	3.388
9.708176	3.598	3.147	3.425
9.683419	3.596	3.233	3.197
9.690309	3.495	3.278	3.32
9.610237	3.56	3.413	3.305
9.66353	3.412	3.497	3.314
9.668826	3.381	3.303	3.268
9.661995	3.415	3.418	3.246
9.649946	3.318	3.303	3.581
9.69773	3.361	3.374	3.647
9.64449	3.219	3.69	3.512
9.651437	3.147	3.557	3.59
9.705054	3.082	3.361	3.544
9.675136	3.145	3.368	3.555
9.732789	3.274	3.328	3.483
9.780873	3.258	3.652	3.619
9.661526	3.414	3.66	3.721
9.783111	3.272	3.607	3.502
9.680132	3.263	3.631	3.47
9.748251	3.347	3.505	3.567
9.616467	3.444	3.635	3.357
9.663764	3.287	3.645	3.329
9.608123	3.372	3.515	3.342
9.61963	3.57	3.537	3.44
9.621191	3.412	3.658	3.373
9.597769	3.476	3.798	3.651
9.638258	3.454	3.702	3.583
9.703311	3.368	3.819	3.415
9.647177	3.547	3.726	3.449
9.676931	3.262	3.636	3.342
9.610857	3.482	3.755	3.381
9.700105	3.547	3.816	3.567
9.661839	3.475	3.823	3.479
9.671488	3.963	3.696	3.474
9.691107	3.522	3.689	3.373
9.766002	3.783	3.698	3.521
9.665747	4.057	3.569	3.367
9.703656	3.743	3.381	3.35
9.775168	3.844	3.56	3.636
9.669922	3.942	3.539	3.473
9.72649	3.756	3.539	3.539
9.709056	4.12	3.67	3.401
9.755197	3.695	3.728	3.389
9.752811	3.753	3.671	3.421
9.797723	3.599	3.71	3.338
9.712309	4.315	3.684	3.562
9.729883	3.689	3.637	3.62
9.672672	3.615	3.486	3.482
9.705867	3.487	3.567	3.556
9.782941	3.468	3.472	3.416
9.74795	3.347	3.425	3.598
9.72666	3.267	3.535	3.422
9.765519	3.426	3.516	3.535
9.720137	3.28	3.378	3.507
9.751783	3.116	3.565	3.317
9.654214	3.15	3.496	3.415
9.713982	3.298	3.512	3.407
9.72662	3.159	3.24	3.405
9.702262	3.346	3.359	3.546
9.701468	3.293	3.376	3.384
9.601999	3.552	3.318	3.299
9.646625	3.585	3.201	3.326
9.640091	3.391	3.311	3.364
9.68957	3.601	3.377	3.405
9.680696	3.591	3.245	3.488
9.703421	3.671	3.179	3.234
9.737497	3.58	3.031	3.296
9.746532	3.534	3.135	3.293
9.83814	3.743	3.418	3.533
9.742173	3.631	3.247	3.392
9.68589	3.707	3.226	3.247
9.71581	3.596	3.257	3.416
9.786764	3.542	3.273	3.337
9.814344	3.562	3.27	3.304
9.733344	3.595	3.02	3.363
9.811425	3.454	3.034	3.522
9.843785	3.555	3.03	3.481
9.848751	3.433	3.232	3.478
9.843211	3.471	3.26	3.563
9.770203	3.326	3.318	3.51
9.755067	3.53	3.135	3.536
9.737661	3.342	3.146	3.505
9.789812	3.376	3.294	3.563
9.799681	3.433	3.452	3.453
9.646671	3.463	3.458	3.545
9.633459	3.458	3.449	3.444
9.773213	3.424	3.588	3.527
9.774104	3.216	3.329	3.58
9.694186	3.381	3.414	3.463
9.742321	3.309	3.16	3.363
9.715544	3.381	3.318	3.422
9.742141	3.357	3.226	3.44
9.709711	3.515	3.236	3.444
9.73233	3.563	3.293	3.326
9.807016	3.322	3.311	3.246
9.889118	3.688	3.338	3.252
9.7593	3.58	3.327	3.302
9.694398	3.546	3.225	3.194
9.708777	3.497	3.278	3.343
9.743089	3.256	3.151	3.434
9.736592	3.36	3.171	3.335
9.756145	3.422	3.236	3.252
9.827299	3.326	3.107	3.327
9.808935	3.329	3.04	3.329
9.830108	3.223	3	3.491
9.761987	3.066	2.924	3.398
9.744192	3.364	2.69	3.482
9.762013	3.546	3	3.597
9.723314	3.28	2.885	3.749
9.66736	3.445	2.834	3.685
9.652835	3.579	2.924	3.535
9.686763	3.58	2.968	3.471
9.788977	3.417	3.295	3.453
9.765513	3.409	3.162	3.454
9.79113	3.501	3.298	3.426
9.788066	3.419	3.301	3.503
9.657522	3.535	3.064	3.429
9.731456	3.385	3.134	3.437
9.695641	3.453	3.149	3.296
9.731253	3.623	3.117	3.465
9.739053	3.542	3.453	3.505
9.71628	3.608	3.417	3.494
9.699278	3.754	3.318	3.33
9.734895	3.792	3.453	3.582
9.691185	3.496	3.389	3.477
9.734792	3.701	3.475	3.673
9.799223	3.451	3.266	3.505
9.814109	3.58	3.071	3.418
9.748752	3.551	3.391	3.459
9.792271	3.667	3.469	3.551
9.801911	3.499	3.405	3.444
9.725004	3.444	3.496	3.326
9.77229	3.436	3.518	3.4
9.769365	3.237	3.48	3.295
9.845128	3.299	3.454	3.535
9.756464	3.387	3.334	3.531
9.786717	3.407	3.349	3.401
9.884035	3.376	3.488	3.34
9.865968	3.248	3.506	3.409
9.743485	3.26	3.438	3.389
9.803004	3.337	3.378	3.159
9.767708	3.405	3.574	3.224
9.725065	3.435	3.581	3.342
9.83897	3.365	3.28	3.554
9.821298	3.283	3.36	3.506
9.802834	3.463	3.423	3.399
9.786917	3.512	3.567	3.412
9.798007	3.549	3.335	3.425
9.775368	3.25	3.231	3.486
9.77308	3.205	3.338	3.553
9.808048	3.338	3.243	3.408
9.737586	3.288	3.278	3.233
9.769567	3.192	3.423	3.423
9.749152	3.268	3.643	3.39
9.772545	3.204	3.608	3.119
9.801864	3.356	3.496	3.189
9.805833	3.319	3.439	3.235
9.920819	3.513	3.399	3.445
9.808009	3.497	3.36	3.436
9.814008	3.632	3.353	3.477
9.847437	3.403	3.301	3.496
9.805265	3.457	3.432	3.584
9.811501	3.462	3.262	3.458
9.831329	3.469	3.219	3.574
9.81646	3.553	3.237	3.239
9.788138	3.337	3.272	3.245
9.862302	3.452	3.355	3.323
9.896388	3.504	3.31	3.232
9.913156	3.27	3.205	3.269
9.8615	3.47	3.431	3.157
9.899397	3.33	3.649	3.402
9.834607	3.269	3.477	3.305
9.860011	3.295	3.403	3.424
9.853874	3.175	3.492	3.303
9.869341	3.418	3.432	3.013
9.859517	3.28	3.393	3.318
9.810156	3.393	3.408	3.314
9.872858	3.336	3.329	3.275
9.858618	3.275	3.301	3.463
9.923876	3.41	3.265	3.294
9.935199	3.309	3.361	3.358
9.919005	3.48	3.285	3.249
9.857	3.659	3.171	3.319
9.732385	3.425	3.234	3.494
9.853146	3.504	3.35	3.49
9.87825	3.447	3.478	3.376
9.894685	3.325	3.236	3.41
9.829533	3.373	3.348	3.271
9.861537	3.355	3.491	3.223
9.833183	3.502	3.433	3.105
9.830699	3.448	3.629	3.352
9.816042	3.344	3.716	3.166
9.800905	3.49	3.435	3.28
9.741003	3.322	3.463	3.335
9.753336	3.32	3.594	3.403
9.898852	3.39	3.434	3.607
9.804924	3.242	3.419	3.349
9.877895	3.286	3.391	3.647
9.864523	3.295	3.436	3.471
9.810166	3.362	3.371	3.59
9.810035	3.258	3.293	3.402
9.86598	3.204	3.493	3.403
9.863661	3.281	3.478	3.327
9.891859	3.203	3.515	3.334
9.882643	3.284	3.607	3.349
9.973754	3.323	3.597	3.322
9.825206	3.337	3.44	3.248
9.881602	3.594	3.625	3.35
9.876613	3.405	3.476	3.34
9.866033	3.553	3.406	3.615
9.863378	3.34	3.434	3.673
9.836738	3.372	3.561	3.506
9.84905	3.488	3.533	3.515
9.862453	3.42	3.615	3.44
9.879899	3.401	3.554	3.528
9.878352	3.374	3.486	3.532
9.851239	3.556	3.485	3.428
9.876063	3.428	3.531	3.395
9.943266	3.513	3.592	3.454
9.999848	3.618	3.625	3.397
9.932294	3.57	3.557	3.317
9.983692	3.616	3.387	3.38
9.927063	3.619	3.45	3.323
9.9175	3.594	3.367	3.4
9.81402	3.549	3.506	3.381
9.903712	3.572	3.724	3.379
9.077165	3.473	3.443	3.322
9.099063	3.628	3.377	3.208
9.183217	3.442	3.425	3.05
9.072755	3.808	3.492	3.15
9.034149	3.901	3.506	3.212
9.043928	3.505	3.291	3.191
9.018841	3.209	3.431	3.181
9.045604	3.144	3.264	3.212
9.133784	3.432	3.493	3.274
9.047565	3.277	3.613	3.119
9.001643	3.058	3.379	3.12
9.080599	2.867	3.419	3.014
9.142741	2.928	3.575	3.029
9.113777	3.123	3.427	2.941
9.072458	3.216	3.413	3
9.077863	2.941	3.359	3.069
9.126285	3.184	3.256	3.117
9.14623	3.414	3.255	2.653
9.122751	3.29	3.188	2.551
9.053884	3.367	3.215	2.399
9.096588	3.321	3.146	2.638
9.162238	3.282	3.105	2.71
9.055839	3.041	3.125	2.567
9.05996	2.966	3.119	2.463
9.094229	2.957	3.019	2.387
9.0581	2.886	2.792	2.438
9.081877	2.681	2.806	2.546
9.107769	3.08	2.657	2.377
9.090074	3.012	2.714	2.269
9.104471	3.077	2.782	2.327
9.034224	2.793	2.969	2.225
9.100964	2.919	2.956	2.337
9.012392	2.696	2.667	2.213
9.083544	2.963	2.687	2.338
9.126461	2.947	2.722	2.339
9.156242	3.006	2.842	2.16
9.082973	3.075	2.731	2.329
9.024098	3.059	2.77	2.197
9.115075	3.012	2.651	2.127
9.007334	2.798	2.801	2.263
9.015002	2.601	2.568	2.185
9.027634	2.647	2.531	2.4
9.173776	2.519	2.462	2.495
9.096359	2.488	2.537	2.32
9.108249	2.445	2.452	2.175
9.131862	2.511	2.416	2.049
9.061634	2.236	2.325	2.072
9.120668	2.489	2.14	1.891
9.13477	2.391	2.205	2.108
9.142502	2.41	1.96	2.214
9.025236	2.159	2.096	1.996
9.012352	2.054	2.211	2.211
9.064462	2.105	2.098	2.34
9.043549	2.109	2.003	2.211
9.081376	2.203	1.91	2.479
9.110153	2.425	1.768	2.308
9.147224	2.215	1.865	2.097
9.124991	1.982	1.88	1.857
9.033222	1.978	2.106	2.119
9.083164	2.106	2.011	2.301
9.088405	2.196	2.226	2.386
8.988067	1.975	1.913	2.283
9.057466	1.823	2.14	2.343
9.036076	2.068	2.09	2.379
9.023186	1.884	2.182	2.351
9.026651	1.74	2.081	2.17
9.139629	2.058	2.091	2.151
9.101413	1.786	2.145	2.164
9.093274	1.982	2.044	2.181
9.073686	1.969	2.06	2.213
9.071874	2.062	2.145	2.262
9.068611	1.839	2.122	1.92
9.144973	1.66	2.32	2.056
9.061011	1.762	2.258	1.982
9.040471	2.072	2.235	2.29
9.135124	1.991	2.057	1.989
9.184896	1.907	1.777	2.375
9.162443	2.215	1.939	2.29
9.183374	2.255	2.096	2.256
9.118524	1.999	1.939	2.373
9.121637	1.956	2.076	2.39
9.105624	2.441	1.979	2.294
9.16598	2.047	1.744	2.058
9.110858	2.172	1.843	2.122
9.146412	2.084	1.843	2.021
9.108425	1.923	1.974	2.351
9.200126	2.431	2.03	2.202
9.074418	2.315	1.882	2.232
9.128935	3.633	2.174	1.907
9.1502	2.472	2.115	1.989
9.200032	2.448	1.885	2.319
9.129797	2.495	1.874	2.402
9.154199	2.211	1.931	1.944
9.185034	3.795	2.125	2.026
9.15168	2.434	2.173	1.945
9.160019	2.283	2.079	1.764
9.119621	1.944	1.888	1.975
9.257911	2.207	1.925	1.821
9.203555	2.304	2.097	1.794
9.150872	2.468	2.235	2.021
9.180226	2.281	2.347	1.912
9.104989	2.27	2.07	1.995
9.105948	2.377	2.249	2.017
9.162015	2.236	2.088	2.039
9.141794	2.408	2.242	2.036
9.147988	2.603	2.143	2.183
9.247853	2.377	2.01	2.248
9.217153	2.187	1.847	2.226
9.223071	2.522	1.964	2.334
9.152767	4.045	1.893	2.33
9.15166	2.167	1.861	2.413
9.201674	2.154	1.957	2.319
9.134676	2.366	2.109	2.077
9.194209	3.856	1.913	1.894
9.177908	1.995	1.95	1.767
9.167268	2.129	1.955	2.018
9.151265	3.659	1.899	1.678
9.158896	2.279	2.211	2.001
9.243202	1.847	1.971	2.021
9.188099	2.202	1.91	1.926
9.110545	2.293	2.081	2.029
9.087826	2	1.941	1.864
9.066462	2.193	1.832	1.977
9.118875	2.215	1.755	1.956
9.18355	3.55	1.762	1.947
9.216438	2.276	1.782	2.204
9.227678	2.503	1.897	1.854
9.167844	2.006	1.805	1.755
9.214532	2	1.845	1.836
9.236536	2.31	1.765	1.927
9.244019	2.306	1.612	1.915
9.226339	2.372	1.814	2.114
9.208553	2.364	1.709	2.051
9.25244	2.253	1.584	1.93
9.238647	2.229	1.441	1.742
9.209187	2.229	1.396	1.758
9.210144	2.518	1.564	1.766
9.240346	2.257	1.668	2.007
9.160263	2.012	1.672	1.9
9.231668	2.066	1.852	1.997
9.138174	2.152	1.909	1.83
9.201335	2.213	2.099	2.11
9.223321	2.226	1.974	1.999
9.229561	1.959	1.906	2.085
9.203957	1.866	1.807	1.877
9.205258	2.258	1.858	1.898
9.240256	2.172	1.99	1.973
9.217741	1.752	2.051	1.827
9.278302	1.998	1.96	1.699
9.210626	2.16	1.953	1.869
9.256952	2.117	1.911	2.122
9.21986	2.215	1.827	1.762
9.172696	2.262	1.974	1.928
9.193128	2.377	1.969	2.019
9.190881	2.214	1.948	1.959
9.248664	2.309	2.016	1.962
9.197475	2.415	1.891	1.935
9.111945	2.043	1.921	1.953
9.119165	2.368	1.771	1.885
9.061168	1.992	1.866	1.908
9.171362	1.784	1.847	2.033
9.192259	2.004	1.913	2.146
9.144126	2.144	1.934	2.057
9.115808	2.115	1.645	2.178
9.194404	1.94	1.787	2.039
9.169123	1.824	1.712	2.022
9.178579	1.822	1.863	2.071
9.201679	1.735	1.694	2.333
9.167955	1.862	1.547	2.398
9.191741	1.711	1.556	2.197
9.231886	1.631	1.526	2.208
9.173102	1.684	1.702	2.172
9.181019	1.595	1.732	2.173
9.280002	1.356	1.751	2.18
9.178193	1.412	1.682	2.204
9.267948	1.421	1.714	2.086
9.194655	1.564	1.807	2.346
9.174611	1.71	1.539	2.079
9.169988	1.866	1.727	2.223
9.194068	1.5	1.693	2.157
9.241371	1.474	1.895	2.01
9.261096	1.708	1.83	1.898
9.299621	1.81	1.687	1.98
9.275946	1.843	1.624	1.863
9.270927	1.709	1.616	1.883
9.261936	1.653	1.514	1.925
9.177706	1.703	1.645	2.013
9.178217	1.919	1.476	2.22
9.142223	1.857	1.657	2.068
9.156223	1.961	1.804	1.98
9.156618	1.86	1.698	2.207
9.224598	1.656	1.691	2.243
9.145492	1.689	1.709	2.247
9.164219	2.013	1.727	2.266
9.236575	1.739	1.589	2.3
9.179897	1.925	1.576	2.664
9.225461	1.716	1.597	2.454
9.193425	1.643	1.605	2.497
9.236618	1.698	1.74	2.426
9.214889	1.933	1.591	2.388
9.294806	3.787	1.668	2.279
9.246879	1.792	1.756	2.332
9.212863	1.819	1.315	2.458
9.183906	1.862	1.575	2.416
9.179587	1.805	1.476	2.567
9.121349	1.777	1.601	2.582
9.1528	1.844	1.559	2.788
9.137032	2.251	1.537	3.136
9.114495	2.088	1.624	2.799
9.255757	1.854	1.526	2.507
9.158029	2.161	1.45	2.742
9.197109	2.378	1.548	2.623
9.20651	2.307	1.647	2.528
9.23403	2.532	1.592	2.609
9.198382	2.301	1.381	2.276
9.287394	2.391	1.689	2.149
9.211054	2.418	1.677	2.364
9.189912	2.291	1.55	2.327
9.189435	2.237	1.789	2.818
9.216093	2.088	1.645	2.884
9.234425	2.206	1.753	2.732
9.246538	2.135	1.568	2.506
9.226662	2.381	1.64	2.595
9.235276	2.16	1.919	2.574
9.211597	2.045	1.828	2.651
9.272246	1.935	1.87	2.505
9.195573	2.05	1.822	2.492
9.243561	2.068	2.068	2.316
9.148063	2.115	1.653	2.256
9.215055	2.136	1.636	2.483
9.271022	2.234	1.681	2.169
9.288494	2.232	1.654	2.3
9.339717	2.099	1.468	2.208
9.327173	2.297	1.755	2.297
9.337422	2.149	1.8	1.914
9.264266	2.01	1.512	2.07
9.282599	1.998	1.546	2.157
9.334484	2.026	1.527	2.128
9.342202	1.939	1.693	2.484
9.341145	2.03	1.384	2.476
9.337313	2.438	1.402	2.242
9.395841	2.428	1.612	2.083
9.368078	2.033	1.885	2.555
9.323581	1.816	1.628	2.361
9.310922	2.494	1.908	2.349
9.322837	2.241	1.857	2.211
9.322886	2.234	1.781	2.136
9.222172	2.328	1.725	2.087
9.208474	2.432	1.731	1.867
9.306316	2.351	2.029	1.92
9.407603	2.272	2.026	1.981
9.302782	2.175	1.976	2.048
9.319809	2.507	2.014	2.171
9.307799	2.522	1.916	2.163
9.306819	2.632	2.065	1.956
9.283429	2.602	1.725	1.898
9.29006	2.54	1.818	2.08
9.319784	2.039	1.88	2.276
9.278912	2.154	1.876	2.215
9.356247	1.872	1.772	1.907
9.258068	2.233	1.94	2.069
9.301211	3.81	1.634	2.191
9.223609	3.626	1.69	2.085
9.274391	2.127	1.927	2.246
9.181124	3.802	1.958	2.389
9.277418	3.596	1.638	2.451
9.274294	2.308	1.726	2.467
9.268259	2.262	1.627	2.456
9.355678	2.195	1.463	2.375
9.243398	2.217	1.614	2.504
9.305371	1.948	1.855	2.462
9.287164	2.298	1.778	2.341
9.298144	1.707	1.737	2.491
9.26828	1.733	1.823	2.452
9.320478	1.93	1.98	2.559
9.278975	2.076	1.903	2.266
9.278599	2.215	1.759	2.142
9.217773	1.957	1.636	2.487
9.226298	2.009	1.972	2.814
9.26198	1.993	1.791	2.741
9.294988	1.921	1.622	2.318
9.329146	2.037	1.498	2.174
9.306529	1.721	1.814	2.466
9.249321	1.794	1.661	2.393
9.273888	2.079	2.14	2.283
9.331746	2.229	1.99	2.457
9.297736	2.33	1.92	2.569
9.273998	2.077	2.159	2.56
9.218636	2.24	2.077	2.551
9.321843	1.908	2.143	2.555
9.231422	1.906	2.181	2.619
9.298299	1.929	2.016	2.412
9.333372	1.996	2.215	2.503
9.227402	1.912	1.965	2.624
9.211789	1.897	2.009	3.077
9.277191	2.253	1.801	2.925
9.294775	1.863	2.13	2.955
