# Supplementary material for: The role of scaffold reshaping and disassembly in dynamin driven membrane fission
Source: eLife journal article supplement (doi:10.7554/elife.39441), 2018-12-18
Supplement: supp [file elife-39441-supp-v1.zip › elife_poa_e39441_Figure_2_source_data_1.txt]

#  DATA FILE for Fig. 2f in the paper
#
#      "The role of scaffold reshaping and disassembly
#       in dynamin driven membrane fission"
#
#  by Martina Pannuzzo, Zachary A. McDargh, and Markus Deserno
#
#  published in eLife
#
#  -------------------------------------------------------------
#  Fission driven by CONSTRICTION and ELONGATION
#  -------------------------------------------------------------
#  
#  Column 1: R  (scaffold radius, in units of sigma)
#  Column 2: Rg (gyration radius of neck, in units of sigma)
#  
17.807503	10.005
17.807503	10.676
17.718808	10.868
17.64464	10.935
17.589156	10.931
17.579751	10.94
17.818223	10.947
17.768975	11.033
17.565459	10.997
17.384953	10.942
17.507096	11.113
17.58189	11.021
17.669928	10.986
17.638942	10.987
17.630809	11.001
17.720268	10.921
17.441473	10.83
17.286012	10.739
17.28684	10.92
17.347732	10.908
17.376085	10.809
17.456257	10.83
17.580185	10.669
17.584215	10.776
17.671244	10.669
17.765663	10.694
17.686253	10.662
17.605636	10.633
17.687056	10.687
17.43496	10.625
17.410207	10.72
17.61758	10.619
17.686082	10.465
17.729663	10.449
17.825463	10.454
17.813947	10.428
17.921683	10.552
17.89762	10.457
18.047691	10.485
17.937444	10.55
17.911977	10.418
17.964735	10.448
17.900977	10.562
17.929614	10.491
17.8841	10.452
17.844093	10.618
17.645949	10.667
17.546003	10.599
17.603825	10.511
17.632551	10.524
17.81137	10.53
17.845664	10.477
17.815867	10.585
17.855194	10.424
17.832519	10.61
17.637784	10.567
17.716904	10.482
17.71889	10.571
17.526873	10.586
17.568005	10.651
17.548865	10.559
17.472584	10.739
17.622687	10.759
17.618686	10.773
17.626236	10.848
17.733979	10.638
17.778419	10.641
17.754913	10.638
17.691098	10.675
17.726084	10.738
17.775759	10.789
17.614852	10.787
17.740716	10.852
17.48133	10.785
17.439397	10.831
17.610774	10.861
17.631409	10.793
17.596349	10.836
17.525543	10.87
17.556094	10.862
17.574233	10.821
17.633331	10.859
17.553449	10.787
17.498952	11.001
17.495154	11.036
17.598181	11.219
17.427828	10.973
17.66525	11.033
17.62967	10.958
17.762265	10.94
17.730098	11.04
17.789616	10.857
17.827107	11.033
17.804772	10.946
17.778199	11.133
17.547052	11.077
17.493977	10.977
17.606075	10.999
17.526315	11.082
17.740789	11.021
17.771771	11.002
17.788964	10.975
17.609839	10.837
17.728991	10.802
17.626466	10.748
17.530171	10.817
17.621605	10.756
17.479651	10.787
17.601845	10.832
17.792222	10.892
17.790622	10.977
17.849125	10.977
17.779699	11.001
17.716597	10.88
17.682292	10.868
17.807727	10.934
17.529068	10.936
17.366314	10.862
17.255312	10.948
17.084681	10.981
17.354697	10.772
17.567992	10.835
17.611296	10.866
17.599365	10.906
17.533307	10.818
17.427706	10.848
17.390104	10.752
17.535542	10.694
17.499968	10.764
17.56478	10.817
17.65275	10.524
17.553741	10.704
17.586158	10.657
17.689405	10.648
17.533207	10.71
17.645979	10.714
17.59486	10.803
17.677593	10.812
17.622663	10.788
17.657385	10.913
17.697651	10.96
17.905967	10.87
17.862706	10.87
17.785768	10.952
17.706175	10.779
17.746125	10.73
17.811154	10.721
17.789269	10.808
17.875443	10.56
17.750216	10.739
17.860606	10.739
17.512876	10.724
17.63494	10.754
17.608288	10.831
17.521345	10.828
17.643029	10.862
17.604786	10.76
17.485062	10.853
17.624361	10.923
17.836841	10.921
17.816536	10.867
17.699479	10.964
17.723989	10.903
17.690466	10.872
17.47393	10.684
17.524378	10.799
17.554844	10.757
17.757835	10.898
17.59279	10.876
17.580859	10.808
17.749525	10.822
17.742835	10.819
17.397431	10.829
17.671731	10.841
17.372327	10.75
17.643558	10.966
17.829271	10.91
17.722354	11.015
17.79654	10.99
17.802008	11.029
17.834522	11.031
17.641978	10.888
17.825819	10.837
17.790568	10.935
17.746263	10.942
17.739238	10.991
17.702794	11.004
17.69871	11.072
17.496483	11.014
17.291054	11.036
17.448816	11.05
17.507773	11.049
17.552977	11.269
17.816897	11.202
17.844767	11.254
17.73061	11.191
17.609256	11.106
17.269452	10.946
17.400776	11.11
17.370295	11.182
17.590221	11.113
17.413378	11.001
17.343288	11.065
17.39277	11.106
17.463013	11.043
17.240938	11.162
17.376123	11.136
17.172995	11.179
17.526427	11.164
17.392904	11.157
17.533037	11.208
17.461671	11.201
17.304055	11.034
17.517586	11.137
17.549475	11.152
17.504409	11.029
17.685086	10.935
17.348988	10.939
17.461337	11.049
17.476847	11.072
17.479499	10.989
17.427035	11.044
17.364392	11.042
17.474	11.093
17.296339	11.16
17.309199	11.122
17.302021	11.302
17.424527	11.259
17.515962	11.218
17.542137	11.388
17.430994	11.411
17.556887	11.354
17.62976	11.288
17.643013	11.351
17.772523	11.423
17.67148	11.327
17.710927	11.264
17.678364	11.276
17.659519	11.285
17.713788	11.324
17.658992	11.357
17.411913	11.431
17.556844	11.383
17.626227	11.346
17.608052	11.267
17.578137	11.25
17.564808	11.19
17.537401	11.188
17.461155	11.159
17.385697	11.216
17.556206	11.164
17.31706	11.333
17.324994	11.295
17.402715	11.152
17.46597	11.084
17.47651	11.243
17.335924	11.17
17.494994	11.257
17.346118	11.33
17.556386	11.305
17.665848	11.292
17.718539	11.417
17.333176	11.408
17.190759	11.384
17.186966	11.379
17.596089	11.61
17.650013	11.538
17.489477	11.601
17.489178	11.596
17.611251	11.627
17.544827	11.507
17.511343	11.465
17.551731	11.581
17.378806	11.544
17.492976	11.537
17.535877	11.616
17.462964	11.538
17.322601	11.569
17.374856	11.486
17.364127	11.399
17.245067	11.425
17.371747	11.472
17.322941	11.587
17.338057	11.713
17.197354	11.713
17.35663	11.65
17.622584	11.604
17.506365	11.736
17.635411	11.6
17.659662	11.694
17.627125	11.667
17.657732	11.628
17.617208	11.441
17.58861	11.327
17.594633	11.47
17.594814	11.496
17.56023	11.54
17.624403	11.533
17.504425	11.537
17.62557	11.646
17.64089	11.753
17.033365	11.841
16.920523	11.76
16.973479	11.544
16.930204	11.715
16.970615	11.672
17.074271	11.671
16.991613	11.489
16.902989	11.472
16.917618	11.437
16.908726	11.51
17.061882	11.464
16.997396	11.422
16.859091	11.344
16.958654	11.34
17.033837	11.288
16.976458	11.051
17.081292	11.09
17.143615	11.097
16.907734	11.079
16.889983	11.166
17.052545	11.314
17.05616	11.163
17.02753	11.184
16.874397	11.117
16.97652	11.193
17.049488	11.131
17.149056	11.021
17.110968	10.86
17.138858	10.929
16.995332	10.871
16.942321	10.945
16.848828	11.189
16.862223	10.941
16.800633	10.956
16.885611	10.873
16.881448	10.996
16.866288	11.102
16.99842	10.892
16.9574	10.834
17.018149	10.772
17.042635	10.877
17.064389	10.914
16.936575	10.789
17.033712	10.736
17.09627	10.765
17.050505	10.666
17.00632	10.706
16.946561	10.668
16.936417	10.658
16.977512	10.647
16.919404	10.606
16.866325	10.713
17.1228	10.531
17.11655	10.647
17.026369	10.638
17.06837	10.682
17.046766	10.703
16.942328	10.664
16.872176	10.718
16.873185	10.63
16.910757	10.746
16.765394	10.693
16.848282	10.694
16.841881	10.792
16.974682	10.821
17.049262	10.804
16.93778	10.785
17.058401	10.733
16.968791	10.663
17.209603	10.72
17.278637	10.743
17.324768	10.755
17.148592	10.778
16.931057	10.619
16.953182	10.583
16.889207	10.619
16.882783	10.585
16.858135	10.345
16.802798	10.453
16.812881	10.278
16.821462	10.291
16.921779	10.173
16.822541	10.375
16.807366	10.296
16.853964	10.37
16.843808	10.445
16.811917	10.45
17.026648	10.326
17.074601	10.222
17.093941	10.387
16.995797	10.39
17.14684	10.545
17.03131	10.439
17.070959	10.38
17.144075	10.221
17.13089	10.547
16.974665	10.398
17.141056	10.317
17.193696	10.394
17.219343	10.384
17.108556	10.313
17.052955	10.26
17.130444	10.319
17.212767	10.467
17.10157	10.661
17.105697	10.593
17.050977	10.512
16.961571	10.569
16.958227	10.545
16.921098	10.546
16.90822	10.35
16.743306	10.244
16.520078	10.306
16.696649	10.285
16.734428	10.387
16.756908	10.44
16.731458	10.321
16.947712	10.365
16.951928	10.217
16.925653	10.323
16.949462	10.302
17.01472	10.274
16.940153	10.177
16.89466	10.175
16.903976	10.21
16.98621	10.193
17.214692	10.264
17.060848	10.265
17.07991	10.233
17.055203	10.112
17.096121	9.985
17.087637	10.023
16.935826	10.047
16.986851	10.103
16.870469	10.051
16.852693	10.188
16.977412	10.205
16.764467	10.184
16.872614	10.207
16.883063	10.374
17.042435	10.374
16.867307	10.292
16.786341	10.25
16.874781	10.21
16.900826	10.111
16.882029	10.273
17.010021	10.157
17.031992	10.241
16.916572	10.278
16.958151	10.438
17.013881	10.37
16.971578	10.329
17.006385	10.374
16.963527	10.53
16.869469	10.357
16.915127	10.38
16.89145	10.254
17.07431	10.323
17.119	10.449
16.985436	10.371
16.981951	10.491
16.853473	10.378
16.70914	10.223
16.74099	10.301
16.811668	10.235
16.839502	10.255
16.973362	10.461
16.885486	10.511
16.974256	10.584
16.934347	10.501
16.922393	10.445
16.876515	10.414
16.820052	10.342
16.863023	10.36
16.854638	10.442
16.871591	10.452
16.846748	10.384
16.681826	10.508
16.828108	10.532
16.75252	10.624
16.801925	10.66
16.735565	10.589
16.82151	10.508
16.696846	10.479
16.540847	10.474
16.728869	10.408
16.767024	10.347
16.668645	10.447
16.641762	10.398
16.897818	10.286
16.66333	10.335
16.768948	10.411
16.90527	10.339
16.794664	10.394
16.87636	10.268
16.83128	10.27
16.790793	10.22
16.843663	10.245
16.597588	10.168
16.618711	10.093
16.817168	10.275
16.801946	10.145
16.696886	10.18
16.781769	10.224
16.656753	10.212
16.633506	10.158
16.634217	10.301
16.623692	10.274
16.759499	10.227
16.729361	10.135
16.804216	10.188
16.730105	10.122
16.782614	10.223
16.651539	10.166
16.853881	10.233
17.041951	10.242
16.760365	10.172
16.914893	10.197
16.632199	10.261
17.034093	10.17
16.935495	10.257
16.879719	10.164
16.928923	10.169
16.992394	10.106
16.899912	10.186
16.842122	10.135
16.991041	10.175
16.853086	10.086
16.797983	10.149
16.668867	10.17
16.639944	10.199
16.772918	10.216
16.866911	10.235
16.79779	10.245
16.661097	10.259
16.44593	10.353
16.413166	10.243
16.545011	10.225
16.889247	10.278
16.917089	10.258
16.870916	10.289
16.885759	10.345
16.887651	10.3
16.811205	10.367
16.991565	10.33
16.949098	10.385
16.975316	10.457
17.021943	10.307
16.920253	10.291
16.832236	10.341
16.925169	10.49
17.001729	10.554
17.024884	10.494
17.084858	10.381
16.928858	10.413
16.956028	10.32
16.862026	10.224
16.846282	10.133
16.815859	10.29
16.824128	10.344
16.881833	10.383
16.880258	10.255
16.776119	10.371
16.942929	10.384
16.989768	10.4
16.912632	10.499
16.796323	10.591
16.742731	10.602
16.735681	10.732
16.759844	10.785
16.650721	10.813
16.687775	10.738
16.711496	10.656
16.785982	10.495
16.723101	10.639
16.701759	10.52
16.663078	10.302
16.708223	10.464
16.790317	10.329
16.801808	10.399
16.666672	10.416
16.70531	10.464
16.826823	10.52
16.614981	10.59
16.602201	10.398
16.475937	10.355
16.517371	10.321
16.485653	10.372
16.584953	10.289
16.684177	10.351
16.807339	10.424
16.860235	10.376
16.768684	10.46
16.807876	10.416
16.737728	10.198
16.739446	10.255
16.606263	10.254
16.548118	10.198
16.670928	10.28
16.714226	10.208
16.234694	10.202
16.192118	10.251
16.226434	10.219
16.283117	10.242
16.242112	10.357
16.269264	10.254
16.239228	10.198
16.208705	10.154
16.275825	10.217
16.274853	10.163
16.307562	10.209
16.318561	10.166
16.295445	10.189
16.194021	10.132
16.31083	10.11
16.36899	10.003
16.33747	10.055
16.340988	9.996
16.343013	9.988
16.324739	9.961
16.303321	10.089
16.425094	10.034
16.350781	9.994
16.386663	9.953
16.375054	9.875
16.090994	9.824
16.229993	9.819
16.042086	9.824
16.123907	9.85
16.257036	9.855
16.25961	9.997
16.2731	9.813
16.284444	9.753
16.299413	9.697
16.243387	9.656
16.192456	9.699
16.210682	9.763
16.180023	9.761
16.275312	9.743
16.296789	9.745
16.328581	9.688
16.29991	9.717
16.371681	9.792
16.316127	9.758
16.289684	9.819
16.210998	9.802
16.036678	9.749
16.184158	9.682
16.258864	9.775
16.232841	9.816
16.158739	9.786
16.175293	9.626
16.173972	9.728
16.090683	9.756
16.188607	9.713
16.238123	9.748
16.227379	9.721
16.092134	9.722
15.989155	9.702
16.020402	9.738
16.079821	9.758
16.010609	9.712
16.128753	9.739
16.062961	9.619
16.19426	9.583
16.213017	9.656
16.152335	9.634
16.155436	9.609
16.121295	9.606
16.186538	9.688
16.30947	9.686
16.278633	9.702
16.280628	9.651
16.404071	9.753
16.388911	9.545
16.333201	9.448
16.365775	9.544
16.465533	9.528
16.504546	9.655
16.497378	9.694
16.506259	9.755
16.352261	9.748
16.208981	9.594
16.262778	9.767
16.246049	9.767
16.163026	9.835
16.329356	9.72
16.311754	9.554
16.306966	9.57
16.265884	9.657
16.259087	9.528
16.131678	9.615
16.276922	9.661
16.339624	9.734
16.282296	9.722
16.196572	9.812
16.267364	9.768
16.140252	9.792
16.306815	9.873
16.296925	9.998
16.415689	9.88
16.389551	9.771
16.396379	9.71
16.386495	9.667
16.402642	9.648
16.421753	9.67
16.416003	9.775
16.342137	9.73
16.329299	9.66
16.232884	9.616
16.279048	9.528
16.270228	9.439
16.28615	9.41
16.346636	9.467
16.290679	9.404
16.318472	9.434
16.333457	9.43
16.393139	9.526
16.198596	9.482
16.185381	9.545
16.206709	9.459
16.292123	9.49
16.198576	9.486
16.263453	9.429
16.209774	9.507
16.067461	9.499
16.109211	9.363
16.081256	9.422
16.227085	9.34
16.158774	9.379
16.202102	9.286
16.245412	9.292
16.342245	9.359
16.353254	9.557
16.193081	9.57
16.317256	9.75
16.355615	9.546
16.319798	9.485
16.302551	9.518
16.257714	9.406
16.160247	9.555
16.121574	9.55
16.152382	9.602
16.083007	9.508
16.100688	9.38
16.025271	9.495
16.083526	9.451
16.10128	9.409
16.192414	9.483
16.177199	9.532
16.12864	9.502
16.244637	9.593
16.259119	9.722
16.277513	9.626
16.356215	9.69
16.495449	9.765
16.374566	9.697
16.333226	9.707
16.367139	9.535
16.348504	9.646
16.278855	9.45
16.205982	9.561
16.158561	9.546
16.156368	9.528
16.146884	9.493
16.126297	9.476
16.192164	9.446
16.244605	9.548
16.206532	9.542
16.224854	9.561
16.080061	9.587
16.247342	9.645
16.151109	9.609
16.146595	9.667
16.245848	9.552
16.232446	9.544
16.190997	9.513
16.19058	9.374
16.175494	9.393
16.343059	9.497
16.478786	9.471
16.471616	9.61
16.24318	9.752
16.088478	9.705
16.039016	9.792
16.202143	9.696
16.16505	9.66
16.002729	9.826
16.035101	9.614
16.290463	9.665
16.353117	9.55
16.299336	9.501
16.201719	9.589
16.171122	9.441
16.224761	9.477
16.291201	9.494
16.364592	9.548
16.249697	9.428
16.225719	9.67
16.152796	9.541
16.223756	9.437
16.087236	9.529
16.078488	9.4
16.085849	9.465
16.211668	9.484
16.351001	9.448
16.319071	9.521
16.323629	9.544
16.456357	9.523
16.367301	9.69
16.355042	9.722
16.198808	9.766
16.280084	9.703
16.201577	9.687
16.314419	9.789
16.29097	9.736
16.172762	9.762
16.162103	9.809
16.279231	9.8
16.285589	9.711
16.348676	9.703
16.342846	9.699
16.444337	9.717
16.392913	9.652
16.333244	9.63
16.317911	9.58
16.337801	9.572
16.37165	9.592
16.306913	9.662
16.377187	9.622
16.339785	9.59
16.323705	9.731
16.314909	9.618
16.34075	9.681
16.442434	9.765
16.312429	9.776
16.284919	9.646
16.308684	9.442
16.493363	9.497
16.449311	9.649
16.388077	9.602
16.32167	9.757
16.225049	9.74
16.132826	9.893
16.255108	9.908
16.291068	9.913
16.314683	9.783
16.464346	9.848
16.579518	9.825
16.569322	9.828
16.462156	9.78
16.499914	9.74
16.467403	9.735
16.445732	9.778
16.488849	9.556
16.47917	9.505
16.485664	9.549
16.600101	9.583
16.547476	9.62
16.470778	9.632
16.446574	9.279
16.460434	9.218
16.220945	9.409
16.146524	9.314
16.106718	9.281
16.110577	9.377
16.094648	9.334
16.008036	9.465
16.000938	9.367
16.078786	9.305
16.044773	9.492
16.056276	9.54
16.215055	9.656
16.20487	9.582
16.186938	9.656
16.262562	9.6
16.255883	9.527
16.388871	9.509
16.380523	9.4
16.406598	9.558
16.427986	9.58
16.310872	9.537
16.120799	9.521
16.220191	9.504
16.237435	9.267
16.358667	9.372
16.373865	9.404
16.502794	9.49
16.299047	9.561
16.256699	9.661
16.305106	9.491
16.329988	9.607
16.374556	9.492
16.397735	9.358
16.326227	9.465
16.392629	9.437
16.380345	9.442
16.310872	9.389
16.238685	9.442
16.358813	9.52
15.563094	9.475
15.360404	9.569
15.352215	9.617
15.388457	9.569
15.335599	9.502
15.299201	9.54
15.232007	9.457
15.212702	9.314
15.257859	9.369
15.447578	9.326
15.580763	9.29
15.460571	9.365
15.318193	9.261
15.309429	9.231
15.391253	9.073
15.397492	9.049
15.447616	9.005
15.320446	9.01
15.351129	9.057
15.397997	9.031
15.407373	8.982
15.409831	9.019
15.397493	8.946
15.370264	8.944
15.27761	9.034
15.265543	8.999
15.36452	9.026
15.509353	8.934
15.502244	8.873
15.60749	8.949
15.603844	8.934
15.534544	8.812
15.505226	8.845
15.372074	8.871
15.27136	8.836
15.315681	8.811
15.272801	8.826
15.332849	8.667
15.247409	8.931
15.245902	8.887
15.246977	8.893
15.235831	8.88
15.287699	8.867
15.298104	8.968
15.28592	8.919
15.25082	8.891
15.414688	8.834
15.331919	8.835
15.310662	8.724
15.280002	8.869
15.375084	8.894
15.290779	8.737
15.375181	8.888
15.448472	8.807
15.330302	8.777
15.251946	8.89
15.245511	8.771
15.317411	8.718
15.333109	8.701
15.339686	8.848
15.31184	8.868
15.261049	8.635
15.262211	8.93
15.226518	8.87
15.238774	8.83
15.268455	8.718
15.251278	8.825
15.368304	8.693
15.390668	8.726
15.405602	8.762
15.355776	8.807
15.437485	8.724
15.425979	8.777
15.511834	8.796
15.440208	8.801
15.41098	8.72
15.345578	8.596
15.33789	8.638
15.417313	8.568
15.408149	8.595
15.353479	8.521
15.39298	8.468
15.385396	8.621
15.410719	8.643
15.346726	8.739
15.330486	8.644
15.351254	8.704
15.360849	8.568
15.272987	8.637
15.223174	8.71
15.29241	8.677
15.310629	8.563
15.334163	8.6
15.368236	8.67
15.385342	8.662
15.347915	8.707
15.335984	8.742
15.287178	8.767
15.224427	8.787
15.20972	8.664
15.319723	8.625
15.382897	8.615
15.499001	8.518
15.465633	8.539
15.467778	8.579
15.35715	8.602
15.26436	8.637
15.42215	8.615
15.252366	8.674
15.215888	8.762
15.345006	8.727
15.267858	8.891
15.270586	8.769
15.265674	8.754
15.160957	8.753
15.260346	8.661
15.28652	8.633
15.364315	8.647
15.420504	8.664
15.336597	8.589
15.325081	8.424
15.338736	8.485
15.313489	8.484
15.283694	8.473
15.200405	8.373
15.236175	8.444
15.344581	8.427
15.309102	8.47
15.355469	8.415
15.203224	8.42
15.289517	8.427
15.331941	8.456
15.350223	8.406
15.399473	8.484
15.39874	8.52
15.358999	8.563
15.445442	8.608
15.469277	8.441
15.530035	8.347
15.513175	8.417
15.514567	8.548
15.46778	8.33
15.545203	8.466
15.506055	8.448
15.357394	8.514
15.39734	8.39
15.341661	8.627
15.434875	8.671
15.29322	8.695
15.276335	8.786
15.213977	8.67
15.326582	8.507
15.29955	8.554
15.287172	8.687
15.332681	8.504
15.246097	8.576
15.344772	8.705
15.190074	8.608
15.331292	8.563
15.231552	8.455
15.288935	8.384
15.146969	8.467
15.159161	8.327
15.201712	8.457
15.210002	8.484
15.273318	8.434
15.175842	8.474
15.033328	8.426
15.116076	8.447
15.174359	8.471
15.208365	8.732
15.199696	8.62
15.196699	8.747
15.290143	8.793
15.404915	8.594
15.429841	8.722
15.386779	8.618
15.437397	8.463
15.484024	8.407
15.490054	8.512
15.470174	8.476
15.528848	8.426
15.483261	8.586
15.454394	8.519
15.537815	8.445
15.502463	8.387
15.451416	8.368
15.443034	8.462
15.432758	8.472
15.359917	8.48
15.432855	8.279
15.370367	8.376
15.37689	8.4
15.337919	8.326
15.373648	8.302
15.323847	8.333
15.398284	8.363
15.379965	8.405
15.359024	8.34
15.331036	8.28
15.359112	8.317
15.513175	8.377
15.504544	8.575
15.41292	8.578
15.369383	8.539
15.386279	8.527
15.395022	8.571
15.360064	8.523
15.438343	8.662
15.426229	8.578
15.474118	8.591
15.438822	8.51
15.413717	8.387
15.36891	8.493
15.370948	8.558
15.349985	8.507
15.447928	8.559
15.449994	8.461
15.306499	8.501
15.408169	8.537
15.424896	8.528
15.44333	8.434
15.393532	8.324
15.301761	8.232
15.282427	8.375
15.290135	8.309
15.254093	8.481
15.300213	8.284
15.240413	8.395
15.177818	8.314
15.246286	8.424
15.378447	8.372
15.39701	8.409
15.357469	8.396
15.280828	8.219
15.26061	8.302
15.266719	8.193
15.29824	8.093
15.341583	8.106
15.288699	7.91
15.276874	8.207
15.403145	8.333
15.415075	8.233
15.43693	8.185
15.554351	8.15
15.41701	8.307
15.236879	8.214
15.212068	8.155
15.118493	8.22
15.16073	8.229
15.302582	8.269
15.260791	8.184
15.271256	8.199
15.342468	8.305
15.338092	8.343
15.298058	8.351
15.327846	8.356
15.439649	8.438
15.449451	8.422
15.433746	8.264
15.422272	8.402
15.411893	8.499
15.396307	8.424
15.496381	8.465
15.458107	8.461
15.556596	8.346
15.5389	8.279
15.427667	8.13
15.464355	8.234
15.461052	8.275
15.408201	8.216
15.372703	8.17
15.317403	8.255
15.260749	8.112
15.280378	8.168
15.331921	8.249
15.354197	8.294
15.342285	8.142
15.407175	8.155
15.342523	8.151
15.212762	8.038
15.257758	7.954
15.248022	8.122
15.34013	8.042
15.200049	8.094
15.098453	8.038
15.084859	8.088
15.036304	8.107
15.119832	8.023
15.220423	8.058
15.217616	8.011
15.168048	7.947
15.265478	7.839
15.090274	8.077
15.229557	8.199
15.338825	8.112
15.334158	8.217
15.410901	8.234
15.446666	8.116
15.515551	8.1
15.554176	8.041
14.46394	8.188
14.411301	8.246
14.387911	8.242
14.38905	8.197
14.322502	8.279
14.346599	8.263
14.336659	8.082
14.437409	8.109
14.410785	8.154
14.38871	8.162
14.476254	8.013
14.515834	7.934
14.548305	7.866
14.528585	7.883
14.496293	7.663
14.616818	7.439
14.622846	7.425
14.557602	7.469
14.539652	7.607
14.474484	7.613
14.530687	7.452
14.470394	7.525
14.561153	7.638
14.443959	7.689
14.384238	7.634
14.350555	7.644
14.454208	7.547
14.485493	7.653
14.448492	7.54
14.503913	7.606
14.44619	7.691
14.446196	7.54
14.437417	7.565
14.335158	7.654
14.279715	7.674
14.261408	7.578
14.258013	7.534
14.319366	7.509
14.33565	7.52
14.316677	7.44
14.323364	7.544
14.280271	7.469
14.389669	7.402
14.332565	7.508
14.416443	7.449
14.475428	7.603
14.530748	7.455
14.417957	7.416
14.455774	7.553
14.306388	7.592
14.265593	7.673
14.256418	7.548
14.216757	7.588
14.312435	7.644
14.411474	7.451
14.461391	7.462
14.377093	7.618
14.401164	7.54
14.331484	7.571
14.28172	7.757
14.268729	7.719
14.21876	7.644
14.292007	7.609
14.308254	7.475
14.44	7.456
14.413605	7.433
14.457903	7.306
14.434942	7.471
14.373261	7.551
14.415091	7.586
14.399855	7.439
14.252119	7.251
14.293685	7.099
14.275216	7.285
14.348047	7.383
14.426764	7.436
14.4394	7.272
14.398718	7.251
14.358139	7.176
14.384258	7.235
14.40043	7.438
14.339556	7.232
14.383576	7.163
14.42291	7.236
14.350908	7.209
14.375243	7.221
14.361536	7.118
14.397754	7.251
14.437826	7.045
14.434385	7.152
14.54787	7.029
14.492183	7.062
14.489781	7.081
14.416482	7.13
14.390724	7.207
14.531536	7.246
14.486193	7.091
14.467324	7.135
14.486329	6.989
14.438548	7.266
14.594159	7.184
14.59241	7.151
14.447626	7.205
14.55371	7.197
14.546556	7.186
14.450965	7.183
14.442872	7.294
14.311896	7.388
14.294229	7.258
14.220826	7.255
14.241794	7.349
14.29296	7.261
14.328037	7.432
14.293415	7.293
14.234362	7.302
14.242911	7.444
14.246298	7.203
14.262031	7.29
14.306169	7.375
14.296413	7.261
14.393044	7.187
14.452569	7.363
14.525864	7.236
14.394642	7.346
14.323643	7.272
14.336325	7.269
14.333943	7.166
14.332089	7.104
14.482541	7.23
14.545389	7.293
14.45898	7.227
14.332542	7.296
14.357215	7.305
14.293264	7.365
14.291369	7.47
14.263397	7.66
14.308152	7.474
14.380027	7.327
14.289878	7.26
14.198518	7.294
14.128947	7.273
14.160054	7.381
14.163759	7.401
14.194159	7.395
14.209445	7.426
14.207925	7.371
14.261823	7.345
14.36781	7.351
14.380743	7.368
14.44989	7.363
14.526632	7.243
14.363081	7.041
14.308515	7.091
14.311592	7.122
14.489363	7.194
14.510248	7.077
14.333461	7.055
14.400044	6.888
14.434504	6.698
14.318442	6.702
14.304277	6.87
14.285039	6.951
14.249491	6.881
14.307331	6.816
14.272503	6.924
14.287732	6.957
14.297841	6.967
14.346711	6.986
14.326546	6.823
14.247094	6.93
14.287204	6.992
14.311149	6.904
14.219909	6.904
14.304432	6.841
14.367188	6.954
14.227175	6.974
14.258779	6.861
14.328034	6.945
14.296486	6.981
14.198152	6.846
14.208755	6.847
14.214281	6.886
14.210956	6.809
14.368321	7.014
14.381992	7.258
14.407568	7.347
14.330106	7.18
14.454129	7.399
14.352131	7.155
14.205993	7.212
14.242269	7.232
14.31145	7.294
14.257787	7.295
14.327962	7.356
14.405812	7.494
14.403297	7.37
14.395908	7.363
14.407058	7.356
14.29523	7.271
14.326456	7.267
14.331653	7.214
14.339015	7.146
14.297431	7.264
14.27773	7.265
14.208775	7.278
14.274838	7.262
14.267641	7.2
14.172858	7.258
14.381031	7.316
14.44333	7.405
14.463812	7.3
14.524713	7.262
14.505506	7.253
14.373538	7.141
14.518127	7.225
14.556919	7.175
14.500204	7.22
14.446174	7.218
14.371511	7.4
14.342508	7.278
14.406534	7.345
14.377229	7.417
14.28799	7.271
14.323216	7.426
14.324771	7.226
14.269554	7.259
14.230115	7.207
14.261522	7.058
14.252502	7.118
14.319388	7.14
14.388963	6.978
14.464616	7.012
14.458853	6.938
14.503598	6.922
14.377947	7.046
14.547744	7.187
14.547961	7.105
14.577223	7.134
14.558912	7.298
14.4652	7.232
14.354586	7.069
14.287317	7.116
14.343684	7.342
14.260071	7.334
14.40907	7.259
14.299571	7.343
14.321373	7.189
14.271442	7.272
14.49828	7.26
14.532984	7.375
14.542854	7.127
14.491251	7.07
14.458801	6.988
14.498921	6.945
14.51644	7.065
14.474896	6.983
14.484123	7.024
14.415888	7.005
14.472467	6.896
14.572329	6.938
14.590583	7.019
14.4473	6.743
14.359281	6.983
14.365229	6.874
14.366454	6.756
14.438283	6.717
14.562079	6.834
14.509663	7.106
14.536969	7.051
14.513729	7.177
14.384558	7.204
14.41839	7.3
14.33796	7.236
14.274156	7.276
14.23071	7.146
14.345742	7.112
14.381951	6.992
14.317271	7.151
14.465669	7.171
14.330006	7.123
14.157244	7.29
14.158687	7.096
14.27319	7.135
14.298515	7.019
14.406716	7.145
14.486642	7.141
14.482382	7.162
14.51409	7.279
14.315426	7.151
14.377188	7.174
14.312053	6.918
14.263665	7.015
14.348578	6.939
14.350161	7.124
14.337343	7.234
14.277208	7.273
14.280886	7.301
14.376701	7.429
14.339957	7.483
14.437415	7.497
13.022537	7.459
12.896194	7.549
13.070175	7.501
13.110417	7.364
13.104212	7.297
13.102177	7.177
13.204951	7.144
13.10355	7.21
13.135495	7.058
13.19489	7.183
13.109599	7.053
13.18851	6.963
13.101621	6.978
13.055328	7.009
13.188444	6.859
13.182632	6.832
13.164751	6.615
13.07596	6.693
12.998281	6.555
12.997916	6.591
12.840146	6.563
13.122644	6.682
13.188458	6.774
13.218996	6.689
13.226589	6.695
13.261079	6.738
13.276129	6.71
13.129841	6.635
13.235745	6.818
13.183256	6.736
13.109576	6.773
13.217488	6.769
13.185202	6.819
13.257121	6.751
13.20255	6.829
13.2664	6.812
13.158857	6.821
13.250493	6.732
13.179688	6.842
13.166443	6.854
13.04431	6.856
13.024021	6.906
13.097792	6.794
13.18417	6.986
13.122284	6.981
13.197389	6.949
13.275285	6.98
13.156201	6.927
13.294901	6.718
13.195062	6.877
13.164787	6.736
13.031526	6.757
13.11813	6.601
13.084698	6.706
13.228349	6.675
13.184847	6.702
13.218318	6.571
13.270349	6.583
13.217274	6.563
13.176976	6.538
13.00292	6.469
13.048897	6.502
12.998803	6.588
12.971005	6.46
13.059783	6.377
13.006503	6.385
13.102359	6.395
13.153556	6.432
13.157032	6.291
13.216512	6.441
13.245716	6.485
13.275046	6.315
13.358879	6.217
13.251188	6.012
13.124585	6.077
13.145833	6.337
13.163922	6.394
13.168621	6.379
13.222196	6.463
13.137791	6.299
13.177881	6.377
13.172252	6.291
13.213068	6.173
13.250379	6.185
13.211181	6.225
13.244666	6.2
13.187654	6.204
13.237369	6.073
13.17555	6.31
13.239184	6.348
13.115424	6.261
13.15691	6.318
13.141228	6.333
13.315342	6.266
13.271762	6.365
13.223918	6.301
13.1015	6.392
13.154969	6.295
13.194704	6.368
13.093	6.251
13.240329	6.275
13.085518	6.308
13.233869	6.151
13.214867	6.29
13.285995	6.225
13.284996	6.295
13.284225	6.264
13.150362	6.315
13.169825	6.489
13.184862	6.392
13.14073	6.313
13.146856	6.32
13.186815	6.423
13.240403	6.508
13.230704	6.428
13.388253	6.555
13.380772	6.46
13.328008	6.39
13.27622	6.192
13.244641	6.272
13.309348	6.336
13.310862	6.434
13.210574	6.408
13.164213	6.222
13.176992	6.211
13.113538	6.457
13.176962	6.405
13.15762	6.367
13.199906	6.229
13.171195	6.441
13.189321	6.281
13.084356	6.374
13.224784	6.228
13.249452	6.391
13.302044	6.235
13.244756	6.201
13.182693	6.264
13.206221	6.12
13.131161	6.267
13.124685	6.342
13.184515	6.305
13.195375	6.352
13.217587	6.277
13.090278	6.123
12.988815	6.132
12.978221	5.955
13.19752	6.092
13.282619	6.117
13.145082	6.045
13.114831	6.073
13.126887	5.926
13.191593	6.157
13.016534	6.22
13.146964	6.108
13.268451	6.142
13.25761	6.107
13.270166	5.795
13.170112	5.898
13.196364	6.07
13.082202	5.938
13.172474	5.977
13.131714	6.137
13.108031	6.204
13.090733	6.313
13.094919	6.252
13.032237	6.139
13.170199	6.069
13.085264	6.121
13.115708	6.346
13.132775	6.106
13.180489	6.254
13.176801	6.217
13.120124	6.161
13.071122	6.229
13.094401	6.121
13.119485	5.943
13.195438	6.074
13.204194	6.052
13.144822	6.284
13.087808	6.188
13.061316	6.283
13.06379	6.26
13.081389	6.258
12.902489	6.307
12.939481	6.303
12.908218	6.301
13.08395	6.297
13.133834	6.35
13.06523	6.228
13.009865	6.2
13.063565	6.615
13.053014	6.484
13.115699	6.282
13.217703	6.439
13.14229	6.325
13.182338	6.343
13.06726	6.063
13.1649	6.259
13.036995	6.092
13.077594	6.061
12.942635	6.098
13.07632	6.056
13.089952	6.044
13.084367	6.383
13.217676	6.133
13.122789	6.302
13.158861	6.245
13.026254	6.109
13.129277	5.991
13.13211	5.687
13.07011	5.869
13.134355	5.831
13.209909	5.862
13.210973	5.696
13.171171	5.967
13.007274	5.815
13.062871	5.799
13.083811	5.754
13.174239	5.915
13.167078	5.945
13.109102	6.064
13.229409	6.008
13.19824	6.176
13.070701	5.928
13.225847	6.179
13.207679	6.168
13.198759	6.074
13.146407	6.334
13.258523	6.213
12.964695	6.097
13.053467	6.185
12.961097	6.216
12.959629	6.074
12.90504	5.985
13.089271	5.986
13.020193	6.006
13.229759	5.995
13.149541	5.867
13.124296	5.766
13.120504	6.052
13.066298	5.95
13.108007	5.961
13.218143	6.138
13.187318	6.335
13.072773	6.296
13.099156	6.098
13.137991	6.124
13.211781	6.229
13.181734	6.142
13.02027	6.223
13.166377	6.247
13.273868	6.26
13.169862	6.152
13.170098	6.238
13.097822	6.301
13.16158	6.119
13.165646	6.04
13.040154	6.095
12.989184	5.948
13.196375	6.208
13.118261	5.945
13.029772	6.074
13.154012	5.955
13.009972	6.134
13.188745	6.297
13.143646	6.035
13.150856	6.291
13.11688	6.385
13.233182	6.051
13.095741	5.984
13.214822	6.362
13.100749	6.243
13.255783	6.253
13.139966	6.411
13.16763	6.329
13.159596	6.285
13.137759	6.287
13.09401	6.412
13.155681	6.517
13.10727	6.231
13.048934	6.189
13.063092	6.431
13.049057	6.363
13.090081	6.351
13.124108	6.56
13.038504	6.573
13.148831	6.761
13.092312	6.723
13.115974	6.741
13.159429	6.574
13.125739	6.661
13.103073	6.694
12.969624	6.486
12.862574	6.459
13.045096	6.521
13.129695	6.777
13.067416	6.58
13.209422	6.409
13.168695	6.534
13.163916	6.836
12.216549	6.652
12.112413	6.538
12.192639	6.367
12.163912	6.274
12.112731	6.245
12.313745	6.343
12.361964	6.204
12.29959	6.206
12.263507	6.283
12.360182	6.176
12.281501	6.189
12.212939	6.308
12.148298	6.225
12.218893	5.958
12.099857	6.134
12.206336	6.3
12.239491	6.138
12.140678	6.098
12.232117	6.259
12.187221	5.864
12.19577	6.262
12.266429	6.032
12.227312	5.809
12.199668	5.872
12.268726	5.925
12.197692	5.953
12.279321	6.077
12.238937	6.005
12.249013	5.953
12.270242	5.85
12.257	5.958
12.227203	5.822
12.167801	5.759
12.146581	5.73
12.186219	5.69
12.181413	5.686
12.163284	5.606
12.170436	5.617
12.251056	5.722
12.30295	5.696
12.333435	5.663
12.274589	5.649
12.230794	5.548
12.228573	5.407
12.348948	5.335
12.337518	5.328
12.261777	5.397
12.303617	5.609
12.272433	5.474
12.32933	5.569
12.359127	5.572
12.297697	5.681
12.257353	5.603
12.199473	5.693
12.06816	5.637
12.062734	5.711
12.005368	5.652
12.187702	5.744
12.290691	5.744
12.118668	5.653
12.157628	5.742
12.166868	5.625
12.179798	5.595
12.195232	5.68
12.265263	5.825
11.973162	5.676
12.224358	5.72
12.176527	5.757
12.108611	5.79
12.138258	5.573
12.108927	5.609
12.083602	5.805
12.2059	5.642
12.28019	5.811
12.404467	5.578
12.163005	5.386
12.300554	5.53
12.305885	5.519
12.225643	5.362
12.281578	5.332
12.217986	5.311
12.317553	5.372
12.351815	5.439
12.445296	5.662
12.290983	5.663
12.149315	5.831
12.153734	5.643
12.126141	5.506
12.115535	5.616
11.997655	5.639
11.956121	5.667
12.022065	5.671
12.16134	5.646
12.152246	5.491
12.276262	5.524
12.306411	5.573
12.327834	5.663
12.11523	5.576
12.185287	5.649
12.128631	5.672
12.139369	5.498
12.198669	5.508
12.202302	5.492
12.080478	5.629
12.214833	5.673
12.218617	5.695
12.187415	5.477
12.155725	5.516
12.130103	5.688
12.10223	5.723
12.037637	5.85
12.132793	5.792
12.109149	5.779
12.300898	5.359
12.255914	5.496
12.156663	5.549
12.074352	5.651
12.234528	5.568
12.12711	5.702
12.178279	5.717
12.18271	5.713
12.095485	5.688
12.051394	5.577
12.061295	5.76
11.987902	5.709
12.009821	5.548
12.146484	5.491
12.174651	5.627
12.152578	5.557
12.208308	5.639
12.13442	5.478
12.106895	5.583
12.124216	5.721
12.145815	5.723
12.239404	5.65
12.150304	5.582
12.210204	5.477
12.229375	5.698
12.171521	5.637
12.221585	5.697
12.068632	5.504
12.178189	5.605
12.202311	5.738
12.191191	5.709
12.152628	5.561
12.085019	5.483
12.151719	5.443
12.191653	5.52
12.264434	5.547
12.296345	5.675
12.160534	5.659
12.229785	5.553
12.260931	5.481
12.312846	5.538
12.300259	5.551
12.118299	5.549
12.183986	5.518
12.199594	5.522
12.197581	5.476
12.370275	5.324
12.224577	5.321
12.330028	5.443
12.293371	5.387
12.308514	5.265
12.248006	5.239
12.25856	5.189
12.343761	5.276
12.273162	5.339
12.276317	5.494
12.248885	5.382
12.082951	5.473
12.273865	5.467
12.309796	5.472
12.395208	5.306
12.243024	5.315
12.32953	5.321
12.104069	5.587
12.028956	5.5
12.117403	5.398
12.205167	5.395
12.082384	5.264
12.231103	5.239
12.345781	5.367
12.384603	5.251
12.341428	5.171
12.246622	5.326
12.253078	5.215
12.339413	5.315
12.2982	5.394
12.255296	5.364
12.122018	5.232
12.213687	5.411
12.162008	5.407
12.041905	5.212
12.07558	5.301
12.113807	5.204
12.277086	5.451
12.221092	5.407
12.265821	5.609
12.204139	5.747
12.310898	5.7
12.264819	5.481
12.247822	5.662
12.269769	5.647
12.188245	5.719
12.237572	5.785
12.234209	5.617
12.265629	5.766
12.297203	5.575
12.374922	5.528
12.357953	5.468
12.199431	5.423
12.100625	5.487
11.994894	5.707
12.102331	5.638
12.164469	5.461
12.198143	5.536
12.235842	5.729
12.253339	5.665
12.266422	5.643
12.296222	5.599
12.334637	5.69
12.242783	5.759
12.123335	5.667
12.230636	5.824
12.364492	5.764
12.311791	5.76
12.377835	5.666
12.247704	5.767
12.214824	5.698
12.285693	5.679
12.200043	5.607
12.259259	5.863
12.248284	5.962
12.203146	5.855
12.287387	5.795
12.186024	5.872
12.203452	5.846
12.28729	5.782
12.290779	5.851
12.297406	5.764
12.222826	5.776
12.286124	5.659
12.335969	5.704
12.319751	5.709
12.245361	5.838
12.272231	5.787
12.332496	5.859
12.371857	5.708
12.365184	5.55
12.38483	5.531
12.297016	5.401
12.375001	5.324
12.320566	5.509
12.271565	5.376
12.247326	5.523
12.247007	5.555
12.323509	5.81
12.311535	5.745
12.302245	5.59
12.243909	5.549
12.163899	5.694
12.229777	5.784
12.314512	5.819
12.324728	5.861
12.275025	5.948
12.335603	5.83
12.33628	5.961
12.355847	5.892
12.328732	5.778
12.193561	5.477
12.299569	5.734
12.211108	5.643
12.257585	5.681
12.216929	5.613
12.300435	5.558
12.312802	5.729
12.32657	5.831
12.215459	5.93
12.160849	5.774
12.239556	5.695
12.190607	5.64
12.164582	5.612
12.27748	5.632
12.226461	5.553
12.231698	5.614
12.24704	5.578
12.274822	5.652
12.36791	5.57
12.307918	5.679
12.331833	5.752
12.237362	5.876
12.132316	5.955
12.185807	5.801
12.207793	5.696
12.307273	5.707
12.336879	5.777
12.290891	5.715
12.195481	5.809
12.267479	5.832
11.330466	5.704
11.32767	5.951
11.361816	5.708
11.377818	5.865
11.407171	5.859
11.394427	5.734
11.450542	5.566
11.35953	5.491
11.462662	5.415
11.441612	5.395
11.334818	5.384
11.394909	5.203
11.287395	5.228
11.293473	5.082
11.349083	5.207
11.40535	5.294
11.406178	5.129
11.433041	5.318
11.478549	5.312
11.461007	5.194
11.348223	5.186
11.384845	5.15
11.266851	5.268
11.246872	5.112
11.215383	5.07
11.178205	5.173
11.307889	5.011
11.276185	4.992
11.254773	4.896
11.326557	4.922
11.376735	5.125
11.378402	5.186
11.351115	5.177
11.376307	4.98
11.36552	5.178
11.380183	5.128
11.335354	5.025
11.367751	5.245
11.264232	5.413
11.408261	5.648
11.341632	5.504
11.34173	5.584
11.473891	5.26
11.348716	5.274
11.354226	5.194
11.363061	5.234
11.34013	5.122
11.26344	5.194
11.329908	5.093
11.399452	5.057
11.367634	5.006
11.335072	5.015
11.346711	5.089
11.386385	5.118
11.382001	4.979
11.383061	4.984
11.326797	5.02
11.332789	5.157
11.381738	5.135
11.367687	5.179
11.336793	5.281
11.312145	5.186
11.386877	5.214
11.466481	5.116
11.438545	5.42
11.446392	5.244
11.462835	5.25
11.353546	5.456
11.38459	5.386
11.464354	5.421
11.500088	5.181
11.478508	5.187
11.537302	5.18
11.53745	5.266
11.561532	5.301
11.490677	5.196
11.527458	5.093
11.560179	5.124
11.431248	5.135
11.57904	5.25
11.382722	5.036
11.433432	5.087
11.317151	5.299
11.268374	5.338
11.241865	5.261
11.132843	5.193
11.381185	5.102
11.323867	5.113
11.360056	5.137
11.185725	5.249
11.203788	5.315
11.247956	5.165
11.40322	5.112
11.337331	4.971
11.363555	5.063
11.43211	5.075
11.430766	5.103
11.338354	5.082
11.334062	5.081
11.321435	4.849
11.387981	5.044
11.391558	5.03
11.425871	5.026
11.565321	4.995
11.42431	5.134
11.388554	4.933
11.433109	4.904
11.310802	5.142
11.365369	5.036
11.337513	4.834
11.357145	4.984
11.358193	5.193
11.342112	5.234
11.318849	5.18
11.305013	5.102
11.166251	5.031
11.280704	5.146
11.329369	5.19
11.345224	5.335
11.267837	5.26
11.383034	5.45
11.358339	5.373
11.37877	5.32
11.410411	5.291
11.456874	5.406
11.38422	5.448
11.364465	5.313
11.126793	5.213
11.315104	5.121
11.298937	5.078
11.425333	5.232
11.352697	5.45
11.448035	5.326
11.365841	5.218
11.382874	5.143
11.393726	5.16
11.348613	5.024
11.275031	5.059
11.353238	5.353
11.260123	5.216
11.318218	5.099
11.348302	5.172
11.375225	4.988
11.365137	5.24
11.306546	5.235
11.3479	5.172
11.318082	5.044
11.418724	5.057
11.448563	4.888
11.490706	4.948
11.549229	4.958
11.456818	5.151
11.393522	4.932
11.379103	5.264
11.351913	5.241
11.311994	5.279
11.37641	5.201
11.406631	5.32
11.330729	5.287
11.302488	5.246
11.332888	5.247
11.332742	5.038
11.244367	5.003
11.390307	5.23
11.37805	5.042
11.346294	5.019
11.408984	4.954
11.386175	5.104
11.347413	5.069
11.24832	4.571
11.364276	4.662
11.430985	4.611
11.408055	4.48
11.458535	4.68
11.465038	4.643
11.364441	4.789
11.368968	4.85
11.420132	4.513
11.491351	4.526
11.416558	4.527
11.456287	4.486
11.381064	4.442
11.379393	4.218
11.404605	4.356
11.402662	4.364
11.454174	4.265
11.492519	4.309
11.421687	4.459
11.382843	4.529
11.301229	4.607
11.321583	4.34
11.357108	4.346
11.403593	4.29
11.482814	4.276
11.380505	4.214
11.412664	4.274
11.488657	4.424
11.502039	4.572
11.374596	4.63
11.358936	4.771
11.444945	4.928
11.422013	5.048
11.504143	5.093
11.385181	5.298
11.644003	5.513
11.459651	5.212
11.543944	5.145
11.358401	5.134
11.499425	5.081
11.544709	5.198
11.580928	5.081
11.425013	4.936
11.41214	4.887
11.294189	5.024
11.44273	5.134
11.470696	5.135
11.494692	5.121
11.450159	5.179
11.44404	5.07
11.361881	4.963
11.305298	5.066
11.314803	5.012
11.362728	4.928
11.377948	4.907
11.271655	4.893
11.307859	5.165
11.473591	5.151
11.487171	5.137
11.482908	5.048
11.402555	4.935
11.45234	4.896
11.434001	4.99
11.323749	4.935
11.398672	5.066
11.390204	4.972
11.399382	4.927
11.35851	4.757
11.304117	4.869
11.322791	4.703
11.341397	4.987
11.319504	5.002
11.395494	5.083
11.402385	4.84
11.465322	4.893
11.406372	4.954
11.411906	4.844
11.368664	4.749
11.386309	4.946
11.299199	4.813
11.366783	4.94
11.421695	4.933
11.385919	4.995
11.458888	4.854
11.476245	4.89
11.459839	4.96
11.440643	4.911
11.37954	5.004
11.407601	4.826
11.247243	4.959
11.285276	5.025
11.363815	5.022
11.31227	5.108
11.301222	5.223
11.30976	5.235
11.336217	5.08
11.412444	5.146
11.42888	5.202
11.371561	5.199
11.491797	5.246
11.457675	5.421
11.46613	5.409
11.352755	5.307
11.362527	5.388
11.491504	5.308
11.600581	5.201
11.57091	5.129
11.565417	5.463
11.571858	5.077
11.506882	5.153
11.490531	5.117
11.542441	5.2
11.531946	5.185
11.50929	5.017
11.436698	5.083
11.413941	4.929
11.361571	5.144
11.355248	5.076
11.353733	5.104
11.391002	5.037
11.32409	5.149
11.24664	5.088
11.403824	5.175
11.312353	5.16
11.306879	5.272
11.311281	5.073
11.273297	4.9
11.330474	5.016
11.317829	4.951
11.262852	5.094
11.337667	5.095
10.815521	
10.786437	4.915
10.852978	4.956
10.839717	5.035
10.899225	5.047
10.783341	4.824
10.841764	4.747
10.757588	4.853
10.757825	4.892
10.850212	5.04
10.909495	5.077
10.874095	4.87
10.833422	4.85
10.871042	4.754
10.912288	4.941
10.848154	4.966
10.791106	4.769
10.853275	4.776
10.873802	4.772
10.827606	4.734
10.856329	4.826
10.832176	4.74
10.834716	4.684
10.916759	4.567
10.838689	4.833
10.853054	4.799
10.796133	4.817
10.87171	4.791
10.867446	4.708
10.799415	4.825
10.980174	5.087
10.890478	4.811
10.889487	4.745
10.862127	4.652
10.807089	4.727
10.833809	4.89
10.790889	4.935
10.870643	5.056
10.774527	4.961
10.846667	4.838
10.791286	4.816
10.855466	4.812
10.875548	4.911
10.860866	4.681
10.805587	4.494
10.851229	4.705
10.89029	4.638
10.890166	4.685
10.830489	4.895
10.805292	4.809
10.872749	4.741
10.905017	4.867
10.918177	4.767
10.862668	4.799
10.85114	4.513
10.877295	4.799
10.861344	4.678
10.831171	4.675
10.838356	4.617
10.909719	4.578
10.83837	4.964
10.864718	4.625
10.704847	4.437
10.863211	4.646
10.858504	4.607
10.907444	4.488
10.779629	5.071
10.828937	4.49
10.88403	4.578
10.837526	4.6
10.857223	4.544
10.783563	4.585
10.769233	4.676
10.801878	4.687
10.799129	4.587
10.873051	4.775
10.831319	4.673
10.876052	4.546
10.948582	4.442
10.946786	4.592
10.928022	4.492
10.93579	4.461
10.980315	4.514
10.89256	4.613
10.837643	4.463
10.913568	4.579
10.840824	4.751
10.820994	4.681
10.87895	4.739
10.904462	4.701
10.802522	4.639
10.891083	4.564
10.816387	4.533
10.73245	4.599
10.830923	4.63
10.8481	4.392
10.76254	4.515
10.896407	4.404
10.816656	4.32
10.77692	4.337
10.820382	4.366
10.765011	4.419
10.795828	4.525
10.780535	4.39
10.721818	4.563
10.773434	4.391
10.771095	4.48
10.751486	4.687
10.773379	4.585
10.82462	4.666
10.811939	4.512
10.795956	4.485
10.810878	4.417
10.788584	4.339
10.849462	4.573
10.85272	4.406
10.834091	4.501
10.831236	4.528
10.85915	4.692
10.801144	4.656
10.829173	4.515
10.894105	4.496
10.905781	4.541
10.860122	4.419
10.752928	4.278
10.840998	4.466
10.895696	4.901
10.898818	4.57
10.891872	4.513
10.877349	4.433
10.760754	4.512
10.81001	4.502
10.783395	4.472
10.870947	4.62
10.839598	4.58
10.812831	4.66
10.826672	4.79
10.903864	4.729
10.91159	4.739
10.756368	4.865
10.832109	4.862
10.898913	4.804
10.859585	4.852
10.873876	5.009
10.858797	5.057
10.897045	5.024
10.874296	4.81
10.869694	4.679
10.917759	4.652
10.783985	4.698
10.91277	4.727
10.927249	4.887
10.810398	4.93
10.815866	4.835
10.811554	4.923
10.772031	4.908
10.806628	4.961
10.773749	4.819
10.836773	5.075
10.818054	4.818
10.851332	4.98
10.902768	4.991
10.893771	4.899
10.938537	4.797
10.984396	4.896
10.983046	4.851
10.890614	4.795
10.825232	4.951
10.835425	5.08
10.833957	4.887
10.861473	4.94
10.838314	4.8
10.855899	4.65
10.919681	4.808
10.861997	4.767
10.889799	4.69
10.811645	4.495
10.844022	4.607
10.756234	4.516
10.853716	4.643
10.858412	4.65
10.858275	4.861
10.897853	4.77
10.862046	4.641
10.837261	4.565
11.044711	4.737
10.995489	4.808
10.922972	4.869
10.907936	4.761
10.860099	4.979
10.90754	4.837
10.821056	4.844
10.789559	4.843
10.902317	4.757
10.811974	4.767
10.840348	4.721
10.80613	4.869
10.828554	5.034
10.788945	4.832
10.845489	4.929
10.888697	4.85
10.784396	4.87
10.770791	4.703
10.751768	4.839
10.78986	4.777
10.846265	4.768
10.862578	4.775
10.883528	4.553
10.902559	4.642
10.849872	4.501
10.941969	4.686
10.909113	4.651
10.964074	4.539
11.004158	4.509
10.924947	4.764
10.798168	4.724
10.960675	4.819
10.859543	4.651
10.79802	4.872
10.901918	4.805
10.794292	4.83
10.843026	4.883
10.829918	5.072
10.882482	4.906
10.884656	4.774
10.900616	4.866
10.969513	4.762
11.002709	4.828
10.877132	4.983
10.777264	4.929
10.926498	4.68
10.858369	4.901
10.838719	4.639
10.851368	4.71
10.843928	4.534
10.893234	4.646
10.800074	4.669
10.858162	4.651
10.908375	4.707
10.893065	4.451
10.923694	4.575
10.977477	4.771
10.903897	4.628
10.981397	4.771
10.890841	4.686
10.866793	4.775
10.842115	4.638
10.89966	4.753
10.884281	4.745
10.935132	4.791
10.884329	4.878
10.95532	4.842
10.89388	4.727
10.945938	4.624
10.926322	4.563
10.924858	4.447
10.937595	4.475
10.855065	4.49
10.836417	4.703
10.872414	4.529
10.94108	4.409
10.837044	4.556
10.947698	4.532
10.984558	4.554
10.96593	4.594
10.942767	4.577
10.87719	4.821
10.941636	4.781
10.880859	4.815
10.867193	4.894
10.815915	4.902
10.849525	4.715
10.874209	4.844
10.947239	4.61
10.961069	4.697
10.93265	4.638
10.828252	4.641
10.91353	4.698
10.968447	4.527
10.828659	4.676
10.927249	4.901
10.87361	4.652
10.797693	4.708
10.813132	4.503
10.784792	4.41
10.715279	4.477
10.821279	4.543
10.890169	4.545
10.781694	4.356
10.85183	4.259
10.782866	4.472
10.782366	4.623
10.859195	4.761
10.913732	4.768
10.92199	4.836
10.810404	4.833
10.774918	4.864
10.914405	5.335
10.81643	4.847
10.882719	4.809
10.34069	5.031
10.34069	4.384
10.392847	4.562
10.345026	4.512
10.401282	4.489
10.394542	4.421
10.409012	4.413
10.404871	4.401
10.446203	4.458
10.366153	4.675
10.383918	4.595
10.415075	4.482
10.313724	4.554
10.315568	4.628
10.305895	4.585
10.451742	4.485
10.465108	4.532
10.379078	4.557
10.427219	4.404
10.378242	4.477
10.384858	4.413
10.410927	4.418
10.471193	4.317
10.427276	4.432
10.433315	4.394
10.332394	4.327
10.393133	4.35
10.383862	4.431
10.355717	4.327
10.300901	4.437
10.399904	4.368
10.451871	4.472
10.470007	4.535
10.415712	4.461
10.37487	4.245
10.533321	4.289
10.468037	4.106
10.461996	4.338
10.474588	4.215
10.559112	4.147
10.590423	4.755
10.523105	4.362
10.501843	4.434
10.460823	4.283
10.604005	4.321
10.457102	4.248
10.524155	4.238
10.534127	4.375
10.527455	4.837
10.521822	4.461
10.593238	4.519
10.442707	4.521
10.510694	4.506
10.433881	4.419
10.495164	4.435
10.406664	4.581
10.540346	4.562
10.542168	4.728
10.458676	4.717
10.426265	4.629
10.522217	4.527
10.489652	4.47
10.371506	4.407
10.390553	4.445
10.494463	4.594
10.455097	4.743
10.391291	4.649
10.350965	4.544
10.293929	4.384
10.275089	4.75
10.380627	4.705
10.543722	4.542
10.545409	4.387
10.532991	4.511
10.453759	4.626
10.484182	4.569
10.511696	4.784
10.47995	4.837
10.483096	4.838
10.608523	4.721
10.638664	4.543
10.587139	4.503
10.587826	4.569
10.570727	4.62
10.580754	4.57
10.635422	4.752
10.588336	4.428
10.588119	4.605
10.68506	4.734
10.584953	4.54
10.538679	4.556
10.533305	4.476
10.643821	4.524
10.671649	4.481
10.666374	4.584
10.585189	4.435
10.578785	4.547
10.547973	4.565
10.612991	4.761
10.555217	4.701
10.595616	4.879
10.613071	4.737
10.621353	4.672
10.656056	4.814
10.732092	4.731
10.576833	4.948
10.515517	4.533
10.619229	4.6
10.587497	4.705
10.523344	4.474
10.456687	4.654
10.573926	4.666
10.623426	4.505
10.547359	4.448
10.590156	4.347
10.652674	4.481
10.592446	4.299
10.509305	4.39
10.542905	4.547
10.600542	4.555
10.614724	4.587
10.587638	4.383
10.609237	4.272
10.588177	4.414
10.512957	4.244
10.534593	4.415
10.548981	4.255
10.490382	4.183
10.495414	4.081
10.509676	4.064
10.511771	4.645
10.554306	4.201
10.534561	4.292
10.548084	4.634
10.406239	4.369
10.466654	4.243
10.468967	4.287
10.590696	4.452
10.620288	4.475
10.607999	4.348
10.630156	4.629
10.632466	4.445
10.59266	4.644
10.569856	4.639
10.718558	4.788
10.647209	4.637
10.612795	4.473
10.678093	4.408
10.65071	4.524
10.659459	4.424
10.697488	4.192
10.632758	4.109
10.592019	4.318
10.615236	4.287
10.669765	4.328
10.648477	4.36
10.674931	4.317
10.571348	4.359
10.641921	4.274
10.668991	4.388
10.659413	4.416
10.612135	4.508
10.557876	4.572
10.558391	4.449
10.636443	4.527
10.600803	4.622
10.586156	4.66
10.637122	4.462
10.591605	4.336
10.638653	4.306
10.668133	4.168
10.684781	4.194
10.651702	4.392
10.667093	4.435
10.723898	4.445
10.775546	4.552
10.689312	4.705
10.672941	4.486
10.591267	4.553
10.536006	4.778
10.647563	4.764
10.653535	4.526
10.655706	4.537
10.667605	4.39
10.597464	4.377
10.606495	4.165
10.571197	4.2
10.630228	4.344
10.642454	4.214
10.698238	4.144
10.704199	4.113
10.745121	4.355
10.672719	4.609
10.703016	4.534
10.642182	4.643
10.65164	4.465
10.543668	4.452
10.664653	4.407
10.699363	4.655
10.661826	4.499
10.633624	4.549
10.633066	4.419
10.598234	4.374
10.612981	4.469
10.716716	4.501
10.711618	4.431
10.654277	4.285
10.691577	4.504
10.739609	4.569
10.736515	4.651
10.632473	4.401
10.655055	4.637
10.719952	4.497
10.638257	4.542
10.647316	4.335
10.588131	4.295
10.633569	4.471
10.588876	4.266
10.562937	4.232
10.609263	4.169
10.570071	4.222
10.62769	4.156
10.631208	4.095
10.673396	4.214
10.607997	4.236
10.601076	4.36
10.597463	4.41
10.610419	4.48
10.630253	4.39
10.629934	4.341
10.690844	4.362
10.665907	4.554
10.688916	4.712
10.596773	4.638
10.653922	4.705
10.733846	4.566
10.666291	4.583
10.689341	4.492
10.585993	4.735
10.671288	4.598
10.654751	4.553
10.698917	4.615
10.654035	4.683
10.631634	4.232
10.601712	4.482
10.541622	4.439
10.579414	4.434
10.668698	4.397
10.580576	4.518
10.545034	4.41
10.60379	4.326
10.551721	4.319
10.656148	4.41
10.708296	4.397
10.670149	4.519
10.674014	4.662
10.670467	4.697
10.660979	4.386
10.765055	4.586
10.708716	4.55
10.698307	4.58
10.676796	4.789
10.700948	4.757
10.661817	4.719
10.708595	4.645
10.732512	4.66
10.683315	4.623
10.687366	4.768
10.690681	4.668
10.740844	4.58
10.748943	4.591
10.718578	4.416
10.728997	4.473
10.746954	4.409
10.769295	4.542
10.819069	4.752
10.793727	4.662
10.767292	4.758
10.744683	4.598
10.731024	4.677
10.656768	4.659
10.652954	4.412
10.615891	4.469
10.700399	4.55
10.600275	4.275
10.70468	4.379
10.762083	4.205
10.744445	4.407
10.678741	4.372
10.643041	4.378
10.541903	4.486
10.533183	4.561
10.652141	4.727
10.629561	4.655
10.651999	4.614
10.672837	4.599
10.711038	4.462
10.722575	4.469
10.744149	4.613
10.699825	4.452
10.735077	4.699
9.625242	4.477
9.622412	4.529
9.704811	4.507
9.628693	4.647
9.643384	4.654
9.60815	4.498
9.648414	4.641
9.640201	4.653
9.667151	4.422
9.648772	4.447
9.646164	4.341
9.623279	4.339
9.657064	4.416
9.62352	4.55
9.620522	4.398
9.637644	4.651
9.653417	4.45
9.49954	4.431
9.50508	4.541
9.610877	4.418
9.566751	4.455
9.589503	4.326
9.584773	4.398
9.549962	4.294
9.476886	4.456
9.509971	4.336
9.553231	4.398
9.51649	4.266
9.623916	4.194
9.632325	4.113
9.573247	4.214
9.591568	4.17
9.573167	4.227
9.510832	4.155
9.580871	4.055
9.481123	4.055
9.610566	4.219
9.659654	4.365
9.463069	4.293
9.631744	4.008
9.640663	4.201
9.626211	4.153
9.693296	4.221
9.690789	4.246
9.653425	4.164
9.597303	4.222
9.669501	4.262
9.557287	4.13
9.592179	4.128
9.595641	4.021
9.616134	4.07
9.57184	4.091
9.590539	4.107
9.612088	3.947
9.636024	4.161
9.579216	3.849
9.66793	3.945
9.651103	4.155
9.655325	3.961
9.650754	3.892
9.642459	3.815
9.651996	3.887
9.690008	3.921
9.659822	3.718
9.682021	3.889
9.746265	3.963
9.583522	3.932
9.518769	3.854
9.647398	3.857
9.698859	3.907
9.739867	4.118
9.728525	4.184
9.659479	4.191
9.752707	4.501
9.649973	4.368
9.708176	4.576
9.683419	4.538
9.690309	4.392
9.610237	4.404
9.66353	4.261
9.668826	4.363
9.661995	4.319
9.649946	4.503
9.69773	4.343
9.64449	4.219
9.651437	4.214
9.705054	4.311
9.675136	4.267
9.732789	4.197
9.780873	4.069
9.661526	4.226
9.783111	4.26
9.680132	4.296
9.748251	4.139
9.616467	4.144
9.663764	3.979
9.608123	4.034
9.61963	3.955
9.621191	4.052
9.597769	4.101
9.638258	4.123
9.703311	3.992
9.647177	3.772
9.676931	3.92
9.610857	3.919
9.700105	3.982
9.661839	4.036
9.671488	3.962
9.691107	4.037
9.766002	4.079
9.665747	4.028
9.703656	4.109
9.775168	4.136
9.669922	4.051
9.72649	4.112
9.709056	4.116
9.755197	4.043
9.752811	3.968
9.797723	3.887
9.712309	4.062
9.729883	4.052
9.672672	3.972
9.705867	4.057
9.782941	3.984
9.74795	4.051
9.72666	4.021
9.765519	4.338
9.720137	4.392
9.751783	4.411
9.654214	4.472
9.713982	4.345
9.72662	4.212
9.702262	4.334
9.701468	4.062
9.601999	4.11
9.646625	4.168
9.640091	4.109
9.68957	4.099
9.680696	3.965
9.703421	3.91
9.737497	4.153
9.746532	4.157
9.83814	4.012
9.742173	4.279
9.68589	3.998
9.71581	4.084
9.786764	3.948
9.814344	4.243
9.733344	4.134
9.811425	4.016
9.843785	4.184
9.848751	4.283
9.843211	4.076
9.770203	4.141
9.755067	4.126
9.737661	4.22
9.789812	4.083
9.799681	4.001
9.646671	4.113
9.633459	4.084
9.773213	3.997
9.774104	4.085
9.694186	4.197
9.742321	4.132
9.715544	4.144
9.742141	3.958
9.709711	4.172
9.73233	4.185
9.807016	4.024
9.889118	4.031
9.7593	4.274
9.694398	4.346
9.708777	4.32
9.743089	4.317
9.736592	4.228
9.756145	4.187
9.827299	4.251
9.808935	4.179
9.830108	4.185
9.761987	4.288
9.744192	4.208
9.762013	4.392
9.723314	4.246
9.66736	4.349
9.652835	4.393
9.686763	4.352
9.788977	4.35
9.765513	4.154
9.79113	4.253
9.788066	4.114
9.657522	3.972
9.731456	4.126
9.695641	4.089
9.731253	3.934
9.739053	3.936
9.71628	4.056
9.699278	4.108
9.734895	4.074
9.691185	4.172
9.734792	4.072
9.799223	4.108
9.814109	4.175
9.748752	4.326
9.792271	4.084
9.801911	4.205
9.725004	4.119
9.77229	4.111
9.769365	4.077
9.845128	4.058
9.756464	4.184
9.786717	4.335
9.884035	4.093
9.865968	4.303
9.743485	4.064
9.803004	3.968
9.767708	4.132
9.725065	4.422
9.83897	4.17
9.821298	4.006
9.802834	3.991
9.786917	4.056
9.798007	4.032
9.775368	4.059
9.77308	4.096
9.808048	4.051
9.737586	4.011
9.769567	3.97
9.749152	4.018
9.772545	4.111
9.801864	4.309
9.805833	4.293
9.920819	4.287
9.808009	4.16
9.814008	4.182
9.847437	4.076
9.805265	3.969
9.811501	3.881
9.831329	3.949
9.81646	3.987
9.788138	4.554
9.862302	3.952
9.896388	3.935
9.913156	3.896
9.8615	3.759
9.899397	3.869
9.834607	4.025
9.860011	3.891
9.853874	4.079
9.869341	3.885
9.859517	3.952
9.810156	3.82
9.872858	3.84
9.858618	4.075
9.923876	4.16
9.935199	3.855
9.919005	3.843
9.857	3.888
9.732385	3.859
9.853146	4.111
9.87825	4.167
9.894685	4.055
9.829533	4.1
9.861537	4.09
9.833183	3.975
9.830699	4.058
9.816042	3.985
9.800905	4.036
9.741003	4.135
9.753336	4.128
9.898852	4.17
9.804924	4.222
9.877895	4.174
9.864523	4.262
9.810166	4.099
9.810035	4.14
9.86598	3.898
9.863661	4.122
9.891859	3.956
9.882643	3.912
9.973754	4.125
9.825206	4.146
9.881602	4.229
9.876613	4.344
9.866033	4.521
9.863378	4.297
9.836738	4.392
9.84905	4.329
9.862453	4.161
9.879899	4.062
9.878352	4.001
9.851239	3.873
9.876063	4.073
9.943266	4.185
9.999848	4.285
9.932294	4.342
9.983692	4.305
9.927063	4.365
9.9175	4.243
9.81402	4.318
9.903712	4.34
9.077165	4.406
9.099063	4.35
9.183217	4.327
9.072755	4.48
9.034149	4.406
9.043928	4.517
9.018841	4.442
9.045604	4.408
9.133784	4.407
9.047565	4.331
9.001643	4.35
9.080599	4.303
9.142741	4.45
9.113777	4.511
9.072458	4.311
9.077863	4.653
9.126285	4.475
9.14623	4.798
9.122751	4.532
9.053884	4.314
9.096588	4.483
9.162238	4.568
9.055839	4.458
9.05996	4.479
9.094229	4.376
9.0581	4.399
9.081877	4.503
9.107769	4.338
9.090074	4.114
9.104471	4.18
9.034224	4.168
9.100964	4.482
9.012392	4.186
9.083544	4.175
9.126461	4.231
9.156242	4.38
9.082973	4.397
9.024098	4.777
9.115075	4.343
9.007334	4.353
9.015002	4.368
9.027634	4.361
9.173776	4.373
9.096359	4.218
9.108249	4.139
9.131862	4.103
9.061634	3.963
9.120668	3.966
9.13477	3.993
9.142502	3.986
9.025236	4.159
9.012352	4.185
9.064462	4.207
9.043549	4.15
9.081376	4.245
9.110153	3.998
9.147224	4.13
9.124991	4.16
9.033222	4.193
9.083164	3.776
9.088405	3.858
8.988067	3.897
9.057466	3.906
9.036076	3.899
9.023186	3.983
9.026651	4.242
9.139629	4.063
9.101413	4.133
9.093274	3.978
9.073686	4.105
9.071874	4.032
9.068611	4.183
9.144973	4.102
9.061011	4.011
9.040471	4.035
9.135124	3.85
9.184896	4.173
9.162443	4.166
9.183374	4.178
9.118524	4.131
9.121637	4.198
9.105624	4.033
9.16598	3.978
9.110858	4.154
9.146412	4.157
9.108425	4.157
9.200126	4.289
9.074418	4.196
9.128935	3.989
9.1502	3.808
9.200032	4.086
9.129797	4.152
9.154199	4.463
9.185034	4.149
9.15168	4.15
9.160019	4.273
9.119621	4.065
9.257911	4.132
9.203555	4.053
9.150872	4.344
9.180226	4.272
9.104989	4.292
9.105948	4.077
9.162015	4.09
9.141794	3.998
9.147988	4.046
9.247853	3.957
9.217153	4.169
9.223071	4.126
9.152767	4.335
9.15166	4.301
9.201674	4.22
9.134676	4.318
9.194209	4.31
9.177908	4.395
9.167268	4.398
9.151265	4.314
9.158896	4.292
9.243202	4.425
9.188099	4.092
9.110545	4.23
9.087826	4.322
9.066462	4.132
9.118875	4.365
9.18355	4.437
9.216438	4.392
9.227678	4.368
9.167844	4.504
9.214532	4.455
9.236536	4.294
9.244019	4.514
9.226339	4.559
9.208553	4.377
9.25244	4.327
9.238647	4.074
9.209187	4.336
9.210144	4.298
9.240346	4.144
9.160263	4.478
9.231668	4.486
9.138174	4.61
9.201335	4.777
9.223321	4.492
9.229561	4.538
9.203957	4.375
9.205258	4.145
9.240256	4.381
9.217741	4.341
9.278302	4.535
9.210626	4.346
9.256952	4.218
9.21986	4.289
9.172696	4.194
9.193128	4.202
9.190881	4.28
9.248664	4.13
9.197475	4.168
9.111945	4.259
9.119165	4.311
9.061168	4.321
9.171362	4.271
9.192259	4.35
9.144126	4.752
9.115808	4.551
9.194404	4.609
9.169123	4.721
9.178579	4.524
9.201679	4.618
9.167955	4.572
9.191741	4.627
9.231886	4.558
9.173102	4.477
9.181019	4.519
9.280002	4.495
9.178193	4.34
9.267948	4.509
9.194655	4.436
9.174611	4.454
9.169988	4.718
9.194068	4.759
9.241371	4.797
9.261096	4.74
9.299621	4.906
9.275946	4.769
9.270927	4.779
9.261936	4.732
9.177706	4.948
9.178217	4.766
9.142223	4.99
9.156223	4.857
9.156618	4.813
9.224598	4.907
9.145492	4.639
9.164219	4.588
9.236575	4.7
9.179897	4.692
9.225461	4.651
9.193425	4.559
9.236618	4.631
9.214889	4.515
9.294806	4.658
9.246879	4.668
9.212863	4.436
9.183906	4.494
9.179587	4.458
9.121349	4.489
9.1528	4.715
9.137032	4.568
9.114495	4.581
9.255757	4.625
9.158029	4.603
9.197109	4.87
9.20651	4.506
9.23403	4.837
9.198382	4.759
9.287394	4.809
9.211054	4.828
9.189912	4.759
9.189435	4.701
9.216093	5.115
9.234425	5.114
9.246538	5.003
9.226662	5.295
9.235276	5.106
9.211597	4.92
9.272246	4.678
9.195573	4.59
9.243561	4.69
9.148063	4.709
9.215055	4.74
9.271022	4.776
9.288494	4.876
9.339717	5.055
9.327173	4.74
9.337422	4.681
9.264266	4.717
9.282599	4.91
9.334484	5.232
9.342202	4.866
9.341145	4.689
9.337313	4.588
9.395841	4.803
9.368078	4.585
9.323581	4.601
9.310922	4.594
9.322837	4.434
9.322886	4.568
9.222172	4.463
9.208474	4.437
9.306316	4.373
9.407603	4.489
9.302782	4.417
9.319809	4.461
9.307799	4.27
9.306819	4.487
9.283429	4.403
9.29006	4.645
9.319784	4.605
9.278912	4.503
9.356247	4.537
9.258068	4.658
9.301211	4.705
9.223609	4.651
9.274391	4.988
9.181124	4.865
9.277418	4.677
9.274294	4.562
9.268259	4.833
9.355678	4.877
9.243398	4.965
9.305371	4.835
9.287164	4.924
9.298144	4.655
9.26828	4.849
9.320478	4.672
9.278975	4.372
9.278599	4.427
9.217773	4.545
9.226298	4.59
9.26198	4.591
9.294988	4.69
9.329146	4.793
9.306529	4.625
9.249321	4.515
9.273888	4.587
9.331746	4.544
9.297736	4.702
9.273998	4.491
9.218636	4.689
9.321843	4.535
9.231422	4.65
9.298299	4.725
9.333372	4.614
9.227402	4.687
9.211789	4.934
9.277191	4.653
9.294775	4.614
9.304895	4.748
9.258841	4.794
9.308732	4.996
8.400989	5.144
8.310941	5.177
8.310878	5.414
8.314821	5.163
8.275941	5.06
8.265842	5.25
8.305474	5.33
8.318565	4.895
8.293285	5.137
8.285067	4.853
8.311286	4.989
8.268767	4.894
8.267183	4.86
8.262522	4.924
8.23804	5.01
8.252155	4.992
8.28124	5.057
8.340722	4.889
8.220678	4.952
8.266823	5.112
8.254751	4.893
8.36522	4.726
8.288582	5.18
8.289685	4.823
8.282055	4.777
8.300984	5.098
8.253381	4.958
8.279085	5.058
8.33579	5.051
8.245418	4.929
8.278055	5.034
8.212552	4.799
8.314319	4.942
8.420049	5.002
8.359638	5.146
8.292105	4.878
8.332967	5.057
8.321344	4.956
8.116027	4.834
8.156523	4.761
8.162522	4.982
8.139148	4.826
8.29703	5.006
8.335185	4.768
8.270432	4.604
8.207174	4.61
8.243372	4.799
8.248695	4.698
8.388683	4.776
8.260605	4.779
8.258267	4.631
8.301301	4.737
8.281356	4.923
8.217657	5.139
8.280297	5.063
8.334068	4.789
8.212755	4.719
8.26259	4.697
8.357422	4.787
8.208463	4.642
8.307094	4.761
8.257055	5.017
8.169345	4.682
8.234308	4.768
8.184976	4.865
8.287005	4.93
8.199235	4.806
8.303015	4.925
8.235545	5.008
8.300429	4.858
8.299472	5.31
8.260237	5.223
8.285747	4.981
8.250716	4.755
8.252075	4.996
8.295942	5.399
8.314483	5.181
8.223673	4.843
8.258889	4.911
8.237698	5.189
8.238662	5.455
8.270862	5.294
8.162466	5.21
8.201336	4.983
8.209734	4.996
8.388966	5.155
8.200677	5.111
8.179776	5.014
8.266391	5.153
8.321084	4.927
8.322261	4.793
8.33048	4.832
8.248912	4.982
8.255802	5.018
8.316927	4.793
8.293638	4.721
8.302366	4.381
8.199769	4.645
8.137784	4.627
8.203809	4.515
8.157174	4.685
8.136782	4.411
8.253584	4.569
8.288236	4.696
8.399903	4.61
8.294138	4.829
8.327686	5.075
8.168106	4.977
8.254265	4.78
8.211366	4.793
8.235219	4.522
8.28521	4.588
8.197547	4.569
8.223732	4.585
8.206894	4.851
8.235409	4.522
8.246389	4.559
8.250277	4.677
8.34023	4.571
8.304984	4.443
8.297582	4.639
8.240604	4.546
8.322671	4.804
8.2111	4.445
8.260026	4.132
8.231206	4.264
8.322341	4.511
8.351301	4.481
8.285802	4.946
8.358934	4.994
8.333098	4.745
8.373592	4.867
8.278723	4.848
8.366976	4.818
8.263179	4.906
8.313371	5.247
8.266329	4.943
8.22683	4.832
8.28744	4.901
8.266426	5.031
8.283853	4.839
8.330954	5.18
8.326032	5.139
8.242287	5.085
8.285262	4.97
8.310056	5.122
8.308256	4.899
8.425698	4.864
8.288976	4.901
8.225283	4.932
8.283808	4.892
8.243695	4.862
8.243267	5.097
8.286572	5.2
8.309401	5.103
8.297182	4.807
8.347555	4.868
8.310176	5.101
8.367721	5.074
8.312103	4.986
8.263301	5.008
8.311617	4.861
8.365005	4.963
8.287866	5.103
8.319342	4.934
8.332657	4.841
8.303254	4.835
8.259283	4.754
8.240401	4.898
8.290172	4.78
8.324702	4.658
8.254665	4.811
8.25008	4.789
8.268982	4.684
8.290308	4.983
8.228672	4.756
8.217907	4.735
8.265235	4.686
8.360566	4.688
8.356241	4.989
8.33851	4.861
8.230901	4.761
8.335499	4.9
8.303498	4.76
8.292745	4.857
8.239583	4.861
8.323398	5.121
8.299205	4.961
8.302118	5.158
8.288236	5.244
8.261794	5.458
8.274594	5.526
8.281053	5.655
8.321393	5.258
8.327354	5.21
8.301413	5.496
8.288195	5.204
8.307402	5.353
8.289523	5.522
8.25295	5.104
8.311913	4.918
8.301362	5.051
8.299685	4.935
8.349723	4.956
8.324513	4.856
8.203684	5.063
8.198882	4.846
8.201108	4.86
8.243347	4.933
8.230347	4.889
8.296335	5.117
8.207451	4.997
8.226073	4.938
8.22876	5.359
8.211917	4.993
8.22067	4.925
8.208976	4.991
8.186199	4.715
8.172762	4.993
8.139113	4.952
8.218887	5.059
8.248866	5.206
8.330922	4.741
8.285085	4.953
8.233838	4.778
8.144674	4.859
8.203136	5.05
8.179224	4.915
8.118464	4.997
8.084348	5.048
8.25	5.084
8.295985	5.373
8.211368	5.291
8.176624	5.117
8.158903	5.115
8.131396	5.034
8.226253	5.296
8.132866	5.11
8.122771	5.048
8.199998	4.955
8.069019	5.092
8.110477	4.962
8.062499	5.168
8.068205	4.971
7.997986	4.941
8.025955	4.972
7.961774	5.007
7.959229	5.286
8.024943	5.018
8.124864	5.063
8.129038	4.995
8.200191	5.037
8.168438	4.97
8.062732	5.394
8.107546	5.074
8.090875	4.985
8.037471	5.121
8.104722	5.13
8.128619	5.083
8.024909	5.217
7.948004	5.17
8.047711	5.311
8.086918	5.276
8.053471	5.405
8.023019	5.14
8.029602	5.04
8.074048	5.198
8.093558	4.652
7.989011	4.577
8.064531	4.347
7.991398	4.491
8.004887	4.683
7.998207	4.779
8.071982	4.908
8.163853	4.984
8.183979	4.775
8.008286	4.785
8.058317	4.609
8.17086	4.736
8.074985	4.719
8.101126	4.809
7.999857	4.689
7.952991	4.68
7.887295	4.829
8.053794	4.723
8.068369	4.698
8.029595	4.911
8.147987	4.871
8.115073	4.852
8.110669	4.792
8.006839	4.697
8.017525	4.906
8.036302	4.923
8.015053	4.539
8.194459	4.583
8.10015	4.782
8.00773	4.76
8.116524	4.663
8.182712	4.686
8.144885	4.861
8.200158	4.943
7.704218	4.881
7.686324	5.058
7.711769	4.96
7.664879	4.957
7.679948	4.87
7.735239	4.887
7.726435	4.804
7.695755	4.879
7.701006	4.716
7.647623	4.612
7.693019	4.673
7.67668	4.624
7.745238	4.707
7.756378	4.786
7.688002	4.783
7.72387	4.751
7.689393	4.67
7.686146	4.951
7.698363	4.96
7.637914	5.11
7.624099	5.214
7.710072	4.898
7.741278	4.639
7.694798	4.719
7.674511	4.793
7.645949	4.938
7.674325	4.847
7.634083	4.723
7.684101	4.989
7.757545	5.068
7.681652	4.742
7.662721	4.867
7.709449	4.785
7.685698	4.663
7.709634	4.869
7.703357	4.657
7.694943	4.893
7.675005	4.965
7.723855	4.965
7.656216	5.054
7.715234	4.987
7.704692	4.782
7.637741	4.807
7.769679	4.801
7.645909	4.579
7.666359	4.653
7.679842	4.33
7.763372	4.535
7.682331	4.357
7.768698	4.916
7.76837	4.879
7.706369	5.22
7.771307	5.085
7.668361	5.187
7.63799	4.972
7.573897	4.817
7.710386	4.567
7.640757	4.58
7.680957	4.29
7.682252	4.674
7.594225	4.685
7.594576	4.68
7.670456	4.641
7.68209	4.869
7.670483	4.845
7.633756	4.537
7.673291	4.455
7.747059	4.518
7.722911	4.489
7.73062	4.371
7.769341	4.794
7.760093	4.574
7.698156	5.092
7.73754	5.167
7.627899	5.549
7.727344	5.319
7.741941	4.92
7.634835	5.212
7.666359	4.938
7.601137	4.694
7.700173	4.775
7.5886	4.805
7.646673	4.81
7.715923	4.809
7.569617	4.379
7.625607	4.539
7.668761	4.931
7.635308	5.032
7.650888	5.085
7.670839	4.992
7.67552	4.644
7.538678	4.567
7.716367	4.657
7.633597	4.889
7.639103	4.937
7.618401	4.566
7.667966	4.597
7.549334	4.812
7.696063	4.466
7.630978	4.677
7.565699	4.705
7.53287	4.736
7.569376	4.844
7.613181	4.968
7.58504	4.765
7.529825	4.761
7.662553	4.533
7.52006	4.353
7.5607	4.671
7.595837	4.441
7.514049	4.443
7.591399	4.853
7.671195	4.795
7.604842	5.138
7.604048	4.723
7.642382	4.373
7.5578	4.471
7.623734	4.722
7.590569	4.48
7.661503	3.779
7.568545	3.968
7.605499	4.379
7.604164	4.254
7.701485	4.369
7.641848	4.509
7.526866	4.556
7.637503	3.579
7.540826	4.703
7.501198	4.444
7.580242	4.575
7.605755	4.595
7.615827	4.747
7.633295	4.695
7.609519	4.538
7.705167	4.676
7.569765	4.453
7.586664	4.776
7.658111	4.795
7.603836	4.52
7.670214	4.482
7.638003	4.475
7.602147	4.365
7.741198	4.08
7.681952	4.366
7.749866	4.378
7.640965	4.158
7.604371	4.061
7.643239	3.858
7.654931	4.061
7.704345	3.829
7.643452	3.799
7.699624	3.795
7.630497	3.845
7.570456	3.548
7.645711	3.541
7.716571	3.312
7.634725	3.146
7.676579	2.948
7.629142	2.821
7.721052	2.946
7.652461	2.436
7.682154	2.642
7.691876	2.869
7.61968	2.611
7.632322	2.658
7.650418	2.613
7.619493	1.995
7.641279	2.338
7.726158	2.143
7.751777	2.413
7.658643	2.222
7.680634	2.332
7.620773	2.466
7.668816	2.417
7.716524	2.594
7.645187	2.363
7.693827	2.21
7.649089	2.104
7.588773	2.459
7.575746	2.39
7.63398	2.114
7.606636	2.257
7.639417	2.362
7.614157	2.173
7.655238	2.074
7.588436	2.497
7.514703	2.946
7.64358	3.323
7.652247	2.262
7.569774	2.416
7.622104	2.286
7.633906	3.567
7.695385	2.199
7.597311	2.477
7.699628	2.23
7.700193	1.896
7.650469	2.391
7.573148	2.158
7.634974	2.262
7.665163	2.389
7.66568	2.304
7.57708	2.122
7.643808	2.311
7.621199	2.161
7.583159	2.159
7.585342	2.473
7.666916	2.268
7.652335	2.243
7.55017	2.205
7.618342	1.835
7.699028	1.853
7.678204	1.756
7.654393	1.717
7.66444	1.848
7.608213	1.646
7.584612	1.805
7.589505	1.861
7.551758	1.913
7.582555	1.878
7.645421	2.102
7.666409	1.855
7.61005	1.823
7.650458	2.033
7.679347	2.259
7.679121	2.347
7.65823	2.269
7.681265	2.126
7.636419	2.138
7.639685	2.416
7.652458	2.048
7.608884	2.035
7.660593	2.093
7.683041	2.509
7.686536	2.46
7.599244	2.294
7.577131	2.478
7.58777	2.509
7.650903	2.507
7.699812	2.443
7.688815	2.2
7.65628	2.25
7.584719	2.137
7.572464	2.051
7.626483	2.091
7.606318	1.96
7.647001	1.825
7.604332	2.178
7.549076	2.047
7.554749	1.892
7.597926	1.963
7.584579	2.196
7.645732	2.32
7.619173	2.23
7.617117	2.326
7.629475	2.398
7.681905	2.5
7.62809	2.307
7.681332	2.146
7.567748	2.288
7.609795	1.993
7.560967	2.251
7.582604	2.353
7.556408	2.063
7.661133	2.34
7.597106	2.143
7.658699	2.117
7.635265	1.899
7.620501	2.139
7.603884	2.427
7.587721	2.31
7.599416	2.184
7.635532	2.408
7.599074	2.154
7.600584	2.161
7.651257	2.104
7.624176	1.86
7.597201	1.815
7.669449	2.144
7.616019	2.292
7.601632	1.884
7.598279	2.155
7.587563	1.946
7.624333	1.841
7.654556	1.761
7.597187	1.533
7.628749	1.764
7.643792	1.691
7.583097	1.6
7.555177	2.067
7.561083	2.334
7.622104	2.202
7.533107	2.167
7.566719	2.386
7.489465	1.902
7.495266	1.959
7.487872	1.867
7.60456	1.968
7.568405	
7.636894	
7.505319	
7.562413	
	
