# Supplementary material for: The role of scaffold reshaping and disassembly in dynamin driven membrane fission
Source: eLife journal article supplement (doi:10.7554/elife.39441), 2018-12-18
Supplement: supp [file elife-39441-supp-v1.zip › elife_poa_e39441_Figure_2_source_data_2.txt]

#  DATA FILE for Fig. 2f in the paper
#
#      "The role of scaffold reshaping and disassembly
#       in dynamin driven membrane fission"
#
#  by Martina Pannuzzo, Zachary A. McDargh, and Markus Deserno
#
#  published in eLife
#
#  -------------------------------------------------------------
#  Fission driven by CONSTRICTION, ROTATION, and ELONGATION
#  -------------------------------------------------------------
#  
#  Column 1: R  (scaffold radius, in units of sigma)
#  Column 2: Rg (gyration radius of neck, in units of sigma)
#  
17.807503	11.76
17.807503	11.539
17.718808	11.461
17.64464	11.507
17.589156	11.469
17.579751	11.268
17.818223	11.252
17.768975	11.327
17.565459	11.256
17.384953	11.348
17.507096	11.289
17.58189	11.142
17.669928	11.29
17.638942	11.345
17.630809	11.2
17.720268	11.112
17.441473	11.191
17.286012	11.182
17.28684	11.252
17.347732	11.263
17.376085	11.217
17.456257	11.15
17.580185	11.158
17.584215	11.102
17.671244	11.045
17.765663	10.87
17.686253	10.795
17.605636	10.892
17.687056	10.891
17.43496	10.826
17.410207	10.929
17.61758	10.89
17.686082	10.886
17.729663	10.779
17.825463	10.907
17.813947	10.84
17.921683	10.731
17.89762	10.588
18.047691	10.552
17.937444	10.649
17.911977	10.684
17.964735	10.631
17.900977	10.635
17.929614	10.62
17.8841	10.61
17.844093	10.698
17.645949	10.725
17.546003	10.736
17.603825	10.702
17.632551	10.629
17.81137	10.639
17.845664	10.671
17.815867	10.76
17.855194	10.773
17.832519	10.739
17.637784	10.796
17.716904	10.796
17.71889	10.68
17.526873	10.69
17.568005	10.674
17.548865	10.673
17.472584	10.85
17.622687	10.801
17.618686	10.83
17.626236	10.805
17.733979	10.895
17.778419	10.964
17.754913	10.707
17.691098	10.739
17.726084	10.713
17.775759	10.571
17.614852	10.801
17.740716	10.766
17.48133	10.739
17.439397	10.824
17.610774	10.796
17.631409	10.84
17.596349	10.855
17.525543	10.706
17.556094	10.657
17.574233	10.741
17.633331	10.628
17.553449	10.713
17.498952	10.679
17.495154	10.662
17.598181	10.585
17.427828	10.54
17.66525	10.492
17.62967	10.492
17.762265	10.49
17.730098	10.482
17.789616	10.587
17.827107	10.521
17.804772	10.401
17.778199	10.427
17.547052	10.574
17.493977	10.613
17.606075	10.497
17.526315	10.561
17.740789	10.721
17.771771	10.644
17.788964	10.761
17.609839	10.653
17.728991	10.738
17.626466	10.603
17.530171	10.474
17.621605	10.568
17.479651	10.507
17.601845	10.52
17.792222	10.547
17.790622	10.592
17.849125	10.756
17.779699	10.561
17.716597	10.559
17.682292	10.5
17.807727	10.5
17.529068	10.492
17.366314	10.488
17.255312	10.584
17.084681	10.509
17.354697	10.539
17.567992	10.406
17.611296	10.216
17.599365	10.445
17.533307	10.456
17.427706	10.562
17.390104	10.579
17.535542	10.609
17.499968	10.492
17.56478	10.484
17.65275	10.522
17.553741	10.542
17.586158	10.463
17.689405	10.573
17.533207	10.566
17.645979	10.741
17.59486	10.499
17.677593	10.547
17.622663	10.6
17.657385	10.544
17.697651	10.454
17.905967	10.43
17.862706	10.508
17.785768	10.446
17.706175	10.318
17.746125	10.371
17.811154	10.342
17.789269	10.35
17.875443	10.492
17.750216	10.448
17.860606	10.494
17.512876	10.509
17.63494	10.511
17.608288	10.556
17.521345	10.431
17.643029	10.417
17.604786	10.447
17.485062	10.522
17.624361	10.592
17.836841	10.508
17.816536	10.51
17.699479	10.513
17.723989	10.612
17.690466	10.6
17.47393	10.569
17.524378	10.645
17.554844	10.801
17.757835	10.808
17.59279	10.848
17.580859	11.055
17.749525	10.906
17.742835	10.84
17.397431	10.913
17.671731	10.853
17.372327	10.706
17.643558	10.652
17.829271	10.641
17.722354	10.617
17.79654	10.751
17.802008	10.696
17.834522	10.691
17.641978	10.859
17.825819	10.792
17.790568	10.762
17.746263	10.784
17.739238	10.733
17.702794	10.715
17.69871	10.738
17.496483	10.71
17.291054	10.763
17.448816	10.736
17.507773	10.746
17.552977	10.783
17.816897	10.868
17.844767	10.9
17.73061	10.876
17.609256	10.861
17.269452	10.886
17.400776	10.947
17.370295	10.929
17.590221	11.039
17.413378	11.104
17.343288	10.982
17.39277	11.018
17.463013	10.876
17.240938	10.818
17.376123	10.982
17.172995	10.834
17.526427	10.864
17.392904	10.771
17.533037	10.839
17.461671	10.811
17.304055	10.792
17.517586	10.89
17.549475	10.797
17.504409	10.727
17.685086	10.685
17.348988	10.704
17.461337	10.728
17.476847	10.646
17.479499	10.727
17.427035	10.665
17.364392	10.589
17.474	10.624
17.296339	10.756
17.309199	10.552
17.302021	10.643
17.424527	10.727
17.515962	10.645
17.542137	10.666
17.430994	10.836
17.556887	10.817
17.62976	10.611
17.643013	10.65
17.772523	10.606
17.67148	10.541
17.710927	10.6
17.678364	10.439
17.659519	10.659
17.713788	10.595
17.658992	10.609
17.411913	10.699
17.556844	10.708
17.626227	10.697
17.608052	10.64
17.578137	10.617
17.564808	10.532
17.537401	10.546
17.461155	10.591
17.385697	10.632
17.556206	10.576
17.31706	10.549
17.324994	10.545
17.402715	10.39
17.46597	10.323
17.47651	10.41
17.335924	10.26
17.494994	10.25
17.346118	10.137
17.556386	10.138
17.665848	10.258
17.718539	10.206
17.333176	10.242
17.190759	10.343
17.186966	10.287
17.596089	10.272
17.650013	10.211
17.489477	10.162
17.489178	10.202
17.611251	10.092
17.544827	10.125
17.511343	10.141
17.551731	10.189
17.378806	10.362
17.492976	10.432
17.535877	10.263
17.462964	10.279
17.322601	10.333
17.374856	10.34
17.364127	10.331
17.245067	10.297
17.371747	10.375
17.322941	10.239
17.338057	10.255
17.197354	10.194
17.35663	10.049
17.622584	10.099
17.506365	10.074
17.635411	10.114
17.659662	10.14
17.627125	10.184
17.657732	10.086
17.617208	10.055
17.58861	10.136
17.594633	10.043
17.594814	10.155
17.56023	10.015
17.624403	9.955
17.504425	10.071
17.62557	10.202
17.64089	10.263
17.033365	10.121
16.920523	10.108
16.973479	10.028
16.930204	9.964
16.970615	9.913
17.074271	9.913
16.991613	9.899
16.902989	9.765
16.917618	9.62
16.908726	9.881
17.061882	9.815
16.997396	9.855
16.859091	9.894
16.958654	9.765
17.033837	9.787
16.976458	9.794
17.081292	9.798
17.143615	9.571
16.907734	9.549
16.889983	9.697
17.052545	9.717
17.05616	9.866
17.02753	9.872
16.874397	9.698
16.97652	9.753
17.049488	9.821
17.149056	9.738
17.110968	9.894
17.138858	9.875
16.995332	9.81
16.942321	9.843
16.848828	9.786
16.862223	9.718
16.800633	9.759
16.885611	9.781
16.881448	9.788
16.866288	9.793
16.99842	9.865
16.9574	9.96
17.018149	10.011
17.042635	10.047
17.064389	10.015
16.936575	10.104
17.033712	9.962
17.09627	10.067
17.050505	9.931
17.00632	9.891
16.946561	9.86
16.936417	9.851
16.977512	9.797
16.919404	9.95
16.866325	9.862
17.1228	9.732
17.11655	9.844
17.026369	9.994
17.06837	9.972
17.046766	10.114
16.942328	10.082
16.872176	10.167
16.873185	10.163
16.910757	10.245
16.765394	10.211
16.848282	10.202
16.841881	10.066
16.974682	9.998
17.049262	9.983
16.93778	10.055
17.058401	9.924
16.968791	9.971
17.209603	9.995
17.278637	10.044
17.324768	9.902
17.148592	9.865
16.931057	9.857
16.953182	9.91
16.889207	9.855
16.882783	9.857
16.858135	10.006
16.802798	9.887
16.812881	9.966
16.821462	10.003
16.921779	10.008
16.822541	9.953
16.807366	9.86
16.853964	9.893
16.843808	9.847
16.811917	9.936
17.026648	9.915
17.074601	9.939
17.093941	9.93
16.995797	9.97
17.14684	9.853
17.03131	9.783
17.070959	9.9
17.144075	9.905
17.13089	9.803
16.974665	9.871
17.141056	9.903
17.193696	9.731
17.219343	9.611
17.108556	9.717
17.052955	9.816
17.130444	9.871
17.212767	9.794
17.10157	9.927
17.105697	10.031
17.050977	10.064
16.961571	9.944
16.958227	10.044
16.921098	10.018
16.90822	9.754
16.743306	9.828
16.520078	9.985
16.696649	9.852
16.734428	9.815
16.756908	9.828
16.731458	9.614
16.947712	9.606
16.951928	9.728
16.925653	9.655
16.949462	9.592
17.01472	9.724
16.940153	9.645
16.89466	9.699
16.903976	9.561
16.98621	9.676
17.214692	9.417
17.060848	9.456
17.07991	9.334
17.055203	9.347
17.096121	9.509
17.087637	9.632
16.935826	9.527
16.986851	9.479
16.870469	9.465
16.852693	9.455
16.977412	9.388
16.764467	9.522
16.872614	9.642
16.883063	9.546
17.042435	9.579
16.867307	9.568
16.786341	9.577
16.874781	9.686
16.900826	9.652
16.882029	9.485
17.010021	9.595
17.031992	9.658
16.916572	9.699
16.958151	9.741
17.013881	9.633
16.971578	9.684
17.006385	9.546
16.963527	9.558
16.869469	9.693
16.915127	9.664
16.89145	9.685
17.07431	9.565
17.119	9.66
16.985436	9.534
16.981951	9.722
16.853473	9.681
16.70914	9.606
16.74099	9.661
16.811668	9.767
16.839502	9.784
16.973362	9.883
16.885486	9.955
16.974256	9.966
16.934347	9.852
16.922393	9.868
16.876515	9.931
16.820052	9.86
16.863023	10.019
16.854638	9.976
16.871591	10.025
16.846748	9.961
16.681826	9.98
16.828108	10.106
16.75252	10.174
16.801925	10.125
16.735565	10.127
16.82151	10.124
16.696846	10.036
16.540847	10.055
16.728869	9.927
16.767024	9.896
16.668645	9.95
16.641762	9.919
16.897818	10.065
16.66333	9.947
16.768948	9.841
16.90527	9.901
16.794664	9.885
16.87636	9.843
16.83128	9.947
16.790793	9.941
16.843663	9.947
16.597588	10.02
16.618711	9.888
16.817168	9.963
16.801946	9.79
16.696886	9.838
16.781769	9.886
16.656753	9.91
16.633506	9.757
16.634217	9.829
16.623692	9.873
16.759499	9.921
16.729361	9.801
16.804216	9.707
16.730105	9.834
16.782614	9.92
16.651539	10.072
16.853881	10.114
17.041951	9.989
16.760365	10.137
16.914893	10.298
16.632199	10.287
17.034093	10.172
16.935495	10.05
16.879719	10.124
16.928923	10.156
16.992394	10.103
16.899912	10.07
16.842122	10.284
16.991041	10.184
16.853086	10.08
16.797983	10.187
16.668867	10.192
16.639944	10.124
16.772918	10.279
16.866911	10.254
16.79779	10.107
16.661097	10.095
16.44593	10.034
16.413166	10.072
16.545011	10.077
16.889247	9.945
16.917089	9.85
16.870916	9.902
16.885759	9.887
16.887651	9.873
16.811205	9.847
16.991565	9.853
16.949098	9.706
16.975316	9.604
17.021943	9.716
16.920253	9.517
16.832236	9.611
16.925169	9.429
17.001729	9.279
17.024884	9.347
17.084858	9.528
16.928858	9.566
16.956028	9.463
16.862026	9.475
16.846282	9.642
16.815859	9.616
16.824128	9.574
16.881833	9.42
16.880258	9.461
16.776119	9.545
16.942929	9.639
16.989768	9.687
16.912632	9.685
16.796323	9.711
16.742731	9.824
16.735681	9.891
16.759844	9.754
16.650721	9.789
16.687775	9.887
16.711496	9.79
16.785982	9.592
16.723101	9.646
16.701759	9.671
16.663078	9.798
16.708223	9.698
16.790317	9.805
16.801808	9.783
16.666672	9.713
16.70531	9.744
16.826823	9.609
16.614981	9.767
16.602201	9.757
16.475937	9.718
16.517371	9.684
16.485653	9.738
16.584953	9.595
16.684177	9.572
16.807339	9.729
16.860235	9.665
16.768684	9.655
16.807876	9.581
16.737728	9.543
16.739446	9.64
16.606263	9.626
16.548118	9.518
16.670928	9.387
16.714226	9.278
16.234694	9.446
16.192118	9.452
16.226434	9.282
16.283117	9.356
16.242112	9.254
16.269264	9.292
16.239228	9.317
16.208705	9.334
16.275825	9.481
16.274853	9.45
16.307562	9.428
16.318561	9.38
16.295445	9.275
16.194021	9.355
16.31083	9.402
16.36899	9.4
16.33747	9.29
16.340988	9.321
16.343013	9.319
16.324739	9.288
16.303321	9.274
16.425094	9.15
16.350781	9.136
16.386663	9.079
16.375054	9.219
16.090994	9.228
16.229993	9.193
16.042086	9.098
16.123907	9.256
16.257036	9.215
16.25961	9.094
16.2731	9.083
16.284444	8.964
16.299413	8.958
16.243387	8.905
16.192456	9.022
16.210682	9.153
16.180023	9.118
16.275312	9.171
16.296789	9.205
16.328581	9.048
16.29991	9.163
16.371681	9.07
16.316127	9.201
16.289684	9.224
16.210998	9.208
16.036678	9.218
16.184158	9.093
16.258864	9.334
16.232841	9.263
16.158739	9.172
16.175293	9.149
16.173972	9.251
16.090683	9.344
16.188607	9.224
16.238123	9.179
16.227379	9.206
16.092134	9.022
15.989155	9.089
16.020402	9.028
16.079821	9.016
16.010609	8.961
16.128753	8.993
16.062961	8.875
16.19426	9.008
16.213017	8.976
16.152335	9.071
16.155436	9.206
16.121295	9.083
16.186538	9.037
16.30947	9.009
16.278633	8.958
16.280628	8.917
16.404071	9.011
16.388911	8.928
16.333201	9.013
16.365775	8.937
16.465533	9.024
16.504546	8.759
16.497378	8.753
16.506259	8.78
16.352261	8.794
16.208981	8.79
16.262778	8.817
16.246049	8.767
16.163026	8.809
16.329356	8.923
16.311754	8.89
16.306966	8.771
16.265884	8.782
16.259087	8.79
16.131678	8.874
16.276922	8.773
16.339624	8.727
16.282296	8.766
16.196572	8.877
16.267364	8.878
16.140252	8.931
16.306815	8.99
16.296925	8.997
16.415689	8.988
16.389551	8.892
16.396379	8.863
16.386495	8.725
16.402642	8.826
16.421753	8.956
16.416003	8.987
16.342137	8.992
16.329299	8.891
16.232884	9.102
16.279048	9.14
16.270228	9.072
16.28615	9.028
16.346636	9.254
16.290679	9.16
16.318472	9.276
16.333457	9.291
16.393139	9.323
16.198596	9.332
16.185381	9.059
16.206709	9.142
16.292123	9.086
16.198576	9.092
16.263453	9.039
16.209774	9.076
16.067461	9.073
16.109211	9.14
16.081256	9.115
16.227085	9.184
16.158774	9.095
16.202102	9.017
16.245412	9.148
16.342245	9.219
16.353254	9.186
16.193081	9.114
16.317256	9.045
16.355615	8.944
16.319798	8.86
16.302551	8.792
16.257714	8.916
16.160247	8.984
16.121574	8.93
16.152382	8.921
16.083007	8.983
16.100688	8.979
16.025271	8.998
16.083526	9.091
16.10128	9.108
16.192414	9.183
16.177199	9.152
16.12864	9.096
16.244637	8.937
16.259119	8.896
16.277513	9.013
16.356215	9.115
16.495449	9.091
16.374566	9.125
16.333226	9.027
16.367139	9.088
16.348504	9.076
16.278855	8.831
16.205982	8.909
16.158561	8.914
16.156368	8.994
16.146884	9.019
16.126297	8.956
16.192164	9.152
16.244605	9.097
16.206532	9.08
16.224854	8.91
16.080061	8.954
16.247342	8.724
16.151109	8.886
16.146595	8.665
16.245848	8.634
16.232446	8.838
16.190997	8.69
16.19058	8.769
16.175494	8.722
16.343059	9.058
16.478786	9.065
16.471616	9.182
16.24318	9.073
16.088478	9.017
16.039016	8.952
16.202143	8.936
16.16505	8.902
16.002729	8.938
16.035101	8.878
16.290463	8.89
16.353117	8.864
16.299336	8.897
16.201719	9.019
16.171122	8.991
16.224761	8.922
16.291201	9.096
16.364592	9.157
16.249697	8.972
16.225719	9.209
16.152796	9.193
16.223756	9.22
16.087236	9.081
16.078488	8.83
16.085849	8.725
16.211668	8.798
16.351001	8.833
16.319071	8.781
16.323629	8.757
16.456357	8.892
16.367301	8.703
16.355042	8.872
16.198808	9.062
16.280084	8.943
16.201577	8.889
16.314419	8.799
16.29097	8.852
16.172762	8.78
16.162103	8.839
16.279231	8.745
16.285589	8.702
16.348676	8.701
16.342846	8.506
16.444337	8.717
16.392913	8.732
16.333244	8.77
16.317911	8.725
16.337801	8.735
16.37165	8.822
16.306913	8.823
16.377187	8.744
16.339785	8.868
16.323705	8.954
16.314909	8.869
16.34075	8.903
16.442434	8.955
16.312429	9.046
16.284919	9.11
16.308684	9.207
16.493363	9.023
16.449311	9.177
16.388077	9.013
16.32167	8.984
16.225049	8.952
16.132826	8.992
16.255108	9.03
16.291068	8.97
16.314683	8.924
16.464346	8.951
16.579518	9.084
16.569322	8.956
16.462156	8.923
16.499914	8.921
16.467403	8.935
16.445732	8.997
16.488849	9.017
16.47917	8.981
16.485664	8.949
16.600101	8.964
16.547476	8.972
16.470778	8.864
16.446574	8.811
16.460434	8.813
16.220945	8.853
16.146524	8.777
16.106718	8.725
16.110577	8.752
16.094648	8.923
16.008036	8.785
16.000938	9.024
16.078786	9.009
16.044773	8.994
16.056276	8.841
16.215055	8.841
16.20487	8.864
16.186938	8.873
16.262562	8.924
16.255883	8.818
16.388871	8.657
16.380523	8.742
16.406598	8.835
16.427986	8.886
16.310872	8.962
16.120799	8.953
16.220191	8.988
16.237435	9.124
16.358667	8.916
16.373865	8.873
16.502794	9.005
16.299047	9.018
16.256699	8.83
16.305106	8.871
16.329988	8.823
16.374556	8.852
16.397735	8.821
16.326227	8.804
16.392629	8.942
16.380345	9.054
16.310872	8.784
16.238685	8.771
16.358813	8.728
15.563094	8.81
15.360404	8.614
15.352215	8.715
15.388457	8.701
15.335599	8.677
15.299201	8.751
15.232007	8.51
15.212702	8.43
15.257859	8.564
15.447578	8.516
15.580763	8.536
15.460571	8.646
15.318193	8.369
15.309429	8.284
15.391253	8.401
15.397492	8.413
15.447616	8.29
15.320446	8.134
15.351129	8.129
15.397997	8.298
15.407373	8.302
15.409831	8.198
15.397493	8.296
15.370264	8.302
15.27761	8.283
15.265543	8.314
15.36452	8.209
15.509353	8.378
15.502244	8.373
15.60749	8.328
15.603844	8.22
15.534544	8.047
15.505226	8.032
15.372074	8.224
15.27136	8.327
15.315681	8.296
15.272801	8.256
15.332849	8.238
15.247409	8.07
15.245902	8.044
15.246977	8.191
15.235831	8.146
15.287699	8.032
15.298104	7.925
15.28592	8.07
15.25082	8.094
15.414688	8.018
15.331919	7.984
15.310662	8.009
15.280002	8.136
15.375084	8.143
15.290779	8.073
15.375181	8.001
15.448472	8.215
15.330302	8.16
15.251946	7.973
15.245511	8.034
15.317411	8.009
15.333109	8.094
15.339686	7.95
15.31184	8.082
15.261049	8.226
15.262211	8.198
15.226518	8.183
15.238774	8.124
15.268455	7.99
15.251278	8.013
15.368304	7.984
15.390668	8.027
15.405602	7.957
15.355776	8.076
15.437485	8.068
15.425979	8.107
15.511834	8.28
15.440208	8.295
15.41098	8.113
15.345578	8.166
15.33789	8.206
15.417313	8.1
15.408149	8.12
15.353479	8.225
15.39298	8.161
15.385396	8.25
15.410719	8.134
15.346726	8.307
15.330486	8.398
15.351254	8.152
15.360849	7.997
15.272987	8.227
15.223174	8.035
15.29241	8.238
15.310629	8.285
15.334163	8.227
15.368236	8.165
15.385342	8.048
15.347915	8.047
15.335984	7.973
15.287178	8.085
15.224427	8.095
15.20972	7.975
15.319723	8.029
15.382897	8.091
15.499001	8.265
15.465633	8.108
15.467778	8.072
15.35715	8.122
15.26436	8.082
15.42215	7.939
15.252366	8.028
15.215888	7.933
15.345006	7.827
15.267858	7.941
15.270586	8.081
15.265674	7.92
15.160957	8.047
15.260346	8.067
15.28652	8.012
15.364315	8.008
15.420504	7.968
15.336597	8.056
15.325081	8.056
15.338736	8.042
15.313489	7.923
15.283694	8.089
15.200405	7.935
15.236175	8.29
15.344581	8.338
15.309102	8.136
15.355469	8.088
15.203224	8.021
15.289517	8.112
15.331941	7.972
15.350223	8.085
15.399473	8.008
15.39874	7.952
15.358999	8.001
15.445442	7.802
15.469277	7.952
15.530035	7.841
15.513175	7.934
15.514567	7.969
15.46778	7.824
15.545203	7.775
15.506055	7.772
15.357394	7.872
15.39734	7.852
15.341661	7.802
15.434875	8.054
15.29322	7.832
15.276335	8.002
15.213977	7.813
15.326582	8.033
15.29955	8.177
15.287172	7.953
15.332681	8.077
15.246097	8.126
15.344772	8.22
15.190074	8.183
15.331292	8.141
15.231552	8.135
15.288935	8.145
15.146969	8.13
15.159161	8.095
15.201712	8.073
15.210002	7.986
15.273318	8.195
15.175842	8.168
15.033328	8.073
15.116076	8.143
15.174359	8.093
15.208365	8.015
15.199696	8.077
15.196699	8.238
15.290143	8.192
15.404915	8.253
15.429841	8.168
15.386779	8.235
15.437397	8.091
15.484024	8.323
15.490054	8.138
15.470174	8.119
15.528848	8.204
15.483261	8.037
15.454394	8.154
15.537815	8.132
15.502463	8.086
15.451416	8.025
15.443034	8.137
15.432758	8.27
15.359917	8.104
15.432855	8.156
15.370367	8.226
15.37689	8.119
15.337919	8.169
15.373648	7.927
15.323847	7.99
15.398284	8.171
15.379965	8.137
15.359024	8.158
15.331036	8.243
15.359112	8.449
15.513175	8.474
15.504544	8.336
15.41292	8.254
15.369383	8.256
15.386279	8.362
15.395022	8.237
15.360064	8.328
15.438343	8.312
15.426229	8.29
15.474118	8.202
15.438822	8.206
15.413717	8.127
15.36891	8.257
15.370948	8.247
15.349985	8.03
15.447928	8.158
15.449994	8.123
15.306499	8.374
15.408169	8.33
15.424896	8.333
15.44333	8.133
15.393532	8.256
15.301761	8.196
15.282427	8.261
15.290135	8.149
15.254093	8.195
15.300213	7.984
15.240413	8.003
15.177818	8.161
15.246286	8.099
15.378447	8.025
15.39701	7.924
15.357469	8.071
15.280828	8.149
15.26061	7.994
15.266719	8.151
15.29824	8.308
15.341583	8.082
15.288699	8.057
15.276874	8.094
15.403145	8.116
15.415075	8.06
15.43693	8.155
15.554351	8.219
15.41701	8.205
15.236879	8.166
15.212068	8.146
15.118493	8.11
15.16073	8.065
15.302582	8.018
15.260791	7.904
15.271256	8.091
15.342468	8.229
15.338092	8.279
15.298058	8.2
15.327846	8.167
15.439649	8.33
15.449451	8.204
15.433746	8.129
15.422272	7.976
15.411893	7.99
15.396307	7.971
15.496381	7.843
15.458107	7.799
15.556596	7.999
15.5389	7.992
15.427667	7.833
15.464355	7.958
15.461052	8.041
15.408201	7.899
15.372703	7.975
15.317403	7.893
15.260749	7.866
15.280378	7.931
15.331921	7.951
15.354197	7.793
15.342285	8.034
15.407175	7.941
15.342523	7.919
15.212762	8.019
15.257758	7.972
15.248022	8.149
15.34013	8.201
15.200049	8.049
15.098453	8.136
15.084859	8.248
15.036304	8.249
15.119832	8.124
15.220423	8.059
15.217616	8.08
15.168048	8.075
15.265478	7.935
15.090274	7.963
15.229557	7.932
15.338825	8.044
15.334158	7.952
15.410901	7.907
15.446666	8.13
15.515551	8.027
15.554176	8.267
14.46394	8.19
14.411301	8.15
14.387911	8.255
14.38905	8.098
14.322502	8.011
14.346599	8.086
14.336659	7.95
14.437409	7.802
14.410785	7.878
14.38871	7.821
14.476254	7.797
14.515834	7.672
14.548305	7.792
14.528585	7.779
14.496293	7.682
14.616818	7.684
14.622846	7.787
14.557602	7.799
14.539652	7.75
14.474484	7.677
14.530687	7.622
14.470394	7.531
14.561153	7.414
14.443959	7.387
14.384238	7.348
14.350555	7.297
14.454208	7.458
14.485493	7.58
14.448492	7.629
14.503913	7.508
14.44619	7.6
14.446196	7.781
14.437417	7.583
14.335158	7.419
14.279715	7.516
14.261408	7.51
14.258013	7.62
14.319366	7.52
14.33565	7.563
14.316677	7.701
14.323364	7.697
14.280271	7.562
14.389669	7.576
14.332565	7.594
14.416443	7.649
14.475428	7.778
14.530748	7.815
14.417957	7.575
14.455774	7.637
14.306388	7.452
14.265593	7.595
14.256418	7.547
14.216757	7.713
14.312435	7.683
14.411474	7.581
14.461391	7.643
14.377093	7.526
14.401164	7.38
14.331484	7.397
14.28172	7.327
14.268729	7.516
14.21876	7.562
14.292007	7.586
14.308254	7.474
14.44	7.395
14.413605	7.229
14.457903	7.438
14.434942	7.158
14.373261	7.26
14.415091	7.047
14.399855	7.117
14.252119	7.376
14.293685	7.38
14.275216	7.421
14.348047	7.435
14.426764	7.416
14.4394	7.382
14.398718	7.418
14.358139	7.358
14.384258	7.462
14.40043	7.397
14.339556	7.409
14.383576	7.449
14.42291	7.492
14.350908	7.44
14.375243	7.472
14.361536	7.398
14.397754	7.217
14.437826	7.291
14.434385	7.442
14.54787	7.397
14.492183	7.334
14.489781	7.196
14.416482	7.178
14.390724	7.2
14.531536	7.333
14.486193	7.231
14.467324	7.281
14.486329	7.1
14.438548	7.291
14.594159	7.46
14.59241	7.39
14.447626	7.348
14.55371	7.153
14.546556	7.228
14.450965	7.252
14.442872	7.293
14.311896	7.381
14.294229	7.149
14.220826	7.196
14.241794	7.153
14.29296	7.348
14.328037	7.256
14.293415	7.331
14.234362	7.337
14.242911	7.216
14.246298	7.242
14.262031	7.204
14.306169	7.27
14.296413	7.335
14.393044	7.212
14.452569	7.167
14.525864	7.071
14.394642	7.199
14.323643	7.046
14.336325	7.192
14.333943	7.296
14.332089	7.361
14.482541	7.345
14.545389	7.194
14.45898	7.157
14.332542	7.185
14.357215	7.109
14.293264	7.207
14.291369	7.06
14.263397	7.34
14.308152	7.403
14.380027	7.342
14.289878	7.181
14.198518	7.058
14.128947	7.113
14.160054	6.882
14.163759	7.085
14.194159	6.814
14.209445	6.799
14.207925	6.903
14.261823	7.032
14.36781	6.958
14.380743	6.73
14.44989	6.933
14.526632	6.858
14.363081	6.923
14.308515	7.032
14.311592	6.824
14.489363	6.902
14.510248	7.05
14.333461	7.089
14.400044	7.111
14.434504	6.908
14.318442	6.984
14.304277	6.919
14.285039	6.699
14.249491	6.851
14.307331	6.798
14.272503	7.051
14.287732	7.074
14.297841	7.079
14.346711	7.125
14.326546	7.077
14.247094	6.87
14.287204	6.971
14.311149	6.942
14.219909	7.171
14.304432	7.201
14.367188	6.9
14.227175	6.812
14.258779	7.076
14.328034	7.167
14.296486	7.022
14.198152	7.062
14.208755	6.917
14.214281	7.091
14.210956	6.973
14.368321	7.133
14.381992	7.145
14.407568	7.107
14.330106	7.027
14.454129	7.108
14.352131	7.096
14.205993	7.169
14.242269	7.097
14.31145	7.082
14.257787	6.973
14.327962	7.078
14.405812	7.099
14.403297	7.199
14.395908	7.024
14.407058	7.1
14.29523	6.987
14.326456	6.986
14.331653	7.031
14.339015	7.124
14.297431	7.139
14.27773	6.982
14.208775	7.052
14.274838	6.875
14.267641	6.961
14.172858	7.056
14.381031	7.146
14.44333	6.984
14.463812	7.039
14.524713	7.227
14.505506	7.21
14.373538	7.26
14.518127	7.173
14.556919	6.956
14.500204	6.909
14.446174	7.033
14.371511	6.971
14.342508	7.029
14.406534	7.123
14.377229	6.941
14.28799	7.041
14.323216	7.02
14.324771	7.082
14.269554	7.128
14.230115	7.191
14.261522	6.98
14.252502	6.952
14.319388	7.012
14.388963	7.082
14.464616	6.954
14.458853	6.802
14.503598	6.856
14.377947	6.952
14.547744	6.945
14.547961	6.963
14.577223	7.027
14.558912	7.083
14.4652	7.152
14.354586	7.056
14.287317	7.233
14.343684	7.233
14.260071	7.197
14.40907	7.352
14.299571	7.205
14.321373	7.191
14.271442	7.123
14.49828	7.098
14.532984	7.352
14.542854	7.35
14.491251	7.202
14.458801	7.207
14.498921	7.065
14.51644	6.833
14.474896	6.893
14.484123	7.122
14.415888	6.952
14.472467	7.066
14.572329	7.004
14.590583	6.99
14.4473	7.239
14.359281	7.09
14.365229	7.102
14.366454	6.863
14.438283	6.909
14.562079	7.07
14.509663	7.199
14.536969	7.209
14.513729	6.992
14.384558	7.171
14.41839	7.306
14.33796	7.192
14.274156	7.343
14.23071	7.316
14.345742	7.367
14.381951	7.387
14.317271	7.292
14.465669	7.308
14.330006	7.532
14.157244	7.353
14.158687	7.396
14.27319	7.112
14.298515	7.22
14.406716	7.186
14.486642	6.902
14.482382	6.964
14.51409	6.959
14.315426	7.084
14.377188	6.972
14.312053	7.055
14.263665	7.191
14.348578	7.269
14.350161	7.14
14.337343	7.194
14.277208	7.277
14.280886	7.328
14.376701	7.328
14.339957	7.253
14.437415	7.218
13.022537	7.217
12.896194	6.878
13.070175	6.887
13.110417	6.763
13.104212	6.725
13.102177	6.757
13.204951	6.677
13.10355	6.528
13.135495	6.73
13.19489	6.519
13.109599	6.416
13.18851	6.339
13.101621	6.279
13.055328	6.554
13.188444	6.439
13.182632	6.504
13.164751	6.301
13.07596	6.017
12.998281	6.114
12.997916	6.048
12.840146	6.15
13.122644	6.09
13.188458	6.173
13.218996	6.339
13.226589	6.253
13.261079	6.133
13.276129	6.011
13.129841	6.091
13.235745	6.255
13.183256	6.29
13.109576	6.229
13.217488	6.099
13.185202	6.254
13.257121	6.244
13.20255	6.006
13.2664	6.172
13.158857	5.981
13.250493	6.152
13.179688	6.292
13.166443	6.213
13.04431	6.083
13.024021	6.149
13.097792	6.421
13.18417	6.462
13.122284	6.326
13.197389	6.351
13.275285	6.403
13.156201	6.212
13.294901	6.062
13.195062	6.141
13.164787	6.152
13.031526	6.332
13.11813	6.36
13.084698	6.209
13.228349	6.4
13.184847	6.314
13.218318	6.364
13.270349	6.283
13.217274	6.188
13.176976	6.119
13.00292	6.206
13.048897	6.172
12.998803	6.36
12.971005	6.254
13.059783	6.49
13.006503	6.365
13.102359	6.368
13.153556	6.096
13.157032	6.172
13.216512	6.097
13.245716	6.174
13.275046	6.15
13.358879	6.149
13.251188	6.166
13.124585	5.872
13.145833	5.859
13.163922	6.018
13.168621	6.032
13.222196	6.095
13.137791	6.039
13.177881	5.983
13.172252	5.943
13.213068	6.131
13.250379	6.274
13.211181	6.245
13.244666	6.199
13.187654	5.877
13.237369	6.12
13.17555	5.989
13.239184	6.028
13.115424	5.778
13.15691	6.017
13.141228	6.078
13.315342	6.093
13.271762	6.001
13.223918	5.957
13.1015	5.936
13.154969	5.886
13.194704	6.01
13.093	5.844
13.240329	5.787
13.085518	5.913
13.233869	6.034
13.214867	6.022
13.285995	6.153
13.284996	5.854
13.284225	5.929
13.150362	6.024
13.169825	6.037
13.184862	5.824
13.14073	5.688
13.146856	5.715
13.186815	5.729
13.240403	5.69
13.230704	5.926
13.388253	6.097
13.380772	6.051
13.328008	6.007
13.27622	6.002
13.244641	5.825
13.309348	6.049
13.310862	6.105
13.210574	5.798
13.164213	5.82
13.176992	5.883
13.113538	5.881
13.176962	6.04
13.15762	5.727
13.199906	5.759
13.171195	5.627
13.189321	5.465
13.084356	5.469
13.224784	5.681
13.249452	5.802
13.302044	5.602
13.244756	5.637
13.182693	5.758
13.206221	5.455
13.131161	5.711
13.124685	5.621
13.184515	5.909
13.195375	5.826
13.217587	5.852
13.090278	5.734
12.988815	5.575
12.978221	5.619
13.19752	5.776
13.282619	5.921
13.145082	5.855
13.114831	5.766
13.126887	5.716
13.191593	5.827
13.016534	5.758
13.146964	5.771
13.268451	5.68
13.25761	5.463
13.270166	5.781
13.170112	5.72
13.196364	5.741
13.082202	5.741
13.172474	5.634
13.131714	5.847
13.108031	5.762
13.090733	5.766
13.094919	5.745
13.032237	5.706
13.170199	5.676
13.085264	5.711
13.115708	5.638
13.132775	5.651
13.180489	5.673
13.176801	5.964
13.120124	6.047
13.071122	5.709
13.094401	5.676
13.119485	5.57
13.195438	5.536
13.204194	5.652
13.144822	5.418
13.087808	5.643
13.061316	5.586
13.06379	5.547
13.081389	5.721
12.902489	5.766
12.939481	5.859
12.908218	5.868
13.08395	5.936
13.133834	5.862
13.06523	5.788
13.009865	5.713
13.063565	5.971
13.053014	5.892
13.115699	5.904
13.217703	5.961
13.14229	5.624
13.182338	5.721
13.06726	5.552
13.1649	5.744
13.036995	5.81
13.077594	5.754
12.942635	5.799
13.07632	5.823
13.089952	5.825
13.084367	5.857
13.217676	5.563
13.122789	5.618
13.158861	5.647
13.026254	5.737
13.129277	5.6
13.13211	5.679
13.07011	5.753
13.134355	5.783
13.209909	5.763
13.210973	5.784
13.171171	5.739
13.007274	5.744
13.062871	5.685
13.083811	5.98
13.174239	5.8
13.167078	5.941
13.109102	5.991
13.229409	6.027
13.19824	5.871
13.070701	6.006
13.225847	5.744
13.207679	5.754
13.198759	5.758
13.146407	5.914
13.258523	5.702
12.964695	5.833
13.053467	5.849
12.961097	5.569
12.959629	5.632
12.90504	5.697
13.089271	5.808
13.020193	5.781
13.229759	5.626
13.149541	5.517
13.124296	5.303
13.120504	5.498
13.066298	5.436
13.108007	5.546
13.218143	5.688
13.187318	5.668
13.072773	5.666
13.099156	5.595
13.137991	5.558
13.211781	5.476
13.181734	5.775
13.02027	5.648
13.166377	5.641
13.273868	5.538
13.169862	5.364
13.170098	5.142
13.097822	5.282
13.16158	5.431
13.165646	5.391
13.040154	5.342
12.989184	5.501
13.196375	5.534
13.118261	5.332
13.029772	5.398
13.154012	5.389
13.009972	5.389
13.188745	5.523
13.143646	5.583
13.150856	5.62
13.11688	5.549
13.233182	5.591
13.095741	5.689
13.214822	5.636
13.100749	5.553
13.255783	5.422
13.139966	5.442
13.16763	5.519
13.159596	5.437
13.137759	5.454
13.09401	5.542
13.155681	5.481
13.10727	5.432
13.048934	5.327
13.063092	5.349
13.049057	5.327
13.090081	5.306
13.124108	5.458
13.038504	5.431
13.148831	5.527
13.092312	5.301
13.115974	5.198
13.159429	5.172
13.125739	5.298
13.103073	5.302
12.969624	5.24
12.862574	5.166
13.045096	5.141
13.129695	4.68
13.067416	4.915
13.209422	4.878
13.168695	5.028
13.163916	4.942
12.216549	5.059
12.112413	5.057
12.192639	4.808
12.163912	5.02
12.112731	4.881
12.313745	4.841
12.361964	4.844
12.29959	4.869
12.263507	4.756
12.360182	4.808
12.281501	5.003
12.212939	4.889
12.148298	4.787
12.218893	4.838
12.099857	4.894
12.206336	4.87
12.239491	4.978
12.140678	5.101
12.232117	4.922
12.187221	5.053
12.19577	4.773
12.266429	4.858
12.227312	4.813
12.199668	4.754
12.268726	4.778
12.197692	4.797
12.279321	4.87
12.238937	4.592
12.249013	4.572
12.270242	4.608
12.257	4.865
12.227203	4.741
12.167801	4.651
12.146581	5.225
12.186219	4.907
12.181413	5.082
12.163284	4.936
12.170436	4.746
12.251056	4.878
12.30295	4.785
12.333435	4.781
12.274589	4.978
12.230794	4.907
12.228573	4.84
12.348948	4.917
12.337518	4.863
12.261777	4.725
12.303617	4.504
12.272433	4.625
12.32933	4.571
12.359127	4.641
12.297697	4.367
12.257353	4.601
12.199473	4.749
12.06816	4.65
12.062734	4.35
12.005368	4.537
12.187702	4.655
12.290691	4.813
12.118668	4.711
12.157628	4.896
12.166868	4.641
12.179798	4.763
12.195232	4.575
12.265263	4.688
11.973162	4.574
12.224358	4.5
12.176527	4.751
12.108611	5.283
12.138258	4.991
12.108927	4.835
12.083602	4.678
12.2059	4.772
12.28019	4.792
12.404467	4.883
12.163005	4.819
12.300554	4.865
12.305885	4.851
12.225643	5.111
12.281578	4.948
12.217986	5.247
12.317553	4.974
12.351815	5.02
12.445296	4.924
12.290983	4.89
12.149315	5.169
12.153734	5.206
12.126141	5.047
12.115535	4.867
11.997655	4.676
11.956121	4.845
12.022065	4.763
12.16134	4.694
12.152246	5.038
12.276262	4.93
12.306411	5.012
12.327834	5.088
12.11523	5.292
12.185287	4.969
12.128631	5.123
12.139369	4.998
12.198669	4.946
12.202302	4.863
12.080478	4.991
12.214833	5.169
12.218617	5.234
12.187415	5.231
12.155725	5.324
12.130103	5.453
12.10223	5.364
12.037637	5.539
12.132793	5.131
12.109149	5.259
12.300898	5.13
12.255914	5.1
12.156663	5.102
12.074352	5.037
12.234528	4.986
12.12711	5.19
12.178279	5.011
12.18271	5.061
12.095485	5.019
12.051394	4.87
12.061295	5.121
11.987902	5.097
12.009821	5.186
12.146484	5.32
12.174651	5.33
12.152578	5.22
12.208308	5.287
12.13442	5.094
12.106895	5.031
12.124216	5.123
12.145815	5.046
12.239404	5.144
12.150304	5.311
12.210204	5.28
12.229375	5.215
12.171521	5.374
12.221585	5.336
12.068632	5.285
12.178189	5.32
12.202311	5.171
12.191191	5.066
12.152628	5.016
12.085019	5.004
12.151719	4.911
12.191653	5.037
12.264434	4.857
12.296345	4.891
12.160534	4.895
12.229785	5.006
12.260931	4.922
12.312846	4.929
12.300259	4.986
12.118299	5.034
12.183986	4.941
12.199594	4.814
12.197581	4.965
12.370275	5.051
12.224577	5.107
12.330028	4.992
12.293371	4.98
12.308514	4.911
12.248006	4.85
12.25856	4.905
12.343761	4.982
12.273162	5.051
12.276317	5.019
12.248885	5.087
12.082951	5.17
12.273865	5.008
12.309796	4.965
12.395208	4.767
12.243024	5.004
12.32953	4.84
12.104069	4.709
12.028956	4.85
12.117403	4.583
12.205167	4.845
12.082384	5.059
12.231103	4.862
12.345781	4.927
12.384603	5.048
12.341428	4.966
12.246622	4.908
12.253078	4.92
12.339413	4.749
12.2982	4.743
12.255296	4.898
12.122018	5.138
12.213687	4.932
12.162008	4.951
12.041905	5.109
12.07558	5.087
12.113807	5.217
12.277086	5.028
12.221092	4.965
12.265821	4.744
12.204139	4.626
12.310898	4.588
12.264819	4.702
12.247822	4.792
12.269769	4.509
12.188245	4.596
12.237572	4.725
12.234209	4.761
12.265629	4.795
12.297203	4.891
12.374922	4.967
12.357953	4.959
12.199431	4.778
12.100625	5.116
11.994894	5.202
12.102331	5.003
12.164469	4.701
12.198143	4.448
12.235842	4.688
12.253339	4.741
12.266422	4.726
12.296222	4.571
12.334637	4.566
12.242783	4.616
12.123335	4.882
12.230636	4.997
12.364492	4.614
12.311791	4.776
12.377835	4.695
12.247704	4.606
12.214824	4.63
12.285693	4.821
12.200043	4.852
12.259259	4.985
12.248284	4.986
12.203146	4.949
12.287387	4.918
12.186024	4.887
12.203452	4.956
12.28729	4.961
12.290779	4.916
12.297406	5.092
12.222826	5.121
12.286124	5.016
12.335969	5.083
12.319751	5.027
12.245361	4.852
12.272231	4.847
12.332496	4.801
12.371857	5.011
12.365184	5.086
12.38483	5.049
12.297016	5.123
12.375001	5.029
12.320566	5.077
12.271565	5.047
12.247326	4.992
12.247007	5.137
12.323509	5.236
12.311535	5.058
12.302245	5.092
12.243909	5.363
12.163899	4.918
12.229777	5.148
12.314512	4.993
12.324728	5.08
12.275025	4.912
12.335603	5.121
12.33628	5.183
12.355847	5.012
12.328732	5.011
12.193561	4.87
12.299569	4.808
12.211108	4.526
12.257585	4.637
12.216929	4.733
12.300435	4.688
12.312802	4.507
12.32657	4.641
12.215459	4.57
12.160849	4.811
12.239556	4.709
12.190607	5.01
12.164582	4.727
12.27748	4.864
12.226461	4.868
12.231698	4.798
12.24704	4.852
12.274822	4.934
12.36791	4.949
12.307918	4.905
12.331833	4.952
12.237362	5.026
12.132316	5.044
12.185807	4.981
12.207793	5.23
12.307273	5.074
12.336879	5.185
12.290891	5.341
12.195481	5.147
12.267479	5.071
11.330466	4.796
11.32767	4.753
11.361816	4.698
11.377818	4.577
11.407171	4.796
11.394427	4.558
11.450542	4.865
11.35953	4.75
11.462662	4.632
11.441612	4.564
11.334818	4.552
11.394909	4.324
11.287395	4.431
11.293473	4.418
11.349083	4.325
11.40535	4.256
11.406178	4.437
11.433041	4.481
11.478549	4.602
11.461007	4.812
11.348223	4.894
11.384845	4.912
11.266851	4.807
11.246872	4.768
11.215383	4.736
11.178205	4.803
11.307889	5.201
11.276185	5.117
11.254773	4.74
11.326557	4.836
11.376735	4.66
11.378402	4.694
11.351115	4.771
11.376307	4.735
11.36552	4.535
11.380183	4.736
11.335354	4.84
11.367751	4.88
11.264232	4.773
11.408261	4.98
11.341632	4.738
11.34173	4.808
11.473891	4.634
11.348716	4.53
11.354226	4.518
11.363061	4.711
11.34013	4.752
11.26344	4.775
11.329908	4.508
11.399452	4.577
11.367634	4.682
11.335072	4.576
11.346711	4.751
11.386385	4.729
11.382001	4.8
11.383061	4.637
11.326797	4.476
11.332789	4.723
11.381738	4.671
11.367687	4.488
11.336793	4.686
11.312145	4.634
11.386877	4.599
11.466481	4.388
11.438545	4.312
11.446392	4.778
11.462835	4.516
11.353546	4.37
11.38459	4.234
11.464354	4.015
11.500088	3.981
11.478508	4.117
11.537302	4.072
11.53745	4.182
11.561532	4.233
11.490677	4.267
11.527458	4.322
11.560179	4.325
11.431248	4.226
11.57904	4.386
11.382722	4.327
11.433432	4.246
11.317151	4.379
11.268374	4.415
11.241865	4.247
11.132843	4.149
11.381185	4.26
11.323867	4.127
11.360056	3.77
11.185725	3.926
11.203788	3.868
11.247956	4.142
11.40322	4.368
11.337331	4.365
11.363555	4.248
11.43211	4.163
11.430766	4.385
11.338354	4.533
11.334062	4.213
11.321435	4.065
11.387981	4.111
11.391558	4.175
11.425871	4.231
11.565321	4.403
11.42431	4.416
11.388554	4.407
11.433109	4.33
11.310802	4.265
11.365369	4.694
11.337513	4.465
11.357145	4.672
11.358193	4.605
11.342112	4.473
11.318849	4.597
11.305013	4.592
11.166251	4.604
11.280704	4.569
11.329369	4.917
11.345224	4.981
11.267837	4.866
11.383034	4.638
11.358339	4.657
11.37877	4.746
11.410411	4.662
11.456874	4.668
11.38422	4.609
11.364465	4.774
11.126793	4.762
11.315104	4.666
11.298937	4.625
11.425333	4.496
11.352697	4.711
11.448035	5.022
11.365841	4.579
11.382874	4.345
11.393726	4.654
11.348613	4.455
11.275031	4.458
11.353238	4.46
11.260123	4.374
11.318218	4.662
11.348302	4.605
11.375225	4.555
11.365137	4.718
11.306546	4.92
11.3479	4.724
11.318082	4.682
11.418724	4.744
11.448563	4.89
11.490706	4.728
11.549229	4.707
11.456818	4.767
11.393522	4.758
11.379103	4.758
11.351913	4.798
11.311994	4.95
11.37641	4.786
11.406631	4.587
11.330729	4.618
11.302488	4.556
11.332888	4.672
11.332742	4.636
11.244367	4.587
11.390307	4.67
11.37805	4.669
11.346294	4.644
11.408984	4.591
11.386175	4.419
11.347413	4.421
11.24832	4.418
11.364276	4.345
11.430985	4.27
11.408055	4.18
11.458535	4.208
11.465038	3.992
11.364441	4.004
11.368968	4.136
11.420132	4.01
11.491351	4.008
11.416558	4.155
11.456287	4.33
11.381064	4.188
11.379393	4.351
11.404605	4.465
11.402662	4.358
11.454174	4.397
11.492519	4.408
11.421687	4.341
11.382843	4.353
11.301229	4.284
11.321583	4.448
11.357108	4.501
11.403593	4.639
11.482814	4.387
11.380505	4.436
11.412664	4.331
11.488657	4.342
11.502039	4.278
11.374596	4.357
11.358936	4.069
11.444945	4.144
11.422013	4.113
11.504143	4.197
11.385181	4.192
11.644003	4.266
11.459651	4.208
11.543944	4.268
11.358401	4.343
11.499425	4.164
11.544709	4.175
11.580928	4.16
11.425013	4.396
11.41214	4.287
11.294189	4.337
11.44273	4.558
11.470696	4.424
11.494692	4.33
11.450159	4.28
11.44404	4.349
11.361881	4.568
11.305298	4.524
11.314803	4.374
11.362728	4.553
11.377948	4.596
11.271655	4.54
11.307859	4.468
11.473591	4.598
11.487171	4.572
11.482908	4.673
11.402555	4.37
11.45234	4.464
11.434001	4.453
11.323749	4.564
11.398672	4.666
11.390204	4.511
11.399382	4.481
11.35851	4.414
11.304117	4.53
11.322791	4.502
11.341397	4.552
11.319504	4.527
11.395494	4.66
11.402385	4.828
11.465322	4.699
11.406372	4.517
11.411906	4.781
11.368664	4.772
11.386309	4.595
11.299199	4.515
11.366783	4.398
11.421695	4.491
11.385919	4.552
11.458888	4.547
11.476245	4.434
11.459839	4.491
11.440643	4.369
11.37954	4.226
11.407601	4.242
11.247243	4.107
11.285276	4.17
11.363815	4.075
11.31227	4.216
11.301222	4.131
11.30976	3.902
11.336217	4.229
11.412444	4.368
11.42888	4.315
11.371561	4.444
11.491797	4.455
11.457675	4.603
11.46613	4.605
11.352755	4.423
11.362527	4.257
11.491504	4.323
11.600581	4.417
11.57091	4.4
11.565417	4.314
11.571858	4.436
11.506882	4.606
11.490531	4.341
11.542441	4.574
11.531946	4.541
11.50929	4.833
11.436698	4.899
11.413941	4.927
11.361571	4.738
11.355248	5.025
11.353733	4.698
11.391002	4.557
11.32409	4.508
11.24664	4.655
11.403824	4.766
11.312353	4.864
11.306879	4.813
11.311281	4.645
11.273297	4.697
11.330474	4.762
11.317829	4.81
11.262852	4.622
11.337667	4.624
10.815521	4.779
10.786437	4.839
10.852978	4.746
10.839717	4.725
10.899225	4.658
10.783341	4.802
10.841764	4.419
10.757588	4.635
10.757825	4.891
10.850212	4.711
10.909495	4.825
10.874095	4.786
10.833422	4.622
10.871042	4.633
10.912288	4.409
10.848154	4.556
10.791106	4.421
10.853275	4.599
10.873802	4.676
10.827606	4.83
10.856329	4.748
10.832176	4.695
10.834716	4.648
10.916759	4.677
10.838689	4.839
10.853054	4.797
10.796133	4.774
10.87171	4.889
10.867446	4.644
10.799415	4.812
10.980174	4.658
10.890478	4.622
10.889487	4.693
10.862127	4.602
10.807089	4.637
10.833809	4.518
10.790889	4.623
10.870643	4.732
10.774527	4.827
10.846667	4.581
10.791286	4.841
10.855466	4.718
10.875548	4.737
10.860866	4.844
10.805587	4.647
10.851229	4.824
10.89029	4.909
10.890166	4.85
10.830489	4.821
10.805292	4.777
10.872749	4.794
10.905017	4.693
10.918177	4.824
10.862668	4.636
10.85114	4.798
10.877295	4.821
10.861344	4.967
10.831171	4.975
10.838356	4.96
10.909719	4.998
10.83837	4.968
10.864718	4.915
10.704847	4.955
10.863211	5.137
10.858504	5.264
10.907444	4.956
10.779629	4.838
10.828937	4.837
10.88403	4.664
10.837526	4.732
10.857223	4.605
10.783563	4.752
10.769233	4.958
10.801878	4.924
10.799129	4.774
10.873051	4.983
10.831319	4.82
10.876052	4.677
10.948582	4.614
10.946786	4.728
10.928022	5.116
10.93579	5.368
10.980315	5.251
10.89256	4.962
10.837643	5.062
10.913568	4.878
10.840824	4.745
10.820994	4.908
10.87895	4.789
10.904462	5.142
10.802522	4.972
10.891083	5.039
10.816387	5.361
10.73245	5.076
10.830923	5.052
10.8481	4.902
10.76254	4.932
10.896407	4.758
10.816656	4.789
10.77692	5.228
10.820382	5.089
10.765011	5.009
10.795828	5.172
10.780535	5.171
10.721818	4.981
10.773434	4.658
10.771095	4.865
10.751486	4.717
10.773379	4.849
10.82462	4.925
10.811939	4.87
10.795956	4.864
10.810878	5.03
10.788584	4.865
10.849462	4.941
10.85272	5.275
10.834091	4.992
10.831236	5.198
10.85915	4.836
10.801144	4.696
10.829173	4.858
10.894105	4.737
10.905781	4.743
10.860122	4.617
10.752928	4.693
10.840998	4.586
10.895696	4.601
10.898818	4.648
10.891872	4.672
10.877349	4.532
10.760754	4.494
10.81001	4.423
10.783395	4.434
10.870947	4.44
10.839598	4.65
10.812831	4.708
10.826672	4.929
10.903864	4.773
10.91159	4.679
10.756368	4.651
10.832109	4.61
10.898913	4.791
10.859585	4.673
10.873876	4.727
10.858797	4.6
10.897045	4.626
10.874296	4.698
10.869694	4.591
10.917759	4.675
10.783985	4.925
10.91277	4.943
10.927249	4.922
10.810398	4.902
10.815866	4.767
10.811554	4.949
10.772031	4.818
10.806628	4.773
10.773749	4.867
10.836773	4.878
10.818054	5.107
10.851332	4.977
10.902768	4.751
10.893771	4.894
10.938537	5.104
10.984396	4.956
10.983046	4.913
10.890614	4.757
10.825232	4.962
10.835425	5.039
10.833957	4.671
10.861473	4.554
10.838314	4.659
10.855899	4.723
10.919681	4.707
10.861997	4.642
10.889799	4.391
10.811645	4.404
10.844022	4.457
10.756234	4.54
10.853716	4.552
10.858412	4.57
10.858275	4.379
10.897853	4.471
10.862046	4.587
10.837261	4.582
11.044711	4.414
10.995489	4.469
10.922972	4.541
10.907936	4.803
10.860099	4.887
10.90754	4.937
10.821056	5.107
10.789559	4.903
10.902317	4.755
10.811974	4.761
10.840348	4.784
10.80613	4.901
10.828554	4.717
10.788945	5.048
10.845489	4.959
10.888697	4.907
10.784396	5.249
10.770791	4.866
10.751768	5.108
10.78986	5.378
10.846265	5.054
10.862578	5.167
10.883528	5.011
10.902559	5.251
10.849872	4.766
10.941969	4.937
10.909113	4.818
10.964074	4.607
11.004158	4.854
10.924947	4.949
10.798168	5.108
10.960675	5.096
10.859543	4.79
10.79802	4.84
10.901918	5.233
10.794292	4.662
10.843026	4.718
10.829918	4.778
10.882482	5.105
10.884656	4.887
10.900616	5.111
10.969513	5.161
11.002709	5.452
10.877132	4.712
10.777264	4.924
10.926498	4.913
10.858369	4.945
10.838719	4.862
10.851368	4.803
10.843928	4.872
10.893234	4.929
10.800074	4.857
10.858162	4.785
10.908375	5.156
10.893065	4.78
10.923694	4.869
10.977477	5.044
10.903897	4.745
10.981397	5.227
10.890841	4.719
10.866793	4.656
10.842115	4.907
10.89966	5.173
10.884281	4.865
10.935132	5.038
10.884329	5.035
10.95532	4.828
10.89388	4.835
10.945938	4.737
10.926322	4.74
10.924858	4.842
10.937595	4.683
10.855065	4.643
10.836417	4.843
10.872414	5.106
10.94108	5.038
10.837044	4.95
10.947698	5.009
10.984558	5.057
10.96593	4.928
10.942767	4.723
10.87719	4.663
10.941636	4.79
10.880859	4.771
10.867193	4.521
10.815915	4.586
10.849525	4.699
10.874209	4.69
10.947239	4.695
10.961069	4.792
10.93265	4.798
10.828252	4.826
10.91353	4.873
10.968447	4.794
10.828659	4.672
10.927249	4.844
10.87361	4.655
10.797693	4.654
10.813132	4.334
10.784792	4.463
10.715279	4.438
10.821279	4.391
10.890169	4.327
10.781694	4.234
10.85183	4.287
10.782866	4.374
10.782366	4.357
10.859195	4.428
10.913732	4.412
10.92199	4.34
10.810404	4.489
10.774918	4.678
10.914405	4.454
10.81643	4.695
10.882719	4.293
10.34069	4.989
10.34069	4.319
10.392847	4.351
10.345026	4.002
10.401282	4.054
10.394542	4.029
10.409012	4.072
10.404871	4.451
10.446203	4.513
10.366153	4.542
10.383918	3.963
10.415075	4.057
10.313724	3.985
10.315568	4.169
10.305895	4.266
10.451742	4.216
10.465108	4.345
10.379078	4.234
10.427219	4.236
10.378242	4.411
10.384858	4.326
10.410927	4.448
10.471193	4.74
10.427276	4.857
10.433315	4.276
10.332394	4.405
10.393133	4.187
10.383862	4.18
10.355717	4.246
10.300901	4.166
10.399904	4.209
10.451871	4.052
10.470007	4.043
10.415712	4.183
10.37487	4.201
10.533321	4.279
10.468037	4.267
10.461996	4.173
10.474588	4.407
10.559112	4.218
10.590423	4.16
10.523105	4.654
10.501843	4.69
10.460823	4.387
10.604005	4.238
10.457102	4.335
10.524155	4.461
10.534127	4.46
10.527455	4.426
10.521822	4.454
10.593238	4.456
10.442707	4.462
10.510694	4.256
10.433881	4.241
10.495164	4.256
10.406664	4.244
10.540346	4.368
10.542168	4.221
10.458676	4.4
10.426265	4.431
10.522217	4.37
10.489652	4.517
10.371506	4.25
10.390553	4.207
10.494463	4.504
10.455097	4.539
10.391291	4.619
10.350965	4.481
10.293929	4.376
10.275089	4.266
10.380627	4.321
10.543722	4.233
10.545409	4.276
10.532991	4.462
10.453759	4.331
10.484182	4.471
10.511696	4.299
10.47995	4.535
10.483096	4.405
10.608523	4.361
10.638664	4.263
10.587139	4.359
10.587826	4.526
10.570727	4.29
10.580754	4.323
10.635422	4.212
10.588336	4.517
10.588119	4.563
10.68506	4.494
10.584953	4.581
10.538679	4.53
10.533305	4.659
10.643821	4.701
10.671649	4.528
10.666374	4.419
10.585189	4.505
10.578785	4.606
10.547973	4.645
10.612991	4.472
10.555217	4.534
10.595616	4.47
10.613071	4.358
10.621353	4.237
10.656056	4.373
10.732092	4.302
10.576833	4.157
10.515517	4.409
10.619229	4.285
10.587497	4.364
10.523344	4.273
10.456687	4.487
10.573926	4.546
10.623426	4.401
10.547359	4.127
10.590156	4.174
10.652674	4.126
10.592446	4.202
10.509305	4.105
10.542905	3.998
10.600542	3.948
10.614724	4.012
10.587638	3.885
10.609237	3.94
10.588177	4.111
10.512957	4.015
10.534593	4.091
10.548981	4.099
10.490382	4.394
10.495414	4.235
10.509676	4.234
10.511771	4.134
10.554306	4.352
10.534561	4.512
10.548084	4.276
10.406239	4.353
10.466654	4.327
10.468967	4.243
10.590696	4.404
10.620288	4.379
10.607999	4.285
10.630156	4.436
10.632466	4.514
10.59266	4.371
10.569856	4.475
10.718558	4.594
10.647209	4.608
10.612795	4.553
10.678093	4.441
10.65071	4.472
10.659459	4.429
10.697488	4.514
10.632758	4.565
10.592019	4.353
10.615236	4.151
10.669765	4.254
10.648477	4.27
10.674931	4.13
10.571348	4.036
10.641921	4.092
10.668991	4.265
10.659413	4.455
10.612135	4.248
10.557876	4.232
10.558391	4.305
10.636443	4.326
10.600803	4.472
10.586156	4.467
10.637122	4.461
10.591605	4.234
10.638653	4.209
10.668133	4.185
10.684781	4.288
10.651702	4.154
10.667093	4.117
10.723898	3.828
10.775546	3.996
10.689312	3.969
10.672941	3.992
10.591267	4.095
10.536006	4.155
10.647563	4.144
10.653535	4.202
10.655706	4.067
10.667605	4.196
10.597464	4.189
10.606495	4.28
10.571197	4.181
10.630228	4.235
10.642454	4.382
10.698238	4.504
10.704199	4.49
10.745121	4.391
10.672719	4.549
10.703016	4.396
10.642182	4.651
10.65164	4.607
10.543668	4.532
10.664653	4.586
10.699363	4.501
10.661826	4.411
10.633624	4.381
10.633066	4.479
10.598234	4.268
10.612981	4.301
10.716716	4.332
10.711618	4.185
10.654277	4.331
10.691577	4.634
10.739609	4.594
10.736515	4.212
10.632473	4.269
10.655055	4.29
10.719952	3.951
10.638257	4.435
10.647316	4.045
10.588131	4.126
10.633569	4.44
10.588876	4.363
10.562937	4.473
10.609263	4.325
10.570071	4.201
10.62769	4.005
10.631208	4.165
10.673396	4.275
10.607997	4.479
10.601076	4.411
10.597463	4.307
10.610419	4.368
10.630253	4.244
10.629934	4.163
10.690844	4.232
10.665907	4.009
10.688916	3.882
10.596773	4.053
10.653922	4.091
10.733846	3.864
10.666291	3.688
10.689341	3.441
10.585993	3.536
10.671288	3.435
10.654751	3.097
10.698917	3.191
10.654035	3.163
10.631634	3.258
10.601712	3.009
10.541622	3.18
10.579414	2.922
10.668698	3.195
10.580576	2.963
10.545034	3.193
10.60379	3.228
10.551721	3.111
10.656148	3.352
10.708296	3.256
10.670149	3.219
10.674014	3.296
10.670467	3.26
10.660979	3.454
10.765055	3.361
10.708716	3.06
10.698307	3.478
10.676796	3.079
10.700948	2.979
10.661817	3.284
10.708595	2.905
10.732512	3.071
10.683315	2.928
10.687366	2.982
10.690681	2.891
10.740844	2.96
10.748943	3.029
10.718578	2.976
10.728997	3.227
10.746954	2.95
10.769295	3.044
10.819069	3.053
10.793727	3.006
10.767292	3.138
10.744683	2.866
10.731024	2.772
10.656768	2.989
10.652954	2.742
10.615891	2.625
10.700399	2.681
10.600275	2.391
10.70468	2.397
10.762083	2.267
10.744445	2.115
10.678741	2.392
10.643041	2.299
10.541903	2.199
10.533183	2.224
10.652141	2.427
10.629561	2.384
10.651999	2.611
10.672837	3.004
10.711038	2.238
10.722575	1.767
10.744149	2.15
10.699825	1.922
10.735077	2.086
9.625242	2.224
9.622412	2.316
9.704811	2.342
9.628693	2.428
9.643384	2.739
9.60815	2.045
9.648414	2.081
9.640201	2.289
9.667151	2.073
9.648772	2.167
9.646164	2.121
9.623279	2.238
9.657064	2.138
9.62352	1.834
9.620522	2.053
9.637644	1.924
9.653417	2.117
9.49954	1.816
9.50508	1.646
9.610877	1.496
9.566751	1.628
9.589503	1.598
9.584773	1.582
9.549962	1.85
9.476886	1.826
9.509971	1.612
9.553231	1.627
9.51649	1.557
9.623916	1.272
9.632325	1.411
9.573247	1.484
9.591568	1.795
9.573167	1.524
9.510832	1.846
9.580871	1.615
9.481123	1.375
9.610566	2.331
9.659654	2.018
9.463069	1.988
9.631744	1.825
9.640663	1.451
9.626211	1.423
9.693296	1.578
9.690789	1.469
9.653425	1.593
9.597303	1.944
9.669501	2.129
9.557287	1.696
9.592179	1.751
9.595641	1.67
9.616134	1.448
9.57184	1.841
9.590539	1.664
9.612088	1.742
9.636024	1.655
9.579216	1.791
9.66793	1.574
9.651103	1.791
9.655325	1.92
9.650754	2.12
9.642459	1.825
9.651996	1.868
9.690008	1.946
9.659822	1.698
9.682021	1.466
9.746265	1.706
9.583522	1.862
9.518769	1.707
9.647398	3.449
9.698859	2.866
9.739867	1.88
9.728525	2.089
9.659479	1.903
9.752707	2.022
9.649973	1.993
9.708176	1.886
9.683419	1.492
9.690309	1.621
9.610237	1.688
9.66353	1.852
9.668826	1.754
9.661995	1.463
9.649946	1.293
9.69773	1.667
9.64449	1.498
9.651437	1.731
9.705054	1.804
9.675136	1.687
9.732789	1.806
9.780873	1.798
9.661526	1.673
9.783111	1.512
9.680132	1.685
9.748251	1.589
9.616467	1.403
9.663764	1.332
9.608123	1.552
9.61963	1.521
9.621191	1.678
9.597769	2.492
9.638258	2.972
9.703311	1.805
9.647177	1.464
9.676931	1.502
9.610857	1.478
9.700105	1.325
9.661839	1.774
9.671488	1.907
9.691107	1.523
9.766002	1.5
9.665747	1.664
9.703656	1.691
9.775168	1.633
9.669922	1.431
9.72649	1.397
9.709056	1.548
9.755197	1.317
9.752811	1.319
9.797723	1.221
9.712309	1.556
9.729883	1.772
9.672672	1.55
9.705867	1.639
9.782941	3.351
9.74795	1.505
9.72666	1.847
9.765519	1.522
9.720137	1.785
9.751783	1.829
9.654214	1.769
9.713982	1.642
9.72662	1.606
9.702262	1.631
9.701468	1.419
9.601999	1.408
9.646625	1.331
9.640091	1.566
9.68957	1.68
9.680696	1.493
9.703421	1.633
9.737497	1.643
9.746532	1.607
9.83814	1.608
9.742173	1.547
9.68589	1.46
9.71581	1.897
9.786764	1.618
9.814344	1.737
9.733344	1.538
9.811425	1.519
9.843785	1.558
9.848751	1.516
9.843211	1.776
9.770203	1.634
9.755067	1.366
9.737661	1.721
9.789812	1.601
9.799681	1.449
9.646671	1.535
9.633459	1.594
9.773213	1.588
9.774104	1.995
9.694186	1.935
9.742321	1.838
9.715544	2.012
9.742141	1.762
9.709711	1.502
9.73233	1.788
9.807016	1.427
9.889118	1.46
9.7593	1.543
9.694398	1.545
9.708777	1.572
9.743089	1.96
9.736592	1.479
9.756145	1.728
9.827299	1.598
9.808935	1.627
9.830108	1.47
9.761987	1.521
9.744192	1.694
9.762013	1.596
9.723314	1.593
9.66736	1.43
9.652835	1.491
9.686763	1.366
9.788977	1.381
9.765513	1.57
9.79113	1.476
9.788066	1.331
9.657522	1.661
9.731456	1.265
9.695641	1.339
9.731253	1.091
9.739053	1.196
9.71628	1.54
9.699278	1.579
9.734895	1.567
9.691185	1.374
9.734792	1.293
9.799223	1.379
9.814109	1.356
9.748752	1.487
9.792271	1.435
9.801911	1.732
9.725004	1.826
9.77229	1.632
9.769365	1.913
9.845128	1.665
9.756464	1.508
9.786717	1.426
9.884035	1.675
9.865968	1.36
9.743485	1.501
9.803004	1.419
9.767708	1.386
9.725065	1.448
9.83897	1.615
9.821298	1.685
9.802834	1.52
9.786917	1.694
9.798007	1.713
9.775368	1.94
9.77308	1.79
9.808048	1.861
9.737586	1.799
9.769567	1.86
9.749152	1.981
9.772545	1.724
9.801864	1.788
9.805833	1.663
9.920819	1.883
9.808009	1.895
9.814008	1.552
9.847437	1.61
9.805265	1.303
9.811501	1.564
9.831329	1.578
9.81646	1.641
9.788138	1.601
9.862302	1.388
9.896388	1.525
9.913156	1.59
9.8615	1.522
9.899397	1.442
9.834607	1.467
9.860011	1.835
9.853874	1.616
9.869341	1.35
9.859517	1.247
9.810156	1.478
9.872858	2.637
9.858618	2.607
9.923876	1.558
9.935199	1.802
9.919005	1.605
9.857	1.664
9.732385	1.592
9.853146	1.533
9.87825	1.729
9.894685	1.501
9.829533	1.544
9.861537	1.739
9.833183	1.859
9.830699	1.667
9.816042	1.589
9.800905	1.634
9.741003	1.589
9.753336	1.549
9.898852	1.587
9.804924	1.453
9.877895	1.534
9.864523	1.797
9.810166	1.59
9.810035	1.75
9.86598	1.554
9.863661	1.385
9.891859	1.473
9.882643	1.501
9.973754	1.422
9.825206	1.422
9.881602	1.626
9.876613	1.549
9.866033	1.51
9.863378	1.666
9.836738	1.489
9.84905	1.506
9.862453	1.542
9.879899	1.899
9.878352	1.614
9.851239	1.485
9.876063	1.374
9.943266	1.469
9.999848	1.479
9.932294	1.408
9.983692	
9.927063	
9.9175	
9.81402	
9.903712	
9.077165	
9.099063	
9.183217	
9.072755	
9.034149	
9.043928	
9.018841	
9.045604	
9.133784	
9.047565	
9.001643	
9.080599	
9.142741	
9.113777	
9.072458	
9.077863	
9.126285	
9.14623	
9.122751	
9.053884	
9.096588	
9.162238	
9.055839	
9.05996	
9.094229	
9.0581	
9.081877	
9.107769	
9.090074	
9.104471	
9.034224	
9.100964	
9.012392	
9.083544	
9.126461	
9.156242	
9.082973	
9.024098	
9.115075	
9.007334	
9.015002	
9.027634	
9.173776	
9.096359	
9.108249	
9.131862	
9.061634	
9.120668	
9.13477	
9.142502	
9.025236	
9.012352	
9.064462	
9.043549	
9.081376	
9.110153	
9.147224	
9.124991	
9.033222	
9.083164	
9.088405	
8.988067	
9.057466	
9.036076	
9.023186	
9.026651	
9.139629	
9.101413	
9.093274	
9.073686	
9.071874	
9.068611	
9.144973	
9.061011	
9.040471	
9.135124	
9.184896	
9.162443	
9.183374	
9.118524	
9.121637	
9.105624	
9.16598	
9.110858	
9.146412	
9.108425	
9.200126	
9.074418	
9.128935	
9.1502	
9.200032	
9.129797	
9.154199	
9.185034	
9.15168	
9.160019	
9.119621	
9.257911	
9.203555	
9.150872	
9.180226	
9.104989	
9.105948	
9.162015	
9.141794	
9.147988	
9.247853	
9.217153	
9.223071	
9.152767	
9.15166	
9.201674	
9.134676	
9.194209	
9.177908	
9.167268	
9.151265	
9.158896	
9.243202	
9.188099	
9.110545	
9.087826	
9.066462	
9.118875	
9.18355	
9.216438	
9.227678	
9.167844	
9.214532	
9.236536	
9.244019	
9.226339	
9.208553	
9.25244	
9.238647	
9.209187	
9.210144	
9.240346	
9.160263	
9.231668	
9.138174	
9.201335	
9.223321	
9.229561	
9.203957	
9.205258	
9.240256	
9.217741	
9.278302	
9.210626	
9.256952	
9.21986	
9.172696	
9.193128	
9.190881	
9.248664	
9.197475	
9.111945	
9.119165	
9.061168	
9.171362	
9.192259	
9.144126	
9.115808	
9.194404	
9.169123	
9.178579	
9.201679	
9.167955	
9.191741	
9.231886	
9.173102	
9.181019	
9.280002	
9.178193	
9.267948	
9.194655	
9.174611	
9.169988	
9.194068	
9.241371	
9.261096	
9.299621	
9.275946	
9.270927	
9.261936	
9.177706	
9.178217	
9.142223	
9.156223	
9.156618	
9.224598	
9.145492	
9.164219	
9.236575	
9.179897	
9.225461	
9.193425	
9.236618	
9.214889	
9.294806	
9.246879	
9.212863	
9.183906	
9.179587	
9.121349	
9.1528	
9.137032	
9.114495	
9.255757	
9.158029	
9.197109	
9.20651	
9.23403	
9.198382	
9.287394	
9.211054	
9.189912	
9.189435	
9.216093	
9.234425	
9.246538	
9.226662	
9.235276	
9.211597	
9.272246	
9.195573	
9.243561	
9.148063	
9.215055	
9.271022	
9.288494	
9.339717	
9.327173	
9.337422	
9.264266	
9.282599	
9.334484	
9.342202	
9.341145	
9.337313	
9.395841	
9.368078	
9.323581	
9.310922	
9.322837	
9.322886	
9.222172	
9.208474	
9.306316	
9.407603	
9.302782	
9.319809	
9.307799	
9.306819	
9.283429	
9.29006	
9.319784	
9.278912	
9.356247	
9.258068	
9.301211	
9.223609	
9.274391	
9.181124	
9.277418	
9.274294	
9.268259	
9.355678	
9.243398	
9.305371	
9.287164	
9.298144	
9.26828	
9.320478	
9.278975	
9.278599	
9.217773	
9.226298	
9.26198	
9.294988	
9.329146	
9.306529	
9.249321	
9.273888	
9.331746	
9.297736	
9.273998	
9.218636	
9.321843	
9.231422	
9.298299	
9.333372	
9.227402	
9.211789	
9.277191	
9.294775	
9.304895	
9.258841	
9.308732	
8.400989	
8.310941	
8.310878	
8.314821	
8.275941	
8.265842	
8.305474	
8.318565	
8.293285	
8.285067	
8.311286	
8.268767	
8.267183	
8.262522	
8.23804	
8.252155	
8.28124	
8.340722	
8.220678	
8.266823	
8.254751	
8.36522	
8.288582	
8.289685	
8.282055	
8.300984	
8.253381	
8.279085	
8.33579	
8.245418	
8.278055	
8.212552	
8.314319	
8.420049	
8.359638	
8.292105	
8.332967	
8.321344	
8.116027	
8.156523	
8.162522	
8.139148	
8.29703	
8.335185	
8.270432	
8.207174	
8.243372	
8.248695	
8.388683	
8.260605	
8.258267	
8.301301	
8.281356	
8.217657	
8.280297	
8.334068	
8.212755	
8.26259	
8.357422	
8.208463	
8.307094	
8.257055	
8.169345	
8.234308	
8.184976	
8.287005	
8.199235	
8.303015	
8.235545	
8.300429	
8.299472	
8.260237	
8.285747	
8.250716	
8.252075	
8.295942	
8.314483	
8.223673	
8.258889	
8.237698	
8.238662	
8.270862	
8.162466	
8.201336	
8.209734	
8.388966	
8.200677	
8.179776	
8.266391	
8.321084	
8.322261	
8.33048	
8.248912	
8.255802	
8.316927	
8.293638	
8.302366	
8.199769	
8.137784	
8.203809	
8.157174	
8.136782	
8.253584	
8.288236	
8.399903	
8.294138	
8.327686	
8.168106	
8.254265	
8.211366	
8.235219	
8.28521	
8.197547	
8.223732	
8.206894	
8.235409	
8.246389	
8.250277	
8.34023	
8.304984	
8.297582	
8.240604	
8.322671	
8.2111	
8.260026	
8.231206	
8.322341	
8.351301	
8.285802	
8.358934	
8.333098	
8.373592	
8.278723	
8.366976	
8.263179	
8.313371	
8.266329	
8.22683	
8.28744	
8.266426	
8.283853	
8.330954	
8.326032	
8.242287	
8.285262	
8.310056	
8.308256	
8.425698	
8.288976	
8.225283	
8.283808	
8.243695	
8.243267	
8.286572	
8.309401	
8.297182	
8.347555	
8.310176	
8.367721	
8.312103	
8.263301	
8.311617	
8.365005	
8.287866	
8.319342	
8.332657	
8.303254	
8.259283	
8.240401	
8.290172	
8.324702	
8.254665	
8.25008	
8.268982	
8.290308	
8.228672	
8.217907	
8.265235	
8.360566	
8.356241	
8.33851	
8.230901	
8.335499	
8.303498	
8.292745	
8.239583	
8.323398	
8.299205	
8.302118	
8.288236	
8.261794	
8.274594	
8.281053	
8.321393	
8.327354	
8.301413	
8.288195	
8.307402	
8.289523	
8.25295	
8.311913	
8.301362	
8.299685	
8.349723	
8.324513	
8.203684	
8.198882	
8.201108	
8.243347	
8.230347	
8.296335	
8.207451	
8.226073	
8.22876	
8.211917	
8.22067	
8.208976	
8.186199	
8.172762	
8.139113	
8.218887	
8.248866	
8.330922	
8.285085	
8.233838	
8.144674	
8.203136	
8.179224	
8.118464	
8.084348	
8.25	
8.295985	
8.211368	
8.176624	
8.158903	
8.131396	
8.226253	
8.132866	
8.122771	
8.199998	
8.069019	
8.110477	
8.062499	
8.068205	
7.997986	
8.025955	
7.961774	
7.959229	
8.024943	
8.124864	
8.129038	
8.200191	
8.168438	
8.062732	
8.107546	
8.090875	
8.037471	
8.104722	
8.128619	
8.024909	
7.948004	
8.047711	
8.086918	
8.053471	
8.023019	
8.029602	
8.074048	
8.093558	
7.989011	
8.064531	
7.991398	
8.004887	
7.998207	
8.071982	
8.163853	
8.183979	
8.008286	
8.058317	
8.17086	
8.074985	
8.101126	
7.999857	
7.952991	
7.887295	
8.053794	
8.068369	
8.029595	
8.147987	
8.115073	
8.110669	
8.006839	
8.017525	
8.036302	
8.015053	
8.194459	
8.10015	
8.00773	
8.116524	
8.182712	
8.144885	
8.200158	
7.704218	
7.686324	
7.711769	
7.664879	
7.679948	
7.735239	
7.726435	
7.695755	
7.701006	
7.647623	
7.693019	
7.67668	
7.745238	
7.756378	
7.688002	
7.72387	
7.689393	
7.686146	
7.698363	
7.637914	
7.624099	
7.710072	
7.741278	
7.694798	
7.674511	
7.645949	
7.674325	
7.634083	
7.684101	
7.757545	
7.681652	
7.662721	
7.709449	
7.685698	
7.709634	
7.703357	
7.694943	
7.675005	
7.723855	
7.656216	
7.715234	
7.704692	
7.637741	
7.769679	
7.645909	
7.666359	
7.679842	
7.763372	
7.682331	
7.768698	
7.76837	
7.706369	
7.771307	
7.668361	
7.63799	
7.573897	
7.710386	
7.640757	
7.680957	
7.682252	
7.594225	
7.594576	
7.670456	
7.68209	
7.670483	
7.633756	
7.673291	
7.747059	
7.722911	
7.73062	
7.769341	
7.760093	
7.698156	
7.73754	
7.627899	
7.727344	
7.741941	
7.634835	
7.666359	
7.601137	
7.700173	
7.5886	
7.646673	
7.715923	
7.569617	
7.625607	
7.668761	
7.635308	
7.650888	
7.670839	
7.67552	
7.538678	
7.716367	
7.633597	
7.639103	
7.618401	
7.667966	
7.549334	
7.696063	
7.630978	
7.565699	
7.53287	
7.569376	
7.613181	
7.58504	
7.529825	
7.662553	
7.52006	
7.5607	
7.595837	
7.514049	
7.591399	
7.671195	
7.604842	
7.604048	
7.642382	
7.5578	
7.623734	
7.590569	
7.661503	
7.568545	
7.605499	
7.604164	
7.701485	
7.641848	
7.526866	
7.637503	
7.540826	
7.501198	
7.580242	
7.605755	
7.615827	
7.633295	
7.609519	
7.705167	
7.569765	
7.586664	
7.658111	
7.603836	
7.670214	
7.638003	
7.602147	
7.741198	
7.681952	
7.749866	
7.640965	
7.604371	
7.643239	
7.654931	
7.704345	
7.643452	
7.699624	
7.630497	
7.570456	
7.645711	
7.716571	
7.634725	
7.676579	
7.629142	
7.721052	
7.652461	
7.682154	
7.691876	
7.61968	
7.632322	
7.650418	
7.619493	
7.641279	
7.726158	
7.751777	
7.658643	
7.680634	
7.620773	
7.668816	
7.716524	
7.645187	
7.693827	
7.649089	
7.588773	
7.575746	
7.63398	
7.606636	
7.639417	
7.614157	
7.655238	
7.588436	
7.514703	
7.64358	
7.652247	
7.569774	
7.622104	
7.633906	
7.695385	
7.597311	
7.699628	
7.700193	
7.650469	
7.573148	
7.634974	
7.665163	
7.66568	
7.57708	
7.643808	
7.621199	
7.583159	
7.585342	
7.666916	
7.652335	
7.55017	
7.618342	
7.699028	
7.678204	
7.654393	
7.66444	
7.608213	
7.584612	
7.589505	
7.551758	
7.582555	
7.645421	
7.666409	
7.61005	
7.650458	
7.679347	
7.679121	
7.65823	
7.681265	
7.636419	
7.639685	
7.652458	
7.608884	
7.660593	
7.683041	
7.686536	
7.599244	
7.577131	
7.58777	
7.650903	
7.699812	
7.688815	
7.65628	
7.584719	
7.572464	
7.626483	
7.606318	
7.647001	
7.604332	
7.549076	
7.554749	
7.597926	
7.584579	
7.645732	
7.619173	
7.617117	
7.629475	
7.681905	
7.62809	
7.681332	
7.567748	
7.609795	
7.560967	
7.582604	
7.556408	
7.661133	
7.597106	
7.658699	
7.635265	
7.620501	
7.603884	
7.587721	
7.599416	
7.635532	
7.599074	
7.600584	
7.651257	
7.624176	
7.597201	
7.669449	
7.616019	
7.601632	
7.598279	
7.587563	
7.624333	
7.654556	
7.597187	
7.628749	
7.643792	
7.583097	
7.555177	
7.561083	
7.622104	
7.533107	
7.566719	
7.489465	
7.495266	
7.487872	
7.60456	
7.568405	
7.636894	
7.505319	
7.562413	
	
