# Supplementary material for: The role of scaffold reshaping and disassembly in dynamin driven membrane fission
Source: eLife journal article supplement (doi:10.7554/elife.39441), 2018-12-18
Supplement: supp [file elife-39441-supp-v1.zip › elife_poa_e39441_Figure_2_source_data_3.txt]

#  DATA FILE for Fig. 2f in the paper
#
#      "The role of scaffold reshaping and disassembly
#       in dynamin driven membrane fission"
#
#  by Martina Pannuzzo, Zachary A. McDargh, and Markus Deserno
#
#  published in eLife
#
#  -------------------------------------------------------------
#  Fission driven by CONSTRICTION and ROTATION
#  -------------------------------------------------------------
#  
#  Column 1: R  (scaffold radius, in units of sigma)
#  Column 2: Rg (gyration radius of neck, in units of sigma)
#  
17.807503	10.005
17.807503	10.168
17.718808	10.182
17.64464	10.145
17.589156	10.177
17.579751	10.131
17.818223	10.223
17.768975	10.237
17.565459	10.21
17.384953	10.316
17.507096	10.321
17.58189	10.165
17.669928	10.206
17.638942	10.23
17.630809	10.298
17.720268	10.177
17.441473	10.164
17.286012	10.333
17.28684	10.356
17.347732	10.497
17.376085	10.36
17.456257	10.484
17.580185	10.429
17.584215	10.431
17.671244	10.357
17.765663	10.384
17.686253	10.224
17.605636	10.245
17.687056	10.179
17.43496	10.17
17.410207	10.171
17.61758	10.236
17.686082	10.238
17.729663	10.179
17.825463	10.169
17.813947	10.281
17.921683	10.303
17.89762	10.332
18.047691	10.29
17.937444	10.271
17.911977	10.229
17.964735	10.334
17.900977	10.373
17.929614	10.418
17.8841	10.38
17.844093	10.362
17.645949	10.32
17.546003	10.273
17.603825	10.488
17.632551	10.206
17.81137	10.269
17.845664	10.246
17.815867	10.208
17.855194	10.178
17.832519	10.376
17.637784	10.314
17.716904	10.423
17.71889	10.475
17.526873	10.543
17.568005	10.63
17.548865	10.526
17.472584	10.354
17.622687	10.504
17.618686	10.355
17.626236	10.382
17.733979	10.381
17.778419	10.363
17.754913	10.375
17.691098	10.486
17.726084	10.546
17.775759	10.563
17.614852	10.611
17.740716	10.435
17.48133	10.55
17.439397	10.405
17.610774	10.284
17.631409	10.428
17.596349	10.601
17.525543	10.573
17.556094	10.622
17.574233	10.448
17.633331	10.402
17.553449	10.453
17.498952	10.427
17.495154	10.362
17.598181	10.477
17.427828	10.66
17.66525	10.545
17.62967	10.479
17.762265	10.463
17.730098	10.452
17.789616	10.517
17.827107	10.544
17.804772	10.704
17.778199	10.687
17.547052	10.698
17.493977	10.782
17.606075	10.693
17.526315	10.715
17.740789	10.559
17.771771	10.658
17.788964	10.637
17.609839	10.78
17.728991	10.772
17.626466	10.732
17.530171	10.754
17.621605	10.764
17.479651	10.747
17.601845	10.673
17.792222	10.85
17.790622	10.759
17.849125	10.847
17.779699	10.894
17.716597	10.848
17.682292	10.751
17.807727	10.874
17.529068	10.83
17.366314	10.799
17.255312	10.816
17.084681	10.837
17.354697	10.919
17.567992	10.81
17.611296	10.689
17.599365	10.819
17.533307	10.814
17.427706	10.69
17.390104	10.738
17.535542	10.646
17.499968	10.368
17.56478	10.419
17.65275	10.233
17.553741	10.353
17.586158	10.416
17.689405	10.523
17.533207	10.399
17.645979	10.461
17.59486	10.391
17.677593	10.374
17.622663	10.5
17.657385	10.576
17.697651	10.509
17.905967	10.57
17.862706	10.536
17.785768	10.576
17.706175	10.599
17.746125	10.633
17.811154	10.709
17.789269	10.561
17.875443	10.603
17.750216	10.558
17.860606	10.595
17.512876	10.629
17.63494	10.657
17.608288	10.577
17.521345	10.66
17.643029	10.603
17.604786	10.645
17.485062	10.534
17.624361	10.564
17.836841	10.658
17.816536	10.652
17.699479	10.635
17.723989	10.481
17.690466	10.443
17.47393	10.59
17.524378	10.516
17.554844	10.499
17.757835	10.472
17.59279	10.53
17.580859	10.491
17.749525	10.544
17.742835	10.537
17.397431	10.55
17.671731	10.629
17.372327	10.585
17.643558	10.721
17.829271	10.492
17.722354	10.643
17.79654	10.464
17.802008	10.352
17.834522	10.357
17.641978	10.265
17.825819	10.379
17.790568	10.496
17.746263	10.699
17.739238	10.598
17.702794	10.636
17.69871	10.664
17.496483	10.511
17.291054	10.54
17.448816	10.639
17.507773	10.608
17.552977	10.722
17.816897	10.65
17.844767	10.548
17.73061	10.42
17.609256	10.389
17.269452	10.609
17.400776	10.658
17.370295	10.585
17.590221	10.577
17.413378	10.713
17.343288	10.503
17.39277	10.595
17.463013	10.507
17.240938	10.592
17.376123	10.825
17.172995	10.753
17.526427	10.838
17.392904	10.782
17.533037	10.751
17.461671	10.928
17.304055	10.898
17.517586	10.895
17.549475	10.852
17.504409	10.844
17.685086	10.903
17.348988	10.761
17.461337	10.81
17.476847	10.816
17.479499	10.886
17.427035	10.847
17.364392	10.882
17.474	10.857
17.296339	10.985
17.309199	10.992
17.302021	10.908
17.424527	10.815
17.515962	10.629
17.542137	10.461
17.430994	10.512
17.556887	10.471
17.62976	10.487
17.643013	10.405
17.772523	10.536
17.67148	10.524
17.710927	10.364
17.678364	10.467
17.659519	10.436
17.713788	10.46
17.658992	10.55
17.411913	10.572
17.556844	10.463
17.626227	10.461
17.608052	10.227
17.578137	10.31
17.564808	10.37
17.537401	10.378
17.461155	10.413
17.385697	10.34
17.556206	10.43
17.31706	10.518
17.324994	10.546
17.402715	10.486
17.46597	10.506
17.47651	10.796
17.335924	10.729
17.494994	10.791
17.346118	10.631
17.556386	10.466
17.665848	10.513
17.718539	10.549
17.333176	10.624
17.190759	10.51
17.186966	10.525
17.596089	10.407
17.650013	10.277
17.489477	10.471
17.489178	10.375
17.611251	10.442
17.544827	10.57
17.511343	10.75
17.551731	10.662
17.378806	10.6
17.492976	10.599
17.535877	10.411
17.462964	10.632
17.322601	10.602
17.374856	10.46
17.364127	10.454
17.245067	10.53
17.371747	10.651
17.322941	10.556
17.338057	10.557
17.197354	10.647
17.35663	10.592
17.622584	10.66
17.506365	10.523
17.635411	10.483
17.659662	10.6
17.627125	10.611
17.657732	10.702
17.617208	10.64
17.58861	10.609
17.594633	10.65
17.594814	10.645
17.56023	10.607
17.624403	10.802
17.504425	10.748
17.62557	10.852
17.64089	10.868
17.033365	10.87
16.920523	10.899
16.973479	10.994
16.930204	10.885
16.970615	10.843
17.074271	10.874
16.991613	10.929
16.902989	10.674
16.917618	10.802
16.908726	10.854
17.061882	10.648
16.997396	10.6
16.859091	10.573
16.958654	10.548
17.033837	10.622
16.976458	10.701
17.081292	10.707
17.143615	10.519
16.907734	10.5
16.889983	10.526
17.052545	10.485
17.05616	10.564
17.02753	10.445
16.874397	10.372
16.97652	10.404
17.049488	10.439
17.149056	10.432
17.110968	10.409
17.138858	10.196
16.995332	10.195
16.942321	10.18
16.848828	10.177
16.862223	10.129
16.800633	10.252
16.885611	10.261
16.881448	10.253
16.866288	10.312
16.99842	10.221
16.9574	10.221
17.018149	10.145
17.042635	10.124
17.064389	10.157
16.936575	10.275
17.033712	10.207
17.09627	10.044
17.050505	10.295
17.00632	10.343
16.946561	10.273
16.936417	10.268
16.977512	10.351
16.919404	10.206
16.866325	10.392
17.1228	10.307
17.11655	10.342
17.026369	10.299
17.06837	10.287
17.046766	10.439
16.942328	10.409
16.872176	10.554
16.873185	10.487
16.910757	10.437
16.765394	10.567
16.848282	10.6
16.841881	10.602
16.974682	10.548
17.049262	10.542
16.93778	10.499
17.058401	10.424
16.968791	10.547
17.209603	10.382
17.278637	10.4
17.324768	10.346
17.148592	10.356
16.931057	10.399
16.953182	10.298
16.889207	10.436
16.882783	10.331
16.858135	10.264
16.802798	10.29
16.812881	10.353
16.821462	10.367
16.921779	10.464
16.822541	10.44
16.807366	10.473
16.853964	10.435
16.843808	10.349
16.811917	10.264
17.026648	10.278
17.074601	10.101
17.093941	10.116
16.995797	10.1
17.14684	10.15
17.03131	10.157
17.070959	10.213
17.144075	10.174
17.13089	10.22
16.974665	10.185
17.141056	10.176
17.193696	10.191
17.219343	10.113
17.108556	10.051
17.052955	10.145
17.130444	10.249
17.212767	10.3
17.10157	10.194
17.105697	10.335
17.050977	10.32
16.961571	10.387
16.958227	10.259
16.921098	10.188
16.90822	10.237
16.743306	10.159
16.520078	10.088
16.696649	10.189
16.734428	10.252
16.756908	10.269
16.731458	10.241
16.947712	10.315
16.951928	10.148
16.925653	10.209
16.949462	10.277
17.01472	10.159
16.940153	10.069
16.89466	10.121
16.903976	10.227
16.98621	10.066
17.214692	10.043
17.060848	9.972
17.07991	10.046
17.055203	10.026
17.096121	10.075
17.087637	9.995
16.935826	10.132
16.986851	10.084
16.870469	10.166
16.852693	10.206
16.977412	10.387
16.764467	10.168
16.872614	10.21
16.883063	10.211
17.042435	10.192
16.867307	10.211
16.786341	10.119
16.874781	10.099
16.900826	10.145
16.882029	10.125
17.010021	10.108
17.031992	10.113
16.916572	10.173
16.958151	10.299
17.013881	10.202
16.971578	10.213
17.006385	10.211
16.963527	10.203
16.869469	10.326
16.915127	10.342
16.89145	10.336
17.07431	10.215
17.119	10.353
16.985436	10.391
16.981951	10.326
16.853473	10.363
16.70914	10.339
16.74099	10.3
16.811668	10.23
16.839502	10.208
16.973362	10.183
16.885486	10.145
16.974256	10.074
16.934347	10.211
16.922393	10.212
16.876515	10.126
16.820052	10.035
16.863023	10.038
16.854638	10.104
16.871591	9.95
16.846748	10
16.681826	9.908
16.828108	9.806
16.75252	9.745
16.801925	9.854
16.735565	9.868
16.82151	9.827
16.696846	9.821
16.540847	9.871
16.728869	9.944
16.767024	9.935
16.668645	10.057
16.641762	9.839
16.897818	9.936
16.66333	9.792
16.768948	9.783
16.90527	9.934
16.794664	9.906
16.87636	9.969
16.83128	9.886
16.790793	10.004
16.843663	10.036
16.597588	10.059
16.618711	10.033
16.817168	10.059
16.801946	9.996
16.696886	10.058
16.781769	10.062
16.656753	10.089
16.633506	10.176
16.634217	10.096
16.623692	10.18
16.759499	10.109
16.729361	10.081
16.804216	10.149
16.730105	10.105
16.782614	10.004
16.651539	10.015
16.853881	9.958
17.041951	9.942
16.760365	9.946
16.914893	9.877
16.632199	9.891
17.034093	9.909
16.935495	10.047
16.879719	9.881
16.928923	9.943
16.992394	9.701
16.899912	9.832
16.842122	9.665
16.991041	9.693
16.853086	9.748
16.797983	9.825
16.668867	9.75
16.639944	9.779
16.772918	9.705
16.866911	9.609
16.79779	9.651
16.661097	9.792
16.44593	9.703
16.413166	9.829
16.545011	9.805
16.889247	9.837
16.917089	9.84
16.870916	9.834
16.885759	9.866
16.887651	9.73
16.811205	9.631
16.991565	9.656
16.949098	9.566
16.975316	9.84
17.021943	9.879
16.920253	9.833
16.832236	9.8
16.925169	9.845
17.001729	9.974
17.024884	10.033
17.084858	10.119
16.928858	10.132
16.956028	10.215
16.862026	10.183
16.846282	10.222
16.815859	10.223
16.824128	10.044
16.881833	10.298
16.880258	9.96
16.776119	10.016
16.942929	9.904
16.989768	9.918
16.912632	9.846
16.796323	9.817
16.742731	9.846
16.735681	9.876
16.759844	9.976
16.650721	10.065
16.687775	9.957
16.711496	9.903
16.785982	9.739
16.723101	9.841
16.701759	10.057
16.663078	10.063
16.708223	10.039
16.790317	10.095
16.801808	10.047
16.666672	10.122
16.70531	10.224
16.826823	10.123
16.614981	10.163
16.602201	10.347
16.475937	10.311
16.517371	10.29
16.485653	10.288
16.584953	10.24
16.684177	10.183
16.807339	10.134
16.860235	10.122
16.768684	10.061
16.807876	9.983
16.737728	10.081
16.739446	9.979
16.606263	10.052
16.548118	9.944
16.670928	9.949
16.714226	9.993
16.234694	9.915
16.192118	9.811
16.226434	9.868
16.283117	10.037
16.242112	9.974
16.269264	10.145
16.239228	10.118
16.208705	10.069
16.275825	10.062
16.274853	10.095
16.307562	9.984
16.318561	10.022
16.295445	10.039
16.194021	9.942
16.31083	9.923
16.36899	9.901
16.33747	9.842
16.340988	9.869
16.343013	9.78
16.324739	9.755
16.303321	9.673
16.425094	9.634
16.350781	9.771
16.386663	9.628
16.375054	9.551
16.090994	9.57
16.229993	9.493
16.042086	9.519
16.123907	9.431
16.257036	9.403
16.25961	9.444
16.2731	9.553
16.284444	9.519
16.299413	9.541
16.243387	9.56
16.192456	9.451
16.210682	9.444
16.180023	9.583
16.275312	9.664
16.296789	9.654
16.328581	9.637
16.29991	9.664
16.371681	9.566
16.316127	9.695
16.289684	9.618
16.210998	9.738
16.036678	9.729
16.184158	9.73
16.258864	9.616
16.232841	9.756
16.158739	9.706
16.175293	9.787
16.173972	9.494
16.090683	9.565
16.188607	9.62
16.238123	9.743
16.227379	9.748
16.092134	9.805
15.989155	9.747
16.020402	9.669
16.079821	9.834
16.010609	9.91
16.128753	9.797
16.062961	9.903
16.19426	9.605
16.213017	9.663
16.152335	9.574
16.155436	9.601
16.121295	9.753
16.186538	9.687
16.30947	9.673
16.278633	9.583
16.280628	9.607
16.404071	9.447
16.388911	9.349
16.333201	9.422
16.365775	9.586
16.465533	9.402
16.504546	9.632
16.497378	9.587
16.506259	9.468
16.352261	9.608
16.208981	9.699
16.262778	9.682
16.246049	9.754
16.163026	9.731
16.329356	9.656
16.311754	9.638
16.306966	9.487
16.265884	9.462
16.259087	9.321
16.131678	9.445
16.276922	9.454
16.339624	9.401
16.282296	9.39
16.196572	9.512
16.267364	9.438
16.140252	9.437
16.306815	9.471
16.296925	9.432
16.415689	9.368
16.389551	9.447
16.396379	9.485
16.386495	9.423
16.402642	9.43
16.421753	9.49
16.416003	9.504
16.342137	9.536
16.329299	9.643
16.232884	9.685
16.279048	9.497
16.270228	9.477
16.28615	9.458
16.346636	9.561
16.290679	9.645
16.318472	9.679
16.333457	9.681
16.393139	9.783
16.198596	9.648
16.185381	9.623
16.206709	9.506
16.292123	9.415
16.198576	9.384
16.263453	9.465
16.209774	9.37
16.067461	9.372
16.109211	9.47
16.081256	9.479
16.227085	9.496
16.158774	9.385
16.202102	9.386
16.245412	9.404
16.342245	9.187
16.353254	9.282
16.193081	9.313
16.317256	9.251
16.355615	9.221
16.319798	9.223
16.302551	9.384
16.257714	9.325
16.160247	9.322
16.121574	9.331
16.152382	9.331
16.083007	9.438
16.100688	9.315
16.025271	9.442
16.083526	9.494
16.10128	9.504
16.192414	9.544
16.177199	9.67
16.12864	9.771
16.244637	9.709
16.259119	9.713
16.277513	9.703
16.356215	9.697
16.495449	9.745
16.374566	9.7
16.333226	9.657
16.367139	9.749
16.348504	9.589
16.278855	9.771
16.205982	9.514
16.158561	9.601
16.156368	9.491
16.146884	9.612
16.126297	9.643
16.192164	9.74
16.244605	9.548
16.206532	9.515
16.224854	9.472
16.080061	9.494
16.247342	9.522
16.151109	9.481
16.146595	9.447
16.245848	9.438
16.232446	9.47
16.190997	9.484
16.19058	9.5
16.175494	9.455
16.343059	9.426
16.478786	9.403
16.471616	9.321
16.24318	9.226
16.088478	9.242
16.039016	9.255
16.202143	9.209
16.16505	9.131
16.002729	9.115
16.035101	9.059
16.290463	9.085
16.353117	9.15
16.299336	9.167
16.201719	9.039
16.171122	8.914
16.224761	9.025
16.291201	8.992
16.364592	9.1
16.249697	9.051
16.225719	9.032
16.152796	9.132
16.223756	9.205
16.087236	9.217
16.078488	9.229
16.085849	9.186
16.211668	8.99
16.351001	9.184
16.319071	9.023
16.323629	9.054
16.456357	9.047
16.367301	9.212
16.355042	9.122
16.198808	9.096
16.280084	9.212
16.201577	9.017
16.314419	9.105
16.29097	9.14
16.172762	9.228
16.162103	9.221
16.279231	9.055
16.285589	9.041
16.348676	8.978
16.342846	8.999
16.444337	9.202
16.392913	9.088
16.333244	9.044
16.317911	8.909
16.337801	8.907
16.37165	8.972
16.306913	9.013
16.377187	8.83
16.339785	8.874
16.323705	8.988
16.314909	9.072
16.34075	9.045
16.442434	9.078
16.312429	9.206
16.284919	9.253
16.308684	9.36
16.493363	9.479
16.449311	9.489
16.388077	9.45
16.32167	9.384
16.225049	9.384
16.132826	9.34
16.255108	9.382
16.291068	9.434
16.314683	9.52
16.464346	9.469
16.579518	9.415
16.569322	9.331
16.462156	9.321
16.499914	9.234
16.467403	9.183
16.445732	9.273
16.488849	9.097
16.47917	9.343
16.485664	9.248
16.600101	9.326
16.547476	9.341
16.470778	9.351
16.446574	9.295
16.460434	9.254
16.220945	9.213
16.146524	9.371
16.106718	9.418
16.110577	9.427
16.094648	9.273
16.008036	9.36
16.000938	9.351
16.078786	9.325
16.044773	9.262
16.056276	9.114
16.215055	9.185
16.20487	9.203
16.186938	9.181
16.262562	9.363
16.255883	9.466
16.388871	9.471
16.380523	9.494
16.406598	9.506
16.427986	9.477
16.310872	9.495
16.120799	9.432
16.220191	9.339
16.237435	9.257
16.358667	9.351
16.373865	9.345
16.502794	9.199
16.299047	9.338
16.256699	9.373
16.305106	9.323
16.329988	9.284
16.374556	9.331
16.397735	9.364
16.326227	9.311
16.392629	9.309
16.380345	9.278
16.310872	9.494
16.238685	9.471
16.358813	9.466
15.563094	9.639
15.360404	9.576
15.352215	9.541
15.388457	9.592
15.335599	9.362
15.299201	9.427
15.232007	9.31
15.212702	9.182
15.257859	9.262
15.447578	9.303
15.580763	9.417
15.460571	9.42
15.318193	9.398
15.309429	9.163
15.391253	9.121
15.397492	9.204
15.447616	9.211
15.320446	9.281
15.351129	9.323
15.397997	9.33
15.407373	9.313
15.409831	9.288
15.397493	9.105
15.370264	9.055
15.27761	9.177
15.265543	9.22
15.36452	9.104
15.509353	9.224
15.502244	9.113
15.60749	8.996
15.603844	9.086
15.534544	8.94
15.505226	8.897
15.372074	9.02
15.27136	9.19
15.315681	9.167
15.272801	9.112
15.332849	9.008
15.247409	8.937
15.245902	9.009
15.246977	8.982
15.235831	9.116
15.287699	9.115
15.298104	9.167
15.28592	9.144
15.25082	9.017
15.414688	9.039
15.331919	8.872
15.310662	8.86
15.280002	9.182
15.375084	9.058
15.290779	8.905
15.375181	9.04
15.448472	8.996
15.330302	8.893
15.251946	8.872
15.245511	8.844
15.317411	8.842
15.333109	8.713
15.339686	8.679
15.31184	8.717
15.261049	8.845
15.262211	8.887
15.226518	8.908
15.238774	8.977
15.268455	9.041
15.251278	9
15.368304	9.122
15.390668	9.116
15.405602	8.945
15.355776	8.912
15.437485	8.82
15.425979	8.811
15.511834	8.766
15.440208	8.67
15.41098	8.829
15.345578	8.932
15.33789	8.861
15.417313	8.777
15.408149	8.782
15.353479	8.693
15.39298	8.861
15.385396	8.767
15.410719	8.598
15.346726	8.696
15.330486	8.733
15.351254	8.873
15.360849	8.719
15.272987	8.818
15.223174	8.748
15.29241	8.729
15.310629	8.687
15.334163	8.686
15.368236	8.667
15.385342	8.753
15.347915	8.644
15.335984	8.729
15.287178	8.708
15.224427	8.565
15.20972	8.541
15.319723	8.497
15.382897	8.545
15.499001	8.606
15.465633	8.585
15.467778	8.611
15.35715	8.695
15.26436	8.603
15.42215	8.587
15.252366	8.731
15.215888	8.654
15.345006	8.723
15.267858	8.595
15.270586	8.63
15.265674	8.698
15.160957	8.774
15.260346	8.721
15.28652	8.748
15.364315	8.798
15.420504	8.714
15.336597	8.636
15.325081	8.634
15.338736	8.669
15.313489	8.652
15.283694	8.621
15.200405	8.734
15.236175	8.622
15.344581	8.595
15.309102	8.723
15.355469	8.627
15.203224	8.653
15.289517	8.907
15.331941	8.949
15.350223	8.75
15.399473	8.787
15.39874	8.896
15.358999	8.817
15.445442	8.819
15.469277	8.826
15.530035	8.675
15.513175	8.646
15.514567	8.678
15.46778	8.727
15.545203	8.728
15.506055	8.786
15.357394	8.812
15.39734	8.742
15.341661	8.772
15.434875	8.762
15.29322	8.803
15.276335	8.723
15.213977	8.708
15.326582	8.614
15.29955	8.573
15.287172	8.781
15.332681	8.637
15.246097	8.682
15.344772	8.678
15.190074	8.718
15.331292	8.677
15.231552	8.556
15.288935	8.591
15.146969	8.503
15.159161	8.642
15.201712	8.635
15.210002	8.502
15.273318	8.394
15.175842	8.56
15.033328	8.598
15.116076	8.623
15.174359	8.661
15.208365	8.68
15.199696	8.732
15.196699	8.807
15.290143	8.783
15.404915	8.703
15.429841	8.839
15.386779	8.94
15.437397	8.856
15.484024	8.787
15.490054	8.882
15.470174	8.791
15.528848	9.038
15.483261	8.934
15.454394	8.899
15.537815	8.837
15.502463	8.869
15.451416	9.048
15.443034	8.878
15.432758	8.851
15.359917	8.854
15.432855	8.893
15.370367	8.811
15.37689	8.969
15.337919	8.898
15.373648	8.983
15.323847	8.927
15.398284	9.006
15.379965	9
15.359024	8.887
15.331036	8.967
15.359112	8.773
15.513175	8.672
15.504544	8.684
15.41292	8.782
15.369383	8.672
15.386279	8.744
15.395022	8.801
15.360064	8.849
15.438343	8.882
15.426229	8.886
15.474118	8.866
15.438822	8.901
15.413717	9.034
15.36891	9.137
15.370948	9.272
15.349985	9.179
15.447928	9.027
15.449994	8.891
15.306499	8.78
15.408169	8.942
15.424896	9.082
15.44333	9.046
15.393532	9.099
15.301761	8.987
15.282427	9.103
15.290135	9.174
15.254093	9.024
15.300213	8.932
15.240413	8.986
15.177818	8.954
15.246286	8.936
15.378447	8.765
15.39701	8.836
15.357469	8.965
15.280828	8.925
15.26061	8.879
15.266719	8.817
15.29824	8.803
15.341583	8.743
15.288699	8.644
15.276874	8.827
15.403145	8.815
15.415075	8.745
15.43693	8.822
15.554351	8.724
15.41701	8.712
15.236879	8.58
15.212068	8.832
15.118493	8.892
15.16073	8.84
15.302582	8.736
15.260791	8.725
15.271256	8.721
15.342468	8.686
15.338092	8.775
15.298058	8.626
15.327846	8.606
15.439649	8.524
15.449451	8.592
15.433746	8.533
15.422272	8.583
15.411893	8.498
15.396307	8.662
15.496381	8.62
15.458107	8.606
15.556596	8.753
15.5389	8.794
15.427667	9.04
15.464355	8.877
15.461052	8.941
15.408201	8.935
15.372703	8.959
15.317403	8.928
15.260749	8.889
15.280378	8.818
15.331921	8.909
15.354197	8.989
15.342285	8.895
15.407175	8.898
15.342523	8.719
15.212762	8.709
15.257758	8.87
15.248022	8.849
15.34013	8.795
15.200049	8.769
15.098453	8.728
15.084859	8.903
15.036304	8.982
15.119832	8.916
15.220423	9.071
15.217616	8.824
15.168048	9.052
15.265478	9.152
15.090274	9.094
15.229557	8.972
15.338825	8.839
15.334158	9.008
15.410901	8.813
15.446666	8.72
15.515551	8.055
15.554176	8.899
14.46394	8.957
14.411301	9.132
14.387911	9.005
14.38905	8.877
14.322502	8.885
14.346599	8.761
14.336659	8.907
14.437409	8.818
14.410785	8.76
14.38871	8.809
14.476254	8.585
14.515834	8.573
14.548305	8.587
14.528585	8.581
14.496293	8.502
14.616818	8.511
14.622846	8.307
14.557602	8.401
14.539652	8.209
14.474484	8.22
14.530687	8.293
14.470394	8.239
14.561153	8.237
14.443959	8.308
14.384238	8.214
14.350555	8.23
14.454208	8.19
14.485493	8.253
14.448492	8.193
14.503913	8.212
14.44619	8.145
14.446196	8.065
14.437417	7.872
14.335158	7.954
14.279715	7.911
14.261408	7.894
14.258013	7.877
14.319366	7.804
14.33565	7.824
14.316677	7.797
14.323364	7.845
14.280271	7.937
14.389669	7.894
14.332565	7.771
14.416443	7.799
14.475428	7.77
14.530748	7.806
14.417957	7.762
14.455774	7.926
14.306388	7.837
14.265593	7.849
14.256418	7.905
14.216757	7.916
14.312435	7.712
14.411474	7.811
14.461391	7.7
14.377093	7.682
14.401164	8.102
14.331484	8.075
14.28172	7.866
14.268729	7.864
14.21876	7.853
14.292007	7.78
14.308254	7.979
14.44	7.979
14.413605	7.842
14.457903	7.828
14.434942	7.978
14.373261	7.905
14.415091	7.97
14.399855	7.947
14.252119	7.922
14.293685	7.815
14.275216	7.959
14.348047	7.792
14.426764	7.966
14.4394	7.876
14.398718	7.846
14.358139	7.955
14.384258	7.887
14.40043	7.905
14.339556	7.934
14.383576	7.871
14.42291	7.962
14.350908	8.088
14.375243	7.996
14.361536	8.124
14.397754	8.041
14.437826	8.044
14.434385	7.893
14.54787	7.901
14.492183	7.958
14.489781	7.91
14.416482	8.087
14.390724	8.171
14.531536	8.197
14.486193	8.005
14.467324	7.982
14.486329	8.031
14.438548	7.939
14.594159	8.021
14.59241	8.056
14.447626	8.104
14.55371	8.009
14.546556	7.918
14.450965	7.832
14.442872	7.723
14.311896	7.792
14.294229	7.608
14.220826	7.765
14.241794	7.707
14.29296	7.618
14.328037	7.597
14.293415	7.64
14.234362	7.498
14.242911	7.659
14.246298	7.742
14.262031	7.661
14.306169	7.643
14.296413	7.778
14.393044	7.731
14.452569	7.887
14.525864	7.888
14.394642	7.935
14.323643	7.888
14.336325	7.685
14.333943	7.723
14.332089	7.591
14.482541	7.779
14.545389	7.735
14.45898	7.609
14.332542	7.814
14.357215	7.882
14.293264	7.712
14.291369	7.855
14.263397	7.737
14.308152	7.657
14.380027	7.868
14.289878	7.728
14.198518	7.862
14.128947	7.956
14.160054	7.814
14.163759	7.853
14.194159	7.861
14.209445	7.933
14.207925	8.045
14.261823	8.103
14.36781	7.906
14.380743	7.628
14.44989	7.624
14.526632	7.639
14.363081	7.594
14.308515	7.618
14.311592	7.634
14.489363	7.793
14.510248	7.796
14.333461	8.001
14.400044	7.703
14.434504	7.875
14.318442	7.785
14.304277	7.824
14.285039	7.808
14.249491	7.585
14.307331	7.716
14.272503	7.734
14.287732	7.807
14.297841	7.63
14.346711	7.683
14.326546	7.633
14.247094	7.6
14.287204	7.527
14.311149	7.583
14.219909	7.739
14.304432	7.706
14.367188	7.579
14.227175	7.496
14.258779	7.602
14.328034	7.469
14.296486	7.559
14.198152	7.683
14.208755	7.889
14.214281	7.856
14.210956	7.887
14.368321	7.761
14.381992	7.758
14.407568	7.728
14.330106	7.703
14.454129	7.532
14.352131	7.63
14.205993	7.616
14.242269	7.55
14.31145	7.637
14.257787	7.687
14.327962	7.641
14.405812	7.587
14.403297	7.503
14.395908	7.654
14.407058	7.657
14.29523	7.782
14.326456	7.786
14.331653	7.718
14.339015	7.709
14.297431	7.683
14.27773	7.703
14.208775	7.749
14.274838	7.712
14.267641	7.739
14.172858	7.684
14.381031	7.787
14.44333	7.854
14.463812	7.877
14.524713	7.902
14.505506	8.054
14.373538	7.974
14.518127	7.965
14.556919	7.972
14.500204	8.132
14.446174	8.036
14.371511	8.023
14.342508	7.907
14.406534	7.728
14.377229	7.78
14.28799	7.919
14.323216	7.962
14.324771	8.111
14.269554	8.03
14.230115	8.136
14.261522	7.893
14.252502	7.993
14.319388	8.258
14.388963	8.36
14.464616	8.194
14.458853	8.268
14.503598	7.985
14.377947	8.159
14.547744	7.973
14.547961	8.063
14.577223	8.037
14.558912	7.895
14.4652	7.865
14.354586	7.828
14.287317	7.879
14.343684	7.692
14.260071	7.814
14.40907	7.807
14.299571	7.691
14.321373	7.956
14.271442	7.869
14.49828	7.877
14.532984	7.957
14.542854	7.949
14.491251	7.968
14.458801	7.822
14.498921	8.126
14.51644	7.943
14.474896	8.017
14.484123	8.051
14.415888	7.982
14.472467	8.067
14.572329	8.016
14.590583	7.991
14.4473	7.848
14.359281	7.929
14.365229	7.875
14.366454	7.885
14.438283	7.907
14.562079	7.793
14.509663	7.88
14.536969	7.743
14.513729	7.874
14.384558	7.835
14.41839	7.763
14.33796	7.765
14.274156	7.918
14.23071	8.074
14.345742	7.97
14.381951	7.949
14.317271	7.815
14.465669	7.643
14.330006	7.817
14.157244	7.97
14.158687	7.951
14.27319	8.013
14.298515	7.964
14.406716	7.772
14.486642	7.854
14.482382	7.85
14.51409	7.838
14.315426	7.904
14.377188	7.914
14.312053	7.941
14.263665	7.961
14.348578	8.055
14.350161	8.14
14.337343	8.088
14.277208	8.08
14.280886	8.018
14.376701	7.974
14.339957	8.039
14.437415	8.07
13.022537	8.219
12.896194	7.954
13.070175	7.99
13.110417	8.013
13.104212	7.887
13.102177	7.77
13.204951	7.693
13.10355	7.815
13.135495	7.657
13.19489	7.694
13.109599	7.775
13.18851	7.597
13.101621	7.694
13.055328	7.43
13.188444	7.62
13.182632	7.418
13.164751	7.416
13.07596	7.232
12.998281	7.15
12.997916	7.152
12.840146	7.271
13.122644	7.378
13.188458	7.318
13.218996	7.341
13.226589	7.479
13.261079	7.282
13.276129	7.441
13.129841	7.234
13.235745	7.237
13.183256	7.304
13.109576	7.255
13.217488	7.127
13.185202	7.131
13.257121	6.962
13.20255	7.037
13.2664	6.966
13.158857	7.066
13.250493	7.119
13.179688	7.066
13.166443	7.056
13.04431	6.826
13.024021	7.016
13.097792	6.842
13.18417	6.77
13.122284	6.676
13.197389	6.747
13.275285	6.674
13.156201	6.841
13.294901	7.008
13.195062	6.89
13.164787	6.887
13.031526	7.074
13.11813	7.047
13.084698	6.849
13.228349	6.916
13.184847	6.863
13.218318	6.858
13.270349	6.927
13.217274	6.928
13.176976	6.955
13.00292	6.958
13.048897	7.012
12.998803	7.021
12.971005	6.982
13.059783	7.019
13.006503	6.984
13.102359	7.017
13.153556	7.023
13.157032	6.932
13.216512	7.044
13.245716	6.987
13.275046	7.089
13.358879	7.136
13.251188	7.003
13.124585	7.216
13.145833	7.125
13.163922	7.057
13.168621	6.937
13.222196	7.101
13.137791	7.061
13.177881	7.195
13.172252	7.198
13.213068	7.097
13.250379	7.135
13.211181	7.199
13.244666	6.977
13.187654	6.843
13.237369	6.99
13.17555	6.954
13.239184	6.818
13.115424	6.712
13.15691	6.724
13.141228	6.823
13.315342	6.911
13.271762	6.719
13.223918	6.767
13.1015	6.667
13.154969	6.46
13.194704	6.497
13.093	6.442
13.240329	6.457
13.085518	6.371
13.233869	6.392
13.214867	6.345
13.285995	6.42
13.284996	6.587
13.284225	6.294
13.150362	6.282
13.169825	6.342
13.184862	6.385
13.14073	6.405
13.146856	6.575
13.186815	6.537
13.240403	6.579
13.230704	6.845
13.388253	6.864
13.380772	6.85
13.328008	6.883
13.27622	6.72
13.244641	6.709
13.309348	6.903
13.310862	6.839
13.210574	6.923
13.164213	6.894
13.176992	7.015
13.113538	6.75
13.176962	6.743
13.15762	6.814
13.199906	6.882
13.171195	6.659
13.189321	6.856
13.084356	6.829
13.224784	6.869
13.249452	7.015
13.302044	7.08
13.244756	7.135
13.182693	7.141
13.206221	6.995
13.131161	7.201
13.124685	6.983
13.184515	6.725
13.195375	6.8
13.217587	7.094
13.090278	7.209
12.988815	7.078
12.978221	7.095
13.19752	7.221
13.282619	7.196
13.145082	7.072
13.114831	7.002
13.126887	7.284
13.191593	7.21
13.016534	7.097
13.146964	6.934
13.268451	6.973
13.25761	6.776
13.270166	6.916
13.170112	6.651
13.196364	6.757
13.082202	6.67
13.172474	6.618
13.131714	6.535
13.108031	6.688
13.090733	6.673
13.094919	6.679
13.032237	6.791
13.170199	6.747
13.085264	6.884
13.115708	6.61
13.132775	6.689
13.180489	6.441
13.176801	6.605
13.120124	6.582
13.071122	6.85
13.094401	6.609
13.119485	6.491
13.195438	6.504
13.204194	6.346
13.144822	6.405
13.087808	6.394
13.061316	6.583
13.06379	6.529
13.081389	6.391
12.902489	6.62
12.939481	6.475
12.908218	6.587
13.08395	6.406
13.133834	6.545
13.06523	6.539
13.009865	6.663
13.063565	6.422
13.053014	6.606
13.115699	6.57
13.217703	6.484
13.14229	6.598
13.182338	6.316
13.06726	6.564
13.1649	6.541
13.036995	6.401
13.077594	6.468
12.942635	6.529
13.07632	6.585
13.089952	6.555
13.084367	6.68
13.217676	6.668
13.122789	6.633
13.158861	6.532
13.026254	6.368
13.129277	6.497
13.13211	6.603
13.07011	6.586
13.134355	6.494
13.209909	6.411
13.210973	6.622
13.171171	6.663
13.007274	6.713
13.062871	6.677
13.083811	6.611
13.174239	6.443
13.167078	6.565
13.109102	6.267
13.229409	6.456
13.19824	6.59
13.070701	6.55
13.225847	6.606
13.207679	6.616
13.198759	6.712
13.146407	6.718
13.258523	6.643
12.964695	6.534
13.053467	6.639
12.961097	6.677
12.959629	7.002
12.90504	6.799
13.089271	6.718
13.020193	6.702
13.229759	6.676
13.149541	6.471
13.124296	6.458
13.120504	6.556
13.066298	6.718
13.108007	6.53
13.218143	6.393
13.187318	6.547
13.072773	6.633
13.099156	6.652
13.137991	6.583
13.211781	6.809
13.181734	6.661
13.02027	6.819
13.166377	6.791
13.273868	6.488
13.169862	6.455
13.170098	6.496
13.097822	6.747
13.16158	6.942
13.165646	6.823
13.040154	6.802
12.989184	6.816
13.196375	6.717
13.118261	6.696
13.029772	6.791
13.154012	6.72
13.009972	6.544
13.188745	6.686
13.143646	6.82
13.150856	6.662
13.11688	6.875
13.233182	6.725
13.095741	6.579
13.214822	6.706
13.100749	6.882
13.255783	6.714
13.139966	6.9
13.16763	6.668
13.159596	6.776
13.137759	6.586
13.09401	6.666
13.155681	6.434
13.10727	6.567
13.048934	6.521
13.063092	6.365
13.049057	6.402
13.090081	6.21
13.124108	6.161
13.038504	6.212
13.148831	6.317
13.092312	6.329
13.115974	6.305
13.159429	6.373
13.125739	6.391
13.103073	6.456
12.969624	6.356
12.862574	6.518
13.045096	6.406
13.129695	6.467
13.067416	6.485
13.209422	6.53
13.168695	6.372
13.163916	6.627
12.216549	6.744
12.112413	6.66
12.192639	6.654
12.163912	6.413
12.112731	6.378
12.313745	6.314
12.361964	6.268
12.29959	6.221
12.263507	6.158
12.360182	6.044
12.281501	6.03
12.212939	5.794
12.148298	5.852
12.218893	5.701
12.099857	5.769
12.206336	5.903
12.239491	6.18
12.140678	5.807
12.232117	5.91
12.187221	5.874
12.19577	5.896
12.266429	6.064
12.227312	6.034
12.199668	6.035
12.268726	5.84
12.197692	5.727
12.279321	6.064
12.238937	5.721
12.249013	5.684
12.270242	5.593
12.257	5.656
12.227203	5.653
12.167801	5.552
12.146581	5.504
12.186219	5.445
12.181413	5.624
12.163284	5.647
12.170436	5.631
12.251056	5.888
12.30295	5.675
12.333435	5.589
12.274589	5.391
12.230794	5.438
12.228573	5.506
12.348948	5.785
12.337518	5.459
12.261777	5.405
12.303617	5.294
12.272433	5.182
12.32933	5.078
12.359127	5.457
12.297697	5.549
12.257353	5.506
12.199473	5.372
12.06816	5.478
12.062734	5.372
12.005368	5.508
12.187702	5.251
12.290691	5.312
12.118668	5.298
12.157628	5.292
12.166868	5.322
12.179798	5.396
12.195232	5.419
12.265263	5.318
11.973162	5.332
12.224358	5.475
12.176527	5.282
12.108611	5.077
12.138258	5.314
12.108927	5.533
12.083602	5.601
12.2059	5.871
12.28019	5.347
12.404467	5.308
12.163005	5.308
12.300554	5.24
12.305885	5.235
12.225643	5.258
12.281578	5.376
12.217986	5.452
12.317553	5.53
12.351815	5.413
12.445296	5.568
12.290983	5.715
12.149315	5.473
12.153734	5.568
12.126141	5.625
12.115535	5.468
11.997655	5.723
11.956121	5.657
12.022065	5.59
12.16134	5.457
12.152246	5.453
12.276262	5.649
12.306411	5.544
12.327834	5.654
12.11523	5.662
12.185287	5.68
12.128631	5.603
12.139369	5.589
12.198669	5.568
12.202302	5.731
12.080478	5.619
12.214833	5.607
12.218617	5.543
12.187415	5.51
12.155725	5.519
12.130103	5.415
12.10223	5.442
12.037637	5.424
12.132793	5.413
12.109149	5.633
12.300898	5.603
12.255914	5.566
12.156663	5.489
12.074352	5.6
12.234528	5.402
12.12711	5.581
12.178279	5.421
12.18271	5.553
12.095485	5.413
12.051394	5.384
12.061295	5.491
11.987902	5.838
12.009821	5.579
12.146484	5.547
12.174651	5.413
12.152578	5.491
12.208308	5.496
12.13442	5.462
12.106895	5.478
12.124216	5.525
12.145815	5.376
12.239404	5.298
12.150304	5.22
12.210204	5.274
12.229375	5.27
12.171521	5.073
12.221585	5.067
12.068632	5.285
12.178189	5.352
12.202311	5.374
12.191191	5.253
12.152628	5.31
12.085019	5.258
12.151719	5.296
12.191653	5.325
12.264434	5.145
12.296345	5.157
12.160534	5.038
12.229785	4.786
12.260931	4.864
12.312846	5.018
12.300259	4.951
12.118299	4.895
12.183986	4.907
12.199594	4.909
12.197581	4.946
12.370275	4.883
12.224577	5.127
12.330028	5.23
12.293371	5.172
12.308514	5.129
12.248006	5.039
12.25856	4.946
12.343761	4.96
12.273162	5.182
12.276317	5.131
12.248885	5.287
12.082951	5.215
12.273865	5.067
12.309796	4.951
12.395208	5.205
12.243024	5.277
12.32953	4.903
12.104069	4.912
12.028956	4.928
12.117403	4.937
12.205167	4.98
12.082384	5.113
12.231103	5.171
12.345781	5.245
12.384603	5.304
12.341428	5.17
12.246622	5.197
12.253078	5.265
12.339413	5.518
12.2982	5.624
12.255296	5.387
12.122018	5.588
12.213687	5.58
12.162008	5.498
12.041905	5.45
12.07558	5.589
12.113807	5.432
12.277086	5.533
12.221092	5.553
12.265821	5.553
12.204139	5.518
12.310898	5.366
12.264819	5.365
12.247822	5.435
12.269769	5.451
12.188245	5.248
12.237572	5.301
12.234209	5.157
12.265629	5.527
12.297203	5.405
12.374922	5.295
12.357953	5.389
12.199431	5.529
12.100625	5.652
11.994894	5.652
12.102331	5.572
12.164469	5.592
12.198143	5.567
12.235842	5.294
12.253339	5.566
12.266422	5.449
12.296222	5.556
12.334637	5.784
12.242783	5.769
12.123335	5.656
12.230636	5.629
12.364492	5.767
12.311791	5.778
12.377835	5.694
12.247704	5.704
12.214824	5.603
12.285693	5.659
12.200043	5.76
12.259259	5.682
12.248284	5.62
12.203146	5.62
12.287387	5.402
12.186024	5.542
12.203452	5.552
12.28729	5.341
12.290779	5.3
12.297406	5.446
12.222826	5.359
12.286124	5.425
12.335969	5.262
12.319751	5.459
12.245361	5.513
12.272231	5.445
12.332496	5.443
12.371857	5.311
12.365184	5.237
12.38483	5.393
12.297016	5.345
12.375001	5.433
12.320566	5.601
12.271565	5.479
12.247326	5.546
12.247007	5.746
12.323509	5.798
12.311535	5.58
12.302245	5.552
12.243909	5.523
12.163899	5.637
12.229777	5.731
12.314512	5.627
12.324728	5.659
12.275025	5.846
12.335603	5.954
12.33628	5.773
12.355847	5.642
12.328732	5.63
12.193561	5.759
12.299569	5.779
12.211108	5.643
12.257585	5.609
12.216929	5.641
12.300435	5.764
12.312802	5.703
12.32657	5.669
12.215459	5.689
12.160849	5.872
12.239556	5.729
12.190607	5.732
12.164582	5.773
12.27748	5.681
12.226461	5.782
12.231698	5.95
12.24704	5.854
12.274822	6.002
12.36791	5.869
12.307918	5.94
12.331833	5.697
12.237362	5.827
12.132316	5.713
12.185807	5.549
12.207793	5.574
12.307273	5.608
12.336879	5.547
12.290891	5.565
12.195481	5.759
12.267479	5.573
11.330466	5.73
11.32767	5.504
11.361816	5.367
11.377818	5.551
11.407171	5.385
11.394427	5.374
11.450542	5.382
11.35953	5.318
11.462662	5.067
11.441612	5.011
11.334818	5.06
11.394909	5.019
11.287395	5.076
11.293473	5.025
11.349083	5.032
11.40535	4.885
11.406178	4.832
11.433041	4.593
11.478549	5.004
11.461007	4.842
11.348223	4.838
11.384845	4.84
11.266851	5.422
11.246872	5.185
11.215383	5.088
11.178205	4.987
11.307889	4.976
11.276185	4.659
11.254773	5.137
11.326557	4.909
11.376735	4.795
11.378402	5.024
11.351115	5.029
11.376307	4.907
11.36552	4.941
11.380183	4.904
11.335354	4.928
11.367751	4.976
11.264232	4.944
11.408261	4.873
11.341632	4.861
11.34173	4.878
11.473891	5.009
11.348716	4.997
11.354226	4.958
11.363061	5.078
11.34013	5.084
11.26344	4.93
11.329908	5.076
11.399452	4.914
11.367634	4.761
11.335072	4.725
11.346711	4.778
11.386385	4.858
11.382001	4.723
11.383061	4.811
11.326797	4.863
11.332789	4.885
11.381738	4.933
11.367687	4.843
11.336793	4.782
11.312145	4.95
11.386877	4.937
11.466481	4.846
11.438545	5.007
11.446392	4.919
11.462835	4.842
11.353546	4.87
11.38459	4.964
11.464354	5.081
11.500088	4.961
11.478508	4.851
11.537302	4.831
11.53745	4.747
11.561532	4.532
11.490677	4.725
11.527458	4.753
11.560179	4.812
11.431248	4.811
11.57904	4.865
11.382722	4.747
11.433432	4.98
11.317151	4.882
11.268374	5.077
11.241865	4.701
11.132843	4.974
11.381185	4.82
11.323867	4.854
11.360056	4.799
11.185725	4.888
11.203788	4.683
11.247956	4.927
11.40322	4.671
11.337331	4.511
11.363555	4.688
11.43211	4.651
11.430766	4.575
11.338354	4.631
11.334062	4.813
11.321435	4.739
11.387981	4.754
11.391558	4.711
11.425871	4.914
11.565321	4.462
11.42431	4.593
11.388554	4.671
11.433109	4.398
11.310802	4.398
11.365369	4.598
11.337513	4.449
11.357145	4.542
11.358193	4.624
11.342112	4.556
11.318849	4.46
11.305013	4.467
11.166251	4.342
11.280704	4.582
11.329369	4.447
11.345224	4.503
11.267837	4.513
11.383034	4.275
11.358339	4.456
11.37877	4.292
11.410411	4.482
11.456874	4.493
11.38422	4.566
11.364465	4.371
11.126793	4.306
11.315104	4.383
11.298937	4.276
11.425333	4.564
11.352697	4.599
11.448035	4.49
11.365841	4.281
11.382874	4.438
11.393726	4.567
11.348613	4.536
11.275031	4.596
11.353238	4.621
11.260123	4.82
11.318218	4.486
11.348302	4.637
11.375225	4.537
11.365137	4.493
11.306546	4.442
11.3479	4.317
11.318082	4.437
11.418724	4.285
11.448563	4.323
11.490706	4.564
11.549229	4.492
11.456818	4.482
11.393522	4.366
11.379103	4.627
11.351913	4.697
11.311994	4.849
11.37641	4.655
11.406631	4.652
11.330729	4.558
11.302488	4.646
11.332888	4.714
11.332742	4.687
11.244367	5.17
11.390307	4.791
11.37805	4.797
11.346294	4.628
11.408984	4.614
11.386175	4.507
11.347413	4.543
11.24832	4.622
11.364276	4.675
11.430985	4.65
11.408055	4.511
11.458535	4.587
11.465038	4.588
11.364441	4.666
11.368968	4.584
11.420132	4.54
11.491351	4.378
11.416558	4.552
11.456287	4.609
11.381064	4.795
11.379393	4.957
11.404605	5.04
11.402662	4.962
11.454174	4.895
11.492519	4.976
11.421687	4.771
11.382843	4.684
11.301229	4.768
11.321583	4.883
11.357108	4.91
11.403593	4.525
11.482814	4.501
11.380505	4.715
11.412664	4.711
11.488657	4.71
11.502039	4.639
11.374596	4.703
11.358936	4.833
11.444945	4.933
11.422013	4.884
11.504143	4.803
11.385181	4.754
11.644003	4.647
11.459651	4.665
11.543944	4.739
11.358401	4.572
11.499425	4.802
11.544709	4.787
11.580928	4.637
11.425013	4.792
11.41214	4.66
11.294189	4.58
11.44273	4.588
11.470696	4.546
11.494692	4.709
11.450159	4.724
11.44404	4.6
11.361881	4.814
11.305298	4.662
11.314803	4.772
11.362728	4.899
11.377948	4.871
11.271655	4.971
11.307859	4.739
11.473591	4.602
11.487171	4.798
11.482908	4.743
11.402555	4.693
11.45234	4.975
11.434001	4.965
11.323749	4.671
11.398672	4.638
11.390204	4.879
11.399382	4.652
11.35851	4.929
11.304117	4.81
11.322791	4.432
11.341397	4.618
11.319504	4.431
11.395494	4.318
11.402385	4.584
11.465322	4.322
11.406372	4.323
11.411906	4.595
11.368664	4.54
11.386309	4.531
11.299199	4.624
11.366783	4.457
11.421695	4.616
11.385919	4.557
11.458888	4.472
11.476245	4.772
11.459839	4.576
11.440643	4.675
11.37954	4.633
11.407601	4.685
11.247243	4.828
11.285276	4.893
11.363815	4.603
11.31227	4.682
11.301222	4.792
11.30976	4.668
11.336217	4.778
11.412444	4.791
11.42888	4.669
11.371561	4.687
11.491797	4.532
11.457675	4.531
11.46613	4.529
11.352755	4.496
11.362527	4.487
11.491504	4.637
11.600581	4.599
11.57091	4.663
11.565417	4.751
11.571858	4.601
11.506882	4.74
11.490531	4.724
11.542441	4.657
11.531946	4.667
11.50929	4.522
11.436698	4.338
11.413941	4.194
11.361571	4.35
11.355248	4.215
11.353733	4.139
11.391002	4.198
11.32409	4.456
11.24664	4.616
11.403824	4.499
11.312353	4.548
11.306879	4.424
11.311281	4.556
11.273297	4.57
11.330474	4.682
11.317829	4.353
11.262852	4.337
11.337667	4.492
10.815521	4.308
10.786437	4.425
10.852978	4.353
10.839717	4.293
10.899225	4.336
10.783341	4.523
10.841764	4.463
10.757588	4.733
10.757825	4.556
10.850212	4.55
10.909495	4.44
10.874095	4.605
10.833422	4.222
10.871042	4.16
10.912288	4.057
10.848154	4.013
10.791106	4.019
10.853275	3.984
10.873802	3.823
10.827606	4.163
10.856329	4.014
10.832176	3.827
10.834716	3.774
10.916759	3.808
10.838689	4.106
10.853054	4.063
10.796133	4.284
10.87171	4.269
10.867446	4.096
10.799415	4
10.980174	3.819
10.890478	3.926
10.889487	4.003
10.862127	3.824
10.807089	4.061
10.833809	3.913
10.790889	3.87
10.870643	4.074
10.774527	4.149
10.846667	4.136
10.791286	3.893
10.855466	3.87
10.875548	4.108
10.860866	3.987
10.805587	3.95
10.851229	4.077
10.89029	4.034
10.890166	3.881
10.830489	4.054
10.805292	4.077
10.872749	4.1
10.905017	4.004
10.918177	4.06
10.862668	3.914
10.85114	3.993
10.877295	4.036
10.861344	3.881
10.831171	3.852
10.838356	3.977
10.909719	3.934
10.83837	3.733
10.864718	3.926
10.704847	4.091
10.863211	3.998
10.858504	4.074
10.907444	3.973
10.779629	3.837
10.828937	3.89
10.88403	3.957
10.837526	4.055
10.857223	4.05
10.783563	3.919
10.769233	3.877
10.801878	3.754
10.799129	3.777
10.873051	3.75
10.831319	3.899
10.876052	3.796
10.948582	3.85
10.946786	3.848
10.928022	3.969
10.93579	3.66
10.980315	3.679
10.89256	3.872
10.837643	3.81
10.913568	3.842
10.840824	3.871
10.820994	3.717
10.87895	3.651
10.904462	4.347
10.802522	3.638
10.891083	3.777
10.816387	3.768
10.73245	3.892
10.830923	3.823
10.8481	3.731
10.76254	3.778
10.896407	3.581
10.816656	3.846
10.77692	4.002
10.820382	3.87
10.765011	3.972
10.795828	4.123
10.780535	3.874
10.721818	3.754
10.773434	4.03
10.771095	3.937
10.751486	3.917
10.773379	4.015
10.82462	3.97
10.811939	4.1
10.795956	4.052
10.810878	4.218
10.788584	4.425
10.849462	4.168
10.85272	4.135
10.834091	4.192
10.831236	4.265
10.85915	4.18
10.801144	4.149
10.829173	4.184
10.894105	4.242
10.905781	4.32
10.860122	4.295
10.752928	4.298
10.840998	4.161
10.895696	4.198
10.898818	4.151
10.891872	4.114
10.877349	4.205
10.760754	3.998
10.81001	3.909
10.783395	3.862
10.870947	3.901
10.839598	3.755
10.812831	4.041
10.826672	3.951
10.903864	4.137
10.91159	4.386
10.756368	4.363
10.832109	4.455
10.898913	4.303
10.859585	4.342
10.873876	4.284
10.858797	4.139
10.897045	4.168
10.874296	4.115
10.869694	4.313
10.917759	3.98
10.783985	4.182
10.91277	4.074
10.927249	4.081
10.810398	4.053
10.815866	4.193
10.811554	4.001
10.772031	3.914
10.806628	3.842
10.773749	4.048
10.836773	3.896
10.818054	3.917
10.851332	4.118
10.902768	4.012
10.893771	3.947
10.938537	3.986
10.984396	3.982
10.983046	4.198
10.890614	4.19
10.825232	4.024
10.835425	4.105
10.833957	4.013
10.861473	4.042
10.838314	3.987
10.855899	3.766
10.919681	3.822
10.861997	3.896
10.889799	3.769
10.811645	3.998
10.844022	3.757
10.756234	3.719
10.853716	3.715
10.858412	3.796
10.858275	3.652
10.897853	3.759
10.862046	3.793
10.837261	3.843
11.044711	3.74
10.995489	3.754
10.922972	3.953
10.907936	4.072
10.860099	3.941
10.90754	3.929
10.821056	4.098
10.789559	4.128
10.902317	4.167
10.811974	3.882
10.840348	4.061
10.80613	3.908
10.828554	3.897
10.788945	3.899
10.845489	3.917
10.888697	3.973
10.784396	3.783
10.770791	3.887
10.751768	3.931
10.78986	3.617
10.846265	3.72
10.862578	3.555
10.883528	3.738
10.902559	3.535
10.849872	3.692
10.941969	3.44
10.909113	3.551
10.964074	3.736
11.004158	3.794
10.924947	3.571
10.798168	3.814
10.960675	3.587
10.859543	3.53
10.79802	3.801
10.901918	3.939
10.794292	4.039
10.843026	4.15
10.829918	4.037
10.882482	4.03
10.884656	4.116
10.900616	4.168
10.969513	3.884
11.002709	3.912
10.877132	3.957
10.777264	3.98
10.926498	3.962
10.858369	3.549
10.838719	3.842
10.851368	3.624
10.843928	4.216
10.893234	3.816
10.800074	3.799
10.858162	3.909
10.908375	4.479
10.893065	3.604
10.923694	4.521
10.977477	3.662
10.903897	3.731
10.981397	3.686
10.890841	3.702
10.866793	3.691
10.842115	3.696
10.89966	3.892
10.884281	3.656
10.935132	3.817
10.884329	3.763
10.95532	3.749
10.89388	3.852
10.945938	3.959
10.926322	3.937
10.924858	3.947
10.937595	4.096
10.855065	4.189
10.836417	4.315
10.872414	4.389
10.94108	4.282
10.837044	4.165
10.947698	4.397
10.984558	4.208
10.96593	4.173
10.942767	3.891
10.87719	4.068
10.941636	3.913
10.880859	3.777
10.867193	3.89
10.815915	4.088
10.849525	3.936
10.874209	3.945
10.947239	4.022
10.961069	3.898
10.93265	3.921
10.828252	3.665
10.91353	3.63
10.968447	3.592
10.828659	3.762
10.927249	3.729
10.87361	3.931
10.797693	3.939
10.813132	4.188
10.784792	4.105
10.715279	4.254
10.821279	3.782
10.890169	3.568
10.781694	3.627
10.85183	3.509
10.782866	3.75
10.782366	3.69
10.859195	3.582
10.913732	3.528
10.92199	3.476
10.810404	3.353
10.774918	3.539
10.914405	3.626
10.81643	3.435
10.882719	3.367
10.34069	3.649
10.34069	3.692
10.392847	3.604
10.345026	3.66
10.401282	3.598
10.394542	3.557
10.409012	3.667
10.404871	3.643
10.446203	4.266
10.366153	3.58
10.383918	3.58
10.415075	3.503
10.313724	3.282
10.315568	3.418
10.305895	3.159
10.451742	3.279
10.465108	3.497
10.379078	3.496
10.427219	4.104
10.378242	3.11
10.384858	3.208
10.410927	3.214
10.471193	3.45
10.427276	3.037
10.433315	3.45
10.332394	3.349
10.393133	3.28
10.383862	3.277
10.355717	3.393
10.300901	3.243
10.399904	3.004
10.451871	2.743
10.470007	2.83
10.415712	3.033
10.37487	2.917
10.533321	2.815
10.468037	2.971
10.461996	2.84
10.474588	2.528
10.559112	3.632
10.590423	2.513
10.523105	2.43
10.501843	2.351
10.460823	2.341
10.604005	1.996
10.457102	2.031
10.524155	2.148
10.534127	2.152
10.527455	2.199
10.521822	2.214
10.593238	2.5
10.442707	2.554
10.510694	2.445
10.433881	2.27
10.495164	2.406
10.406664	2.07
10.540346	2.58
10.542168	2.31
10.458676	2.587
10.426265	2.51
10.522217	2.134
10.489652	2.548
10.371506	2.382
10.390553	2.413
10.494463	2.502
10.455097	2.15
10.391291	2.508
10.350965	2.693
10.293929	2.377
10.275089	2.271
10.380627	2.528
10.543722	2.226
10.545409	2.072
10.532991	2.053
10.453759	2.037
10.484182	1.912
10.511696	2.132
10.47995	2.337
10.483096	2.291
10.608523	2.23
10.638664	3.833
10.587139	2.412
10.587826	2.199
10.570727	2.394
10.580754	2.457
10.635422	2.107
10.588336	2.137
10.588119	2.148
10.68506	2.108
10.584953	2.174
10.538679	2.294
10.533305	2.13
10.643821	1.825
10.671649	1.947
10.666374	1.759
10.585189	1.974
10.578785	1.957
10.547973	2.065
10.612991	2.043
10.555217	1.878
10.595616	1.79
10.613071	2.238
10.621353	2.119
10.656056	2.341
10.732092	2.796
10.576833	2.214
10.515517	2.681
10.619229	2.052
10.587497	1.763
10.523344	2.227
10.456687	1.955
10.573926	2.185
10.623426	2.332
10.547359	2.276
10.590156	2.344
10.652674	2.205
10.592446	2.676
10.509305	2.101
10.542905	2.236
10.600542	2.534
10.614724	2.618
10.587638	2.631
10.609237	2.757
10.588177	2.735
10.512957	2.845
10.534593	2.761
10.548981	2.808
10.490382	2.767
10.495414	2.579
10.509676	2.432
10.511771	2.382
10.554306	2.512
10.534561	2.472
10.548084	2.403
10.406239	2.633
10.466654	2.538
10.468967	2.631
10.590696	2.664
10.620288	2.687
10.607999	2.656
10.630156	2.571
10.632466	2.339
10.59266	2.568
10.569856	2.133
10.718558	2.5
10.647209	2.414
10.612795	2.566
10.678093	2.747
10.65071	2.521
10.659459	2.603
10.697488	2.755
10.632758	3.07
10.592019	3.03
10.615236	2.99
10.669765	3.02
10.648477	3.135
10.674931	2.997
10.571348	2.906
10.641921	2.836
10.668991	2.884
10.659413	2.818
10.612135	2.464
10.557876	2.606
10.558391	2.4
10.636443	2.423
10.600803	2.223
10.586156	1.999
10.637122	1.607
10.591605	1.537
10.638653	1.749
10.668133	1.731
10.684781	1.872
10.651702	2.207
10.667093	1.934
10.723898	1.784
10.775546	1.742
10.689312	1.448
10.672941	1.67
10.591267	1.83
10.536006	1.734
10.647563	1.626
10.653535	1.585
10.655706	2.023
10.667605	1.624
10.597464	1.859
10.606495	1.812
10.571197	1.634
10.630228	1.619
10.642454	1.596
10.698238	1.854
10.704199	2.303
10.745121	2.402
10.672719	2.038
10.703016	2.271
10.642182	2.171
10.65164	2.377
10.543668	2.229
10.664653	1.954
10.699363	1.948
10.661826	2.121
10.633624	1.443
10.633066	1.599
10.598234	1.683
10.612981	1.798
10.716716	1.861
10.711618	1.982
10.654277	2.073
10.691577	2.003
10.739609	1.999
10.736515	1.856
10.632473	1.97
10.655055	2.103
10.719952	2.132
10.638257	2.011
10.647316	2.21
10.588131	2.465
10.633569	3.73
10.588876	2.401
10.562937	4.049
10.609263	2.632
10.570071	2.355
10.62769	3.973
10.631208	2.403
10.673396	2.505
10.607997	2.826
10.601076	2.511
10.597463	2.81
10.610419	2.719
10.630253	2.561
10.629934	2.11
10.690844	2.015
10.665907	2.301
10.688916	2.166
10.596773	2.379
10.653922	2.603
10.733846	2.534
10.666291	2.399
10.689341	2.146
10.585993	1.847
10.671288	1.824
10.654751	1.594
10.698917	1.984
10.654035	1.697
10.631634	1.842
10.601712	1.693
10.541622	1.763
10.579414	1.788
10.668698	1.453
10.580576	1.715
10.545034	1.977
10.60379	1.996
10.551721	1.738
10.656148	1.946
10.708296	2.11
10.670149	1.903
10.674014	2.143
10.670467	3.683
10.660979	3.922
10.765055	2.023
10.708716	4.452
10.698307	4.315
10.676796	1.872
10.700948	2.155
10.661817	1.736
10.708595	1.824
10.732512	1.72
10.683315	1.864
10.687366	1.426
10.690681	1.603
10.740844	1.585
10.748943	1.731
10.718578	1.68
10.728997	1.589
10.746954	1.502
10.769295	1.515
10.819069	1.683
10.793727	1.458
10.767292	1.201
10.744683	1.478
10.731024	1.274
10.656768	1.366
10.652954	1.67
10.615891	1.827
10.700399	1.961
10.600275	1.952
10.70468	1.645
10.762083	1.778
10.744445	1.584
10.678741	1.494
10.643041	1.273
10.541903	1.399
10.533183	1.466
10.652141	1.592
10.629561	1.401
10.651999	1.388
10.672837	1.538
10.711038	1.521
10.722575	1.622
10.744149	1.588
10.699825	
10.735077	
9.625242	
9.622412	
9.704811	
9.628693	
9.643384	
9.60815	
9.648414	
9.640201	
9.667151	
9.648772	
9.646164	
9.623279	
9.657064	
9.62352	
9.620522	
9.637644	
9.653417	
9.49954	
9.50508	
9.610877	
9.566751	
9.589503	
9.584773	
9.549962	
9.476886	
9.509971	
9.553231	
9.51649	
9.623916	
9.632325	
9.573247	
9.591568	
9.573167	
9.510832	
9.580871	
9.481123	
9.610566	
9.659654	
9.463069	
9.631744	
9.640663	
9.626211	
9.693296	
9.690789	
9.653425	
9.597303	
9.669501	
9.557287	
9.592179	
9.595641	
9.616134	
9.57184	
9.590539	
9.612088	
9.636024	
9.579216	
9.66793	
9.651103	
9.655325	
9.650754	
9.642459	
9.651996	
9.690008	
9.659822	
9.682021	
9.746265	
9.583522	
9.518769	
9.647398	
9.698859	
9.739867	
9.728525	
9.659479	
9.752707	
9.649973	
9.708176	
9.683419	
9.690309	
9.610237	
9.66353	
9.668826	
9.661995	
9.649946	
9.69773	
9.64449	
9.651437	
9.705054	
9.675136	
9.732789	
9.780873	
9.661526	
9.783111	
9.680132	
9.748251	
9.616467	
9.663764	
9.608123	
9.61963	
9.621191	
9.597769	
9.638258	
9.703311	
9.647177	
9.676931	
9.610857	
9.700105	
9.661839	
9.671488	
9.691107	
9.766002	
9.665747	
9.703656	
9.775168	
9.669922	
9.72649	
9.709056	
9.755197	
9.752811	
9.797723	
9.712309	
9.729883	
9.672672	
9.705867	
9.782941	
9.74795	
9.72666	
9.765519	
9.720137	
9.751783	
9.654214	
9.713982	
9.72662	
9.702262	
9.701468	
9.601999	
9.646625	
9.640091	
9.68957	
9.680696	
9.703421	
9.737497	
9.746532	
9.83814	
9.742173	
9.68589	
9.71581	
9.786764	
9.814344	
9.733344	
9.811425	
9.843785	
9.848751	
9.843211	
9.770203	
9.755067	
9.737661	
9.789812	
9.799681	
9.646671	
9.633459	
9.773213	
9.774104	
9.694186	
9.742321	
9.715544	
9.742141	
9.709711	
9.73233	
9.807016	
9.889118	
9.7593	
9.694398	
9.708777	
9.743089	
9.736592	
9.756145	
9.827299	
9.808935	
9.830108	
9.761987	
9.744192	
9.762013	
9.723314	
9.66736	
9.652835	
9.686763	
9.788977	
9.765513	
9.79113	
9.788066	
9.657522	
9.731456	
9.695641	
9.731253	
9.739053	
9.71628	
9.699278	
9.734895	
9.691185	
9.734792	
9.799223	
9.814109	
9.748752	
9.792271	
9.801911	
9.725004	
9.77229	
9.769365	
9.845128	
9.756464	
9.786717	
9.884035	
9.865968	
9.743485	
9.803004	
9.767708	
9.725065	
9.83897	
9.821298	
9.802834	
9.786917	
9.798007	
9.775368	
9.77308	
9.808048	
9.737586	
9.769567	
9.749152	
9.772545	
9.801864	
9.805833	
9.920819	
9.808009	
9.814008	
9.847437	
9.805265	
9.811501	
9.831329	
9.81646	
9.788138	
9.862302	
9.896388	
9.913156	
9.8615	
9.899397	
9.834607	
9.860011	
9.853874	
9.869341	
9.859517	
9.810156	
9.872858	
9.858618	
9.923876	
9.935199	
9.919005	
9.857	
9.732385	
9.853146	
9.87825	
9.894685	
9.829533	
9.861537	
9.833183	
9.830699	
9.816042	
9.800905	
9.741003	
9.753336	
9.898852	
9.804924	
9.877895	
9.864523	
9.810166	
9.810035	
9.86598	
9.863661	
9.891859	
9.882643	
9.973754	
9.825206	
9.881602	
9.876613	
9.866033	
9.863378	
9.836738	
9.84905	
9.862453	
9.879899	
9.878352	
9.851239	
9.876063	
9.943266	
9.999848	
9.932294	
9.983692	
9.927063	
9.9175	
9.81402	
9.903712	
9.077165	
9.099063	
9.183217	
9.072755	
9.034149	
9.043928	
9.018841	
9.045604	
9.133784	
9.047565	
9.001643	
9.080599	
9.142741	
9.113777	
9.072458	
9.077863	
9.126285	
9.14623	
9.122751	
9.053884	
9.096588	
9.162238	
9.055839	
9.05996	
9.094229	
9.0581	
9.081877	
9.107769	
9.090074	
9.104471	
9.034224	
9.100964	
9.012392	
9.083544	
9.126461	
9.156242	
9.082973	
9.024098	
9.115075	
9.007334	
9.015002	
9.027634	
9.173776	
9.096359	
9.108249	
9.131862	
9.061634	
9.120668	
9.13477	
9.142502	
9.025236	
9.012352	
9.064462	
9.043549	
9.081376	
9.110153	
9.147224	
9.124991	
9.033222	
9.083164	
9.088405	
8.988067	
9.057466	
9.036076	
9.023186	
9.026651	
9.139629	
9.101413	
9.093274	
9.073686	
9.071874	
9.068611	
9.144973	
9.061011	
9.040471	
9.135124	
9.184896	
9.162443	
9.183374	
9.118524	
9.121637	
9.105624	
9.16598	
9.110858	
9.146412	
9.108425	
9.200126	
9.074418	
9.128935	
9.1502	
9.200032	
9.129797	
9.154199	
9.185034	
9.15168	
9.160019	
9.119621	
9.257911	
9.203555	
9.150872	
9.180226	
9.104989	
9.105948	
9.162015	
9.141794	
9.147988	
9.247853	
9.217153	
9.223071	
9.152767	
9.15166	
9.201674	
9.134676	
9.194209	
9.177908	
9.167268	
9.151265	
9.158896	
9.243202	
9.188099	
9.110545	
9.087826	
9.066462	
9.118875	
9.18355	
9.216438	
9.227678	
9.167844	
9.214532	
9.236536	
9.244019	
9.226339	
9.208553	
9.25244	
9.238647	
9.209187	
9.210144	
9.240346	
9.160263	
9.231668	
9.138174	
9.201335	
9.223321	
9.229561	
9.203957	
9.205258	
9.240256	
9.217741	
9.278302	
9.210626	
9.256952	
9.21986	
9.172696	
9.193128	
9.190881	
9.248664	
9.197475	
9.111945	
9.119165	
9.061168	
9.171362	
9.192259	
9.144126	
9.115808	
9.194404	
9.169123	
9.178579	
9.201679	
9.167955	
9.191741	
9.231886	
9.173102	
9.181019	
9.280002	
9.178193	
9.267948	
9.194655	
9.174611	
9.169988	
9.194068	
9.241371	
9.261096	
9.299621	
9.275946	
9.270927	
9.261936	
9.177706	
9.178217	
9.142223	
9.156223	
9.156618	
9.224598	
9.145492	
9.164219	
9.236575	
9.179897	
9.225461	
9.193425	
9.236618	
9.214889	
9.294806	
9.246879	
9.212863	
9.183906	
9.179587	
9.121349	
9.1528	
9.137032	
9.114495	
9.255757	
9.158029	
9.197109	
9.20651	
9.23403	
9.198382	
9.287394	
9.211054	
9.189912	
9.189435	
9.216093	
9.234425	
9.246538	
9.226662	
9.235276	
9.211597	
9.272246	
9.195573	
9.243561	
9.148063	
9.215055	
9.271022	
9.288494	
9.339717	
9.327173	
9.337422	
9.264266	
9.282599	
9.334484	
9.342202	
9.341145	
9.337313	
9.395841	
9.368078	
9.323581	
9.310922	
9.322837	
9.322886	
9.222172	
9.208474	
9.306316	
9.407603	
9.302782	
9.319809	
9.307799	
9.306819	
9.283429	
9.29006	
9.319784	
9.278912	
9.356247	
9.258068	
9.301211	
9.223609	
9.274391	
9.181124	
9.277418	
9.274294	
9.268259	
9.355678	
9.243398	
9.305371	
9.287164	
9.298144	
9.26828	
9.320478	
9.278975	
9.278599	
9.217773	
9.226298	
9.26198	
9.294988	
9.329146	
9.306529	
9.249321	
9.273888	
9.331746	
9.297736	
9.273998	
9.218636	
9.321843	
9.231422	
9.298299	
9.333372	
9.227402	
9.211789	
9.277191	
9.294775	
9.304895	
9.258841	
9.308732	
8.400989	
8.310941	
8.310878	
8.314821	
8.275941	
8.265842	
8.305474	
8.318565	
8.293285	
8.285067	
8.311286	
8.268767	
8.267183	
8.262522	
8.23804	
8.252155	
8.28124	
8.340722	
8.220678	
8.266823	
8.254751	
8.36522	
8.288582	
8.289685	
8.282055	
8.300984	
8.253381	
8.279085	
8.33579	
8.245418	
8.278055	
8.212552	
8.314319	
8.420049	
8.359638	
8.292105	
8.332967	
8.321344	
8.116027	
8.156523	
8.162522	
8.139148	
8.29703	
8.335185	
8.270432	
8.207174	
8.243372	
8.248695	
8.388683	
8.260605	
8.258267	
8.301301	
8.281356	
8.217657	
8.280297	
8.334068	
8.212755	
8.26259	
8.357422	
8.208463	
8.307094	
8.257055	
8.169345	
8.234308	
8.184976	
8.287005	
8.199235	
8.303015	
8.235545	
8.300429	
8.299472	
8.260237	
8.285747	
8.250716	
8.252075	
8.295942	
8.314483	
8.223673	
8.258889	
8.237698	
8.238662	
8.270862	
8.162466	
8.201336	
8.209734	
8.388966	
8.200677	
8.179776	
8.266391	
8.321084	
8.322261	
8.33048	
8.248912	
8.255802	
8.316927	
8.293638	
8.302366	
8.199769	
8.137784	
8.203809	
8.157174	
8.136782	
8.253584	
8.288236	
8.399903	
8.294138	
8.327686	
8.168106	
8.254265	
8.211366	
8.235219	
8.28521	
8.197547	
8.223732	
8.206894	
8.235409	
8.246389	
8.250277	
8.34023	
8.304984	
8.297582	
8.240604	
8.322671	
8.2111	
8.260026	
8.231206	
8.322341	
8.351301	
8.285802	
8.358934	
8.333098	
8.373592	
8.278723	
8.366976	
8.263179	
8.313371	
8.266329	
8.22683	
8.28744	
8.266426	
8.283853	
8.330954	
8.326032	
8.242287	
8.285262	
8.310056	
8.308256	
8.425698	
8.288976	
8.225283	
8.283808	
8.243695	
8.243267	
8.286572	
8.309401	
8.297182	
8.347555	
8.310176	
8.367721	
8.312103	
8.263301	
8.311617	
8.365005	
8.287866	
8.319342	
8.332657	
8.303254	
8.259283	
8.240401	
8.290172	
8.324702	
8.254665	
8.25008	
8.268982	
8.290308	
8.228672	
8.217907	
8.265235	
8.360566	
8.356241	
8.33851	
8.230901	
8.335499	
8.303498	
8.292745	
8.239583	
8.323398	
8.299205	
8.302118	
8.288236	
8.261794	
8.274594	
8.281053	
8.321393	
8.327354	
8.301413	
8.288195	
8.307402	
8.289523	
8.25295	
8.311913	
8.301362	
8.299685	
8.349723	
8.324513	
8.203684	
8.198882	
8.201108	
8.243347	
8.230347	
8.296335	
8.207451	
8.226073	
8.22876	
8.211917	
8.22067	
8.208976	
8.186199	
8.172762	
8.139113	
8.218887	
8.248866	
8.330922	
8.285085	
8.233838	
8.144674	
8.203136	
8.179224	
8.118464	
8.084348	
8.25	
8.295985	
8.211368	
8.176624	
8.158903	
8.131396	
8.226253	
8.132866	
8.122771	
8.199998	
8.069019	
8.110477	
8.062499	
8.068205	
7.997986	
8.025955	
7.961774	
7.959229	
8.024943	
8.124864	
8.129038	
8.200191	
8.168438	
8.062732	
8.107546	
8.090875	
8.037471	
8.104722	
8.128619	
8.024909	
7.948004	
8.047711	
8.086918	
8.053471	
8.023019	
8.029602	
8.074048	
8.093558	
7.989011	
8.064531	
7.991398	
8.004887	
7.998207	
8.071982	
8.163853	
8.183979	
8.008286	
8.058317	
8.17086	
8.074985	
8.101126	
7.999857	
7.952991	
7.887295	
8.053794	
8.068369	
8.029595	
8.147987	
8.115073	
8.110669	
8.006839	
8.017525	
8.036302	
8.015053	
8.194459	
8.10015	
8.00773	
8.116524	
8.182712	
8.144885	
8.200158	
7.704218	
7.686324	
7.711769	
7.664879	
7.679948	
7.735239	
7.726435	
7.695755	
7.701006	
7.647623	
7.693019	
7.67668	
7.745238	
7.756378	
7.688002	
7.72387	
7.689393	
7.686146	
7.698363	
7.637914	
7.624099	
7.710072	
7.741278	
7.694798	
7.674511	
7.645949	
7.674325	
7.634083	
7.684101	
7.757545	
7.681652	
7.662721	
7.709449	
7.685698	
7.709634	
7.703357	
7.694943	
7.675005	
7.723855	
7.656216	
7.715234	
7.704692	
7.637741	
7.769679	
7.645909	
7.666359	
7.679842	
7.763372	
7.682331	
7.768698	
7.76837	
7.706369	
7.771307	
7.668361	
7.63799	
7.573897	
7.710386	
7.640757	
7.680957	
7.682252	
7.594225	
7.594576	
7.670456	
7.68209	
7.670483	
7.633756	
7.673291	
7.747059	
7.722911	
7.73062	
7.769341	
7.760093	
7.698156	
7.73754	
7.627899	
7.727344	
7.741941	
7.634835	
7.666359	
7.601137	
7.700173	
7.5886	
7.646673	
7.715923	
7.569617	
7.625607	
7.668761	
7.635308	
7.650888	
7.670839	
7.67552	
7.538678	
7.716367	
7.633597	
7.639103	
7.618401	
7.667966	
7.549334	
7.696063	
7.630978	
7.565699	
7.53287	
7.569376	
7.613181	
7.58504	
7.529825	
7.662553	
7.52006	
7.5607	
7.595837	
7.514049	
7.591399	
7.671195	
7.604842	
7.604048	
7.642382	
7.5578	
7.623734	
7.590569	
7.661503	
7.568545	
7.605499	
7.604164	
7.701485	
7.641848	
7.526866	
7.637503	
7.540826	
7.501198	
7.580242	
7.605755	
7.615827	
7.633295	
7.609519	
7.705167	
7.569765	
7.586664	
7.658111	
7.603836	
7.670214	
7.638003	
7.602147	
7.741198	
7.681952	
7.749866	
7.640965	
7.604371	
7.643239	
7.654931	
7.704345	
7.643452	
7.699624	
7.630497	
7.570456	
7.645711	
7.716571	
7.634725	
7.676579	
7.629142	
7.721052	
7.652461	
7.682154	
7.691876	
7.61968	
7.632322	
7.650418	
7.619493	
7.641279	
7.726158	
7.751777	
7.658643	
7.680634	
7.620773	
7.668816	
7.716524	
7.645187	
7.693827	
7.649089	
7.588773	
7.575746	
7.63398	
7.606636	
7.639417	
7.614157	
7.655238	
7.588436	
7.514703	
7.64358	
7.652247	
7.569774	
7.622104	
7.633906	
7.695385	
7.597311	
7.699628	
7.700193	
7.650469	
7.573148	
7.634974	
7.665163	
7.66568	
7.57708	
7.643808	
7.621199	
7.583159	
7.585342	
7.666916	
7.652335	
7.55017	
7.618342	
7.699028	
7.678204	
7.654393	
7.66444	
7.608213	
7.584612	
7.589505	
7.551758	
7.582555	
7.645421	
7.666409	
7.61005	
7.650458	
7.679347	
7.679121	
7.65823	
7.681265	
7.636419	
7.639685	
7.652458	
7.608884	
7.660593	
7.683041	
7.686536	
7.599244	
7.577131	
7.58777	
7.650903	
7.699812	
7.688815	
7.65628	
7.584719	
7.572464	
7.626483	
7.606318	
7.647001	
7.604332	
7.549076	
7.554749	
7.597926	
7.584579	
7.645732	
7.619173	
7.617117	
7.629475	
7.681905	
7.62809	
7.681332	
7.567748	
7.609795	
7.560967	
7.582604	
7.556408	
7.661133	
7.597106	
7.658699	
7.635265	
7.620501	
7.603884	
7.587721	
7.599416	
7.635532	
7.599074	
7.600584	
7.651257	
7.624176	
7.597201	
7.669449	
7.616019	
7.601632	
7.598279	
7.587563	
7.624333	
7.654556	
7.597187	
7.628749	
7.643792	
7.583097	
7.555177	
7.561083	
7.622104	
7.533107	
7.566719	
7.489465	
7.495266	
7.487872	
7.60456	
7.568405	
7.636894	
7.505319	
7.562413	
	
