# Supplementary material for: The role of scaffold reshaping and disassembly in dynamin driven membrane fission
Source: eLife journal article supplement (doi:10.7554/elife.39441), 2018-12-18
Supplement: supp [file elife-39441-supp-v1.zip › elife_poa_e39441_Figure_2_source_data_4.txt]

#  DATA FILE for Fig. 2f in the paper
#
#      "The role of scaffold reshaping and disassembly
#       in dynamin driven membrane fission"
#
#  by Martina Pannuzzo, Zachary A. McDargh, and Markus Deserno
#
#  published in eLife
#
#  -------------------------------------------------------------
#  Fission driven by CONSTRICTION
#  -------------------------------------------------------------
#  
#  Column 1: R  (scaffold radius, in units of sigma)
#  Column 2: Rg (gyration radius of neck, in units of sigma)
#  
17.807503	10.005
17.807503	10.168
17.718808	10.182
17.64464	10.145
17.589156	10.177
17.579751	10.131
17.818223	10.223
17.768975	10.237
17.565459	10.21
17.384953	10.316
17.507096	10.321
17.58189	10.165
17.669928	10.206
17.638942	10.23
17.630809	10.298
17.720268	10.177
17.441473	10.164
17.286012	10.333
17.28684	10.356
17.347732	10.497
17.376085	10.36
17.456257	10.484
17.580185	10.429
17.584215	10.431
17.671244	10.357
17.765663	10.384
17.686253	10.224
17.605636	10.245
17.687056	10.179
17.43496	10.17
17.410207	10.171
17.61758	10.236
17.686082	10.238
17.729663	10.179
17.825463	10.169
17.813947	10.281
17.921683	10.303
17.89762	10.332
18.047691	10.29
17.937444	10.271
17.911977	10.229
17.964735	10.334
17.900977	10.373
17.929614	10.418
17.8841	10.38
17.844093	10.362
17.645949	10.32
17.546003	10.273
17.603825	10.488
17.632551	10.206
17.81137	10.269
17.845664	10.246
17.815867	10.208
17.855194	10.178
17.832519	10.376
17.637784	10.314
17.716904	10.423
17.71889	10.475
17.526873	10.543
17.568005	10.63
17.548865	10.526
17.472584	10.354
17.622687	10.504
17.618686	10.355
17.626236	10.382
17.733979	10.381
17.778419	10.363
17.754913	10.375
17.691098	10.486
17.726084	10.546
17.775759	10.563
17.614852	10.611
17.740716	10.435
17.48133	10.55
17.439397	10.405
17.610774	10.284
17.631409	10.428
17.596349	10.601
17.525543	10.573
17.556094	10.622
17.574233	10.448
17.633331	10.402
17.553449	10.453
17.498952	10.427
17.495154	10.362
17.598181	10.477
17.427828	10.66
17.66525	10.545
17.62967	10.479
17.762265	10.463
17.730098	10.452
17.789616	10.517
17.827107	10.544
17.804772	10.704
17.778199	10.687
17.547052	10.698
17.493977	10.782
17.606075	10.693
17.526315	10.715
17.740789	10.559
17.771771	10.658
17.788964	10.637
17.609839	10.78
17.728991	10.772
17.626466	10.732
17.530171	10.754
17.621605	10.764
17.479651	10.747
17.601845	10.673
17.792222	10.85
17.790622	10.759
17.849125	10.847
17.779699	10.894
17.716597	10.848
17.682292	10.751
17.807727	10.874
17.529068	10.83
17.366314	10.799
17.255312	10.816
17.084681	10.837
17.354697	10.919
17.567992	10.81
17.611296	10.689
17.599365	10.819
17.533307	10.814
17.427706	10.69
17.390104	10.738
17.535542	10.646
17.499968	10.368
17.56478	10.419
17.65275	10.233
17.553741	10.353
17.586158	10.416
17.689405	10.523
17.533207	10.399
17.645979	10.461
17.59486	10.391
17.677593	10.374
17.622663	10.5
17.657385	10.576
17.697651	10.509
17.905967	10.57
17.862706	10.536
17.785768	10.576
17.706175	10.599
17.746125	10.633
17.811154	10.709
17.789269	10.561
17.875443	10.603
17.750216	10.558
17.860606	10.595
17.512876	10.629
17.63494	10.657
17.608288	10.577
17.521345	10.66
17.643029	10.603
17.604786	10.645
17.485062	10.534
17.624361	10.564
17.836841	10.658
17.816536	10.652
17.699479	10.635
17.723989	10.481
17.690466	10.443
17.47393	10.59
17.524378	10.516
17.554844	10.499
17.757835	10.472
17.59279	10.53
17.580859	10.491
17.749525	10.544
17.742835	10.537
17.397431	10.55
17.671731	10.629
17.372327	10.585
17.643558	10.721
17.829271	10.492
17.722354	10.643
17.79654	10.464
17.802008	10.352
17.834522	10.357
17.641978	10.265
17.825819	10.379
17.790568	10.496
17.746263	10.699
17.739238	10.598
17.702794	10.636
17.69871	10.664
17.496483	10.511
17.291054	10.54
17.448816	10.639
17.507773	10.608
17.552977	10.722
17.816897	10.65
17.844767	10.548
17.73061	10.42
17.609256	10.389
17.269452	10.609
17.400776	10.658
17.370295	10.585
17.590221	10.577
17.413378	10.713
17.343288	10.503
17.39277	10.595
17.463013	10.507
17.240938	10.592
17.376123	10.825
17.172995	10.753
17.526427	10.838
17.392904	10.782
17.533037	10.751
17.461671	10.928
17.304055	10.898
17.517586	10.895
17.549475	10.852
17.504409	10.844
17.685086	10.903
17.348988	10.761
17.461337	10.81
17.476847	10.816
17.479499	10.886
17.427035	10.847
17.364392	10.882
17.474	10.857
17.296339	10.985
17.309199	10.992
17.302021	10.908
17.424527	10.815
17.515962	10.629
17.542137	10.461
17.430994	10.512
17.556887	10.471
17.62976	10.487
17.643013	10.405
17.772523	10.536
17.67148	10.524
17.710927	10.364
17.678364	10.467
17.659519	10.436
17.713788	10.46
17.658992	10.55
17.411913	10.572
17.556844	10.463
17.626227	10.461
17.608052	10.227
17.578137	10.31
17.564808	10.37
17.537401	10.378
17.461155	10.413
17.385697	10.34
17.556206	10.43
17.31706	10.518
17.324994	10.546
17.402715	10.486
17.46597	10.506
17.47651	10.796
17.335924	10.729
17.494994	10.791
17.346118	10.631
17.556386	10.466
17.665848	10.513
17.718539	10.549
17.333176	10.624
17.190759	10.51
17.186966	10.525
17.596089	10.407
17.650013	10.277
17.489477	10.471
17.489178	10.375
17.611251	10.442
17.544827	10.57
17.511343	10.75
17.551731	10.662
17.378806	10.6
17.492976	10.599
17.535877	10.411
17.462964	10.632
17.322601	10.602
17.374856	10.46
17.364127	10.454
17.245067	10.53
17.371747	10.651
17.322941	10.556
17.338057	10.557
17.197354	10.647
17.35663	10.592
17.622584	10.66
17.506365	10.523
17.635411	10.483
17.659662	10.6
17.627125	10.611
17.657732	10.702
17.617208	10.64
17.58861	10.609
17.594633	10.65
17.594814	10.645
17.56023	10.607
17.624403	10.802
17.504425	10.748
17.62557	10.852
17.64089	10.821
17.033365	10.66
16.920523	10.744
16.973479	10.74
16.930204	10.737
16.970615	10.57
17.074271	10.536
16.991613	10.623
16.902989	10.68
16.917618	10.566
16.908726	10.482
17.061882	10.589
16.997396	10.244
16.859091	10.305
16.958654	10.264
17.033837	10.405
16.976458	10.598
17.081292	10.569
17.143615	10.469
16.907734	10.537
16.889983	10.502
17.052545	10.385
17.05616	10.522
17.02753	10.5
16.874397	10.489
16.97652	10.4
17.049488	10.367
17.149056	10.37
17.110968	10.477
17.138858	10.387
16.995332	10.308
16.942321	10.324
16.848828	10.265
16.862223	10.319
16.800633	10.248
16.885611	10.427
16.881448	10.333
16.866288	10.462
16.99842	10.511
16.9574	10.371
17.018149	10.233
17.042635	10.226
17.064389	10.151
16.936575	10.225
17.033712	10.223
17.09627	10.378
17.050505	10.359
17.00632	10.345
16.946561	10.244
16.936417	10.342
16.977512	10.318
16.919404	10.204
16.866325	10.375
17.1228	10.404
17.11655	10.294
17.026369	10.349
17.06837	10.254
17.046766	10.314
16.942328	10.324
16.872176	10.36
16.873185	10.38
16.910757	10.348
16.765394	10.258
16.848282	10.27
16.841881	10.283
16.974682	10.238
17.049262	10.245
16.93778	10.337
17.058401	10.308
16.968791	10.276
17.209603	10.175
17.278637	10.207
17.324768	10.257
17.148592	10.119
16.931057	10.226
16.953182	10.135
16.889207	10.181
16.882783	10.201
16.858135	10.165
16.802798	10.035
16.812881	10.035
16.821462	10.073
16.921779	10.113
16.822541	10.087
16.807366	10.181
16.853964	10.196
16.843808	10.239
16.811917	10.263
17.026648	10.332
17.074601	10.264
17.093941	10.206
16.995797	10.193
17.14684	10.306
17.03131	10.171
17.070959	10.455
17.144075	10.313
17.13089	10.421
16.974665	10.183
17.141056	10.263
17.193696	10.321
17.219343	10.354
17.108556	10.207
17.052955	10.186
17.130444	10.118
17.212767	10.232
17.10157	10.082
17.105697	10.199
17.050977	10.254
16.961571	10.16
16.958227	10.189
16.921098	10.342
16.90822	10.393
16.743306	10.192
16.520078	10.318
16.696649	10.327
16.734428	10.327
16.756908	10.245
16.731458	10.345
16.947712	10.435
16.951928	10.243
16.925653	10.198
16.949462	10.145
17.01472	10.144
16.940153	10.155
16.89466	10.253
16.903976	10.115
16.98621	10.144
17.214692	10.22
17.060848	10.313
17.07991	10.295
17.055203	10.321
17.096121	10.203
17.087637	10.142
16.935826	10.065
16.986851	10.057
16.870469	10.102
16.852693	10.227
16.977412	10.076
16.764467	10.074
16.872614	10.079
16.883063	10.151
17.042435	10.062
16.867307	9.974
16.786341	9.955
16.874781	9.946
16.900826	9.903
16.882029	9.989
17.010021	10.142
17.031992	10.2
16.916572	10.134
16.958151	9.997
17.013881	10.097
16.971578	10.018
17.006385	10.187
16.963527	10.069
16.869469	10.146
16.915127	10.185
16.89145	10.197
17.07431	10.176
17.119	10.152
16.985436	10.157
16.981951	10.083
16.853473	10.006
16.70914	10.027
16.74099	10.188
16.811668	10.175
16.839502	10.129
16.973362	10.189
16.885486	10.219
16.974256	9.892
16.934347	10.02
16.922393	10.051
16.876515	9.876
16.820052	9.886
16.863023	9.883
16.854638	9.986
16.871591	10.113
16.846748	10.205
16.681826	10.178
16.828108	10.109
16.75252	10.172
16.801925	10.141
16.735565	10.082
16.82151	10.097
16.696846	10.059
16.540847	10.272
16.728869	10.373
16.767024	10.243
16.668645	10.241
16.641762	10.306
16.897818	10.306
16.66333	10.334
16.768948	10.254
16.90527	10.197
16.794664	10.377
16.87636	10.292
16.83128	10.32
16.790793	10.335
16.843663	10.381
16.597588	10.308
16.618711	10.247
16.817168	10.312
16.801946	10.31
16.696886	10.332
16.781769	10.134
16.656753	10.164
16.633506	10.294
16.634217	10.335
16.623692	10.442
16.759499	10.52
16.729361	10.465
16.804216	10.398
16.730105	10.399
16.782614	10.49
16.651539	10.377
16.853881	10.334
17.041951	10.339
16.760365	10.356
16.914893	10.36
16.632199	10.408
17.034093	10.362
16.935495	10.389
16.879719	10.346
16.928923	10.284
16.992394	10.256
16.899912	10.327
16.842122	10.354
16.991041	10.435
16.853086	10.437
16.797983	10.488
16.668867	10.583
16.639944	10.528
16.772918	10.393
16.866911	10.575
16.79779	10.397
16.661097	10.406
16.44593	10.471
16.413166	10.45
16.545011	10.476
16.889247	10.462
16.917089	10.511
16.870916	10.487
16.885759	10.364
16.887651	10.463
16.811205	10.659
16.991565	10.544
16.949098	10.463
16.975316	10.538
17.021943	10.397
16.920253	10.442
16.832236	10.421
16.925169	10.322
17.001729	10.372
17.024884	10.474
17.084858	10.403
16.928858	10.459
16.956028	10.475
16.862026	10.512
16.846282	10.442
16.815859	10.407
16.824128	10.456
16.881833	10.386
16.880258	10.264
16.776119	10.301
16.942929	10.408
16.989768	10.475
16.912632	10.453
16.796323	10.461
16.742731	10.489
16.735681	10.377
16.759844	10.373
16.650721	10.426
16.687775	10.202
16.711496	10.359
16.785982	10.371
16.723101	10.286
16.701759	10.417
16.663078	10.502
16.708223	10.387
16.790317	10.452
16.801808	10.368
16.666672	10.331
16.70531	10.485
16.826823	10.447
16.614981	10.466
16.602201	10.415
16.475937	10.485
16.517371	10.374
16.485653	10.504
16.584953	10.432
16.684177	10.452
16.807339	10.375
16.860235	10.462
16.768684	10.394
16.807876	10.301
16.737728	10.245
16.739446	10.287
16.606263	10.373
16.548118	10.405
16.670928	10.452
16.714226	10.415
16.234694	10.433
16.192118	10.293
16.226434	10.239
16.283117	10.239
16.242112	10.129
16.269264	10.069
16.239228	10.021
16.208705	10.091
16.275825	10.041
16.274853	10.011
16.307562	9.809
16.318561	9.818
16.295445	9.839
16.194021	9.86
16.31083	9.79
16.36899	9.9
16.33747	9.889
16.340988	9.702
16.343013	9.697
16.324739	9.73
16.303321	9.635
16.425094	9.741
16.350781	9.567
16.386663	9.603
16.375054	9.645
16.090994	9.61
16.229993	9.513
16.042086	9.503
16.123907	9.632
16.257036	9.491
16.25961	9.531
16.2731	9.724
16.284444	9.635
16.299413	9.628
16.243387	9.666
16.192456	9.589
16.210682	9.707
16.180023	9.658
16.275312	9.598
16.296789	9.547
16.328581	9.526
16.29991	9.466
16.371681	9.369
16.316127	9.437
16.289684	9.416
16.210998	9.287
16.036678	9.366
16.184158	9.431
16.258864	9.479
16.232841	9.47
16.158739	9.395
16.175293	9.334
16.173972	9.404
16.090683	9.45
16.188607	9.325
16.238123	9.445
16.227379	9.422
16.092134	9.332
15.989155	9.394
16.020402	9.442
16.079821	9.354
16.010609	9.402
16.128753	9.612
16.062961	9.511
16.19426	9.614
16.213017	9.568
16.152335	9.495
16.155436	9.465
16.121295	9.484
16.186538	9.493
16.30947	9.422
16.278633	9.519
16.280628	9.604
16.404071	9.48
16.388911	9.606
16.333201	9.446
16.365775	9.362
16.465533	9.355
16.504546	9.323
16.497378	9.409
16.506259	9.288
16.352261	9.312
16.208981	9.315
16.262778	9.292
16.246049	9.398
16.163026	9.323
16.329356	9.209
16.311754	9.199
16.306966	9.19
16.265884	9.321
16.259087	9.325
16.131678	9.358
16.276922	9.46
16.339624	9.28
16.282296	9.185
16.196572	9.354
16.267364	9.309
16.140252	9.44
16.306815	9.209
16.296925	9.279
16.415689	9.29
16.389551	9.452
16.396379	9.306
16.386495	9.417
16.402642	9.498
16.421753	9.428
16.416003	9.409
16.342137	9.374
16.329299	9.321
16.232884	9.411
16.279048	9.335
16.270228	9.363
16.28615	9.401
16.346636	9.397
16.290679	9.55
16.318472	9.386
16.333457	9.502
16.393139	9.627
16.198596	9.379
16.185381	9.434
16.206709	9.462
16.292123	9.33
16.198576	9.383
16.263453	9.518
16.209774	9.484
16.067461	9.567
16.109211	9.439
16.081256	9.443
16.227085	9.515
16.158774	9.601
16.202102	9.541
16.245412	9.641
16.342245	9.58
16.353254	9.415
16.193081	9.413
16.317256	9.525
16.355615	9.525
16.319798	9.448
16.302551	9.59
16.257714	9.569
16.160247	9.611
16.121574	9.776
16.152382	9.678
16.083007	9.559
16.100688	9.545
16.025271	9.449
16.083526	9.495
16.10128	9.438
16.192414	9.451
16.177199	9.478
16.12864	9.514
16.244637	9.473
16.259119	9.602
16.277513	9.572
16.356215	9.645
16.495449	9.859
16.374566	9.799
16.333226	9.686
16.367139	9.733
16.348504	9.55
16.278855	9.368
16.205982	9.473
16.158561	9.45
16.156368	9.288
16.146884	9.332
16.126297	9.281
16.192164	9.123
16.244605	9.186
16.206532	9.219
16.224854	9.067
16.080061	9.233
16.247342	9.251
16.151109	9.318
16.146595	9.49
16.245848	9.461
16.232446	9.392
16.190997	9.303
16.19058	9.443
16.175494	9.26
16.343059	9.305
16.478786	9.39
16.471616	9.363
16.24318	9.318
16.088478	9.464
16.039016	9.357
16.202143	9.28
16.16505	9.3
16.002729	9.361
16.035101	9.213
16.290463	9.317
16.353117	9.311
16.299336	9.218
16.201719	9.117
16.171122	9.147
16.224761	9.286
16.291201	9.305
16.364592	9.442
16.249697	9.334
16.225719	9.247
16.152796	9.178
16.223756	9.19
16.087236	9.259
16.078488	9.298
16.085849	9.363
16.211668	9.354
16.351001	9.312
16.319071	9.289
16.323629	9.236
16.456357	9.241
16.367301	9.188
16.355042	9.203
16.198808	9.31
16.280084	9.346
16.201577	9.41
16.314419	9.35
16.29097	9.332
16.172762	9.362
16.162103	9.352
16.279231	9.418
16.285589	9.415
16.348676	9.241
16.342846	9.29
16.444337	9.293
16.392913	9.456
16.333244	9.357
16.317911	9.512
16.337801	9.394
16.37165	9.457
16.306913	9.506
16.377187	9.471
16.339785	9.526
16.323705	9.414
16.314909	9.363
16.34075	9.258
16.442434	9.42
16.312429	9.545
16.284919	9.539
16.308684	9.457
16.493363	9.456
16.449311	9.378
16.388077	9.401
16.32167	9.304
16.225049	9.262
16.132826	9.361
16.255108	9.334
16.291068	9.333
16.314683	9.323
16.464346	9.39
16.579518	9.284
16.569322	9.299
16.462156	9.335
16.499914	9.282
16.467403	9.352
16.445732	9.273
16.488849	9.144
16.47917	9.284
16.485664	9.124
16.600101	9.1
16.547476	9.334
16.470778	9.36
16.446574	9.274
16.460434	9.139
16.220945	9.199
16.146524	9.129
16.106718	9.186
16.110577	9.228
16.094648	9.085
16.008036	9.157
16.000938	9.284
16.078786	9.167
16.044773	9.068
16.056276	9.102
16.215055	9.075
16.20487	9.091
16.186938	9.294
16.262562	9.405
16.255883	9.433
16.388871	9.349
16.380523	9.31
16.406598	9.271
16.427986	9.495
16.310872	9.318
16.120799	9.346
16.220191	9.45
16.237435	9.457
16.358667	9.527
16.373865	9.391
16.502794	9.264
16.299047	9.406
16.256699	9.581
16.305106	9.467
16.329988	9.516
16.374556	9.425
16.397735	9.493
16.326227	9.488
16.392629	9.434
16.380345	9.302
16.310872	9.337
16.238685	9.149
16.358813	9.219
15.563094	9.185
15.360404	9.162
15.352215	9.181
15.388457	9.061
15.335599	8.796
15.299201	8.95
15.232007	8.897
15.212702	8.742
15.257859	8.877
15.447578	8.891
15.580763	8.931
15.460571	8.711
15.318193	8.712
15.309429	8.771
15.391253	8.746
15.397492	8.78
15.447616	8.756
15.320446	8.768
15.351129	8.884
15.397997	8.743
15.407373	8.699
15.409831	8.791
15.397493	8.647
15.370264	8.551
15.27761	8.597
15.265543	8.476
15.36452	8.481
15.509353	8.319
15.502244	8.603
15.60749	8.59
15.603844	8.683
15.534544	8.589
15.505226	8.686
15.372074	8.67
15.27136	8.549
15.315681	8.485
15.272801	8.379
15.332849	8.386
15.247409	8.5
15.245902	8.463
15.246977	8.479
15.235831	8.467
15.287699	8.415
15.298104	8.444
15.28592	8.388
15.25082	8.436
15.414688	8.443
15.331919	8.294
15.310662	8.204
15.280002	8.281
15.375084	8.344
15.290779	8.302
15.375181	8.474
15.448472	8.493
15.330302	8.291
15.251946	8.238
15.245511	8.231
15.317411	7.96
15.333109	8.086
15.339686	8.132
15.31184	8.213
15.261049	8.028
15.262211	8.074
15.226518	8.255
15.238774	8.241
15.268455	8.232
15.251278	8.226
15.368304	8.292
15.390668	8.408
15.405602	8.418
15.355776	8.289
15.437485	8.196
15.425979	8.387
15.511834	8.332
15.440208	8.193
15.41098	8.225
15.345578	8.219
15.33789	8.339
15.417313	8.337
15.408149	8.371
15.353479	8.294
15.39298	8.16
15.385396	8.027
15.410719	8.067
15.346726	8.1
15.330486	7.98
15.351254	8.107
15.360849	8.001
15.272987	7.924
15.223174	8.027
15.29241	8.103
15.310629	8.115
15.334163	8.167
15.368236	8.143
15.385342	8.213
15.347915	8.26
15.335984	8.21
15.287178	8.22
15.224427	8.24
15.20972	8.193
15.319723	8.116
15.382897	8.108
15.499001	8.247
15.465633	8.339
15.467778	8.287
15.35715	8.291
15.26436	8.233
15.42215	8.315
15.252366	8.256
15.215888	8.35
15.345006	8.336
15.267858	8.31
15.270586	8.238
15.265674	8.187
15.160957	8.136
15.260346	8.254
15.28652	8.12
15.364315	8.16
15.420504	8.105
15.336597	8.051
15.325081	8.172
15.338736	8.289
15.313489	8.146
15.283694	8.147
15.200405	8.223
15.236175	8.369
15.344581	8.344
15.309102	8.356
15.355469	8.516
15.203224	8.547
15.289517	8.594
15.331941	8.503
15.350223	8.675
15.399473	8.593
15.39874	8.626
15.358999	8.616
15.445442	8.634
15.469277	8.633
15.530035	8.701
15.513175	8.707
15.514567	8.479
15.46778	8.407
15.545203	8.338
15.506055	8.306
15.357394	8.38
15.39734	8.361
15.341661	8.377
15.434875	8.42
15.29322	8.466
15.276335	8.463
15.213977	8.515
15.326582	8.325
15.29955	8.332
15.287172	8.101
15.332681	8.29
15.246097	8.327
15.344772	8.392
15.190074	8.339
15.331292	8.289
15.231552	8.397
15.288935	8.34
15.146969	8.368
15.159161	8.387
15.201712	8.373
15.210002	8.313
15.273318	8.409
15.175842	8.301
15.033328	8.46
15.116076	8.337
15.174359	8.193
15.208365	8.233
15.199696	8.338
15.196699	8.326
15.290143	8.308
15.404915	8.385
15.429841	8.335
15.386779	8.29
15.437397	8.329
15.484024	8.343
15.490054	8.452
15.470174	8.382
15.528848	8.371
15.483261	8.307
15.454394	8.346
15.537815	8.336
15.502463	8.37
15.451416	8.362
15.443034	8.386
15.432758	8.394
15.359917	8.47
15.432855	8.397
15.370367	8.422
15.37689	8.457
15.337919	8.38
15.373648	8.315
15.323847	8.329
15.398284	8.364
15.379965	8.367
15.359024	8.178
15.331036	8.139
15.359112	8.412
15.513175	8.278
15.504544	8.362
15.41292	8.163
15.369383	8.24
15.386279	8.287
15.395022	8.291
15.360064	8.186
15.438343	8.114
15.426229	8.149
15.474118	8.131
15.438822	8.104
15.413717	8.174
15.36891	8.181
15.370948	8.265
15.349985	8.257
15.447928	8.149
15.449994	8.193
15.306499	8.142
15.408169	8.133
15.424896	8.207
15.44333	8.261
15.393532	8.388
15.301761	8.387
15.282427	8.328
15.290135	8.247
15.254093	8.187
15.300213	8.229
15.240413	8.282
15.177818	8.39
15.246286	8.371
15.378447	8.378
15.39701	8.393
15.357469	8.543
15.280828	8.433
15.26061	8.517
15.266719	8.509
15.29824	8.536
15.341583	8.607
15.288699	8.555
15.276874	8.53
15.403145	8.596
15.415075	8.613
15.43693	8.708
15.554351	8.587
15.41701	8.743
15.236879	8.661
15.212068	8.797
15.118493	8.728
15.16073	8.779
15.302582	8.677
15.260791	8.733
15.271256	8.696
15.342468	8.566
15.338092	8.532
15.298058	8.474
15.327846	8.534
15.439649	8.597
15.449451	8.467
15.433746	8.427
15.422272	8.358
15.411893	8.255
15.396307	8.357
15.496381	8.392
15.458107	8.284
15.556596	8.248
15.5389	8.401
15.427667	8.326
15.464355	8.282
15.461052	8.286
15.408201	8.293
15.372703	8.226
15.317403	8.058
15.260749	8.401
15.280378	8.306
15.331921	8.262
15.354197	8.224
15.342285	8.259
15.407175	8.191
15.342523	8.191
15.212762	8.25
15.257758	8.293
15.248022	8.299
15.34013	8.32
15.200049	8.277
15.098453	8.281
15.084859	8.417
15.036304	8.31
15.119832	8.226
15.220423	8.343
15.217616	8.154
15.168048	8.235
15.265478	8.32
15.090274	8.318
15.229557	8.205
15.338825	8.223
15.334158	8.283
15.410901	8.214
15.446666	8.091
15.515551	8.198
15.554176	8.081
14.46394	8.182
14.411301	8.297
14.387911	8.218
14.38905	8.144
14.322502	8.128
14.346599	7.926
14.336659	7.903
14.437409	7.711
14.410785	7.735
14.38871	7.758
14.476254	7.63
14.515834	7.674
14.548305	7.8
14.528585	7.757
14.496293	7.806
14.616818	7.66
14.622846	7.73
14.557602	7.592
14.539652	7.642
14.474484	7.425
14.530687	7.62
14.470394	7.464
14.561153	7.478
14.443959	7.479
14.384238	7.576
14.350555	7.656
14.454208	7.679
14.485493	7.708
14.448492	7.531
14.503913	7.518
14.44619	7.368
14.446196	7.337
14.437417	7.395
14.335158	7.534
14.279715	7.385
14.261408	7.364
14.258013	7.482
14.319366	7.498
14.33565	7.638
14.316677	7.404
14.323364	7.386
14.280271	7.404
14.389669	7.356
14.332565	7.462
14.416443	7.518
14.475428	7.407
14.530748	7.56
14.417957	7.502
14.455774	7.574
14.306388	7.903
14.265593	7.636
14.256418	7.546
14.216757	7.526
14.312435	7.483
14.411474	7.264
14.461391	7.518
14.377093	7.502
14.401164	7.541
14.331484	7.456
14.28172	7.4
14.268729	7.389
14.21876	7.24
14.292007	7.401
14.308254	7.388
14.44	7.386
14.413605	7.497
14.457903	7.431
14.434942	7.461
14.373261	7.455
14.415091	7.399
14.399855	7.456
14.252119	7.332
14.293685	7.414
14.275216	7.257
14.348047	7.279
14.426764	7.433
14.4394	7.197
14.398718	7.309
14.358139	7.415
14.384258	7.348
14.40043	7.421
14.339556	7.358
14.383576	7.257
14.42291	7.376
14.350908	7.425
14.375243	7.354
14.361536	7.433
14.397754	7.266
14.437826	7.489
14.434385	7.329
14.54787	7.339
14.492183	7.261
14.489781	7.227
14.416482	7.334
14.390724	7.29
14.531536	7.397
14.486193	7.391
14.467324	7.464
14.486329	7.493
14.438548	7.44
14.594159	7.474
14.59241	7.492
14.447626	7.529
14.55371	7.579
14.546556	7.359
14.450965	7.533
14.442872	7.348
14.311896	7.335
14.294229	7.39
14.220826	7.241
14.241794	7.39
14.29296	7.222
14.328037	7.02
14.293415	7.168
14.234362	7.168
14.242911	7.238
14.246298	7.091
14.262031	7.287
14.306169	7.444
14.296413	7.457
14.393044	7.469
14.452569	7.451
14.525864	7.243
14.394642	7.306
14.323643	7.386
14.336325	7.342
14.333943	7.352
14.332089	7.399
14.482541	7.242
14.545389	7.304
14.45898	7.233
14.332542	7.292
14.357215	7.244
14.293264	7.252
14.291369	7.265
14.263397	7.125
14.308152	7.205
14.380027	7.051
14.289878	7.103
14.198518	7.198
14.128947	7.25
14.160054	7.313
14.163759	7.241
14.194159	7.502
14.209445	7.311
14.207925	7.482
14.261823	7.389
14.36781	7.453
14.380743	7.454
14.44989	7.327
14.526632	7.266
14.363081	7.245
14.308515	7.155
14.311592	7.211
14.489363	7.075
14.510248	7.178
14.333461	7.154
14.400044	7.098
14.434504	6.934
14.318442	7.033
14.304277	7.051
14.285039	7.157
14.249491	7.042
14.307331	7.257
14.272503	7.259
14.287732	7.119
14.297841	7.072
14.346711	7.124
14.326546	7.09
14.247094	7.024
14.287204	7.026
14.311149	7.053
14.219909	7.076
14.304432	6.966
14.367188	7.129
14.227175	7.01
14.258779	6.953
14.328034	7.144
14.296486	7.291
14.198152	7.323
14.208755	7.239
14.214281	7.182
14.210956	7.19
14.368321	7.231
14.381992	7.218
14.407568	7.324
14.330106	7.378
14.454129	7.293
14.352131	7.373
14.205993	7.312
14.242269	7.281
14.31145	7.316
14.257787	7.392
14.327962	7.221
14.405812	7.271
14.403297	6.98
14.395908	7.043
14.407058	7.164
14.29523	7.027
14.326456	7.053
14.331653	7.084
14.339015	7.228
14.297431	6.986
14.27773	7.002
14.208775	6.86
14.274838	7.014
14.267641	7.032
14.172858	7.011
14.381031	7.102
14.44333	7.081
14.463812	7.019
14.524713	7.163
14.505506	7.23
14.373538	7.203
14.518127	7.348
14.556919	7.331
14.500204	7.451
14.446174	7.251
14.371511	7.268
14.342508	7.209
14.406534	7.056
14.377229	7.17
14.28799	7.369
14.323216	7.258
14.324771	7.454
14.269554	7.294
14.230115	7.231
14.261522	7.273
14.252502	7.227
14.319388	7.458
14.388963	7.391
14.464616	7.325
14.458853	7.381
14.503598	7.323
14.377947	7.317
14.547744	7.375
14.547961	7.429
14.577223	7.431
14.558912	7.304
14.4652	7.191
14.354586	7.348
14.287317	7.312
14.343684	7.2
14.260071	7.262
14.40907	7.116
14.299571	7.249
14.321373	7.22
14.271442	7.183
14.49828	7.29
14.532984	7.365
14.542854	7.331
14.491251	7.161
14.458801	7.338
14.498921	7.42
14.51644	7.433
14.474896	7.265
14.484123	7.189
14.415888	7.099
14.472467	7.132
14.572329	7.1
14.590583	7.136
14.4473	7.253
14.359281	7.039
14.365229	7.288
14.366454	7.261
14.438283	7.426
14.562079	7.39
14.509663	7.343
14.536969	7.328
14.513729	7.38
14.384558	7.382
14.41839	7.495
14.33796	7.433
14.274156	7.437
14.23071	7.341
14.345742	7.371
14.381951	7.435
14.317271	7.378
14.465669	7.332
14.330006	7.351
14.157244	7.23
14.158687	7.188
14.27319	7.111
14.298515	7.253
14.406716	7.141
14.486642	7.303
14.482382	7.287
14.51409	7.415
14.315426	7.442
14.377188	7.384
14.312053	7.32
14.263665	7.428
14.348578	7.492
14.350161	7.397
14.337343	7.327
14.277208	7.266
14.280886	7.155
14.376701	7.151
14.339957	7.181
14.437415	7.109
13.022537	7.045
12.896194	6.919
13.070175	7.023
13.110417	6.785
13.104212	6.683
13.102177	6.753
13.204951	6.815
13.10355	6.814
13.135495	6.755
13.19489	6.734
13.109599	6.733
13.18851	6.708
13.101621	6.522
13.055328	6.472
13.188444	6.515
13.182632	6.344
13.164751	6.385
13.07596	6.261
12.998281	6.228
12.997916	6.293
12.840146	6.158
13.122644	6.093
13.188458	6.103
13.218996	6.066
13.226589	6.103
13.261079	6.285
13.276129	6.228
13.129841	6.108
13.235745	6.074
13.183256	6.078
13.109576	6.213
13.217488	6.109
13.185202	6.264
13.257121	6.205
13.20255	6.255
13.2664	6.288
13.158857	6.383
13.250493	6.389
13.179688	6.351
13.166443	6.319
13.04431	6.394
13.024021	6.324
13.097792	6.18
13.18417	6.242
13.122284	6.148
13.197389	6.169
13.275285	6.186
13.156201	6.084
13.294901	6.002
13.195062	5.943
13.164787	6.155
13.031526	6.243
13.11813	6.063
13.084698	6.277
13.228349	6.021
13.184847	6.109
13.218318	6.223
13.270349	6.202
13.217274	6.244
13.176976	6.237
13.00292	6.319
13.048897	6.383
12.998803	6.173
12.971005	6.151
13.059783	6.252
13.006503	6.314
13.102359	6.261
13.153556	6.356
13.157032	6.449
13.216512	6.613
13.245716	6.376
13.275046	6.549
13.358879	6.573
13.251188	6.478
13.124585	6.591
13.145833	6.561
13.163922	6.55
13.168621	6.143
13.222196	6.254
13.137791	6.404
13.177881	6.15
13.172252	6.309
13.213068	6.272
13.250379	6.413
13.211181	6.523
13.244666	6.511
13.187654	6.469
13.237369	6.335
13.17555	6.322
13.239184	6.297
13.115424	6.25
13.15691	6.356
13.141228	6.381
13.315342	6.228
13.271762	6.362
13.223918	6.188
13.1015	6.002
13.154969	6.293
13.194704	6.397
13.093	6.372
13.240329	6.139
13.085518	6.1
13.233869	6.257
13.214867	6.284
13.285995	6.357
13.284996	6.432
13.284225	6.561
13.150362	6.369
13.169825	6.191
13.184862	6.268
13.14073	6.136
13.146856	6.128
13.186815	6.149
13.240403	6.16
13.230704	6.153
13.388253	6.255
13.380772	6.292
13.328008	6.257
13.27622	6.133
13.244641	6.161
13.309348	6.226
13.310862	6.19
13.210574	6.258
13.164213	6.119
13.176992	6.144
13.113538	6.02
13.176962	6.075
13.15762	6.145
13.199906	6.133
13.171195	6.259
13.189321	6.188
13.084356	6.214
13.224784	6.316
13.249452	6.226
13.302044	6.196
13.244756	6.277
13.182693	6.314
13.206221	6.361
13.131161	6.321
13.124685	6.289
13.184515	6.461
13.195375	6.595
13.217587	6.917
13.090278	6.773
12.988815	6.595
12.978221	6.755
13.19752	6.675
13.282619	6.635
13.145082	6.663
13.114831	6.645
13.126887	6.655
13.191593	6.47
13.016534	6.655
13.146964	6.563
13.268451	6.668
13.25761	6.743
13.270166	6.66
13.170112	6.491
13.196364	6.516
13.082202	6.497
13.172474	6.612
13.131714	6.446
13.108031	6.364
13.090733	6.489
13.094919	6.289
13.032237	6.313
13.170199	6.332
13.085264	6.524
13.115708	6.406
13.132775	6.45
13.180489	6.627
13.176801	6.628
13.120124	6.572
13.071122	6.593
13.094401	6.446
13.119485	6.393
13.195438	6.254
13.204194	6.404
13.144822	6.239
13.087808	6.113
13.061316	6.301
13.06379	6.237
13.081389	6.424
12.902489	6.444
12.939481	6.422
12.908218	6.437
13.08395	6.416
13.133834	6.38
13.06523	6.438
13.009865	6.332
13.063565	6.442
13.053014	6.337
13.115699	6.315
13.217703	6.059
13.14229	6.217
13.182338	6.181
13.06726	6.095
13.1649	6.255
13.036995	6.327
13.077594	6.097
12.942635	6.112
13.07632	6.023
13.089952	6.215
13.084367	6.306
13.217676	6.395
13.122789	6.361
13.158861	6.351
13.026254	6.27
13.129277	6.326
13.13211	6.213
13.07011	6.088
13.134355	6.182
13.209909	6.213
13.210973	6.078
13.171171	5.998
13.007274	6.131
13.062871	6.217
13.083811	6.262
13.174239	6.25
13.167078	6.182
13.109102	6.075
13.229409	6.297
13.19824	6.204
13.070701	6.211
13.225847	6.126
13.207679	6.115
13.198759	6.082
13.146407	6.037
13.258523	6.021
12.964695	5.936
13.053467	6.144
12.961097	6.15
12.959629	6.101
12.90504	5.965
13.089271	6.163
13.020193	6.304
13.229759	6.247
13.149541	6.375
13.124296	6.306
13.120504	6.398
13.066298	6.212
13.108007	6
13.218143	6.142
13.187318	6.087
13.072773	6.181
13.099156	6.211
13.137991	6.236
13.211781	6.342
13.181734	6.416
13.02027	6.423
13.166377	6.378
13.273868	6.405
13.169862	6.274
13.170098	6.399
13.097822	6.212
13.16158	6.273
13.165646	6.349
13.040154	6.164
12.989184	6.3
13.196375	6.198
13.118261	6.045
13.029772	6.046
13.154012	6.037
13.009972	6.062
13.188745	6.119
13.143646	5.911
13.150856	5.889
13.11688	5.886
13.233182	5.812
13.095741	5.807
13.214822	5.997
13.100749	6.009
13.255783	6.027
13.139966	6.108
13.16763	5.981
13.159596	6.218
13.137759	5.911
13.09401	6.039
13.155681	6.1
13.10727	6.12
13.048934	6.156
13.063092	6.099
13.049057	6.051
13.090081	6.018
13.124108	5.973
13.038504	5.993
13.148831	6.099
13.092312	6.026
13.115974	5.987
13.159429	6.177
13.125739	6.039
13.103073	6.338
12.969624	6.103
12.862574	6.146
13.045096	6.009
13.129695	6.159
13.067416	6.102
13.209422	6.063
13.168695	6.114
13.163916	6.193
12.216549	6.063
12.112413	6.023
12.192639	6.068
12.163912	5.691
12.112731	5.71
12.313745	5.381
12.361964	5.652
12.29959	5.743
12.263507	5.494
12.360182	5.618
12.281501	5.851
12.212939	5.669
12.148298	5.852
12.218893	5.775
12.099857	5.763
12.206336	5.776
12.239491	5.403
12.140678	5.403
12.232117	5.248
12.187221	5.313
12.19577	5.29
12.266429	5.133
12.227312	5.33
12.199668	5.362
12.268726	5.435
12.197692	5.148
12.279321	5.519
12.238937	5.565
12.249013	5.562
12.270242	5.562
12.257	5.65
12.227203	5.599
12.167801	5.643
12.146581	5.463
12.186219	5.457
12.181413	5.369
12.163284	5.458
12.170436	5.269
12.251056	5.247
12.30295	5.314
12.333435	5.408
12.274589	5.269
12.230794	5.476
12.228573	5.391
12.348948	5.416
12.337518	5.28
12.261777	5.349
12.303617	5.35
12.272433	5.323
12.32933	5.403
12.359127	5.7
12.297697	5.559
12.257353	5.477
12.199473	5.491
12.06816	5.615
12.062734	5.53
12.005368	5.652
12.187702	5.429
12.290691	5.485
12.118668	5.521
12.157628	5.45
12.166868	5.383
12.179798	5.398
12.195232	5.283
12.265263	5.333
11.973162	5.278
12.224358	5.278
12.176527	5.341
12.108611	5.327
12.138258	5.348
12.108927	5.437
12.083602	5.594
12.2059	5.713
12.28019	5.584
12.404467	5.573
12.163005	5.679
12.300554	5.533
12.305885	5.618
12.225643	5.552
12.281578	5.525
12.217986	5.426
12.317553	5.457
12.351815	5.336
12.445296	5.39
12.290983	5.782
12.149315	5.395
12.153734	5.412
12.126141	5.714
12.115535	5.517
11.997655	5.484
11.956121	5.476
12.022065	5.562
12.16134	5.529
12.152246	5.407
12.276262	5.4
12.306411	5.456
12.327834	5.492
12.11523	5.447
12.185287	5.469
12.128631	5.47
12.139369	5.447
12.198669	5.39
12.202302	5.355
12.080478	5.427
12.214833	5.384
12.218617	5.274
12.187415	5.151
12.155725	5.229
12.130103	5.277
12.10223	5.38
12.037637	5.508
12.132793	5.641
12.109149	5.407
12.300898	5.548
12.255914	5.293
12.156663	5.387
12.074352	5.243
12.234528	5.289
12.12711	5.384
12.178279	5.446
12.18271	5.657
12.095485	5.529
12.051394	5.312
12.061295	5.45
11.987902	5.455
12.009821	5.422
12.146484	5.386
12.174651	5.342
12.152578	5.413
12.208308	5.18
12.13442	5.362
12.106895	5.317
12.124216	5.255
12.145815	5.267
12.239404	5.205
12.150304	5.334
12.210204	5.457
12.229375	5.355
12.171521	5.484
12.221585	5.52
12.068632	5.411
12.178189	5.389
12.202311	5.572
12.191191	5.636
12.152628	5.333
12.085019	5.284
12.151719	5.205
12.191653	5.014
12.264434	5.038
12.296345	5.111
12.160534	5.152
12.229785	5.044
12.260931	5.148
12.312846	5.199
12.300259	5.163
12.118299	5.177
12.183986	5.225
12.199594	5.075
12.197581	5.016
12.370275	5.185
12.224577	5.294
12.330028	5.266
12.293371	5.312
12.308514	5.479
12.248006	5.437
12.25856	5.536
12.343761	5.453
12.273162	5.39
12.276317	5.198
12.248885	5.362
12.082951	5.279
12.273865	5.288
12.309796	5.249
12.395208	5.145
12.243024	5.049
12.32953	5.134
12.104069	5.137
12.028956	5.251
12.117403	5.237
12.205167	5.407
12.082384	5.376
12.231103	5.424
12.345781	5.448
12.384603	5.301
12.341428	5.405
12.246622	5.348
12.253078	5.549
12.339413	5.41
12.2982	5.266
12.255296	5.287
12.122018	5.313
12.213687	5.321
12.162008	5.15
12.041905	5.057
12.07558	5.172
12.113807	5.403
12.277086	5.412
12.221092	5.333
12.265821	5.48
12.204139	5.366
12.310898	5.425
12.264819	5.288
12.247822	5.435
12.269769	5.405
12.188245	5.427
12.237572	5.43
12.234209	5.424
12.265629	5.358
12.297203	5.38
12.374922	5.37
12.357953	5.278
12.199431	5.228
12.100625	5.129
11.994894	5.037
12.102331	5.021
12.164469	4.841
12.198143	4.876
12.235842	4.99
12.253339	4.998
12.266422	4.939
12.296222	5.203
12.334637	5.04
12.242783	5
12.123335	5.054
12.230636	5.392
12.364492	5.53
12.311791	5.697
12.377835	5.268
12.247704	5.181
12.214824	5.323
12.285693	5.166
12.200043	5.252
12.259259	5.069
12.248284	5.216
12.203146	5.248
12.287387	5.321
12.186024	5.276
12.203452	5.122
12.28729	5.015
12.290779	5.182
12.297406	5.172
12.222826	5.214
12.286124	5.313
12.335969	5.571
12.319751	5.449
12.245361	5.412
12.272231	5.309
12.332496	5.537
12.371857	5.638
12.365184	5.558
12.38483	5.488
12.297016	5.552
12.375001	5.422
12.320566	5.448
12.271565	5.436
12.247326	5.221
12.247007	5.176
12.323509	5.34
12.311535	5.369
12.302245	5.274
12.243909	5.271
12.163899	5.141
12.229777	5.303
12.314512	5.563
12.324728	5.398
12.275025	5.356
12.335603	5.374
12.33628	5.548
12.355847	5.592
12.328732	5.548
12.193561	5.475
12.299569	5.477
12.211108	5.478
12.257585	5.357
12.216929	5.546
12.300435	5.435
12.312802	5.32
12.32657	5.59
12.215459	5.298
12.160849	5.23
12.239556	5.291
12.190607	5.255
12.164582	5.281
12.27748	5.391
12.226461	5.657
12.231698	5.478
12.24704	5.297
12.274822	5.208
12.36791	5.263
12.307918	5.136
12.331833	5.095
12.237362	5.106
12.132316	5.247
12.185807	5.191
12.207793	5.459
12.307273	5.472
12.336879	5.42
12.290891	5.375
12.195481	5.362
12.267479	5.303
11.330466	5.088
11.32767	5.164
11.361816	5.252
11.377818	5.268
11.407171	5.212
11.394427	5.195
11.450542	5.005
11.35953	4.99
11.462662	4.932
11.441612	4.937
11.334818	4.729
11.394909	4.807
11.287395	4.632
11.293473	4.516
11.349083	4.642
11.40535	4.65
11.406178	4.764
11.433041	4.753
11.478549	4.732
11.461007	4.646
11.348223	4.945
11.384845	4.907
11.266851	4.776
11.246872	4.745
11.215383	4.479
11.178205	4.527
11.307889	4.464
11.276185	4.67
11.254773	4.578
11.326557	4.477
11.376735	4.437
11.378402	4.433
11.351115	4.492
11.376307	4.354
11.36552	4.464
11.380183	4.226
11.335354	4.4
11.367751	4.388
11.264232	4.381
11.408261	4.324
11.341632	4.298
11.34173	4.122
11.473891	4.3
11.348716	4.174
11.354226	4.132
11.363061	4.315
11.34013	4.294
11.26344	4.222
11.329908	4.238
11.399452	4.26
11.367634	4.476
11.335072	4.443
11.346711	4.511
11.386385	4.344
11.382001	4.473
11.383061	4.289
11.326797	4.354
11.332789	4.25
11.381738	4.395
11.367687	4.41
11.336793	4.392
11.312145	4.598
11.386877	4.696
11.466481	4.501
11.438545	4.493
11.446392	4.371
11.462835	4.381
11.353546	4.331
11.38459	4.343
11.464354	4.491
11.500088	4.373
11.478508	4.457
11.537302	4.394
11.53745	4.423
11.561532	4.521
11.490677	4.599
11.527458	4.631
11.560179	4.782
11.431248	4.601
11.57904	4.616
11.382722	4.496
11.433432	4.596
11.317151	4.552
11.268374	4.612
11.241865	4.502
11.132843	4.597
11.381185	4.689
11.323867	4.551
11.360056	4.527
11.185725	4.384
11.203788	4.501
11.247956	4.815
11.40322	4.634
11.337331	4.85
11.363555	4.632
11.43211	4.553
11.430766	4.511
11.338354	4.338
11.334062	4.398
11.321435	4.364
11.387981	4.573
11.391558	4.624
11.425871	4.502
11.565321	4.536
11.42431	4.651
11.388554	4.735
11.433109	4.501
11.310802	4.522
11.365369	4.339
11.337513	4.37
11.357145	4.588
11.358193	4.712
11.342112	4.834
11.318849	4.831
11.305013	4.725
11.166251	4.591
11.280704	4.665
11.329369	4.714
11.345224	4.749
11.267837	4.613
11.383034	4.761
11.358339	4.729
11.37877	4.701
11.410411	4.68
11.456874	4.557
11.38422	4.74
11.364465	4.677
11.126793	4.621
11.315104	4.85
11.298937	4.871
11.425333	4.902
11.352697	4.692
11.448035	4.417
11.365841	4.738
11.382874	4.591
11.393726	4.38
11.348613	4.627
11.275031	4.514
11.353238	4.272
11.260123	4.625
11.318218	4.516
11.348302	4.559
11.375225	4.663
11.365137	4.471
11.306546	4.616
11.3479	4.508
11.318082	4.512
11.418724	4.698
11.448563	4.534
11.490706	4.563
11.549229	4.522
11.456818	4.608
11.393522	4.592
11.379103	4.534
11.351913	4.465
11.311994	4.572
11.37641	4.507
11.406631	4.439
11.330729	4.441
11.302488	4.566
11.332888	4.537
11.332742	4.456
11.244367	4.501
11.390307	4.559
11.37805	4.473
11.346294	4.511
11.408984	4.568
11.386175	4.574
11.347413	4.669
11.24832	4.609
11.364276	4.569
11.430985	4.543
11.408055	4.47
11.458535	4.371
11.465038	4.378
11.364441	4.273
11.368968	4.444
11.420132	4.381
11.491351	4.37
11.416558	4.526
11.456287	4.225
11.381064	4.053
11.379393	4.126
11.404605	4.213
11.402662	4.185
11.454174	4.296
11.492519	4.305
11.421687	4.224
11.382843	4.483
11.301229	4.361
11.321583	4.284
11.357108	4.423
11.403593	4.393
11.482814	4.352
11.380505	4.515
11.412664	4.419
11.488657	4.499
11.502039	4.465
11.374596	4.536
11.358936	4.543
11.444945	4.698
11.422013	4.61
11.504143	4.719
11.385181	4.553
11.644003	4.696
11.459651	4.487
11.543944	4.569
11.358401	4.495
11.499425	4.33
11.544709	4.598
11.580928	4.392
11.425013	4.428
11.41214	4.432
11.294189	4.42
11.44273	4.425
11.470696	4.541
11.494692	4.63
11.450159	4.595
11.44404	4.709
11.361881	4.612
11.305298	4.52
11.314803	4.622
11.362728	4.72
11.377948	4.654
11.271655	4.772
11.307859	4.758
11.473591	4.532
11.487171	4.423
11.482908	4.461
11.402555	4.593
11.45234	4.739
11.434001	4.823
11.323749	4.691
11.398672	4.549
11.390204	4.695
11.399382	4.767
11.35851	4.643
11.304117	4.791
11.322791	4.895
11.341397	4.746
11.319504	4.746
11.395494	4.829
11.402385	4.978
11.465322	4.77
11.406372	4.773
11.411906	4.862
11.368664	4.796
11.386309	4.664
11.299199	4.597
11.366783	4.71
11.421695	4.576
11.385919	4.688
11.458888	4.579
11.476245	4.358
11.459839	4.419
11.440643	4.444
11.37954	4.354
11.407601	4.233
11.247243	4.349
11.285276	4.471
11.363815	4.374
11.31227	4.429
11.301222	4.331
11.30976	4.401
11.336217	4.454
11.412444	4.283
11.42888	4.492
11.371561	4.346
11.491797	4.409
11.457675	4.273
11.46613	4.255
11.352755	4.246
11.362527	4.673
11.491504	4.359
11.600581	4.83
11.57091	4.784
11.565417	4.475
11.571858	4.507
11.506882	4.365
11.490531	4.269
11.542441	4.198
11.531946	4.438
11.50929	4.381
11.436698	4.387
11.413941	4.452
11.361571	4.356
11.355248	4.596
11.353733	4.298
11.391002	4.398
11.32409	4.342
11.24664	4.335
11.403824	4.251
11.312353	4.381
11.306879	4.465
11.311281	4.459
11.273297	4.862
11.330474	4.583
11.317829	4.477
11.262852	4.502
11.337667	4.421
10.815521	4.803
10.786437	4.498
10.852978	4.614
10.839717	4.533
10.899225	4.528
10.783341	4.326
10.841764	4.395
10.757588	4.525
10.757825	4.108
10.850212	4.279
10.909495	4.326
10.874095	4.096
10.833422	4.089
10.871042	4.121
10.912288	4.057
10.848154	4.02
10.791106	3.974
10.853275	4.148
10.873802	4.035
10.827606	4.195
10.856329	4.015
10.832176	4.023
10.834716	4.02
10.916759	4.082
10.838689	4.122
10.853054	4.082
10.796133	4.077
10.87171	4.153
10.867446	3.924
10.799415	3.899
10.980174	3.93
10.890478	4.032
10.889487	4.095
10.862127	4.308
10.807089	4.393
10.833809	4.288
10.790889	4.286
10.870643	4.238
10.774527	4.278
10.846667	4.42
10.791286	4.257
10.855466	4.229
10.875548	4.345
10.860866	4.296
10.805587	4.273
10.851229	4.347
10.89029	4.348
10.890166	4.269
10.830489	4.212
10.805292	4.132
10.872749	4.237
10.905017	4.443
10.918177	4.373
10.862668	4.297
10.85114	4.237
10.877295	4.094
10.861344	4.401
10.831171	4.304
10.838356	4.748
10.909719	4.311
10.83837	4.355
10.864718	4.281
10.704847	4.273
10.863211	4.332
10.858504	4.231
10.907444	4.183
10.779629	4.176
10.828937	4.1
10.88403	4.169
10.837526	4.105
10.857223	4.243
10.783563	4.079
10.769233	4.164
10.801878	4.259
10.799129	4.202
10.873051	4.385
10.831319	4.348
10.876052	4.33
10.948582	4.181
10.946786	4.281
10.928022	4.052
10.93579	4.06
10.980315	4.136
10.89256	4.08
10.837643	3.963
10.913568	4.266
10.840824	4.293
10.820994	4.171
10.87895	4.27
10.904462	4.178
10.802522	4.028
10.891083	4.102
10.816387	4.272
10.73245	4.345
10.830923	4.158
10.8481	4.069
10.76254	4.18
10.896407	4.223
10.816656	4.09
10.77692	4.053
10.820382	4.155
10.765011	4.182
10.795828	4.136
10.780535	4.032
10.721818	3.948
10.773434	3.904
10.771095	4.088
10.751486	3.886
10.773379	4.17
10.82462	4.569
10.811939	3.983
10.795956	4.711
10.810878	3.989
10.788584	4.152
10.849462	3.97
10.85272	3.905
10.834091	3.867
10.831236	3.815
10.85915	3.755
10.801144	4.561
10.829173	3.914
10.894105	3.78
10.905781	4.212
10.860122	3.903
10.752928	3.7
10.840998	3.791
10.895696	4.01
10.898818	4.256
10.891872	4.012
10.877349	3.992
10.760754	3.847
10.81001	3.81
10.783395	3.836
10.870947	4.034
10.839598	3.995
10.812831	3.987
10.826672	3.978
10.903864	3.987
10.91159	4.062
10.756368	3.9
10.832109	3.812
10.898913	3.915
10.859585	4.016
10.873876	4.035
10.858797	3.827
10.897045	4.056
10.874296	4.112
10.869694	4.131
10.917759	4.18
10.783985	4.172
10.91277	4.201
10.927249	4.192
10.810398	4.385
10.815866	4.329
10.811554	4.231
10.772031	4.245
10.806628	4.261
10.773749	4.244
10.836773	4.436
10.818054	4.178
10.851332	4.185
10.902768	4.321
10.893771	4.12
10.938537	4.236
10.984396	4.031
10.983046	3.946
10.890614	4.282
10.825232	4.193
10.835425	4.191
10.833957	4.279
10.861473	4.328
10.838314	4.282
10.855899	4.387
10.919681	4.434
10.861997	4.336
10.889799	4.296
10.811645	4.102
10.844022	4.219
10.756234	4.339
10.853716	4.43
10.858412	4.508
10.858275	4.455
10.897853	4.503
10.862046	4.338
10.837261	4.399
11.044711	4.308
10.995489	4.406
10.922972	4.41
10.907936	4.387
10.860099	4.302
10.90754	4.336
10.821056	4.422
10.789559	4.322
10.902317	4.256
10.811974	4.155
10.840348	4.293
10.80613	4.276
10.828554	3.997
10.788945	4.073
10.845489	4.29
10.888697	4.239
10.784396	4.332
10.770791	4.325
10.751768	4.296
10.78986	4.4
10.846265	4.264
10.862578	4.28
10.883528	4.243
10.902559	4.282
10.849872	4.139
10.941969	4.095
10.909113	4.353
10.964074	4.07
11.004158	4.295
10.924947	4.34
10.798168	4.329
10.960675	4.261
10.859543	4.334
10.79802	4.078
10.901918	4.127
10.794292	4.198
10.843026	4.2
10.829918	4.051
10.882482	3.79
10.884656	3.925
10.900616	4.048
10.969513	3.944
11.002709	4.089
10.877132	4.011
10.777264	4.026
10.926498	4.205
10.858369	4.19
10.838719	4.037
10.851368	4.152
10.843928	3.967
10.893234	4.038
10.800074	3.961
10.858162	3.987
10.908375	4.172
10.893065	4.134
10.923694	4.305
10.977477	4.261
10.903897	4.405
10.981397	4.284
10.890841	4.165
10.866793	4.241
10.842115	4.274
10.89966	4.181
10.884281	3.933
10.935132	3.945
10.884329	3.907
10.95532	3.841
10.89388	3.786
10.945938	3.846
10.926322	3.804
10.924858	3.935
10.937595	3.89
10.855065	3.897
10.836417	4.168
10.872414	4.146
10.94108	4.24
10.837044	4.12
10.947698	4.125
10.984558	4.225
10.96593	4.147
10.942767	4
10.87719	4.116
10.941636	4.069
10.880859	4.275
10.867193	4.022
10.815915	4.12
10.849525	4.146
10.874209	4.18
10.947239	4.206
10.961069	4.175
10.93265	4.136
10.828252	4.23
10.91353	4.36
10.968447	4.23
10.828659	4.324
10.927249	4.29
10.87361	4.373
10.797693	4.217
10.813132	4.193
10.784792	4.193
10.715279	4.182
10.821279	4.279
10.890169	4.359
10.781694	4.224
10.85183	4.345
10.782866	4.18
10.782366	4.173
10.859195	4.222
10.913732	4.246
10.92199	4.256
10.810404	3.983
10.774918	4.233
10.914405	
10.81643	4.502
10.882719	4.452
10.34069	4.33
10.34069	4.383
10.392847	4.391
10.345026	4.285
10.401282	4.132
10.394542	4.06
10.409012	4.283
10.404871	4.234
10.446203	4.219
10.366153	4.319
10.383918	4.041
10.415075	4.063
10.313724	4.136
10.315568	4.028
10.305895	4.069
10.451742	3.962
10.465108	3.801
10.379078	4.002
10.427219	4.027
10.378242	3.988
10.384858	3.966
10.410927	3.84
10.471193	3.83
10.427276	3.973
10.433315	3.847
10.332394	3.958
10.393133	3.678
10.383862	3.78
10.355717	3.838
10.300901	3.781
10.399904	3.799
10.451871	3.79
10.470007	3.87
10.415712	3.883
10.37487	3.809
10.533321	3.761
10.468037	3.654
10.461996	3.615
10.474588	3.763
10.559112	3.706
10.590423	3.954
10.523105	4.065
10.501843	4.202
10.460823	3.944
10.604005	3.959
10.457102	3.996
10.524155	3.823
10.534127	3.776
10.527455	3.887
10.521822	3.749
10.593238	3.69
10.442707	3.653
10.510694	3.586
10.433881	3.649
10.495164	3.573
10.406664	3.594
10.540346	3.656
10.542168	3.465
10.458676	3.803
10.426265	3.685
10.522217	3.702
10.489652	3.778
10.371506	3.59
10.390553	3.51
10.494463	3.668
10.455097	3.695
10.391291	3.666
10.350965	3.779
10.293929	3.719
10.275089	3.818
10.380627	3.77
10.543722	3.71
10.545409	3.804
10.532991	3.684
10.453759	3.759
10.484182	3.824
10.511696	3.605
10.47995	3.613
10.483096	3.613
10.608523	3.764
10.638664	3.72
10.587139	3.685
10.587826	3.606
10.570727	3.85
10.580754	3.798
10.635422	3.878
10.588336	3.897
10.588119	3.901
10.68506	3.93
10.584953	3.837
10.538679	3.896
10.533305	3.841
10.643821	3.615
10.671649	3.647
10.666374	3.69
10.585189	3.912
10.578785	3.703
10.547973	3.628
10.612991	3.642
10.555217	3.688
10.595616	3.599
10.613071	3.648
10.621353	3.632
10.656056	3.881
10.732092	3.948
10.576833	3.76
10.515517	3.844
10.619229	4.368
10.587497	4.032
10.523344	4.098
10.456687	3.877
10.573926	3.838
10.623426	3.789
10.547359	3.786
10.590156	3.79
10.652674	3.771
10.592446	3.872
10.509305	3.769
10.542905	3.771
10.600542	3.721
10.614724	3.632
10.587638	3.565
10.609237	3.525
10.588177	3.404
10.512957	3.422
10.534593	3.309
10.548981	3.475
10.490382	3.514
10.495414	3.41
10.509676	3.548
10.511771	3.495
10.554306	3.594
10.534561	3.592
10.548084	3.794
10.406239	3.595
10.466654	3.534
10.468967	3.627
10.590696	3.713
10.620288	3.477
10.607999	3.585
10.630156	3.667
10.632466	3.786
10.59266	3.715
10.569856	3.801
10.718558	3.897
10.647209	3.602
10.612795	3.787
10.678093	3.785
10.65071	3.873
10.659459	3.943
10.697488	3.938
10.632758	3.797
10.592019	3.807
10.615236	3.861
10.669765	4.008
10.648477	3.705
10.674931	3.768
10.571348	3.897
10.641921	3.91
10.668991	3.981
10.659413	3.789
10.612135	3.911
10.557876	3.94
10.558391	3.957
10.636443	3.894
10.600803	3.852
10.586156	3.888
10.637122	3.653
10.591605	3.751
10.638653	3.83
10.668133	3.851
10.684781	3.918
10.651702	3.832
10.667093	3.898
10.723898	3.85
10.775546	3.933
10.689312	3.982
10.672941	3.992
10.591267	3.811
10.536006	3.861
10.647563	3.76
10.653535	3.782
10.655706	3.803
10.667605	3.739
10.597464	3.743
10.606495	3.91
10.571197	3.966
10.630228	3.956
10.642454	3.859
10.698238	3.919
10.704199	3.867
10.745121	3.865
10.672719	3.847
10.703016	3.806
10.642182	3.837
10.65164	3.84
10.543668	3.939
10.664653	4.106
10.699363	3.924
10.661826	3.957
10.633624	4.009
10.633066	3.841
10.598234	4.01
10.612981	3.776
10.716716	3.835
10.711618	3.775
10.654277	3.893
10.691577	3.936
10.739609	4.073
10.736515	3.857
10.632473	3.851
10.655055	3.91
10.719952	3.818
10.638257	3.728
10.647316	3.918
10.588131	3.801
10.633569	3.846
10.588876	3.758
10.562937	3.737
10.609263	3.768
10.570071	3.991
10.62769	3.903
10.631208	3.894
10.673396	3.785
10.607997	3.77
10.601076	3.87
10.597463	3.877
10.610419	4.042
10.630253	3.823
10.629934	3.964
10.690844	3.949
10.665907	4.123
10.688916	3.943
10.596773	3.99
10.653922	3.982
10.733846	3.933
10.666291	3.997
10.689341	3.703
10.585993	3.685
10.671288	3.84
10.654751	3.873
10.698917	3.883
10.654035	3.982
10.631634	3.994
10.601712	3.913
10.541622	3.858
10.579414	3.813
10.668698	3.796
10.580576	3.874
10.545034	3.655
10.60379	3.764
10.551721	3.814
10.656148	3.949
10.708296	3.899
10.670149	3.796
10.674014	3.724
10.670467	3.811
10.660979	3.789
10.765055	3.782
10.708716	3.807
10.698307	3.962
10.676796	3.892
10.700948	3.857
10.661817	3.883
10.708595	4.028
10.732512	3.841
10.683315	3.783
10.687366	3.823
10.690681	3.774
10.740844	3.655
10.748943	3.876
10.718578	4.046
10.728997	3.892
10.746954	3.938
10.769295	3.886
10.819069	3.866
10.793727	3.891
10.767292	3.882
10.744683	3.837
10.731024	3.726
10.656768	3.803
10.652954	3.785
10.615891	3.757
10.700399	3.847
10.600275	3.763
10.70468	3.709
10.762083	3.691
10.744445	3.841
10.678741	3.89
10.643041	3.872
10.541903	3.76
10.533183	3.688
10.652141	3.883
10.629561	3.957
10.651999	3.983
10.672837	3.782
10.711038	3.998
10.722575	4.021
10.744149	3.813
10.699825	3.698
10.735077	3.82
9.625242	3.917
9.622412	4.454
9.704811	3.763
9.628693	3.765
9.643384	3.836
9.60815	3.82
9.648414	3.912
9.640201	3.992
9.667151	3.774
9.648772	3.645
9.646164	3.754
9.623279	3.606
9.657064	3.769
9.62352	3.572
9.620522	3.49
9.637644	3.725
9.653417	3.641
9.49954	3.862
9.50508	3.677
9.610877	3.512
9.566751	3.487
9.589503	3.385
9.584773	3.566
9.549962	3.522
9.476886	3.187
9.509971	3.33
9.553231	3.581
9.51649	3.513
9.623916	3.462
9.632325	3.341
9.573247	3.431
9.591568	3.492
9.573167	3.451
9.510832	3.669
9.580871	3.731
9.481123	3.7
9.610566	3.558
9.659654	3.633
9.463069	3.555
9.631744	3.572
9.640663	3.526
9.626211	3.544
9.693296	3.469
9.690789	3.2
9.653425	3.475
9.597303	3.472
9.669501	3.481
9.557287	3.288
9.592179	3.286
9.595641	3.323
9.616134	3.424
9.57184	3.45
9.590539	3.627
9.612088	3.843
9.636024	3.573
9.579216	3.617
9.66793	3.536
9.651103	3.419
9.655325	3.325
9.650754	3.402
9.642459	3.519
9.651996	3.562
9.690008	3.595
9.659822	3.535
9.682021	3.514
9.746265	3.328
9.583522	3.508
9.518769	3.642
9.647398	3.738
9.698859	3.6
9.739867	3.678
9.728525	3.718
9.659479	3.633
9.752707	3.624
9.649973	3.605
9.708176	3.598
9.683419	3.596
9.690309	3.495
9.610237	3.56
9.66353	3.412
9.668826	3.381
9.661995	3.415
9.649946	3.318
9.69773	3.361
9.64449	3.219
9.651437	3.147
9.705054	3.082
9.675136	3.145
9.732789	3.274
9.780873	3.258
9.661526	3.414
9.783111	3.272
9.680132	3.263
9.748251	3.347
9.616467	3.444
9.663764	3.287
9.608123	3.372
9.61963	3.57
9.621191	3.412
9.597769	3.476
9.638258	3.454
9.703311	3.368
9.647177	3.547
9.676931	3.262
9.610857	3.482
9.700105	3.547
9.661839	3.475
9.671488	3.963
9.691107	3.522
9.766002	3.783
9.665747	4.057
9.703656	3.743
9.775168	3.844
9.669922	3.942
9.72649	3.756
9.709056	4.12
9.755197	3.695
9.752811	3.753
9.797723	3.599
9.712309	4.315
9.729883	3.689
9.672672	3.615
9.705867	3.487
9.782941	3.468
9.74795	3.347
9.72666	3.267
9.765519	3.426
9.720137	3.28
9.751783	3.116
9.654214	3.15
9.713982	3.298
9.72662	3.159
9.702262	3.346
9.701468	3.293
9.601999	3.552
9.646625	3.585
9.640091	3.391
9.68957	3.601
9.680696	3.591
9.703421	3.671
9.737497	3.58
9.746532	3.534
9.83814	3.743
9.742173	3.631
9.68589	3.707
9.71581	3.596
9.786764	3.542
9.814344	3.562
9.733344	3.595
9.811425	3.454
9.843785	3.555
9.848751	3.433
9.843211	3.471
9.770203	3.326
9.755067	3.53
9.737661	3.342
9.789812	3.376
9.799681	3.433
9.646671	3.463
9.633459	3.458
9.773213	3.424
9.774104	3.216
9.694186	3.381
9.742321	3.309
9.715544	3.381
9.742141	3.357
9.709711	3.515
9.73233	3.563
9.807016	3.322
9.889118	3.688
9.7593	3.58
9.694398	3.546
9.708777	3.497
9.743089	3.256
9.736592	3.36
9.756145	3.422
9.827299	3.326
9.808935	3.329
9.830108	3.223
9.761987	3.066
9.744192	3.364
9.762013	3.546
9.723314	3.28
9.66736	3.445
9.652835	3.579
9.686763	3.58
9.788977	3.417
9.765513	3.409
9.79113	3.501
9.788066	3.419
9.657522	3.535
9.731456	3.385
9.695641	3.453
9.731253	3.623
9.739053	3.542
9.71628	3.608
9.699278	3.754
9.734895	3.792
9.691185	3.496
9.734792	3.701
9.799223	3.451
9.814109	3.58
9.748752	3.551
9.792271	3.667
9.801911	3.499
9.725004	3.444
9.77229	3.436
9.769365	3.237
9.845128	3.299
9.756464	3.387
9.786717	3.407
9.884035	3.376
9.865968	3.248
9.743485	3.26
9.803004	3.337
9.767708	3.405
9.725065	3.435
9.83897	3.365
9.821298	3.283
9.802834	3.463
9.786917	3.512
9.798007	3.549
9.775368	3.25
9.77308	3.205
9.808048	3.338
9.737586	3.288
9.769567	3.192
9.749152	3.268
9.772545	3.204
9.801864	3.356
9.805833	3.319
9.920819	3.513
9.808009	3.497
9.814008	3.632
9.847437	3.403
9.805265	3.457
9.811501	3.462
9.831329	3.469
9.81646	3.553
9.788138	3.337
9.862302	3.452
9.896388	3.504
9.913156	3.27
9.8615	3.47
9.899397	3.33
9.834607	3.269
9.860011	3.295
9.853874	3.175
9.869341	3.418
9.859517	3.28
9.810156	3.393
9.872858	3.336
9.858618	3.275
9.923876	3.41
9.935199	3.309
9.919005	3.48
9.857	3.659
9.732385	3.425
9.853146	3.504
9.87825	3.447
9.894685	3.325
9.829533	3.373
9.861537	3.355
9.833183	3.502
9.830699	3.448
9.816042	3.344
9.800905	3.49
9.741003	3.322
9.753336	3.32
9.898852	3.39
9.804924	3.242
9.877895	3.286
9.864523	3.295
9.810166	3.362
9.810035	3.258
9.86598	3.204
9.863661	3.281
9.891859	3.203
9.882643	3.284
9.973754	3.323
9.825206	3.337
9.881602	3.594
9.876613	3.405
9.866033	3.553
9.863378	3.34
9.836738	3.372
9.84905	3.488
9.862453	3.42
9.879899	3.401
9.878352	3.374
9.851239	3.556
9.876063	3.428
9.943266	3.513
9.999848	3.618
9.932294	3.57
9.983692	3.616
9.927063	3.619
9.9175	3.594
9.81402	3.549
9.903712	3.572
9.077165	3.473
9.099063	3.628
9.183217	3.442
9.072755	3.808
9.034149	3.901
9.043928	3.505
9.018841	3.209
9.045604	3.144
9.133784	3.432
9.047565	3.277
9.001643	3.058
9.080599	2.867
9.142741	2.928
9.113777	3.123
9.072458	3.216
9.077863	2.941
9.126285	3.184
9.14623	3.414
9.122751	3.29
9.053884	3.367
9.096588	3.321
9.162238	3.282
9.055839	3.041
9.05996	2.966
9.094229	2.957
9.0581	2.886
9.081877	2.681
9.107769	3.08
9.090074	3.012
9.104471	3.077
9.034224	2.793
9.100964	2.919
9.012392	2.696
9.083544	2.963
9.126461	2.947
9.156242	3.006
9.082973	3.075
9.024098	3.059
9.115075	3.012
9.007334	2.798
9.015002	2.601
9.027634	2.647
9.173776	2.519
9.096359	2.488
9.108249	2.445
9.131862	2.511
9.061634	2.236
9.120668	2.489
9.13477	2.391
9.142502	2.41
9.025236	2.159
9.012352	2.054
9.064462	2.105
9.043549	2.109
9.081376	2.203
9.110153	2.425
9.147224	2.215
9.124991	1.982
9.033222	1.978
9.083164	2.106
9.088405	2.196
8.988067	1.975
9.057466	1.823
9.036076	2.068
9.023186	1.884
9.026651	1.74
9.139629	2.058
9.101413	1.786
9.093274	1.982
9.073686	1.969
9.071874	2.062
9.068611	1.839
9.144973	1.66
9.061011	1.762
9.040471	2.072
9.135124	1.991
9.184896	1.907
9.162443	2.215
9.183374	2.255
9.118524	1.999
9.121637	1.956
9.105624	2.441
9.16598	2.047
9.110858	2.172
9.146412	2.084
9.108425	1.923
9.200126	2.431
9.074418	2.315
9.128935	3.633
9.1502	2.472
9.200032	2.448
9.129797	2.495
9.154199	2.211
9.185034	3.795
9.15168	2.434
9.160019	2.283
9.119621	1.944
9.257911	2.207
9.203555	2.304
9.150872	2.468
9.180226	2.281
9.104989	2.27
9.105948	2.377
9.162015	2.236
9.141794	2.408
9.147988	2.603
9.247853	2.377
9.217153	2.187
9.223071	2.522
9.152767	4.045
9.15166	2.167
9.201674	2.154
9.134676	2.366
9.194209	3.856
9.177908	1.995
9.167268	2.129
9.151265	3.659
9.158896	2.279
9.243202	1.847
9.188099	2.202
9.110545	2.293
9.087826	2
9.066462	2.193
9.118875	2.215
9.18355	3.55
9.216438	2.276
9.227678	2.503
9.167844	2.006
9.214532	2
9.236536	2.31
9.244019	2.306
9.226339	2.372
9.208553	2.364
9.25244	2.253
9.238647	2.229
9.209187	2.229
9.210144	2.518
9.240346	2.257
9.160263	2.012
9.231668	2.066
9.138174	2.152
9.201335	2.213
9.223321	2.226
9.229561	1.959
9.203957	1.866
9.205258	2.258
9.240256	2.172
9.217741	1.752
9.278302	1.998
9.210626	2.16
9.256952	2.117
9.21986	2.215
9.172696	2.262
9.193128	2.377
9.190881	2.214
9.248664	2.309
9.197475	2.415
9.111945	2.043
9.119165	2.368
9.061168	1.992
9.171362	1.784
9.192259	2.004
9.144126	2.144
9.115808	2.115
9.194404	1.94
9.169123	1.824
9.178579	1.822
9.201679	1.735
9.167955	1.862
9.191741	1.711
9.231886	1.631
9.173102	1.684
9.181019	1.595
9.280002	1.356
9.178193	1.412
9.267948	1.421
9.194655	1.564
9.174611	1.71
9.169988	1.866
9.194068	1.5
9.241371	1.474
9.261096	1.708
9.299621	1.81
9.275946	1.843
9.270927	1.709
9.261936	1.653
9.177706	1.703
9.178217	1.919
9.142223	1.857
9.156223	1.961
9.156618	1.86
9.224598	1.656
9.145492	1.689
9.164219	2.013
9.236575	1.739
9.179897	1.925
9.225461	1.716
9.193425	1.643
9.236618	1.698
9.214889	1.933
9.294806	3.787
9.246879	1.792
9.212863	1.819
9.183906	1.862
9.179587	1.805
9.121349	1.777
9.1528	1.844
9.137032	2.251
9.114495	2.088
9.255757	1.854
9.158029	2.161
9.197109	2.378
9.20651	2.307
9.23403	2.532
9.198382	2.301
9.287394	2.391
9.211054	2.418
9.189912	2.291
9.189435	2.237
9.216093	2.088
9.234425	2.206
9.246538	2.135
9.226662	2.381
9.235276	2.16
9.211597	2.045
9.272246	1.935
9.195573	2.05
9.243561	2.068
9.148063	2.115
9.215055	2.136
9.271022	2.234
9.288494	2.232
9.339717	2.099
9.327173	2.297
9.337422	2.149
9.264266	2.01
9.282599	1.998
9.334484	2.026
9.342202	1.939
9.341145	2.03
9.337313	2.438
9.395841	2.428
9.368078	2.033
9.323581	1.816
9.310922	2.494
9.322837	2.241
9.322886	2.234
9.222172	2.328
9.208474	2.432
9.306316	2.351
9.407603	2.272
9.302782	2.175
9.319809	2.507
9.307799	2.522
9.306819	2.632
9.283429	2.602
9.29006	2.54
9.319784	2.039
9.278912	2.154
9.356247	1.872
9.258068	2.233
9.301211	3.81
9.223609	3.626
9.274391	2.127
9.181124	3.802
9.277418	3.596
9.274294	2.308
9.268259	2.262
9.355678	2.195
9.243398	2.217
9.305371	1.948
9.287164	2.298
9.298144	1.707
9.26828	1.733
9.320478	1.93
9.278975	2.076
9.278599	2.215
9.217773	1.957
9.226298	2.009
9.26198	1.993
9.294988	1.921
9.329146	2.037
9.306529	1.721
9.249321	1.794
9.273888	2.079
9.331746	2.229
9.297736	2.33
9.273998	2.077
9.218636	2.24
9.321843	1.908
9.231422	1.906
9.298299	1.929
9.333372	1.996
9.227402	1.912
9.211789	1.897
9.277191	2.253
9.294775	1.863
9.304895	
9.258841	
9.308732	
8.400989	
8.310941	
8.310878	
8.314821	
8.275941	
8.265842	
8.305474	
8.318565	
8.293285	
8.285067	
8.311286	
8.268767	
8.267183	
8.262522	
8.23804	
8.252155	
8.28124	
8.340722	
8.220678	
8.266823	
8.254751	
8.36522	
8.288582	
8.289685	
8.282055	
8.300984	
8.253381	
8.279085	
8.33579	
8.245418	
8.278055	
8.212552	
8.314319	
8.420049	
8.359638	
8.292105	
8.332967	
8.321344	
8.116027	
8.156523	
8.162522	
8.139148	
8.29703	
8.335185	
8.270432	
8.207174	
8.243372	
8.248695	
8.388683	
8.260605	
8.258267	
8.301301	
8.281356	
8.217657	
8.280297	
8.334068	
8.212755	
8.26259	
8.357422	
8.208463	
8.307094	
8.257055	
8.169345	
8.234308	
8.184976	
8.287005	
8.199235	
8.303015	
8.235545	
8.300429	
8.299472	
8.260237	
8.285747	
8.250716	
8.252075	
8.295942	
8.314483	
8.223673	
8.258889	
8.237698	
8.238662	
8.270862	
8.162466	
8.201336	
8.209734	
8.388966	
8.200677	
8.179776	
8.266391	
8.321084	
8.322261	
8.33048	
8.248912	
8.255802	
8.316927	
8.293638	
8.302366	
8.199769	
8.137784	
8.203809	
8.157174	
8.136782	
8.253584	
8.288236	
8.399903	
8.294138	
8.327686	
8.168106	
8.254265	
8.211366	
8.235219	
8.28521	
8.197547	
8.223732	
8.206894	
8.235409	
8.246389	
8.250277	
8.34023	
8.304984	
8.297582	
8.240604	
8.322671	
8.2111	
8.260026	
8.231206	
8.322341	
8.351301	
8.285802	
8.358934	
8.333098	
8.373592	
8.278723	
8.366976	
8.263179	
8.313371	
8.266329	
8.22683	
8.28744	
8.266426	
8.283853	
8.330954	
8.326032	
8.242287	
8.285262	
8.310056	
8.308256	
8.425698	
8.288976	
8.225283	
8.283808	
8.243695	
8.243267	
8.286572	
8.309401	
8.297182	
8.347555	
8.310176	
8.367721	
8.312103	
8.263301	
8.311617	
8.365005	
8.287866	
8.319342	
8.332657	
8.303254	
8.259283	
8.240401	
8.290172	
8.324702	
8.254665	
8.25008	
8.268982	
8.290308	
8.228672	
8.217907	
8.265235	
8.360566	
8.356241	
8.33851	
8.230901	
8.335499	
8.303498	
8.292745	
8.239583	
8.323398	
8.299205	
8.302118	
8.288236	
8.261794	
8.274594	
8.281053	
8.321393	
8.327354	
8.301413	
8.288195	
8.307402	
8.289523	
8.25295	
8.311913	
8.301362	
8.299685	
8.349723	
8.324513	
8.203684	
8.198882	
8.201108	
8.243347	
8.230347	
8.296335	
8.207451	
8.226073	
8.22876	
8.211917	
8.22067	
8.208976	
8.186199	
8.172762	
8.139113	
8.218887	
8.248866	
8.330922	
8.285085	
8.233838	
8.144674	
8.203136	
8.179224	
8.118464	
8.084348	
8.25	
8.295985	
8.211368	
8.176624	
8.158903	
8.131396	
8.226253	
8.132866	
8.122771	
8.199998	
8.069019	
8.110477	
8.062499	
8.068205	
7.997986	
8.025955	
7.961774	
7.959229	
8.024943	
8.124864	
8.129038	
8.200191	
8.168438	
8.062732	
8.107546	
8.090875	
8.037471	
8.104722	
8.128619	
8.024909	
7.948004	
8.047711	
8.086918	
8.053471	
8.023019	
8.029602	
8.074048	
8.093558	
7.989011	
8.064531	
7.991398	
8.004887	
7.998207	
8.071982	
8.163853	
8.183979	
8.008286	
8.058317	
8.17086	
8.074985	
8.101126	
7.999857	
7.952991	
7.887295	
8.053794	
8.068369	
8.029595	
8.147987	
8.115073	
8.110669	
8.006839	
8.017525	
8.036302	
8.015053	
8.194459	
8.10015	
8.00773	
8.116524	
8.182712	
8.144885	
8.200158	
7.704218	
7.686324	
7.711769	
7.664879	
7.679948	
7.735239	
7.726435	
7.695755	
7.701006	
7.647623	
7.693019	
7.67668	
7.745238	
7.756378	
7.688002	
7.72387	
7.689393	
7.686146	
7.698363	
7.637914	
7.624099	
7.710072	
7.741278	
7.694798	
7.674511	
7.645949	
7.674325	
7.634083	
7.684101	
7.757545	
7.681652	
7.662721	
7.709449	
7.685698	
7.709634	
7.703357	
7.694943	
7.675005	
7.723855	
7.656216	
7.715234	
7.704692	
7.637741	
7.769679	
7.645909	
7.666359	
7.679842	
7.763372	
7.682331	
7.768698	
7.76837	
7.706369	
7.771307	
7.668361	
7.63799	
7.573897	
7.710386	
7.640757	
7.680957	
7.682252	
7.594225	
7.594576	
7.670456	
7.68209	
7.670483	
7.633756	
7.673291	
7.747059	
7.722911	
7.73062	
7.769341	
7.760093	
7.698156	
7.73754	
7.627899	
7.727344	
7.741941	
7.634835	
7.666359	
7.601137	
7.700173	
7.5886	
7.646673	
7.715923	
7.569617	
7.625607	
7.668761	
7.635308	
7.650888	
7.670839	
7.67552	
7.538678	
7.716367	
7.633597	
7.639103	
7.618401	
7.667966	
7.549334	
7.696063	
7.630978	
7.565699	
7.53287	
7.569376	
7.613181	
7.58504	
7.529825	
7.662553	
7.52006	
7.5607	
7.595837	
7.514049	
7.591399	
7.671195	
7.604842	
7.604048	
7.642382	
7.5578	
7.623734	
7.590569	
7.661503	
7.568545	
7.605499	
7.604164	
7.701485	
7.641848	
7.526866	
7.637503	
7.540826	
7.501198	
7.580242	
7.605755	
7.615827	
7.633295	
7.609519	
7.705167	
7.569765	
7.586664	
7.658111	
7.603836	
7.670214	
7.638003	
7.602147	
7.741198	
7.681952	
7.749866	
7.640965	
7.604371	
7.643239	
7.654931	
7.704345	
7.643452	
7.699624	
7.630497	
7.570456	
7.645711	
7.716571	
7.634725	
7.676579	
7.629142	
7.721052	
7.652461	
7.682154	
7.691876	
7.61968	
7.632322	
7.650418	
7.619493	
7.641279	
7.726158	
7.751777	
7.658643	
7.680634	
7.620773	
7.668816	
7.716524	
7.645187	
7.693827	
7.649089	
7.588773	
7.575746	
7.63398	
7.606636	
7.639417	
7.614157	
7.655238	
7.588436	
7.514703	
7.64358	
7.652247	
7.569774	
7.622104	
7.633906	
7.695385	
7.597311	
7.699628	
7.700193	
7.650469	
7.573148	
7.634974	
7.665163	
7.66568	
7.57708	
7.643808	
7.621199	
7.583159	
7.585342	
7.666916	
7.652335	
7.55017	
7.618342	
7.699028	
7.678204	
7.654393	
7.66444	
7.608213	
7.584612	
7.589505	
7.551758	
7.582555	
7.645421	
7.666409	
7.61005	
7.650458	
7.679347	
7.679121	
7.65823	
7.681265	
7.636419	
7.639685	
7.652458	
7.608884	
7.660593	
7.683041	
7.686536	
7.599244	
7.577131	
7.58777	
7.650903	
7.699812	
7.688815	
7.65628	
7.584719	
7.572464	
7.626483	
7.606318	
7.647001	
7.604332	
7.549076	
7.554749	
7.597926	
7.584579	
7.645732	
7.619173	
7.617117	
7.629475	
7.681905	
7.62809	
7.681332	
7.567748	
7.609795	
7.560967	
7.582604	
7.556408	
7.661133	
7.597106	
7.658699	
7.635265	
7.620501	
7.603884	
7.587721	
7.599416	
7.635532	
7.599074	
7.600584	
7.651257	
7.624176	
7.597201	
7.669449	
7.616019	
7.601632	
7.598279	
7.587563	
7.624333	
7.654556	
7.597187	
7.628749	
7.643792	
7.583097	
7.555177	
7.561083	
7.622104	
7.533107	
7.566719	
7.489465	
7.495266	
7.487872	
7.60456	
7.568405	
7.636894	
7.505319	
7.562413	
	
