# Supplementary material for: The role of scaffold reshaping and disassembly in dynamin driven membrane fission
Source: eLife journal article supplement (doi:10.7554/elife.39441), 2018-12-18
Supplement: supp [file elife-39441-supp-v1.zip › elife_poa_e39441_Figure_3_source_data_1.txt]

#  DATA FILE for Fig. 3 in the paper
#
#      "The role of scaffold reshaping and disassembly
#       in dynamin driven membrane fission"
#
#  by Martina Pannuzzo, Zachary A. McDargh, and Markus Deserno
#
#  published in eLife
#
#  -------------------------------------------------------------
#  Neck radius change upon successive changes in the interaction
#  between scaffold and enclosed membrane:
#  1) constriction, from R=10.5 to R=10, at t ~ 600 tau
#  2) turn off adhesion to scaffold, at t ~ 1300 tau
#  3) disassemby of scaffold, at t ~ 2200 tau 
#  -------------------------------------------------------------
#  
#  Column 1: t  ((shifted) time of simulation, in units of tau)
#  Column 2: Rg (gyration radius of neck, in units of sigma)
#  
0	4.461
1	4.45
2	4.54
3	4.654
4	4.567
5	4.564
6	4.367
7	4.432
8	4.562
9	4.152
10	4.318
11	4.358
12	4.134
13	4.131
14	4.162
15	4.094
16	4.063
17	4.015
18	4.188
19	4.079
20	4.237
21	4.055
22	4.059
23	4.06
24	4.116
25	4.166
26	4.123
27	4.119
28	4.193
29	3.958
30	3.937
31	3.971
32	4.073
33	4.139
34	4.347
35	4.427
36	4.326
37	4.322
38	4.276
39	4.32
40	4.454
41	4.294
42	4.266
43	4.378
44	4.335
45	4.309
46	4.385
47	4.387
48	4.308
49	4.247
50	4.176
51	4.274
52	4.481
53	4.409
54	4.334
55	4.276
56	4.128
57	4.438
58	4.34
59	4.348
60	4.351
61	4.397
62	4.315
63	4.309
64	4.373
65	4.275
66	4.222
67	4.215
68	4.137
69	4.213
70	4.146
71	4.285
72	4.116
73	4.203
74	4.297
75	4.242
76	4.426
77	4.386
78	4.368
79	4.218
80	4.325
81	4.097
82	4.096
83	4.175
84	4.124
85	4.005
86	4.302
87	4.331
88	4.212
89	4.304
90	4.217
91	4.069
92	4.144
93	4.314
94	4.38
95	4.199
96	4.113
97	4.218
98	4.262
99	4.128
100	4.093
101	4.19
102	4.212
103	4.178
104	4.07
105	3.989
106	3.945
107	4.129
108	3.928
109	4.211
110	4.021
111	4.025
112	4.118
113	4.029
114	4.189
115	4.012
116	3.942
117	3.901
118	3.853
119	3.8
120	3.945
121	3.951
122	3.823
123	3.858
124	3.946
125	3.747
126	3.837
127	4.055
128	3.924
129	4.053
130	4.03
131	3.892
132	3.851
133	3.878
134	4.075
135	4.034
136	4.031
137	4.02
138	4.03
139	4.103
140	3.941
141	3.858
142	3.956
143	4.056
144	4.071
145	3.871
146	4.101
147	4.148
148	4.17
149	4.222
150	4.21
151	4.237
152	4.229
153	4.423
154	4.366
155	4.27
156	4.279
157	4.299
158	4.284
159	4.473
160	4.218
161	4.219
162	4.359
163	4.156
164	4.278
165	4.076
166	3.984
167	4.322
168	4.234
169	4.232
170	4.315
171	4.366
172	4.322
173	4.423
174	4.471
175	4.374
176	4.337
177	4.138
178	4.257
179	4.377
180	4.466
181	4.543
182	4.494
183	4.538
184	4.378
185	4.434
186	4.345
187	4.447
188	4.446
189	4.425
190	4.337
191	4.376
192	4.462
193	4.364
194	4.293
195	4.192
196	4.324
197	4.309
198	4.037
199	4.114
200	4.332
201	4.279
202	4.368
203	4.363
204	4.336
205	4.434
206	4.307
207	4.321
208	4.282
209	4.312
210	4.175
211	4.135
212	4.393
213	4.11
214	4.335
215	4.376
216	4.367
217	4.299
218	4.368
219	4.119
220	4.167
221	4.242
222	4.244
223	4.093
224	3.832
225	3.972
226	4.089
227	3.989
228	4.127
229	4.055
230	4.072
231	4.244
232	4.235
233	4.077
234	4.193
235	4.007
236	4.079
237	3.999
238	4.027
239	4.212
240	4.172
241	4.342
242	4.294
243	4.444
244	4.324
245	4.202
246	4.279
247	4.31
248	4.213
249	3.978
250	3.986
251	3.952
252	3.891
253	3.831
254	3.897
255	3.841
256	3.974
257	3.934
258	3.94
259	4.208
260	4.196
261	4.281
262	4.16
263	4.161
264	4.261
265	4.183
266	4.041
267	4.154
268	4.111
269	4.314
270	4.068
271	4.162
272	4.183
273	4.222
274	4.247
275	4.214
276	4.176
277	4.266
278	4.4
279	4.268
280	4.362
281	4.329
282	4.407
283	4.257
284	4.237
285	4.233
286	4.223
287	4.317
288	4.396
289	4.263
290	4.382
291	4.217
292	4.212
293	4.261
294	4.284
295	4.294
296	4.025
297	4.268
298	4.28
299	4.248
300	4.242
301	4.173
302	4.25
303	4.162
304	3.979
305	4.063
306	3.997
307	4.03
308	3.811
309	3.813
310	3.834
311	3.822
312	3.93
313	3.881
314	3.813
315	3.992
316	4.043
317	4.163
318	4.304
319	4.103
320	4.16
321	4.167
322	4.298
323	4.458
324	4.35
325	4.418
326	4.458
327	4.292
328	4.391
329	4.133
330	4.126
331	4.399
332	4.173
333	4.042
334	4.161
335	4.296
336	4.193
337	4.085
338	4.045
339	4.023
340	4.049
341	3.988
342	3.998
343	4.023
344	4.195
345	4.184
346	4.054
347	3.952
348	3.934
349	4.029
350	4.036
351	4
352	3.958
353	4.021
354	4.061
355	4.124
356	4.123
357	4.152
358	4.278
359	4.146
360	4.226
361	4.154
362	4.224
363	4.359
364	4.555
365	4.455
366	4.498
367	4.439
368	4.193
369	4.283
370	4.311
371	4.39
372	4.224
373	4.281
374	4.305
375	4.152
376	4.137
377	4.144
378	4.114
379	4.124
380	4.239
381	4.322
382	4.316
383	4.143
384	4.088
385	4.294
386	4.038
387	4.128
388	4.274
389	4.282
390	4.26
391	4.297
392	4.45
393	4.387
394	4.234
395	4.076
396	4.196
397	4.346
398	4.249
399	4.258
400	4.133
401	4.132
402	4.063
403	3.987
404	4.211
405	4.042
406	4.083
407	3.94
408	3.886
409	3.776
410	3.881
411	3.906
412	3.821
413	3.88
414	4.05
415	3.811
416	3.663
417	3.722
418	3.75
419	4.004
420	4.07
421	4.015
422	4
423	3.964
424	4.056
425	4.253
426	4.069
427	4.083
428	3.962
429	4.341
430	4.322
431	4.296
432	4.322
433	4.298
434	4.37
435	4.493
436	4.453
437	4.436
438	4.364
439	4.512
440	4.365
441	4.212
442	4.105
443	4.18
444	4.255
445	4.311
446	4.429
447	4.393
448	4.419
449	4.088
450	4.121
451	4.234
452	4.208
453	4.427
454	4.212
455	4.377
456	4.154
457	4.316
458	4.195
459	4.229
460	4.278
461	4.357
462	4.25
463	4.315
464	4.366
465	4.479
466	4.457
467	4.481
468	4.419
469	4.249
470	4.35
471	4.481
472	4.18
473	4.27
474	4.325
475	4.288
476	4.416
477	4.165
478	4.138
479	3.954
480	4.16
481	3.902
482	4.112
483	4.107
484	4.021
485	4.179
486	4.253
487	4.273
488	4.118
489	3.927
490	3.937
491	3.832
492	4.077
493	4.161
494	4.239
495	4.305
496	4.126
497	4.292
498	4.28
499	4.234
500	4.197
501	4.046
502	4.223
503	4.248
504	4.19
505	4.216
506	4.054
507	4.243
508	4.325
509	4.057
510	3.979
511	4.19
512	4.036
513	4.148
514	4.137
515	4.114
516	4.27
517	4.382
518	4.262
519	4.418
520	4.218
521	4.175
522	4.13
523	4.088
524	4.25
525	4.216
526	4.206
527	4.115
528	4.178
529	4.372
530	4.286
531	4.266
532	4.402
533	4.366
534	4.329
535	4.223
536	4.084
537	4.346
538	4.126
539	4.239
540	4.352
541	4.249
542	4.259
543	4.409
544	4.545
545	4.264
546	4.282
547	4.241
548	4.183
549	4.103
550	3.996
551	4.321
552	4.212
553	4.293
554	4.369
555	4.226
556	4.163
557	4.257
558	4.137
559	4.242
560	4.26
561	4.432
562	4.38
563	4.35
564	4.292
565	4.29
566	4.386
567	4.205
568	4.429
569	4.218
570	4.133
571	4.17
572	4.203
573	4.23
574	4.107
575	4.001
576	4.115
577	4.076
578	3.926
579	3.995
580	4.057
581	3.965
582	3.933
583	3.914
584	4.038
585	4.074
586	4.145
587	4.034
588	4.102
589	4.12
590	3.759
591	3.853
592	3.708
593	3.853
594	3.731
595	3.688
596	3.597
597	3.844
598	3.722
599	4.536
600	4.493
601	4.37
602	4.421
603	4.427
604	4.327
605	4.17
606	4.099
607	4.321
608	4.273
609	4.26
610	4.353
611	4.086
612	4.1
613	4.171
614	4.069
615	4.109
616	4.006
617	3.844
618	4.044
619	4.072
620	4.024
621	4.01
622	3.883
623	3.871
624	4.014
625	3.89
626	3.999
627	3.724
628	3.824
629	3.877
630	3.824
631	3.844
632	3.831
633	3.914
634	3.924
635	3.847
636	3.804
637	3.701
638	3.666
639	3.809
640	3.749
641	3.995
642	4.107
643	4.243
644	3.985
645	4
646	4.033
647	3.869
648	3.826
649	3.928
650	3.793
651	3.73
652	3.701
653	3.631
654	3.69
655	3.622
656	3.638
657	3.704
658	3.512
659	3.847
660	3.722
661	3.744
662	3.822
663	3.629
664	3.558
665	3.711
666	3.732
667	3.71
668	3.818
669	3.756
670	3.858
671	3.816
672	3.753
673	3.85
674	3.725
675	3.799
676	3.864
677	3.654
678	3.66
679	3.659
680	3.81
681	3.764
682	3.73
683	3.658
684	3.888
685	3.839
686	3.919
687	3.943
688	3.946
689	3.977
690	3.882
691	3.941
692	3.882
693	3.661
694	3.681
695	3.732
696	3.954
697	3.749
698	3.672
699	3.688
700	3.73
701	3.643
702	3.697
703	3.682
704	3.924
705	3.989
706	3.805
707	3.88
708	3.892
709	4.065
710	4.138
711	3.917
712	3.876
713	3.834
714	3.834
715	3.833
716	3.82
717	3.913
718	3.818
719	3.813
720	3.766
721	3.678
722	3.61
723	3.57
724	3.453
725	3.47
726	3.358
727	3.523
728	3.558
729	3.451
730	3.59
731	3.543
732	3.641
733	3.638
734	3.845
735	3.644
736	3.579
737	3.671
738	3.753
739	3.52
740	3.629
741	3.71
742	3.833
743	3.757
744	3.843
745	3.938
746	3.648
747	3.837
748	3.829
749	3.924
750	3.98
751	3.981
752	3.833
753	3.85
754	3.907
755	4.046
756	3.75
757	3.81
758	3.939
759	3.952
760	4.016
761	3.827
762	3.952
763	3.981
764	3.995
765	3.942
766	3.895
767	3.931
768	3.7
769	3.798
770	3.875
771	3.889
772	3.96
773	3.883
774	3.935
775	3.892
776	3.973
777	4.027
778	4.033
779	3.857
780	3.904
781	3.802
782	3.834
783	3.844
784	3.786
785	3.792
786	3.95
787	4.005
788	3.999
789	3.898
790	3.957
791	3.908
792	3.908
793	3.892
794	3.847
795	3.876
796	3.882
797	3.983
798	4.142
799	3.969
800	4.003
801	4.054
802	3.885
803	4.048
804	3.82
805	3.875
806	3.817
807	3.937
808	3.974
809	4.11
810	3.895
811	3.89
812	3.944
813	3.86
814	3.775
815	3.961
816	3.848
817	3.887
818	3.807
819	3.788
820	3.811
821	4.035
822	3.947
823	3.935
824	3.83
825	3.814
826	3.918
827	3.922
828	4.08
829	3.869
830	4.003
831	3.992
832	4.156
833	3.979
834	4.031
835	4.028
836	3.973
837	4.037
838	3.745
839	3.723
840	3.886
841	3.911
842	3.926
843	4.023
844	4.036
845	3.955
846	3.908
847	3.856
848	3.843
849	3.915
850	3.7
851	3.813
852	3.852
853	3.992
854	3.943
855	3.84
856	3.773
857	3.86
858	3.828
859	3.828
860	3.853
861	4.003
862	3.932
863	3.9
864	3.922
865	4.069
866	3.878
867	3.823
868	3.871
869	3.819
870	3.702
871	3.923
872	4.087
873	3.935
874	3.981
875	3.928
876	3.908
877	3.931
878	3.921
879	3.878
880	3.771
881	3.844
882	3.829
883	3.8
884	3.884
885	3.81
886	3.753
887	3.736
888	3.887
889	3.933
890	3.909
891	3.802
892	3.73
893	3.927
894	3.999
895	4.025
896	3.821
897	4.039
898	4.06
899	4.055
900	3.961
901	4.115
902	4.112
903	3.841
904	4.088
905	4.065
906	4.01
907	3.887
908	3.845
909	3.94
910	3.703
911	3.974
912	3.817
913	3.806
914	3.907
915	3.891
916	3.939
917	3.992
918	3.627
919	3.918
920	3.82
921	3.941
922	3.833
923	3.982
924	4.051
925	3.934
926	3.892
927	3.875
928	3.749
929	3.803
930	3.821
931	3.938
932	3.874
933	3.867
934	3.871
935	3.802
936	3.638
937	3.555
938	3.659
939	3.507
940	3.621
941	3.521
942	3.526
943	3.51
944	3.522
945	3.552
946	3.593
947	3.558
948	3.496
949	3.658
950	3.582
951	3.629
952	3.751
953	3.725
954	3.82
955	3.875
956	3.85
957	3.722
958	3.85
959	4.032
960	3.954
961	3.958
962	4.134
963	3.85
964	3.997
965	3.975
966	3.855
967	3.868
968	3.997
969	3.725
970	3.794
971	3.891
972	3.783
973	3.72
974	3.794
975	3.733
976	3.661
977	3.753
978	3.95
979	3.85
980	4.035
981	3.912
982	4.096
983	4.076
984	4.081
985	4.17
986	3.935
987	4.031
988	4.051
989	3.853
990	3.886
991	3.943
992	4.067
993	4.074
994	4.262
995	4.151
996	4.031
997	4.117
998	3.892
999	4.015
1000	3.954
1001	3.888
1002	3.839
1003	4.019
1004	3.857
1005	4.009
1006	3.985
1007	4.051
1008	4.116
1009	3.92
1010	3.827
1011	3.939
1012	3.91
1013	3.872
1014	3.833
1015	3.825
1016	4.074
1017	3.792
1018	3.897
1019	3.792
1020	3.871
1021	3.918
1022	3.869
1023	4.063
1024	3.747
1025	3.836
1026	4.104
1027	3.86
1028	3.808
1029	3.752
1030	4.023
1031	3.814
1032	3.863
1033	3.771
1034	3.932
1035	3.83
1036	3.859
1037	3.931
1038	3.861
1039	3.727
1040	3.715
1041	3.804
1042	3.773
1043	3.85
1044	3.775
1045	3.736
1046	3.687
1047	3.763
1048	3.67
1049	3.582
1050	3.819
1051	3.609
1052	3.679
1053	3.811
1054	3.82
1055	3.772
1056	3.802
1057	3.916
1058	4.193
1059	3.982
1060	3.893
1061	3.998
1062	3.963
1063	4.224
1064	3.94
1065	4.073
1066	4.158
1067	3.941
1068	4.02
1069	4.094
1070	3.924
1071	4
1072	3.93
1073	3.907
1074	4.253
1075	4.224
1076	4.264
1077	4.081
1078	4.033
1079	4.133
1080	4.252
1081	4.161
1082	4.09
1083	4.062
1084	3.964
1085	4.185
1086	3.978
1087	3.923
1088	4.117
1089	4.214
1090	4.239
1091	3.962
1092	3.844
1093	3.96
1094	3.827
1095	3.927
1096	3.837
1097	3.908
1098	3.691
1099	3.874
1100	4.053
1101	4.007
1102	3.949
1103	4.075
1104	3.953
1105	3.994
1106	3.887
1107	4.182
1108	3.939
1109	3.997
1110	3.897
1111	3.678
1112	3.743
1113	3.78
1114	3.846
1115	3.771
1116	3.776
1117	3.856
1118	4.067
1119	3.999
1120	4.034
1121	4.154
1122	3.959
1123	3.888
1124	4.139
1125	4.258
1126	4.037
1127	3.975
1128	4.112
1129	4.032
1130	4.046
1131	4.266
1132	4.182
1133	4.203
1134	4.181
1135	4.197
1136	4.209
1137	3.979
1138	4.105
1139	4.145
1140	4.171
1141	4.152
1142	4.127
1143	4.161
1144	4.219
1145	4.137
1146	4.08
1147	3.976
1148	3.975
1149	3.917
1150	3.941
1151	3.959
1152	4.212
1153	4.221
1154	3.991
1155	4.054
1156	3.937
1157	3.94
1158	3.777
1159	3.885
1160	4.054
1161	3.915
1162	3.797
1163	3.817
1164	3.801
1165	3.818
1166	3.803
1167	3.863
1168	3.719
1169	3.86
1170	3.775
1171	3.783
1172	3.661
1173	3.789
1174	4.013
1175	4.048
1176	4.002
1177	4.143
1178	3.915
1179	3.928
1180	3.919
1181	3.985
1182	4.055
1183	3.912
1184	3.972
1185	4.086
1186	3.873
1187	3.965
1188	3.786
1189	3.727
1190	3.769
1191	3.925
1192	3.718
1193	3.658
1194	3.739
1195	3.75
1196	3.89
1197	3.801
1198	3.979
1199	3.855
1200	3.855
1201	3.964
1202	4.233
1203	3.933
1204	3.957
1205	3.858
1206	3.961
1207	3.807
1208	4.017
1209	3.842
1210	3.907
1211	3.953
1212	3.9
1213	3.906
1214	3.9
1215	3.868
1216	3.889
1217	3.699
1218	3.797
1219	3.692
1220	3.792
1221	3.816
1222	3.835
1223	3.842
1224	3.824
1225	3.972
1226	3.751
1227	3.87
1228	3.906
1229	4.055
1230	3.905
1231	3.809
1232	4.067
1233	4.238
1234	3.959
1235	4.031
1236	4.155
1237	3.961
1238	4.033
1239	4.069
1240	4.037
1241	4.101
1242	4.02
1243	3.885
1244	4.017
1245	3.874
1246	3.904
1247	3.949
1248	3.955
1249	4.095
1250	3.969
1251	3.917
1252	3.95
1253	3.972
1254	3.903
1255	4.042
1256	4.015
1257	3.897
1258	4.134
1259	4.082
1260	3.868
1261	3.9
1262	3.92
1263	4.011
1264	3.997
1265	3.963
1266	3.891
1267	3.776
1268	3.774
1269	3.876
1270	3.836
1271	4.019
1272	4.075
1273	4.065
1274	4.092
1275	4.024
1276	4.229
1277	4.052
1278	4.064
1279	4.096
1280	4.048
1281	4.017
1282	4.046
1283	3.825
1284	3.863
1285	3.771
1286	3.707
1287	3.694
1288	3.941
1289	3.886
1290	3.564
1291	3.626
1292	3.844
1293	3.874
1294	3.808
1295	3.735
1296	3.89
1297	3.706
1298	3.634
1299	3.878
1300	3.775
1301	3.758
1302	3.678
1303	3.679
1304	3.614
1305	3.749
1306	3.774
1307	3.732
1308	3.794
1309	3.573
1310	3.706
1311	3.608
1312	3.814
1313	3.7
1314	3.791
1315	3.77
1316	3.703
1317	3.738
1318	3.745
1319	3.683
1320	3.676
1321	3.637
1322	3.69
1323	3.597
1324	3.68
1325	3.829
1326	3.683
1327	3.662
1328	3.673
1329	3.754
1330	3.976
1331	3.873
1332	3.91
1333	4.008
1334	3.823
1335	3.764
1336	3.815
1337	3.763
1338	4.059
1339	4.02
1340	3.828
1341	3.849
1342	3.853
1343	3.743
1344	3.524
1345	3.813
1346	3.928
1347	3.991
1348	4.067
1349	4.159
1350	4.197
1351	4.106
1352	3.998
1353	4.073
1354	3.99
1355	3.751
1356	3.882
1357	3.979
1358	3.918
1359	3.989
1360	3.833
1361	4.003
1362	3.859
1363	3.797
1364	4.084
1365	4.077
1366	3.999
1367	4.157
1368	4.148
1369	4.201
1370	4.237
1371	4.306
1372	4.067
1373	4.072
1374	4.089
1375	4.137
1376	4.31
1377	4.295
1378	4.152
1379	4.047
1380	3.963
1381	4.145
1382	4.108
1383	4.116
1384	4.292
1385	4.293
1386	4.317
1387	4.198
1388	4.333
1389	4.152
1390	4.193
1391	4.062
1392	3.957
1393	4.055
1394	4.185
1395	4.163
1396	4.009
1397	4.23
1398	4.014
1399	3.92
1400	4
1401	3.977
1402	3.906
1403	3.854
1404	3.802
1405	3.803
1406	3.78
1407	3.812
1408	3.957
1409	3.955
1410	3.957
1411	4.009
1412	3.875
1413	3.955
1414	3.725
1415	3.781
1416	3.893
1417	3.93
1418	3.84
1419	3.818
1420	3.638
1421	3.883
1422	3.794
1423	3.832
1424	3.889
1425	3.976
1426	4.082
1427	3.982
1428	3.877
1429	3.992
1430	3.88
1431	4.041
1432	4.146
1433	4.034
1434	4.059
1435	4.238
1436	4.165
1437	3.997
1438	4.116
1439	4.238
1440	4.302
1441	4.079
1442	4.24
1443	4.297
1444	4.142
1445	4.085
1446	3.959
1447	3.883
1448	3.921
1449	3.945
1450	3.873
1451	3.862
1452	3.921
1453	3.891
1454	3.808
1455	3.833
1456	3.989
1457	4.034
1458	3.934
1459	3.961
1460	3.797
1461	3.769
1462	3.812
1463	3.853
1464	3.915
1465	3.904
1466	3.808
1467	4.032
1468	3.947
1469	3.77
1470	3.774
1471	3.787
1472	3.848
1473	3.862
1474	3.841
1475	3.855
1476	3.817
1477	3.791
1478	3.889
1479	3.773
1480	3.871
1481	3.937
1482	3.843
1483	3.885
1484	3.903
1485	3.97
1486	3.73
1487	3.698
1488	3.778
1489	3.763
1490	3.728
1491	3.693
1492	3.829
1493	3.795
1494	3.632
1495	3.624
1496	3.5
1497	3.708
1498	3.48
1499	3.653
1500	3.565
1501	3.661
1502	3.769
1503	3.858
1504	3.909
1505	3.906
1506	3.818
1507	3.804
1508	3.791
1509	3.652
1510	3.751
1511	3.89
1512	3.841
1513	3.817
1514	3.951
1515	3.919
1516	4.056
1517	4.082
1518	3.853
1519	3.846
1520	3.95
1521	3.835
1522	3.734
1523	3.834
1524	3.753
1525	3.876
1526	3.799
1527	3.735
1528	3.734
1529	3.92
1530	4.046
1531	3.978
1532	4.059
1533	3.954
1534	3.984
1535	4.024
1536	3.789
1537	3.866
1538	3.804
1539	3.86
1540	3.688
1541	3.997
1542	4.07
1543	3.957
1544	3.77
1545	3.676
1546	3.853
1547	3.902
1548	3.84
1549	3.876
1550	3.925
1551	3.828
1552	3.905
1553	4.038
1554	4.083
1555	4.094
1556	3.927
1557	3.935
1558	4.012
1559	4.045
1560	4.12
1561	4.11
1562	3.887
1563	3.898
1564	3.899
1565	3.868
1566	3.719
1567	3.866
1568	3.913
1569	3.748
1570	3.657
1571	3.784
1572	3.896
1573	3.714
1574	3.739
1575	3.597
1576	3.717
1577	3.533
1578	3.466
1579	3.55
1580	3.554
1581	3.671
1582	3.715
1583	3.627
1584	3.437
1585	3.661
1586	3.562
1587	3.346
1588	3.572
1589	3.543
1590	3.594
1591	3.475
1592	3.559
1593	3.596
1594	3.747
1595	3.558
1596	3.664
1597	3.661
1598	3.527
1599	3.659
1600	3.807
1601	3.764
1602	3.811
1603	3.77
1604	3.829
1605	3.991
1606	4.056
1607	4.111
1608	3.939
1609	3.79
1610	3.831
1611	3.899
1612	4.051
1613	3.94
1614	4.06
1615	4.049
1616	3.968
1617	4.17
1618	3.944
1619	4.03
1620	3.89
1621	3.936
1622	4.03
1623	3.988
1624	4.027
1625	3.947
1626	3.782
1627	3.716
1628	3.794
1629	3.886
1630	3.669
1631	3.58
1632	3.614
1633	3.498
1634	3.615
1635	3.75
1636	3.346
1637	3.409
1638	3.701
1639	3.488
1640	3.57
1641	3.683
1642	3.689
1643	3.673
1644	3.525
1645	3.441
1646	3.553
1647	3.642
1648	3.895
1649	3.76
1650	3.759
1651	3.743
1652	3.825
1653	3.85
1654	4.04
1655	3.835
1656	3.845
1657	3.806
1658	3.831
1659	3.671
1660	3.691
1661	3.732
1662	3.548
1663	3.726
1664	3.629
1665	3.643
1666	3.85
1667	3.95
1668	3.879
1669	4.042
1670	3.823
1671	3.842
1672	3.99
1673	3.87
1674	3.9
1675	4.153
1676	3.8
1677	3.784
1678	3.857
1679	4.054
1680	3.858
1681	3.885
1682	3.827
1683	3.936
1684	3.999
1685	3.819
1686	3.803
1687	3.914
1688	4.142
1689	4.145
1690	4.121
1691	4.066
1692	3.929
1693	3.894
1694	3.776
1695	3.76
1696	4.011
1697	3.935
1698	3.97
1699	3.906
1700	4.009
1701	4.067
1702	4.297
1703	4.283
1704	4.487
1705	4.408
1706	4.022
1707	4.129
1708	4.023
1709	3.928
1710	4.135
1711	3.83
1712	4.016
1713	4.132
1714	3.868
1715	4.009
1716	4.019
1717	3.91
1718	3.944
1719	4.089
1720	4.117
1721	4.052
1722	4.101
1723	4.218
1724	3.998
1725	4.01
1726	3.971
1727	4.091
1728	4.034
1729	3.888
1730	3.861
1731	3.85
1732	3.815
1733	3.918
1734	3.685
1735	3.796
1736	3.683
1737	3.847
1738	3.904
1739	3.646
1740	3.557
1741	3.588
1742	3.579
1743	3.682
1744	3.616
1745	3.624
1746	3.459
1747	3.826
1748	3.624
1749	3.686
1750	3.708
1751	3.682
1752	3.68
1753	3.58
1754	3.687
1755	3.868
1756	3.857
1757	3.772
1758	3.721
1759	3.744
1760	3.82
1761	3.84
1762	3.947
1763	3.922
1764	3.899
1765	4.04
1766	3.749
1767	3.771
1768	3.709
1769	3.839
1770	3.721
1771	3.802
1772	3.738
1773	3.654
1774	3.647
1775	3.985
1776	3.83
1777	3.87
1778	3.747
1779	3.61
1780	3.54
1781	3.466
1782	3.541
1783	3.498
1784	3.438
1785	3.557
1786	3.593
1787	3.581
1788	3.613
1789	3.789
1790	3.8
1791	3.582
1792	3.913
1793	3.978
1794	3.938
1795	3.755
1796	3.665
1797	3.872
1798	3.765
1799	3.813
1800	3.787
1801	3.779
1802	3.757
1803	3.768
1804	3.767
1805	3.683
1806	3.638
1807	3.623
1808	3.596
1809	3.564
1810	3.865
1811	3.58
1812	3.745
1813	3.754
1814	3.607
1815	3.682
1816	3.677
1817	3.759
1818	3.746
1819	3.763
1820	3.675
1821	3.716
1822	3.89
1823	3.722
1824	4.013
1825	3.893
1826	3.984
1827	3.869
1828	3.997
1829	3.948
1830	3.915
1831	4.066
1832	4.029
1833	3.898
1834	3.997
1835	3.778
1836	3.969
1837	4.086
1838	3.871
1839	4.118
1840	4.058
1841	3.787
1842	3.945
1843	3.773
1844	3.741
1845	3.596
1846	3.769
1847	3.832
1848	3.926
1849	3.846
1850	3.78
1851	3.696
1852	3.811
1853	3.764
1854	3.67
1855	3.467
1856	3.749
1857	3.655
1858	3.602
1859	3.542
1860	3.614
1861	3.693
1862	3.681
1863	3.752
1864	3.493
1865	3.557
1866	3.618
1867	3.617
1868	3.69
1869	3.824
1870	3.564
1871	3.648
1872	3.874
1873	3.829
1874	3.859
1875	3.999
1876	3.939
1877	3.88
1878	3.886
1879	3.876
1880	4.011
1881	4.018
1882	4.138
1883	4.209
1884	4.072
1885	4.116
1886	4.072
1887	4.018
1888	4.029
1889	3.892
1890	3.939
1891	3.881
1892	3.803
1893	3.651
1894	3.469
1895	3.59
1896	3.831
1897	3.897
1898	3.962
1899	4.064
1900	3.968
1901	4.053
1902	4.041
1903	4.236
1904	4.305
1905	4.218
1906	4.321
1907	3.951
1908	3.842
1909	3.893
1910	4.005
1911	3.927
1912	3.853
1913	3.98
1914	3.846
1915	4.069
1916	3.891
1917	3.999
1918	4.017
1919	4.048
1920	4.15
1921	4.133
1922	3.987
1923	3.934
1924	3.897
1925	3.922
1926	3.995
1927	3.839
1928	3.781
1929	3.803
1930	3.842
1931	3.77
1932	3.809
1933	3.902
1934	3.771
1935	3.839
1936	3.949
1937	3.89
1938	3.82
1939	3.9
1940	3.708
1941	3.729
1942	3.587
1943	3.568
1944	3.603
1945	3.689
1946	3.65
1947	3.726
1948	3.755
1949	3.798
1950	3.662
1951	3.559
1952	3.879
1953	3.812
1954	3.955
1955	3.774
1956	4.004
1957	3.94
1958	3.78
1959	3.778
1960	3.663
1961	3.677
1962	3.501
1963	3.355
1964	3.477
1965	3.679
1966	3.553
1967	3.667
1968	3.797
1969	3.715
1970	3.693
1971	3.731
1972	3.522
1973	3.545
1974	3.527
1975	3.806
1976	3.667
1977	3.578
1978	3.679
1979	3.721
1980	3.583
1981	3.725
1982	3.577
1983	3.639
1984	3.697
1985	3.761
1986	3.728
1987	3.725
1988	3.548
1989	3.479
1990	3.788
1991	3.705
1992	3.63
1993	3.579
1994	3.808
1995	3.767
1996	3.597
1997	3.668
1998	3.769
1999	3.861
2000	3.77
2001	3.708
2002	3.852
2003	3.813
2004	3.861
2005	3.707
2006	3.542
2007	3.721
2008	3.76
2009	3.696
2010	3.845
2011	4.079
2012	3.925
2013	3.691
2014	3.914
2015	3.627
2016	3.804
2017	3.715
2018	3.759
2019	3.707
2020	3.786
2021	3.721
2022	3.822
2023	3.788
2024	3.82
2025	3.791
2026	3.581
2027	3.687
2028	3.663
2029	3.821
2030	3.724
2031	3.751
2032	3.715
2033	3.673
2034	3.722
2035	3.803
2036	3.626
2037	3.681
2038	3.56
2039	3.589
2040	3.569
2041	3.739
2042	3.716
2043	3.929
2044	3.812
2045	3.739
2046	3.887
2047	3.903
2048	3.952
2049	3.985
2050	3.98
2051	4.125
2052	3.995
2053	4.111
2054	4.05
2055	4.202
2056	3.968
2057	3.87
2058	3.887
2059	3.767
2060	3.795
2061	3.973
2062	3.873
2063	3.791
2064	3.87
2065	3.791
2066	3.554
2067	3.688
2068	3.595
2069	3.552
2070	3.614
2071	3.782
2072	3.847
2073	3.754
2074	3.721
2075	3.668
2076	3.695
2077	3.782
2078	3.77
2079	3.776
2080	3.682
2081	3.902
2082	3.715
2083	3.742
2084	3.628
2085	3.858
2086	3.866
2087	3.808
2088	3.74
2089	3.793
2090	3.831
2091	3.861
2092	3.963
2093	3.904
2094	3.886
2095	4.056
2096	4.127
2097	4.127
2098	3.942
2099	3.957
2100	3.843
2101	3.817
2102	3.728
2103	3.748
2104	3.822
2105	3.884
2106	3.84
2107	3.929
2108	3.937
2109	3.989
2110	3.915
2111	3.958
2112	3.977
2113	3.842
2114	3.982
2115	3.983
2116	3.869
2117	3.694
2118	3.798
2119	3.932
2120	3.698
2121	3.899
2122	3.84
2123	3.67
2124	3.772
2125	3.742
2126	3.676
2127	3.69
2128	3.608
2129	3.645
2130	3.812
2131	3.818
2132	4.007
2133	3.9
2134	3.787
2135	3.991
2136	3.982
2137	3.973
2138	3.9
2139	3.804
2140	3.891
2141	3.912
2142	3.817
2143	3.844
2144	3.969
2145	3.908
2146	3.995
2147	3.853
2148	3.92
2149	3.988
2150	4.083
2151	3.92
2152	3.863
2153	3.931
2154	3.864
2155	3.766
2156	3.829
2157	3.833
2158	4.014
2159	4.061
2160	4.111
2161	4.006
2162	4.013
2163	3.78
2164	4.034
2165	3.784
2166	3.928
2167	3.837
2168	3.976
2169	3.831
2170	4.109
2171	3.945
2172	3.994
2173	4.092
2174	3.86
2175	3.865
2176	3.986
2177	3.946
2178	3.912
2179	3.688
2180	3.742
2181	3.823
2182	3.912
2183	3.75
2184	3.851
2185	3.832
2186	3.667
2187	3.721
2188	3.651
2189	3.661
2190	3.793
2191	3.755
2192	3.711
2193	3.781
2194	3.85
2195	3.925
2196	3.733
2197	3.606
2198	3.904
2199	4
2200	3.855
2201	3.92
2202	3.897
2203	3.973
2204	3.897
2205	4.02
2206	3.891
2207	3.838
2208	4.004
2209	3.877
2210	4.018
2211	3.889
2212	3.682
2213	3.814
2214	3.778
2215	3.731
2216	3.912
2217	3.817
2218	3.855
2219	3.835
2220	3.893
2221	3.989
2222	3.842
2223	4.049
2224	4.082
2225	3.885
2226	3.992
2227	3.887
2228	4.043
2229	4.033
2230	4.263
2231	4.207
2232	4.283
2233	4.252
2234	4.208
2235	4.244
2236	4.422
2237	4.513
2238	4.654
2239	4.659
2240	4.53
2241	4.686
2242	4.658
2243	4.649
2244	4.867
2245	4.748
2246	4.589
2247	4.461
2248	4.617
2249	4.708
2250	4.649
2251	4.772
2252	4.793
2253	4.913
2254	4.843
2255	4.808
2256	4.968
2257	4.725
2258	4.552
2259	4.603
2260	4.759
2261	4.813
2262	4.976
2263	4.944
2264	4.983
2265	4.797
2266	5.045
2267	4.969
2268	4.964
2269	5.024
2270	4.698
2271	4.948
2272	5.058
2273	4.956
2274	5.008
2275	5.114
2276	5.176
2277	5.12
2278	5.071
2279	5.121
2280	5.118
2281	5.157
2282	5.191
2283	5.349
2284	5.264
2285	5.478
2286	5.435
2287	5.524
2288	5.654
2289	5.547
2290	5.593
2291	5.57
2292	5.574
2293	5.668
2294	5.535
2295	5.62
2296	5.692
2297	5.677
2298	5.883
2299	5.736
2300	5.87
2301	5.886
2302	5.951
2303	6.01
2304	5.897
2305	5.876
2306	5.935
2307	5.866
2308	5.743
2309	5.893
2310	5.91
2311	6.013
2312	6.15
2313	6.244
2314	6.324
2315	6.342
2316	6.212
2317	6.291
2318	6.288
2319	6.282
2320	6.411
2321	6.277
2322	6.347
2323	6.373
2324	6.242
2325	6.405
2326	6.407
2327	6.296
2328	6.348
2329	6.438
2330	6.6
2331	6.579
2332	6.648
2333	6.766
2334	6.995
2335	6.915
2336	7.113
2337	6.917
2338	6.908
2339	6.914
2340	6.788
2341	6.947
2342	6.912
2343	6.957
2344	7.11
2345	7.075
2346	7.165
2347	7.177
2348	7.116
2349	7.03
2350	7.17
2351	7.271
2352	7.204
2353	7.14
2354	7.243
2355	7.225
2356	7.239
2357	7.237
2358	7.41
2359	7.509
2360	7.41
2361	7.418
2362	7.257
2363	7.374
2364	7.427
2365	7.521
2366	7.662
2367	7.583
2368	7.574
2369	7.614
2370	7.836
2371	7.759
2372	7.824
2373	7.874
2374	7.72
2375	7.696
2376	7.609
2377	7.587
2378	7.63
2379	7.704
2380	7.454
2381	7.756
2382	7.583
2383	7.788
2384	7.718
2385	7.589
2386	7.664
2387	7.717
2388	7.653
2389	7.828
2390	7.681
2391	7.407
2392	7.662
2393	7.896
2394	7.893
2395	7.866
2396	7.773
2397	7.865
2398	7.837
2399	7.703
2400	7.853
2401	7.935
2402	7.775
2403	7.661
2404	7.599
2405	7.774
2406	7.818
2407	7.649
2408	7.875
2409	7.894
2410	7.811
2411	7.858
2412	7.688
2413	7.402
2414	7.221
2415	7.374
2416	7.542
2417	7.403
2418	7.568
2419	7.649
2420	7.545
2421	7.651
2422	7.564
2423	7.541
2424	7.466
2425	7.48
2426	7.521
2427	7.823
2428	7.855
2429	8.147
2430	8.008
2431	7.918
2432	7.961
2433	7.861
2434	7.834
2435	7.64
2436	7.91
2437	7.941
2438	7.731
2439	7.614
2440	7.641
2441	7.946
2442	7.795
2443	7.412
2444	7.201
2445	7.332
2446	7.46
2447	7.59
2448	7.408
2449	7.606
2450	7.716
2451	7.769
2452	7.868
2453	7.932
2454	8.065
2455	7.951
2456	7.918
2457	8.042
2458	7.968
2459	8.02
2460	7.914
2461	7.588
2462	7.565
2463	7.761
2464	7.548
2465	7.422
2466	7.694
2467	7.685
2468	8.031
2469	7.767
2470	7.416
2471	7.741
2472	7.465
2473	7.259
2474	7.346
2475	7.484
2476	7.577
2477	7.247
2478	7.382
2479	7.343
2480	7.473
2481	7.553
2482	7.601
2483	7.593
2484	7.172
2485	7.5
2486	7.464
2487	7.458
2488	7.653
2489	7.454
2490	7.523
2491	7.149
2492	7.302
2493	7.5
2494	7.683
2495	7.227
2496	7.261
2497	7.069
2498	7.288
2499	7.538
2500	7.679
2501	7.549
2502	7.633
2503	7.48
2504	7.394
2505	7.226
2506	7.517
2507	7.759
2508	7.467
2509	7.335
2510	7.31
2511	7.436
2512	7.378
2513	7.373
2514	6.984
2515	7.083
2516	6.879
2517	7.119
2518	7.301
2519	7.523
2520	7.487
2521	7.506
2522	7.834
2523	7.752
2524	7.64
2525	7.647
2526	7.402
2527	7.372
2528	7.309
2529	7.43
2530	7.112
2531	7.154
2532	7.05
2533	6.819
2534	6.861
2535	7.204
2536	7.385
2537	7.529
2538	7.013
2539	7.195
2540	6.936
2541	6.513
2542	6.701
2543	6.735
2544	6.746
2545	6.212
2546	6.611
2547	6.603
2548	6.607
2549	6.116
2550	6.544
2551	6.44
2552	6.764
2553	7.101
2554	6.761
2555	6.682
2556	6.834
2557	6.603
2558	6.538
2559	6.333
2560	6.499
2561	6.69
2562	6.551
2563	6.793
2564	6.885
2565	6.59
2566	7.028
2567	6.648
2568	6.483
2569	6.479
2570	6.765
2571	6.846
2572	6.93
2573	6.919
2574	6.833
2575	6.886
2576	6.876
2577	6.822
2578	6.889
2579	6.907
2580	6.569
2581	6.8
2582	6.718
2583	6.747
2584	6.797
2585	6.826
2586	6.89
2587	7.201
2588	7.212
2589	7.007
2590	7.295
2591	7.34
2592	7.341
2593	7.368
2594	7.031
2595	6.839
2596	6.98
2597	6.722
2598	7.083
2599	7.179
2600	7.208
2601	7.215
2602	7.007
2603	7.146
2604	7.275
2605	7.444
2606	7.433
2607	7.241
2608	7.057
2609	7.117
2610	7.454
2611	7.473
2612	7.513
2613	7.185
2614	7.487
2615	7.813
2616	7.547
2617	7.726
2618	7.551
2619	7.472
2620	7.14
2621	7.317
2622	7.355
2623	7.561
2624	7.442
2625	7.53
2626	7.5
2627	7.34
2628	7.341
2629	7.525
2630	7.116
2631	7.112
2632	7.177
2633	7.386
2634	7.515
2635	7.524
2636	7.569
2637	7.295
2638	7.371
2639	7.38
2640	6.997
2641	7.32
2642	7.146
2643	7.123
2644	6.537
2645	7.02
2646	7.227
2647	7.138
2648	6.742
2649	6.87
2650	6.929
2651	6.812
2652	7.101
2653	7.121
2654	6.793
2655	6.721
2656	6.995
2657	7.209
2658	7.262
2659	7.241
2660	6.939
2661	7.043
2662	7.143
2663	7.228
2664	7.199
2665	7.138
2666	7.13
2667	7.23
2668	7.485
2669	7.467
2670	7.24
2671	7.477
2672	7.402
2673	7.558
2674	7.668
2675	7.696
2676	7.823
2677	7.317
2678	7.47
2679	7.335
2680	7.315
2681	7.24
2682	6.899
2683	7.237
2684	6.951
2685	6.856
2686	6.984
2687	6.991
2688	6.442
2689	7.282
2690	6.629
2691	6.733
2692	6.944
2693	7.296
2694	6.832
2695	6.879
2696	6.951
2697	7.084
2698	6.675
2699	6.672
2700	6.552
