# Supplementary material for: The role of scaffold reshaping and disassembly in dynamin driven membrane fission
Source: eLife journal article supplement (doi:10.7554/elife.39441), 2018-12-18
Supplement: supp [file elife-39441-supp-v1.zip › elife_poa_e39441_Figure_6_source_data_1.txt]

#  DATA FILE for Fig. 6 in the paper
#
#      "The role of scaffold reshaping and disassembly
#       in dynamin driven membrane fission"
#
#  by Martina Pannuzzo, Zachary A. McDargh, and Markus Deserno
#
#  published in eLife
#
#  -------------------------------------------------------------
#  time evolution of scaffold rotation angle phi
#  -------------------------------------------------------------
#  
#  Column 1: t   (time of simulation, in units of tau)
#  Column 2: phi (rotation angle of dynamin scaffold, in rad)
#
0 0.021965
1 0.021965
2 0.002561
3 0.038734
4 0.005736
5 0.022846
6 0.014632
7 0.036797
8 0.01548
9 0.029312
10 0.032969
11 0.029814
12 0.003239
13 0.028464
14 0.019849
15 0.021872
16 0.015086
17 0.02529
18 0.014468
19 0.022459
20 0.02612
21 0.016953
22 0.015082
23 0.026047
24 0.01944
25 0.033651
26 0.038457
27 0.008534
28 0.014076
29 0.020091
30 0.02615
31 0.013301
32 0.0232
33 0.029468
34 0.015618
35 0.045938
36 0.035768
37 0.009348
38 0.029249
39 0.008964
40 0.001196
41 0.019289
42 0.027013
43 0.009063
44 0.017991
45 0.031792
46 0.02675
47 0.031779
48 0.010335
49 0.021728
50 0.020754
51 0.025457
52 0.026008
53 0.016978
54 0.022382
55 0.012831
56 0.03232
57 0.017848
58 0.018842
59 0.02459
60 0.005757
61 0.025419
62 0.031979
63 0.02581
64 0.023405
65 0.035755
66 0.021146
67 0.033192
68 0.012835
69 0.007135
70 0.006827
71 0.015822
72 0.016017
73 0.011257
74 0.00547
75 0.026393
76 0.009322
77 0.021443
78 0.024112
79 0.026075
80 0.018959
81 0.023631
82 0.012747
83 0.02054
84 0.008358
85 0.029231
86 0.023341
87 0.009587
88 0.040132
89 0.010007
90 0.026703
91 0.006244
92 0.033181
93 0.028031
94 0.012478
95 0.023605
96 0.01969
97 0.009023
98 0.024295
99 0.036332
100 0.018597
101 0.005546
102 0.027009
103 0.016702
104 0.020171
105 0.018309
106 0.016706
107 0.022049
108 0.020147
109 0.021451
110 0.016465
111 0.030055
112 0.004821
113 0.010631
114 0.042503
115 0.021804
116 0.008721
117 0.02289
118 0.016028
119 0.011005
120 0.021568
121 0.007689
122 0.02144
123 0.011446
124 0.021079
125 0.008673
126 0.009518
127 0.034551
128 0.03378
129 0.01965
130 0.014072
131 0.013188
132 0.002184
133 0.009911
134 0.016841
135 0.018516
136 0.01439
137 0.021941
138 0.034884
139 0.004422
140 0.005631
141 0.026141
142 0.039597
143 0.036009
144 0.014806
145 0.022304
146 0.019789
147 0.031878
148 0.007728
149 0.010467
150 0.020339
151 0.025212
152 0.011749
153 0.020204
154 0.035403
155 0.03382
156 0.023175
157 0.025767
158 0.027523
159 0.015243
160 0.020828
161 0.00386
162 0.025988
163 0.026467
164 0.021323
165 0.019665
166 0.042168
167 0.024125
168 0.019087
169 0.03212
170 0.021543
171 0.016301
172 0.011156
173 0.004299
174 0.034173
175 0.018462
176 0.00918
177 0.052453
178 0.020897
179 0.010798
180 0.014534
181 0.034409
182 0.021935
183 0.007209
184 0.008707
185 0.043513
186 0.025634
187 0.039393
188 0.01803
189 0.016013
190 0.019559
191 0.031696
192 0.003906
193 0.021401
194 0.02146
195 0.011215
196 0.034829
197 0.011678
198 0.014485
199 0.010125
200 0.042026
201 0.006422
202 0.027779
203 0.016425
204 0.016017
205 0.015762
206 0.023456
207 0.044316
208 0.013403
209 0.013893
210 0.009023
211 0.035381
212 0.034404
213 0.018705
214 0.021987
215 0.01205
216 0.047831
217 0.024495
218 0.028925
219 0.014021
220 0.010084
221 0.029676
222 0.01767
223 0.012933
224 0.028475
225 0.042957
226 0.023311
227 0.017894
228 0.007193
229 0.021186
230 0.026145
231 0.037741
232 0.012372
233 0.028336
234 0.030858
235 0.01203
236 0.027469
237 0.035512
238 0.031785
239 0.021634
240 0.026084
241 0.019363
242 0.009959
243 0.00809
244 0.043487
245 0.02244
246 0.030775
247 0.020189
248 0.022514
249 0.007101
250 0.004895
251 0.005382
252 0.003239
253 0.006731
254 0.039725
255 0.035986
256 0.017703
257 0.031337
258 0.019498
259 0.036004
260 0.011378
261 0.021546
262 0.027803
263 0.032346
264 0.036098
265 0.02295
266 0.011896
267 0.010149
268 0.029314
269 0.007941
270 0.008422
271 0.014774
272 0.006905
273 0.015282
274 0.008221
275 0.020362
276 0.016663
277 0.007736
278 0.026397
279 0.025928
280 0.009668
281 0.020549
282 0.0261
283 0.022746
284 0.035317
285 0.010473
286 0.008652
287 0.024665
288 0.021741
289 0.028102
290 0.040946
291 0.020427
292 0.008937
293 0.010858
294 0.012928
295 0.007557
296 0.011043
297 0.019397
298 0.013668
299 0.045849
300 0.022625
301 0.026497
302 0.17574
303 0.179448
304 0.195597
305 0.191801
306 0.166351
307 0.205508
308 0.168695
309 0.210432
310 0.172247
311 0.172768
312 0.171375
313 0.195998
314 0.189168
315 0.200191
316 0.213064
317 0.190507
318 0.184391
319 0.16728
320 0.233985
321 0.194683
322 0.208628
323 0.180151
324 0.181043
325 0.170614
326 0.13235
327 0.188061
328 0.195011
329 0.192209
330 0.169374
331 0.185525
332 0.178926
333 0.170942
334 0.19125
335 0.176569
336 0.188657
337 0.210032
338 0.187522
339 0.188386
340 0.169151
341 0.158263
342 0.192601
343 0.167584
344 0.17431
345 0.183008
346 0.164257
347 0.162532
348 0.168279
349 0.195728
350 0.169338
351 0.173219
352 0.166881
353 0.190549
354 0.19419
355 0.193222
356 0.188386
357 0.20604
358 0.155428
359 0.188577
360 0.185105
361 0.208481
362 0.165008
363 0.201113
364 0.204276
365 0.190108
366 0.180768
367 0.185373
368 0.210578
369 0.180737
370 0.184383
371 0.194436
372 0.214902
373 0.180791
374 0.206728
375 0.163156
376 0.202796
377 0.188218
378 0.204781
379 0.190762
380 0.167093
381 0.18757
382 0.184538
383 0.174667
384 0.190279
385 0.188625
386 0.18812
387 0.186978
388 0.188265
389 0.209353
390 0.186103
391 0.188446
392 0.201296
393 0.179789
394 0.197133
395 0.175888
396 0.194287
397 0.195511
398 0.170195
399 0.183734
400 0.183781
401 0.185508
402 0.191997
403 0.19028
404 0.180551
405 0.191303
406 0.188465
407 0.180602
408 0.207099
409 0.186861
410 0.165225
411 0.198962
412 0.173327
413 0.173458
414 0.192464
415 0.190117
416 0.180992
417 0.173971
418 0.177871
419 0.1825
420 0.203044
421 0.211077
422 0.182104
423 0.178118
424 0.212503
425 0.182073
426 0.186401
427 0.210069
428 0.192427
429 0.197379
430 0.169843
431 0.190005
432 0.176154
433 0.195081
434 0.179962
435 0.169416
436 0.186941
437 0.171211
438 0.192651
439 0.183603
440 0.174321
441 0.160976
442 0.170616
443 0.189032
444 0.196275
445 0.186077
446 0.212955
447 0.175508
448 0.175687
449 0.168872
450 0.186231
451 0.174726
452 0.18232
453 0.20877
454 0.175956
455 0.220219
456 0.185485
457 0.191464
458 0.188751
459 0.170649
460 0.183823
461 0.177615
462 0.178277
463 0.186418
464 0.188404
465 0.204364
466 0.187497
467 0.163789
468 0.201622
469 0.20861
470 0.206356
471 0.162598
472 0.191839
473 0.198154
474 0.204739
475 0.178449
476 0.172944
477 0.203515
478 0.168492
479 0.175942
480 0.179861
481 0.168924
482 0.176233
483 0.195339
484 0.197184
485 0.196096
486 0.197207
487 0.192639
488 0.168346
489 0.183338
490 0.203442
491 0.191864
492 0.20108
493 0.219387
494 0.191105
495 0.192144
496 0.192263
497 0.224728
498 0.183401
499 0.167854
500 0.191873
501 0.195357
502 0.180474
503 0.197863
504 0.184857
505 0.179395
506 0.194347
507 0.189858
508 0.165781
509 0.188357
510 0.204584
511 0.174494
512 0.190122
513 0.182133
514 0.212595
515 0.185111
516 0.204026
517 0.192759
518 0.20042
519 0.213646
520 0.195093
521 0.20085
522 0.199368
523 0.192327
524 0.183026
525 0.174041
526 0.19657
527 0.21112
528 0.19777
529 0.207105
530 0.182174
531 0.210177
532 0.209232
533 0.193411
534 0.178657
535 0.161728
536 0.19822
537 0.185584
538 0.193418
539 0.192365
540 0.183558
541 0.190568
542 0.179901
543 0.215125
544 0.178118
545 0.206789
546 0.176643
547 0.176654
548 0.192335
549 0.169366
550 0.204785
551 0.197601
552 0.200515
553 0.1905
554 0.185881
555 0.190042
556 0.190165
557 0.190331
558 0.180665
559 0.188338
560 0.185099
561 0.183443
562 0.181984
563 0.176045
564 0.156988
565 0.186369
566 0.186764
567 0.208723
568 0.200491
569 0.161039
570 0.157974
571 0.178091
572 0.192782
573 0.196057
574 0.19319
575 0.170891
576 0.193484
577 0.177948
578 0.188699
579 0.199469
580 0.199161
581 0.195154
582 0.219635
583 0.189627
584 0.180943
585 0.179942
586 0.191118
587 0.190419
588 0.198084
589 0.197358
590 0.179374
591 0.192904
592 0.195252
593 0.187494
594 0.17907
595 0.189725
596 0.187147
597 0.15914
598 0.218285
599 0.197239
600 0.193095
601 0.19878
602 0.374565
603 0.356252
604 0.384399
605 0.350998
606 0.355376
607 0.369861
608 0.355136
609 0.381387
610 0.353489
611 0.341839
612 0.348695
613 0.357336
614 0.367947
615 0.371274
616 0.359089
617 0.355848
618 0.356561
619 0.377623
620 0.408117
621 0.363665
622 0.40708
623 0.370303
624 0.346361
625 0.351331
626 0.369378
627 0.383939
628 0.360494
629 0.375196
630 0.352611
631 0.391696
632 0.38656
633 0.369109
634 0.37407
635 0.354404
636 0.357945
637 0.366654
638 0.359185
639 0.375083
640 0.354752
641 0.379106
642 0.373837
643 0.345747
644 0.369
645 0.382725
646 0.362682
647 0.386842
648 0.365621
649 0.378706
650 0.345435
651 0.379727
652 0.372898
653 0.377383
654 0.347058
655 0.35005
656 0.395118
657 0.365561
658 0.359739
659 0.35279
660 0.383326
661 0.366476
662 0.38231
663 0.375045
664 0.359949
665 0.378007
666 0.406444
667 0.392513
668 0.367586
669 0.368692
670 0.373196
671 0.359113
672 0.387291
673 0.376649
674 0.372717
675 0.356048
676 0.371643
677 0.384956
678 0.37011
679 0.35839
680 0.366973
681 0.361248
682 0.345807
683 0.390065
684 0.365911
685 0.375823
686 0.369052
687 0.361907
688 0.364035
689 0.356288
690 0.359553
691 0.355833
692 0.396161
693 0.36734
694 0.38382
695 0.377473
696 0.400559
697 0.374853
698 0.380181
699 0.386418
700 0.343809
701 0.379543
702 0.36016
703 0.365921
704 0.398006
705 0.396066
706 0.382489
707 0.350196
708 0.344309
709 0.397671
710 0.374627
711 0.366106
712 0.369838
713 0.367056
714 0.342675
715 0.369343
716 0.372481
717 0.347768
718 0.372873
719 0.367067
720 0.383063
721 0.359014
722 0.342376
723 0.347408
724 0.377701
725 0.370019
726 0.376823
727 0.36744
728 0.369842
729 0.386753
730 0.393715
731 0.375549
732 0.376897
733 0.367663
734 0.361072
735 0.368973
736 0.37356
737 0.373515
738 0.338587
739 0.368217
740 0.351132
741 0.360165
742 0.374881
743 0.376791
744 0.372882
745 0.35963
746 0.369961
747 0.37044
748 0.372733
749 0.367967
750 0.370495
751 0.387287
752 0.36903
753 0.37456
754 0.357103
755 0.360741
756 0.35787
757 0.357741
758 0.3623
759 0.347209
760 0.372442
761 0.360795
762 0.373014
763 0.357222
764 0.386716
765 0.371635
766 0.381841
767 0.366472
768 0.368446
769 0.348443
770 0.372025
771 0.38796
772 0.367673
773 0.391268
774 0.359115
775 0.34784
776 0.386188
777 0.389991
778 0.371852
779 0.377971
780 0.354877
781 0.357184
782 0.351907
783 0.337129
784 0.370622
785 0.38898
786 0.344107
787 0.35882
788 0.362952
789 0.364575
790 0.365943
791 0.374576
792 0.387374
793 0.387053
794 0.379423
795 0.379489
796 0.3888
797 0.34299
798 0.363314
799 0.36711
800 0.364683
801 0.376516
802 0.373623
803 0.38534
804 0.341992
805 0.373447
806 0.365082
807 0.373483
808 0.377456
809 0.357499
810 0.385718
811 0.3832
812 0.354127
813 0.339701
814 0.351495
815 0.389707
816 0.357011
817 0.387304
818 0.327202
819 0.368543
820 0.366231
821 0.394086
822 0.371526
823 0.349026
824 0.369845
825 0.417381
826 0.382762
827 0.358333
828 0.372311
829 0.362957
830 0.355182
831 0.355706
832 0.375027
833 0.382426
834 0.378302
835 0.361035
836 0.373182
837 0.366632
838 0.37221
839 0.375416
840 0.383731
841 0.378757
842 0.384158
843 0.405139
844 0.368881
845 0.358375
846 0.364353
847 0.379657
848 0.38026
849 0.368785
850 0.379406
851 0.352011
852 0.345843
853 0.391636
854 0.357564
855 0.377137
856 0.351773
857 0.329147
858 0.3801
859 0.36403
860 0.364946
861 0.383112
862 0.368435
863 0.382887
864 0.361815
865 0.385613
866 0.387458
867 0.381143
868 0.391856
869 0.376002
870 0.349241
871 0.380085
872 0.366392
873 0.360221
874 0.364741
875 0.375031
876 0.374723
877 0.383473
878 0.362981
879 0.342047
880 0.351733
881 0.383786
882 0.388023
883 0.354737
884 0.393362
885 0.370095
886 0.376843
887 0.378343
888 0.345146
889 0.385669
890 0.36012
891 0.353601
892 0.387076
893 0.370209
894 0.400983
895 0.38032
896 0.358571
897 0.369489
898 0.350446
899 0.362188
900 0.352058
901 0.370068
902 0.551855
903 0.543109
904 0.521801
905 0.552388
906 0.507973
907 0.565492
908 0.562975
909 0.548877
910 0.543231
911 0.528838
912 0.554952
913 0.541331
914 0.529519
915 0.524292
916 0.547109
917 0.542439
918 0.532733
919 0.559442
920 0.540814
921 0.541751
922 0.525682
923 0.555997
924 0.532939
925 0.536005
926 0.56741
927 0.559911
928 0.533643
929 0.564822
930 0.539215
931 0.529598
932 0.528863
933 0.521702
934 0.551587
935 0.556626
936 0.551683
937 0.525141
938 0.542974
939 0.531677
940 0.532094
941 0.546407
942 0.555144
943 0.561972
944 0.551494
945 0.557307
946 0.543284
947 0.525849
948 0.547707
949 0.509353
950 0.57371
951 0.543061
952 0.527956
953 0.559215
954 0.529187
955 0.521358
956 0.512706
957 0.552383
958 0.558801
959 0.537664
960 0.521128
961 0.534025
962 0.550087
963 0.547252
964 0.560403
965 0.53844
966 0.544335
967 0.540432
968 0.555678
969 0.52617
970 0.544009
971 0.558949
972 0.525037
973 0.534478
974 0.551223
975 0.536295
976 0.546445
977 0.570818
978 0.52925
979 0.530101
980 0.556099
981 0.544252
982 0.544683
983 0.537929
984 0.533796
985 0.547499
986 0.55657
987 0.548495
988 0.527345
989 0.553556
990 0.545158
991 0.547307
992 0.536785
993 0.55062
994 0.525738
995 0.555073
996 0.537833
997 0.547743
998 0.527843
999 0.544704
1000 0.536281
1001 0.553666
1002 0.529373
1003 0.53563
1004 0.529585
1005 0.541171
1006 0.541223
1007 0.543606
1008 0.528041
1009 0.543174
1010 0.530809
1011 0.520555
1012 0.526633
1013 0.527127
1014 0.557441
1015 0.53657
1016 0.527037
1017 0.543122
1018 0.555874
1019 0.54147
1020 0.535572
1021 0.533311
1022 0.530498
1023 0.515505
1024 0.555165
1025 0.534283
1026 0.548793
1027 0.550561
1028 0.573465
1029 0.534371
1030 0.528076
1031 0.546141
1032 0.555338
1033 0.505516
1034 0.532653
1035 0.541986
1036 0.546171
1037 0.542716
1038 0.536392
1039 0.544865
1040 0.531918
1041 0.563974
1042 0.560142
1043 0.564028
1044 0.544936
1045 0.540567
1046 0.541222
1047 0.564294
1048 0.543906
1049 0.53455
1050 0.523817
1051 0.554109
1052 0.549958
1053 0.543185
1054 0.540212
1055 0.547139
1056 0.541343
1057 0.535786
1058 0.536623
1059 0.541742
1060 0.545497
1061 0.542488
1062 0.529911
1063 0.535264
1064 0.544757
1065 0.545789
1066 0.545592
1067 0.559605
1068 0.538285
1069 0.538491
1070 0.521079
1071 0.534519
1072 0.550759
1073 0.549415
1074 0.546633
1075 0.558156
1076 0.555242
1077 0.547436
1078 0.526734
1079 0.554366
1080 0.531145
1081 0.554206
1082 0.544381
1083 0.55484
1084 0.534047
1085 0.519178
1086 0.529969
1087 0.534313
1088 0.558258
1089 0.522646
1090 0.546374
1091 0.531245
1092 0.52326
1093 0.54611
1094 0.536168
1095 0.547242
1096 0.538637
1097 0.531219
1098 0.544585
1099 0.554322
1100 0.532144
1101 0.543386
1102 0.536451
1103 0.547944
1104 0.546939
1105 0.553721
1106 0.536997
1107 0.564074
1108 0.540553
1109 0.553458
1110 0.538462
1111 0.535138
1112 0.546444
1113 0.552834
1114 0.556874
1115 0.560137
1116 0.53815
1117 0.528789
1118 0.55574
1119 0.561817
1120 0.524664
1121 0.545295
1122 0.563698
1123 0.531008
1124 0.530504
1125 0.566745
1126 0.540258
1127 0.530821
1128 0.518555
1129 0.518208
1130 0.533436
1131 0.536338
1132 0.529835
1133 0.530428
1134 0.554182
1135 0.548763
1136 0.529839
1137 0.536327
1138 0.536515
1139 0.531548
1140 0.55441
1141 0.545119
1142 0.534764
1143 0.536822
1144 0.55504
1145 0.521142
1146 0.517265
1147 0.5356
1148 0.529211
1149 0.563413
1150 0.531932
1151 0.526624
1152 0.536857
1153 0.579674
1154 0.534478
1155 0.511378
1156 0.54318
1157 0.547093
1158 0.525525
1159 0.53262
1160 0.555042
1161 0.556889
1162 0.546828
1163 0.541524
1164 0.559398
1165 0.512108
1166 0.521337
1167 0.551843
1168 0.550746
1169 0.526327
1170 0.530618
1171 0.560511
1172 0.574066
1173 0.515225
1174 0.527892
1175 0.534454
1176 0.534689
1177 0.566788
1178 0.525733
1179 0.530181
1180 0.542953
1181 0.536632
1182 0.543733
1183 0.538666
1184 0.543234
1185 0.533016
1186 0.543462
1187 0.539102
1188 0.558215
1189 0.534552
1190 0.553157
1191 0.562435
1192 0.559074
1193 0.53139
1194 0.564862
1195 0.536379
1196 0.537268
1197 0.541944
1198 0.558069
1199 0.537906
1200 0.518396
1201 0.728932
1202 0.531467
1203 0.713831
1204 0.707473
1205 0.723002
1206 0.750822
1207 0.732206
1208 0.721117
1209 0.722637
1210 0.717043
1211 0.71154
1212 0.740327
1213 0.716707
1214 0.706939
1215 0.707705
1216 0.719949
1217 0.704341
1218 0.738471
1219 0.712727
1220 0.707314
1221 0.688225
1222 0.707347
1223 0.730047
1224 0.722639
1225 0.723277
1226 0.719786
1227 0.704174
1228 0.703807
1229 0.711879
1230 0.745769
1231 0.739641
1232 0.72037
1233 0.714209
1234 0.745692
1235 0.73669
1236 0.70767
1237 0.713549
1238 0.703625
1239 0.762156
1240 0.723162
1241 0.743335
1242 0.726829
1243 0.738117
1244 0.725566
1245 0.732078
1246 0.720434
1247 0.729501
1248 0.732223
1249 0.709618
1250 0.729445
1251 0.705649
1252 0.718664
1253 0.707024
1254 0.698997
1255 0.709769
1256 0.711564
1257 0.729352
1258 0.719961
1259 0.729903
1260 0.728131
1261 0.722801
1262 0.731664
1263 0.743363
1264 0.727455
1265 0.725985
1266 0.694772
1267 0.724386
1268 0.736154
1269 0.724841
1270 0.732641
1271 0.738356
1272 0.711212
1273 0.718071
1274 0.706707
1275 0.72554
1276 0.739269
1277 0.743801
1278 0.728407
1279 0.740074
1280 0.718904
1281 0.734287
1282 0.733742
1283 0.721732
1284 0.739418
1285 0.736751
1286 0.709679
1287 0.719346
1288 0.709169
1289 0.710325
1290 0.723813
1291 0.725834
1292 0.732377
1293 0.710766
1294 0.718061
1295 0.741711
1296 0.719029
1297 0.72566
1298 0.708098
1299 0.719008
1300 0.70646
1301 0.702104
1302 0.720067
1303 0.70143
1304 0.730177
1305 0.714955
1306 0.682163
1307 0.72516
1308 0.711114
1309 0.732431
1310 0.710334
1311 0.712951
1312 0.738652
1313 0.713309
1314 0.752716
1315 0.717806
1316 0.723734
1317 0.699546
1318 0.718217
1319 0.725834
1320 0.732555
1321 0.707995
1322 0.719965
1323 0.714308
1324 0.724069
1325 0.720178
1326 0.735007
1327 0.723284
1328 0.729636
1329 0.730073
1330 0.751616
1331 0.721425
1332 0.717858
1333 0.734938
1334 0.718017
1335 0.71826
1336 0.743686
1337 0.72307
1338 0.708073
1339 0.724993
1340 0.699676
1341 0.71573
1342 0.702862
1343 0.712298
1344 0.704993
1345 0.73361
1346 0.726899
1347 0.720867
1348 0.716291
1349 0.721119
1350 0.741379
1351 0.724057
1352 0.714863
1353 0.723977
1354 0.734851
1355 0.726504
1356 0.705032
1357 0.70794
1358 0.732126
1359 0.692593
1360 0.727945
1361 0.720081
1362 0.707685
1363 0.743822
1364 0.714998
1365 0.715608
1366 0.736786
1367 0.725694
1368 0.718758
1369 0.729831
1370 0.720943
1371 0.725977
1372 0.72704
1373 0.725828
1374 0.72372
1375 0.734058
1376 0.723157
1377 0.720301
1378 0.759195
1379 0.72381
1380 0.73135
1381 0.68813
1382 0.7166
1383 0.712016
1384 0.731225
1385 0.727614
1386 0.730241
1387 0.703209
1388 0.731038
1389 0.718762
1390 0.693583
1391 0.713147
1392 0.721882
1393 0.732577
1394 0.725238
1395 0.730846
1396 0.735776
1397 0.706074
1398 0.727886
1399 0.730693
1400 0.723507
1401 0.727045
1402 0.727349
1403 0.714209
1404 0.722354
1405 0.737368
1406 0.730101
1407 0.720002
1408 0.702423
1409 0.71173
1410 0.718989
1411 0.719935
1412 0.707015
1413 0.731788
1414 0.720116
1415 0.716701
1416 0.734716
1417 0.74077
1418 0.718425
1419 0.745303
1420 0.715313
1421 0.741004
1422 0.719142
1423 0.723275
1424 0.717996
1425 0.724256
1426 0.726719
1427 0.724525
1428 0.738039
1429 0.719218
1430 0.729592
1431 0.703094
1432 0.743329
1433 0.751511
1434 0.726417
1435 0.765613
1436 0.744034
1437 0.723301
1438 0.739906
1439 0.750475
1440 0.73755
1441 0.704845
1442 0.726141
1443 0.740603
1444 0.741671
1445 0.739377
1446 0.729543
1447 0.740839
1448 0.735476
1449 0.726234
1450 0.736537
1451 0.7332
1452 0.726373
1453 0.726719
1454 0.726726
1455 0.727939
1456 0.735365
1457 0.731862
1458 0.730783
1459 0.759401
1460 0.738645
1461 0.711547
1462 0.713447
1463 0.70563
1464 0.735553
1465 0.727957
1466 0.715008
1467 0.705851
1468 0.7294
1469 0.715052
1470 0.738252
1471 0.721358
1472 0.712476
1473 0.713246
1474 0.735296
1475 0.741938
1476 0.730254
1477 0.739614
1478 0.735127
1479 0.744398
1480 0.71608
1481 0.732088
1482 0.728658
1483 0.716895
1484 0.720852
1485 0.738844
1486 0.720107
1487 0.725846
1488 0.748185
1489 0.732161
1490 0.726846
1491 0.7171
1492 0.750334
1493 0.726888
1494 0.720945
1495 0.739185
1496 0.746693
1497 0.725888
1498 0.725105
1499 0.710212
1500 0.718726
1501 0.752821
1502 0.741356
1503 0.887331
1504 0.911467
1505 0.924048
1506 0.920394
1507 0.917859
1508 0.88679
1509 0.899614
1510 0.903747
1511 0.915088
1512 0.928335
1513 0.913388
1514 0.915188
1515 0.917814
1516 0.953249
1517 0.920064
1518 0.896518
1519 0.914913
1520 0.931109
1521 0.919904
1522 0.904817
1523 0.895892
1524 0.892756
1525 0.895779
1526 0.919791
1527 0.912909
1528 0.905986
1529 0.91242
1530 0.924481
1531 0.901798
1532 0.878383
1533 0.915089
1534 0.898601
1535 0.907622
1536 0.898661
1537 0.928264
1538 0.899502
1539 0.909925
1540 0.918226
1541 0.914632
1542 0.907346
1543 0.909161
1544 0.9229
1545 0.910034
1546 0.93056
1547 0.901397
1548 0.908844
1549 0.91399
1550 0.915883
1551 0.890524
1552 0.91528
1553 0.920515
1554 0.898892
1555 0.919519
1556 0.905811
1557 0.895282
1558 0.898045
1559 0.890031
1560 0.905575
1561 0.936159
1562 0.932145
1563 0.907587
1564 0.912973
1565 0.892345
1566 0.907814
1567 0.906765
1568 0.917264
1569 0.894034
1570 0.92451
1571 0.900893
1572 0.927699
1573 0.895351
1574 0.909188
1575 0.917031
1576 0.900225
1577 0.918581
1578 0.899135
1579 0.932754
1580 0.901772
1581 0.90628
1582 0.901646
1583 0.939324
1584 0.933722
1585 0.897924
1586 0.908381
1587 0.877268
1588 0.933835
1589 0.8941
1590 0.934567
1591 0.922128
1592 0.905913
1593 0.905917
1594 0.904158
1595 0.900729
1596 0.904358
1597 0.923009
1598 0.917123
1599 0.888909
1600 0.906415
1601 0.906302
1602 0.873098
1603 0.918839
1604 0.924504
1605 0.926212
1606 0.909338
1607 0.882246
1608 0.90437
1609 0.901056
1610 0.918174
1611 0.902691
1612 0.915199
1613 0.897932
1614 0.902543
1615 0.919165
1616 0.895219
1617 0.895772
1618 0.917877
1619 0.890416
1620 0.89729
1621 0.939249
1622 0.912459
1623 0.902676
1624 0.899131
1625 0.931396
1626 0.874854
1627 0.920705
1628 0.903864
1629 0.897065
1630 0.887277
1631 0.93217
1632 0.91115
1633 0.919139
1634 0.921631
1635 0.908424
1636 0.910845
1637 0.945104
1638 0.92194
1639 0.899048
1640 0.906861
1641 0.905705
1642 0.908234
1643 0.897144
1644 0.907609
1645 0.905857
1646 0.899504
1647 0.91406
1648 0.930044
1649 0.889169
1650 0.900783
1651 0.882137
1652 0.934381
1653 0.90152
1654 0.919902
1655 0.90561
1656 0.913668
1657 0.892352
1658 0.916176
1659 0.922423
1660 0.887594
1661 0.909925
1662 0.932214
1663 0.912606
1664 0.896956
1665 0.908913
1666 0.896024
1667 0.885603
1668 0.909359
1669 0.913953
1670 0.905518
1671 0.892236
1672 0.900882
1673 0.906887
1674 0.889513
1675 0.917319
1676 0.938697
1677 0.899297
1678 0.903531
1679 0.900301
1680 0.877438
1681 0.920462
1682 0.904192
1683 0.91825
1684 0.881245
1685 0.891622
1686 0.90086
1687 0.876165
1688 0.890157
1689 0.883726
1690 0.895649
1691 0.897957
1692 0.910601
1693 0.913331
1694 0.903264
1695 0.902738
1696 0.91858
1697 0.914508
1698 0.915343
1699 0.918269
1700 0.911686
1701 0.923724
1702 0.897999
1703 0.907833
1704 0.890089
1705 0.914992
1706 0.909671
1707 0.881711
1708 0.91191
1709 0.916295
1710 0.891667
1711 0.902042
1712 0.906106
1713 0.897039
1714 0.903917
1715 0.90158
1716 0.894809
1717 0.913809
1718 0.900734
1719 0.906689
1720 0.902298
1721 0.881654
1722 0.882212
1723 0.914666
1724 0.901008
1725 0.924831
1726 0.905138
1727 0.936126
1728 0.897136
1729 0.936976
1730 0.903791
1731 0.911631
1732 0.920083
1733 0.924353
1734 0.898826
1735 0.918328
1736 0.890292
1737 0.93471
1738 0.910201
1739 0.906164
1740 0.916335
1741 0.896235
1742 0.933461
1743 0.903636
1744 0.921854
1745 0.901667
1746 0.891349
1747 0.909842
1748 0.90986
1749 0.885837
1750 0.931705
1751 0.899263
1752 0.906606
1753 0.89562
1754 0.892979
1755 0.890315
1756 0.899972
1757 0.925624
1758 0.910495
1759 0.898939
1760 0.918631
1761 0.920125
1762 0.895577
1763 0.898019
1764 0.891965
1765 0.933893
1766 0.919008
1767 0.908823
1768 0.909372
1769 0.898054
1770 0.874247
1771 0.909137
1772 0.91627
1773 0.934317
1774 0.892775
1775 0.914411
1776 0.898886
1777 0.937597
1778 0.920117
1779 0.901245
1780 0.894659
1781 0.91618
1782 0.910601
1783 0.896136
1784 0.900474
1785 0.878966
1786 0.900757
1787 0.892603
1788 0.922281
1789 0.932817
1790 0.896989
1791 0.913995
1792 0.88075
1793 0.899695
1794 0.896035
1795 0.907414
1796 0.875636
1797 0.875293
1798 0.895787
1799 0.926888
1800 0.911418
1801 0.891197
1802 0.929255
1803 1.109347
1804 1.079128
1805 1.077259
1806 1.06945
1807 1.068884
1808 1.068768
1809 1.106668
1810 1.099391
1811 1.121023
1812 1.076794
1813 1.065572
1814 1.087365
1815 1.099208
1816 1.063252
1817 1.070964
1818 1.082711
1819 1.084576
1820 1.078396
1821 1.102661
1822 1.097654
1823 1.09288
1824 1.100234
1825 1.10592
1826 1.082738
1827 1.077165
1828 1.111963
1829 1.103718
1830 1.087507
1831 1.119927
1832 1.095913
1833 1.110715
1834 1.093821
1835 1.096404
1836 1.081253
1837 1.086403
1838 1.076563
1839 1.098335
1840 1.083655
1841 1.074129
1842 1.115973
1843 1.087795
1844 1.097357
1845 1.094941
1846 1.103713
1847 1.076751
1848 1.09754
1849 1.088839
1850 1.093069
1851 1.100143
1852 1.092262
1853 1.097394
1854 1.10585
1855 1.095557
1856 1.095833
1857 1.090097
1858 1.074489
1859 1.104128
1860 1.069353
1861 1.109952
1862 1.093244
1863 1.089815
1864 1.101406
1865 1.090007
1866 1.108179
1867 1.101613
1868 1.106362
1869 1.082527
1870 1.105379
1871 1.073507
1872 1.09259
1873 1.103621
1874 1.081998
1875 1.084909
1876 1.103099
1877 1.114501
1878 1.087968
1879 1.085538
1880 1.084521
1881 1.095448
1882 1.095401
1883 1.077391
1884 1.083622
1885 1.079917
1886 1.092922
1887 1.103099
1888 1.087656
1889 1.089071
1890 1.086347
1891 1.082032
1892 1.100261
1893 1.072546
1894 1.110417
1895 1.098449
1896 1.103222
1897 1.087276
1898 1.092188
1899 1.084118
1900 1.099162
1901 1.108091
1902 1.089674
1903 1.093898
1904 1.07403
1905 1.094285
1906 1.087314
1907 1.08864
1908 1.086558
1909 1.080005
1910 1.090462
1911 1.094035
1912 1.106778
1913 1.095375
1914 1.091992
1915 1.111115
1916 1.09791
1917 1.088377
1918 1.084095
1919 1.093672
1920 1.091384
1921 1.097748
1922 1.09074
1923 1.062886
1924 1.111307
1925 1.075776
1926 1.10156
1927 1.1007
1928 1.094992
1929 1.114142
1930 1.086655
1931 1.112057
1932 1.10289
1933 1.063712
1934 1.084768
1935 1.109256
1936 1.079013
1937 1.111983
1938 1.103352
1939 1.095774
1940 1.113863
1941 1.066894
1942 1.097662
1943 1.079181
1944 1.103536
1945 1.089123
1946 1.103343
1947 1.089411
1948 1.098033
1949 1.100462
1950 1.085307
1951 1.089831
1952 1.105576
1953 1.096328
1954 1.10366
1955 1.084337
1956 1.081133
1957 1.102556
1958 1.084135
1959 1.08374
1960 1.094092
1961 1.096984
1962 1.116367
1963 1.095771
1964 1.104473
1965 1.074365
1966 1.096572
1967 1.112149
1968 1.093728
1969 1.095067
1970 1.099594
1971 1.10425
1972 1.087241
1973 1.093339
1974 1.085403
1975 1.084389
1976 1.093591
1977 1.098322
1978 1.08628
1979 1.101361
1980 1.121092
1981 1.120353
1982 1.094823
1983 1.103678
1984 1.096989
1985 1.082261
1986 1.071015
1987 1.120775
1988 1.098171
1989 1.111326
1990 1.087165
1991 1.122909
1992 1.11382
1993 1.092012
1994 1.096914
1995 1.08453
1996 1.095872
1997 1.099098
1998 1.116903
1999 1.102904
2000 1.101076
2001 1.09304
2002 1.096159
2003 1.080352
2004 1.087512
2005 1.103543
2006 1.098273
2007 1.093815
2008 1.094494
2009 1.095307
2010 1.086687
2011 1.091765
2012 1.101107
2013 1.100352
2014 1.113351
2015 1.088411
2016 1.110444
2017 1.085932
2018 1.086469
2019 1.074133
2020 1.106719
2021 1.091878
2022 1.096188
2023 1.080892
2024 1.092201
2025 1.10021
2026 1.088504
2027 1.101337
2028 1.094961
2029 1.073276
2030 1.09125
2031 1.104945
2032 1.082399
2033 1.090913
2034 1.092865
2035 1.08924
2036 1.086486
2037 1.089152
2038 1.092348
2039 1.105484
2040 1.09722
2041 1.102732
2042 1.101526
2043 1.087835
2044 1.102066
2045 1.087838
2046 1.113998
2047 1.107547
2048 1.086434
2049 1.101241
2050 1.131747
2051 1.083286
2052 1.106927
2053 1.095252
2054 1.077692
2055 1.116748
2056 1.100013
2057 1.110897
2058 1.093109
2059 1.098678
2060 1.111515
2061 1.108668
2062 1.109228
2063 1.099079
2064 1.091473
2065 1.114959
2066 1.106879
2067 1.11583
2068 1.102198
2069 1.094333
2070 1.114051
2071 1.078308
2072 1.098757
2073 1.107913
2074 1.100019
2075 1.079767
2076 1.083413
2077 1.080507
2078 1.098725
2079 1.111573
2080 1.095896
2081 1.085164
2082 1.099668
2083 1.09402
2084 1.113631
2085 1.079272
2086 1.122783
2087 1.070044
2088 1.111464
2089 1.091805
2090 1.082732
2091 1.072836
2092 1.10343
2093 1.090427
2094 1.110745
2095 1.095459
2096 1.087284
2097 1.10647
2098 1.084035
2099 1.104627
2100 1.10776
2101 1.108211
2102 1.091814
2103 1.267649
2104 1.276391
2105 1.273193
2106 1.287272
2107 1.30515
2108 1.274482
2109 1.282877
2110 1.286788
2111 1.267698
2112 1.286107
2113 1.274903
2114 1.273585
2115 1.26001
2116 1.274621
2117 1.295591
2118 1.269414
2119 1.282116
2120 1.278599
2121 1.281875
2122 1.277842
2123 1.26826
2124 1.282428
2125 1.256998
2126 1.278757
2127 1.297318
2128 1.295593
2129 1.277661
2130 1.24478
2131 1.290357
2132 1.301062
2133 1.268678
2134 1.277849
2135 1.267454
2136 1.265034
2137 1.281121
2138 1.277482
2139 1.30044
2140 1.289898
2141 1.282406
2142 1.292452
2143 1.297327
2144 1.288705
2145 1.279531
2146 1.293986
2147 1.29188
2148 1.267534
2149 1.24665
2150 1.301082
2151 1.273811
2152 1.29295
2153 1.282763
2154 1.265066
2155 1.292541
2156 1.271573
2157 1.293099
2158 1.28896
2159 1.291957
2160 1.294688
2161 1.292704
2162 1.298643
2163 1.293677
2164 1.272147
2165 1.275948
2166 1.278986
2167 1.277232
2168 1.288323
2169 1.264099
2170 1.290672
2171 1.278303
2172 1.312264
2173 1.319577
2174 1.264542
2175 1.272974
2176 1.285283
2177 1.258822
2178 1.282511
2179 1.300424
2180 1.268246
2181 1.293445
2182 1.292665
2183 1.262782
2184 1.296343
2185 1.270317
2186 1.263672
2187 1.286977
2188 1.302336
2189 1.278692
2190 1.284971
2191 1.300665
2192 1.263141
2193 1.25291
2194 1.281188
2195 1.280195
2196 1.274928
2197 1.290335
2198 1.246719
2199 1.267988
2200 1.265294
2201 1.255681
2202 1.27752
2203 1.293311
2204 1.286475
2205 1.299474
2206 1.267745
2207 1.295239
2208 1.278095
2209 1.26103
2210 1.275424
2211 1.268372
2212 1.268919
2213 1.288465
2214 1.290708
2215 1.309201
2216 1.284586
2217 1.278357
2218 1.265852
2219 1.282768
2220 1.286247
2221 1.277462
2222 1.27973
2223 1.293084
2224 1.276505
2225 1.290596
2226 1.257972
2227 1.269512
2228 1.268963
2229 1.282758
2230 1.275535
2231 1.27528
2232 1.2782
2233 1.284278
2234 1.282076
2235 1.286745
2236 1.291957
2237 1.30046
2238 1.277101
2239 1.290291
2240 1.28544
2241 1.304109
2242 1.272556
2243 1.281969
2244 1.284044
2245 1.282212
2246 1.284029
2247 1.255064
2248 1.278305
2249 1.277301
2250 1.280912
2251 1.289391
2252 1.286891
2253 1.275208
2254 1.275826
2255 1.283153
2256 1.30908
2257 1.268345
2258 1.284938
2259 1.277095
2260 1.281695
2261 1.273407
2262 1.267366
2263 1.279487
2264 1.27183
2265 1.290419
2266 1.261459
2267 1.292222
2268 1.291039
2269 1.297634
2270 1.286261
2271 1.253349
2272 1.281074
2273 1.282949
2274 1.27887
2275 1.261979
2276 1.281008
2277 1.268712
2278 1.255692
2279 1.266177
2280 1.26096
2281 1.270197
2282 1.258101
2283 1.263068
2284 1.283394
2285 1.262076
2286 1.268206
2287 1.304029
2288 1.264689
2289 1.302508
2290 1.272806
2291 1.256832
2292 1.285851
2293 1.289056
2294 1.287445
2295 1.263935
2296 1.308792
2297 1.279462
2298 1.263096
2299 1.282467
2300 1.285645
2301 1.277172
2302 1.283294
2303 1.268018
2304 1.290639
2305 1.269798
2306 1.282966
2307 1.305875
2308 1.274385
2309 1.258736
2310 1.263536
2311 1.249933
2312 1.277576
2313 1.27053
2314 1.277429
2315 1.268239
2316 1.275482
2317 1.280646
2318 1.276625
2319 1.281023
2320 1.277202
2321 1.286536
2322 1.298947
2323 1.277457
2324 1.284725
2325 1.253224
2326 1.26797
2327 1.295941
2328 1.293791
2329 1.269498
2330 1.278052
2331 1.288136
2332 1.286928
2333 1.29148
2334 1.28137
2335 1.289582
2336 1.279345
2337 1.288715
2338 1.284587
2339 1.280611
2340 1.29485
2341 1.292467
2342 1.260305
2343 1.289461
2344 1.270633
2345 1.267909
2346 1.274723
2347 1.288219
2348 1.266959
2349 1.292584
2350 1.276645
2351 1.289141
2352 1.270868
2353 1.265061
2354 1.273682
2355 1.31632
2356 1.273974
2357 1.248176
2358 1.291292
2359 1.297862
2360 1.278669
2361 1.276618
2362 1.277264
2363 1.2769
2364 1.268736
2365 1.274192
2366 1.278416
2367 1.292114
2368 1.270035
2369 1.27813
2370 1.254414
2371 1.250407
2372 1.267624
2373 1.277513
2374 1.27396
2375 1.300143
2376 1.28446
2377 1.254953
2378 1.284241
2379 1.269163
2380 1.277181
2381 1.261017
2382 1.289093
2383 1.290117
2384 1.266347
2385 1.25148
2386 1.276073
2387 1.268644
2388 1.297417
2389 1.265575
2390 1.273554
2391 1.252639
2392 1.265726
2393 1.280607
2394 1.294858
2395 1.288532
2396 1.283041
2397 1.287904
2398 1.279969
2399 1.290732
2400 1.27724
2401 1.273984
2402 1.271648
2403 1.344073
2404 1.351466
2405 1.381009
2406 1.349744
2407 1.36661
2408 1.376484
2409 1.35685
2410 1.379152
2411 1.37219
2412 1.384726
2413 1.393956
2414 1.387036
2415 1.381516
2416 1.386355
2417 1.373302
2418 1.368056
2419 1.377583
2420 1.376539
2421 1.358024
2422 1.377162
2423 1.374109
2424 1.381052
2425 1.360044
2426 1.378612
2427 1.354212
2428 1.391183
2429 1.379223
2430 1.386776
2431 1.354058
2432 1.363778
2433 1.381276
2434 1.370752
2435 1.352049
2436 1.378504
2437 1.353395
2438 1.356507
2439 1.34921
2440 1.362078
2441 1.381622
2442 1.389476
2443 1.369201
2444 1.353251
2445 1.365332
2446 1.362806
2447 1.350915
2448 1.377005
2449 1.36013
2450 1.372715
2451 1.373568
2452 1.369596
2453 1.376972
2454 1.3654
2455 1.376718
2456 1.376354
2457 1.357191
2458 1.37515
2459 1.372443
2460 1.353073
2461 1.388404
2462 1.361127
2463 1.350175
2464 1.373335
2465 1.370435
2466 1.366597
2467 1.374404
2468 1.377392
2469 1.364384
2470 1.380183
2471 1.390285
2472 1.368642
2473 1.363779
2474 1.384318
2475 1.350082
2476 1.333304
2477 1.378694
2478 1.380218
2479 1.368578
2480 1.389792
2481 1.364709
2482 1.3832
2483 1.346689
2484 1.34162
2485 1.370345
2486 1.336181
2487 1.37096
2488 1.368919
2489 1.364346
2490 1.357121
2491 1.39311
2492 1.373186
2493 1.373054
2494 1.343571
2495 1.397417
2496 1.341143
2497 1.373805
2498 1.356007
2499 1.329737
2500 1.36559
2501 1.379575
2502 1.365188
2503 1.353672
2504 1.368207
2505 1.365359
2506 1.376433
2507 1.368344
2508 1.37814
2509 1.356566
2510 1.363206
2511 1.366873
2512 1.349754
2513 1.360923
2514 1.357111
2515 1.361341
2516 1.360005
2517 1.383175
2518 1.346423
2519 1.378032
2520 1.384725
2521 1.364213
2522 1.357777
2523 1.381802
2524 1.348547
2525 1.358766
2526 1.346585
2527 1.376296
2528 1.348374
2529 1.359034
2530 1.384195
2531 1.359713
2532 1.372087
2533 1.346623
2534 1.355941
2535 1.323427
2536 1.330333
2537 1.365836
2538 1.359566
2539 1.363589
2540 1.36525
2541 1.379923
2542 1.391386
2543 1.375156
2544 1.356731
2545 1.355391
2546 1.355709
2547 1.357982
2548 1.38412
2549 1.371941
2550 1.36046
2551 1.349167
2552 1.374172
2553 1.364945
2554 1.355799
2555 1.370153
2556 1.373351
2557 1.362349
2558 1.382179
2559 1.361615
2560 1.394279
2561 1.34263
2562 1.344516
2563 1.343412
2564 1.385943
2565 1.352047
2566 1.368833
2567 1.366752
2568 1.360581
2569 1.357272
2570 1.380946
2571 1.357371
2572 1.338499
2573 1.378258
2574 1.372272
2575 1.363472
2576 1.33886
2577 1.384381
2578 1.352932
2579 1.371037
2580 1.385004
2581 1.367248
2582 1.350692
2583 1.380587
2584 1.339828
2585 1.360142
2586 1.361201
2587 1.363905
2588 1.383764
2589 1.377116
2590 1.354893
2591 1.373661
2592 1.359146
2593 1.374995
2594 1.36794
2595 1.345854
2596 1.384043
2597 1.371102
2598 1.364772
2599 1.362315
2600 1.347615
2601 1.358691
2602 1.36435
2603 1.358832
2604 1.357548
2605 1.35525
2606 1.341333
2607 1.348464
2608 1.359351
2609 1.383432
2610 1.363751
2611 1.376395
2612 1.358762
2613 1.358964
2614 1.352422
2615 1.332519
2616 1.351295
2617 1.340357
2618 1.366267
2619 1.380103
2620 1.378891
2621 1.373512
2622 1.344422
2623 1.36007
2624 1.328137
2625 1.338886
2626 1.360282
2627 1.357074
2628 1.376858
2629 1.386923
2630 1.376846
2631 1.373328
2632 1.352218
2633 1.348673
2634 1.352251
2635 1.371236
2636 1.354421
2637 1.373808
2638 1.3816
2639 1.368799
2640 1.364821
2641 1.371566
2642 1.372866
2643 1.359413
2644 1.357364
2645 1.327158
2646 1.372003
2647 1.363169
2648 1.364905
2649 1.350478
2650 1.364097
2651 1.34207
2652 1.347731
2653 1.348601
2654 1.340943
2655 1.347993
2656 1.350297
2657 1.372154
2658 1.350724
2659 1.361671
2660 1.344642
2661 1.372137
2662 1.370669
2663 1.367947
2664 1.342577
2665 1.364065
2666 1.368856
2667 1.379479
2668 1.362999
2669 1.368348
2670 1.375951
2671 1.335002
2672 1.378176
2673 1.364891
2674 1.350117
2675 1.362606
2676 1.341018
2677 1.37534
2678 1.354219
2679 1.354457
2680 1.364931
2681 1.349286
2682 1.389846
2683 1.366871
2684 1.350808
2685 1.337836
2686 1.369058
2687 1.366146
2688 1.353293
2689 1.373115
2690 1.349973
2691 1.357303
2692 1.345343
2693 1.353138
2694 1.390004
2695 1.350495
2696 1.358829
2697 1.357034
2698 1.35645
2699 1.368063
2700 1.34802
2701 1.372667
2702 1.352744
2703 1.332095
2704 1.343192
2705 1.358979
2706 1.351671
2707 1.364255
2708 1.349851
2709 1.349003
2710 1.359472
2711 1.384174
2712 1.364661
2713 1.349485
2714 1.366772
2715 1.36198
2716 1.373891
2717 1.345978
2718 1.369771
2719 1.350088
2720 1.36728
2721 1.354161
2722 1.330449
2723 1.358969
2724 1.356014
2725 1.369672
2726 1.364006
2727 1.375964
2728 1.354157
2729 1.36402
2730 1.364095
2731 1.383652
2732 1.360067
2733 1.342442
2734 1.342922
2735 1.355251
2736 1.35799
2737 1.349011
2738 1.353541
2739 1.381791
2740 1.354784
2741 1.348192
2742 1.369943
2743 1.361112
2744 1.348965
2745 1.36232
2746 1.366563
2747 1.349837
2748 1.368229
2749 1.35545
2750 1.360036
2751 1.342652
2752 1.367803
2753 1.373255
2754 1.37018
2755 1.372115
2756 1.392205
2757 1.359823
2758 1.370144
2759 1.363861
2760 1.372383
2761 1.380974
2762 1.366704
2763 1.355309
2764 1.375442
2765 1.367715
2766 1.379956
2767 1.356518
2768 1.398791
2769 1.378464
2770 1.382011
2771 1.388599
2772 1.374658
2773 1.365143
2774 1.383488
2775 1.375935
2776 1.380986
2777 1.37222
2778 1.390159
2779 1.345499
2780 1.391668
2781 1.351955
2782 1.345459
2783 1.37114
2784 1.351218
2785 1.344965
2786 1.362656
2787 1.344972
2788 1.370733
2789 1.368241
2790 1.370808
2791 1.373809
2792 1.34965
2793 1.357995
2794 1.365212
2795 1.36279
2796 1.350174
2797 1.356347
2798 1.359846
2799 1.356083
2800 1.366961
2801 1.367209
2802 1.36522
2803 1.387012
2804 1.34668
2805 1.353159
2806 1.365525
2807 1.348054
2808 1.38066
2809 1.370252
2810 1.358635
2811 1.355865
2812 1.346094
2813 1.366653
2814 1.337878
2815 1.353723
2816 1.369917
2817 1.368489
2818 1.367701
2819 1.359972
2820 1.378716
2821 1.382264
2822 1.332249
2823 1.367892
2824 1.373779
2825 1.377652
2826 1.366851
2827 1.363106
2828 1.355615
2829 1.36935
2830 1.369456
2831 1.366195
2832 1.359548
2833 1.351265
2834 1.384302
2835 1.363483
2836 1.346258
2837 1.394692
2838 1.376216
2839 1.352428
2840 1.359084
2841 1.344865
2842 1.359362
2843 1.365955
2844 1.353595
2845 1.381063
2846 1.384236
2847 1.351646
2848 1.349017
2849 1.387521
2850 1.38426
2851 1.370001
2852 1.351592
2853 1.35611
2854 1.356146
2855 1.359576
2856 1.352748
2857 1.362122
2858 1.361061
2859 1.369102
2860 1.349156
2861 1.376651
2862 1.3414
2863 1.363688
2864 1.378823
2865 1.349816
2866 1.346627
2867 1.329228
2868 1.35844
2869 1.354832
2870 1.349194
2871 1.340934
2872 1.347338
2873 1.360011
2874 1.341011
2875 1.366971
2876 1.344491
2877 1.365009
2878 1.364337
2879 1.348686
2880 1.370215
2881 1.371244
2882 1.354517
2883 1.356615
2884 1.322453
2885 1.358674
2886 1.361401
2887 1.342695
2888 1.370567
2889 1.34347
2890 1.358461
2891 1.337205
2892 1.365375
2893 1.346373
2894 1.348587
2895 1.354057
2896 1.372666
2897 1.355322
2898 1.364222
2899 1.359707
2900 1.359247
2901 1.364166
2902 1.376123
2903 1.342152
2904 1.360936
2905 1.364697
2906 1.329695
2907 1.349232
2908 1.366466
2909 1.378391
2910 1.368886
2911 1.361626
2912 1.331584
2913 1.360032
2914 1.35559
2915 1.345465
2916 1.361725
2917 1.363201
2918 1.360609
2919 1.346462
2920 1.327519
2921 1.364853
2922 1.351018
2923 1.363283
2924 1.341605
2925 1.37145
2926 1.362293
2927 1.355082
2928 1.384603
2929 1.345803
2930 1.368556
2931 1.359019
2932 1.358004
2933 1.355582
2934 1.351882
2935 1.374121
2936 1.360355
2937 1.33387
2938 1.337929
2939 1.357407
2940 1.360701
2941 1.361187
2942 1.340557
2943 1.325448
2944 1.334698
2945 1.35858
2946 1.367398
2947 1.350689
2948 1.345358
2949 1.338005
2950 1.344608
2951 1.353282
2952 1.329611
2953 1.341514
2954 1.331988
2955 1.366403
2956 1.356961
2957 1.371377
2958 1.341417
2959 1.330098
2960 1.349778
2961 1.320507
2962 1.345132
2963 1.348724
2964 1.375219
2965 1.338109
2966 1.35615
2967 1.336291
2968 1.35789
2969 1.382063
2970 1.355308
2971 1.358823
2972 1.360779
2973 1.348101
2974 1.374939
2975 1.34732
2976 1.35923
2977 1.340553
2978 1.384853
2979 1.362716
2980 1.356523
2981 1.367372
2982 1.335138
2983 1.36093
2984 1.360643
2985 1.352089
2986 1.349129
2987 1.33903
2988 1.353612
2989 1.376534
2990 1.343153
2991 1.372953
2992 1.371879
2993 1.319337
2994 1.343744
2995 1.375794
2996 1.348059
2997 1.357366
2998 1.345289
2999 1.366647
3000 1.369099
3001 1.374238
