# Supplementary material for: The role of scaffold reshaping and disassembly in dynamin driven membrane fission
Source: eLife journal article supplement (doi:10.7554/elife.39441), 2018-12-18
Supplement: supp [file elife-39441-supp-v1.zip › elife_poa_e39441_Figure_6_source_data_2.txt]

#  DATA FILE for Fig. 6 in the paper
#
#      "The role of scaffold reshaping and disassembly
#       in dynamin driven membrane fission"
#
#  by Martina Pannuzzo, Zachary A. McDargh, and Markus Deserno
#
#  published in eLife
#
#  -------------------------------------------------------------
#  time evolution of scaffold helical pitch 2 pi p
#  -------------------------------------------------------------
#  
#  Column 1: t       (time of simulation, in units of tau)
#  Column 2: 2 pi p  (helical pitch of dynamin scaffold, in units of sigma)
#
0 11.78          
1 11.78          
2 11.78          
3 11.76          
4 11.65          
5 11.87          
6 11.62          
7 11.89          
8 11.77          
9 11.43          
10 11.25          
11 11.43          
12 11.75          
13 11.73          
14 11.55          
15 11.85          
16 11.61          
17 11.65          
18 11.71          
19 11.72          
20 11.83          
21 11.53          
22 11.55          
23 11.77          
24 11.72          
25 11.89          
26 11.6          
27 11.63          
28 11.59          
29 11.56          
30 11.46          
31 11.5          
32 11.63          
33 11.65          
34 11.81          
35 11.58          
36 11.59          
37 11.74          
38 11.78          
39 11.95          
40 11.66          
41 11.59          
42 11.89          
43 11.6          
44 11.54          
45 11.78          
46 11.51          
47 11.58          
48 11.63          
49 11.96          
50 11.67          
51 11.67          
52 11.75          
53 11.93          
54 11.53          
55 11.64          
56 11.62          
57 11.73          
58 11.62          
59 11.37          
60 11.64          
61 11.79          
62 11.85          
63 12.12          
64 11.53          
65 11.68          
66 11.51          
67 11.83          
68 11.62          
69 11.83          
70 11.75          
71 11.87          
72 11.53          
73 11.87          
74 11.79          
75 11.88          
76 11.81          
77 11.91          
78 11.65          
79 11.76          
80 11.72          
81 11.58          
82 11.64          
83 11.71          
84 11.85          
85 11.54          
86 11.59          
87 11.39          
88 11.43          
89 11.58          
90 11.71          
91 11.7          
92 11.57          
93 11.83          
94 11.67          
95 11.48          
96 11.79          
97 11.39          
98 11.82          
99 11.74          
100 11.63          
101 11.69          
102 11.91          
103 11.58          
104 11.69          
105 11.57          
106 11.79          
107 11.75          
108 11.62          
109 11.78          
110 11.68          
111 11.52          
112 11.5          
113 11.95          
114 11.6          
115 11.57          
116 11.45          
117 11.44          
118 11.86          
119 11.74          
120 11.96          
121 11.98          
122 11.81          
123 11.71          
124 11.24          
125 11.55          
126 11.64          
127 11.73          
128 11.48          
129 11.83          
130 11.46          
131 11.58          
132 11.58          
133 11.51          
134 11.57          
135 11.87          
136 11.61          
137 11.73          
138 11.67          
139 11.79          
140 11.57          
141 11.88          
142 11.98          
143 11.85          
144 11.7          
145 11.52          
146 11.94          
147 11.86          
148 11.83          
149 11.51          
150 11.71          
151 11.61          
152 11.74          
153 11.71          
154 11.88          
155 11.58          
156 11.62          
157 11.57          
158 11.75          
159 11.71          
160 11.64          
161 11.82          
162 11.56          
163 11.72          
164 11.76          
165 11.56          
166 11.82          
167 11.71          
168 11.63          
169 11.71          
170 11.56          
171 11.89          
172 11.63          
173 11.91          
174 11.91          
175 11.74          
176 11.92          
177 11.53          
178 11.85          
179 11.63          
180 11.58          
181 11.65          
182 12.15          
183 11.53          
184 11.7          
185 12.11          
186 11.75          
187 11.41          
188 11.46          
189 11.49          
190 11.63          
191 11.41          
192 11.5          
193 11.97          
194 11.62          
195 11.83          
196 11.98          
197 11.76          
198 11.99          
199 11.67          
200 11.74          
201 11.88          
202 11.68          
203 11.79          
204 11.59          
205 11.8          
206 11.46          
207 11.67          
208 11.83          
209 11.86          
210 11.89          
211 11.64          
212 11.83          
213 11.39          
214 11.55          
215 11.93          
216 12.01          
217 11.58          
218 11.55          
219 11.43          
220 11.58          
221 11.92          
222 11.89          
223 11.7          
224 11.36          
225 11.75          
226 11.74          
227 11.82          
228 11.7          
229 11.52          
230 11.59          
231 11.62          
232 11.57          
233 11.81          
234 11.7          
235 12.21          
236 11.96          
237 11.62          
238 11.82          
239 11.51          
240 11.74          
241 11.77          
242 11.69          
243 11.75          
244 11.67          
245 11.69          
246 11.98          
247 11.74          
248 11.83          
249 11.66          
250 11.73          
251 11.86          
252 11.82          
253 11.71          
254 11.62          
255 11.45          
256 11.72          
257 11.77          
258 11.58          
259 11.94          
260 11.8          
261 11.47          
262 11.89          
263 11.67          
264 11.44          
265 11.73          
266 11.8          
267 11.56          
268 11.69          
269 11.74          
270 11.46          
271 11.84          
272 11.67          
273 12.17          
274 11.73          
275 11.95          
276 11.71          
277 11.59          
278 11.65          
279 11.65          
280 11.58          
281 11.75          
282 11.6          
283 11.62          
284 11.97          
285 11.69          
286 11.54          
287 11.97          
288 11.4          
289 11.63          
290 11.42          
291 11.72          
292 11.61          
293 11.73          
294 11.71          
295 11.86          
296 11.62          
297 11.84          
298 11.8          
299 11.64          
300 11.51          
301 11.79          
302 11.78          
303 12.07          
304 11.76          
305 11.7          
306 11.76          
307 11.57          
308 12.06          
309 11.97          
310 12.17          
311 11.88          
312 11.99          
313 11.76          
314 11.81          
315 12.25          
316 11.67          
317 11.63          
318 11.62          
319 11.64          
320 12.25          
321 11.85          
322 11.55          
323 11.8          
324 11.83          
325 11.85          
326 11.84          
327 12.08          
328 12.08          
329 11.69          
330 12.02          
331 11.52          
332 12.11          
333 11.75          
334 11.74          
335 11.8          
336 11.6          
337 11.73          
338 12.04          
339 11.69          
340 12.1          
341 11.88          
342 11.62          
343 11.79          
344 11.8          
345 11.56          
346 11.77          
347 11.84          
348 11.87          
349 12.01          
350 11.96          
351 11.87          
352 11.91          
353 11.91          
354 11.69          
355 11.59          
356 12.19          
357 11.5          
358 11.77          
359 11.97          
360 11.66          
361 11.56          
362 11.56          
363 11.66          
364 11.69          
365 12.2          
366 12.03          
367 11.69          
368 11.98          
369 11.94          
370 11.89          
371 11.77          
372 11.52          
373 11.99          
374 11.88          
375 11.9          
376 11.66          
377 11.54          
378 11.76          
379 11.58          
380 11.56          
381 11.68          
382 11.87          
383 11.8          
384 11.83          
385 11.64          
386 11.86          
387 11.79          
388 11.89          
389 12.47          
390 11.73          
391 12.27          
392 11.6          
393 11.84          
394 11.75          
395 11.68          
396 12.14          
397 11.53          
398 11.7          
399 11.87          
400 12.2          
401 11.75          
402 11.7          
403 11.83          
404 11.84          
405 11.63          
406 11.9          
407 11.75          
408 11.62          
409 12.01          
410 12.04          
411 12.03          
412 11.91          
413 11.63          
414 11.71          
415 11.88          
416 12.21          
417 11.46          
418 12.29          
419 11.65          
420 11.7          
421 11.8          
422 12.22          
423 11.68          
424 12.06          
425 11.69          
426 11.81          
427 11.92          
428 11.6          
429 11.51          
430 11.89          
431 11.54          
432 11.67          
433 11.65          
434 11.84          
435 12.05          
436 11.83          
437 11.71          
438 11.64          
439 12.13          
440 11.65          
441 11.72          
442 11.37          
443 11.82          
444 11.61          
445 12.15          
446 11.72          
447 11.6          
448 12.31          
449 11.7          
450 11.65          
451 12.14          
452 11.75          
453 11.89          
454 11.38          
455 11.87          
456 11.99          
457 11.47          
458 11.76          
459 12.04          
460 11.71          
461 11.97          
462 11.78          
463 11.71          
464 11.46          
465 11.64          
466 12          
467 11.97          
468 11.82          
469 11.98          
470 11.93          
471 11.65          
472 11.51          
473 12          
474 11.7          
475 12.59          
476 11.71          
477 11.41          
478 11.7          
479 11.79          
480 11.94          
481 11.78          
482 11.84          
483 11.82          
484 11.81          
485 12.21          
486 11.87          
487 11.71          
488 11.68          
489 11.87          
490 11.95          
491 11.75          
492 11.63          
493 11.52          
494 12.05          
495 11.57          
496 12.15          
497 12.09          
498 12.16          
499 11.99          
500 11.87          
501 12.45          
502 11.89          
503 12.22          
504 12.16          
505 11.87          
506 12.2          
507 12.15          
508 11.86          
509 11.69          
510 12.02          
511 11.89          
512 12.16          
513 11.61          
514 11.93          
515 11.68          
516 11.61          
517 11.85          
518 11.97          
519 11.91          
520 11.88          
521 11.93          
522 11.75          
523 11.85          
524 11.85          
525 11.97          
526 11.97          
527 11.73          
528 12.26          
529 11.82          
530 12.12          
531 11.53          
532 11.88          
533 11.79          
534 12.34          
535 11.98          
536 11.8          
537 11.86          
538 11.86          
539 11.65          
540 12.19          
541 11.97          
542 12.12          
543 11.91          
544 11.79          
545 11.89          
546 12.05          
547 12.15          
548 11.75          
549 11.64          
550 11.75          
551 11.81          
552 12.14          
553 11.41          
554 12.18          
555 11.69          
556 11.57          
557 11.96          
558 11.76          
559 11.59          
560 11.37          
561 11.75          
562 11.83          
563 11.98          
564 11.73          
565 11.86          
566 12.02          
567 11.8          
568 11.63          
569 11.96          
570 11.59          
571 11.76          
572 12.09          
573 11.79          
574 11.86          
575 11.8          
576 11.83          
577 11.66          
578 11.51          
579 11.98          
580 11.71          
581 12.03          
582 11.98          
583 11.86          
584 11.93          
585 11.98          
586 12.06          
587 11.79          
588 11.3          
589 11.91          
590 11.66          
591 11.96          
592 12.14          
593 11.97          
594 11.59          
595 11.94          
596 11.92          
597 11.85          
598 12.09          
599 11.96          
600 12          
601 11.76          
602 12.64          
603 12.72          
604 12.38          
605 12.58          
606 12.78          
607 12          
608 12.43          
609 12.54          
610 12.79          
611 12.81          
612 12.39          
613 12.53          
614 12.61          
615 12.74          
616 12.46          
617 12.22          
618 12.86          
619 12.77          
620 12.66          
621 12.81          
622 12.4          
623 12.3          
624 12.36          
625 13.07          
626 12.55          
627 12.95          
628 12.61          
629 12.78          
630 13.35          
631 12.75          
632 12.71          
633 13.19          
634 12.67          
635 12.85          
636 12.39          
637 12.37          
638 12          
639 12.84          
640 13.06          
641 12.33          
642 13.09          
643 12.84          
644 12.35          
645 12.6          
646 12.25          
647 13.17          
648 12.48          
649 12.81          
650 12.23          
651 12.5          
652 12.58          
653 12.61          
654 12.59          
655 13.17          
656 12.82          
657 13.01          
658 12.69          
659 13.18          
660 13.42          
661 12.8          
662 12.33          
663 12.62          
664 12.94          
665 12.8          
666 12.36          
667 12.26          
668 12.91          
669 12.99          
670 13.14          
671 12.81          
672 12.04          
673 12.7          
674 12.81          
675 13.33          
676 12.28          
677 12.93          
678 12.93          
679 12.8          
680 12.25          
681 12.24          
682 12.71          
683 12.18          
684 12.27          
685 12.05          
686 12.68          
687 12.63          
688 12.53          
689 12.96          
690 12.57          
691 13.22          
692 12.34          
693 12.62          
694 12.74          
695 12.57          
696 12.26          
697 12.52          
698 12.35          
699 12.35          
700 12.33          
701 11.96          
702 12.61          
703 12.36          
704 12.31          
705 12.61          
706 12.79          
707 12.85          
708 12.39          
709 12.72          
710 12.73          
711 11.84          
712 13.01          
713 12.35          
714 12.72          
715 12.86          
716 12.64          
717 12.49          
718 12.58          
719 11.96          
720 12.4          
721 12.8          
722 12.49          
723 13.19          
724 12.39          
725 12.68          
726 12.25          
727 13.13          
728 12.76          
729 12.44          
730 12.37          
731 12.16          
732 12.51          
733 12.88          
734 12.71          
735 12.29          
736 12.88          
737 12.02          
738 12.52          
739 12.76          
740 12.37          
741 13.24          
742 12.74          
743 12.17          
744 12.78          
745 13.12          
746 13          
747 13.02          
748 12.37          
749 12.46          
750 12.6          
751 12.72          
752 12.37          
753 13.21          
754 12.38          
755 12.99          
756 12.72          
757 13.02          
758 12.53          
759 12.73          
760 12.47          
761 12.56          
762 12.68          
763 12.8          
764 12.78          
765 12.17          
766 12.54          
767 12.74          
768 12.23          
769 12.28          
770 12.52          
771 12.89          
772 12.41          
773 12.64          
774 12.31          
775 12.64          
776 12.5          
777 12.45          
778 12.56          
779 12.57          
780 12.4          
781 12.79          
782 13          
783 12.57          
784 12.44          
785 12.46          
786 12.73          
787 12.39          
788 12.92          
789 12.26          
790 12.38          
791 12.51          
792 12.42          
793 12.52          
794 12.2          
795 12.56          
796 12.54          
797 12.47          
798 12.54          
799 12.77          
800 12.7          
801 12.96          
802 11.98          
803 12.4          
804 12.25          
805 12.6          
806 12.5          
807 12.71          
808 12.89          
809 12.21          
810 12.99          
811 12.79          
812 12.4          
813 12.61          
814 12.73          
815 12.22          
816 12.66          
817 12.59          
818 12.62          
819 12.71          
820 12.6          
821 12.24          
822 13.1          
823 12.55          
824 12.92          
825 12.66          
826 12.81          
827 12.88          
828 12.34          
829 12.75          
830 12.36          
831 12.7          
832 12.9          
833 12.75          
834 12.53          
835 12.61          
836 12.64          
837 12.51          
838 12.45          
839 13.17          
840 12.39          
841 12.68          
842 12.79          
843 12.81          
844 12.32          
845 12.06          
846 12.27          
847 12.52          
848 12.66          
849 12.68          
850 13.01          
851 12.27          
852 12.06          
853 12.69          
854 12.68          
855 12.89          
856 13.06          
857 12.88          
858 12.45          
859 12.53          
860 13.03          
861 12.33          
862 12.61          
863 12.79          
864 12.99          
865 12.92          
866 11.98          
867 12.24          
868 12.33          
869 13.08          
870 12.6          
871 13.39          
872 12.73          
873 12.98          
874 13.42          
875 13.03          
876 12.71          
877 12.38          
878 12.45          
879 12.34          
880 12.19          
881 12.7          
882 12.51          
883 12.98          
884 13.07          
885 13.1          
886 12.82          
887 12.84          
888 13.08          
889 12.81          
890 13.11          
891 12.83          
892 12.62          
893 12.91          
894 13          
895 12.76          
896 12.72          
897 12.39          
898 13.17          
899 12.67          
900 12.05          
901 12.7          
902 13.87          
903 13.79          
904 14.15          
905 13.87          
906 13.86          
907 13.58          
908 13.55          
909 13.66          
910 13.99          
911 12.95          
912 13.36          
913 13.87          
914 13.86          
915 13.98          
916 14.05          
917 13.4          
918 13.35          
919 13.48          
920 14.02          
921 14.31          
922 13.59          
923 14.12          
924 13.92          
925 13.89          
926 13.66          
927 13.47          
928 13.89          
929 14.26          
930 13.69          
931 13.85          
932 13.4          
933 13.31          
934 13.64          
935 13.75          
936 13.81          
937 13.94          
938 13.7          
939 13.82          
940 13.73          
941 13.25          
942 13.44          
943 13.49          
944 13.83          
945 13.95          
946 13.95          
947 13.65          
948 13.92          
949 13.68          
950 14.2          
951 13.62          
952 13.27          
953 13.07          
954 13.64          
955 13.82          
956 14.24          
957 13.47          
958 13.45          
959 14.17          
960 13.87          
961 13.44          
962 13.62          
963 13.28          
964 14.03          
965 13.72          
966 13.87          
967 13.67          
968 14.02          
969 13.9          
970 13.86          
971 14.52          
972 14.35          
973 13.49          
974 14.09          
975 14.03          
976 14          
977 14.72          
978 13.79          
979 14.29          
980 13.42          
981 13.36          
982 13.39          
983 13.61          
984 13.68          
985 13.64          
986 13.26          
987 13.72          
988 13.85          
989 13.55          
990 13.66          
991 13.75          
992 14.36          
993 13.79          
994 13.73          
995 13.98          
996 13.68          
997 13.77          
998 13.14          
999 14.09          
1000 13.32          
1001 13.59          
1002 13.82          
1003 13.21          
1004 14.04          
1005 13.74          
1006 14.21          
1007 14.13          
1008 13.97          
1009 13.59          
1010 13.87          
1011 14.05          
1012 14.38          
1013 14.72          
1014 14.1          
1015 13.77          
1016 13.78          
1017 14.04          
1018 13.91          
1019 13.16          
1020 13.71          
1021 13.27          
1022 13.76          
1023 13.8          
1024 14.1          
1025 13.33          
1026 14.22          
1027 13.37          
1028 13.89          
1029 13.11          
1030 13.95          
1031 14.15          
1032 13.57          
1033 13.61          
1034 14.05          
1035 13.63          
1036 13.78          
1037 13.84          
1038 13.46          
1039 14.01          
1040 13.62          
1041 14.03          
1042 13.68          
1043 13.58          
1044 13.67          
1045 13.89          
1046 12.97          
1047 13.84          
1048 13.97          
1049 13.9          
1050 13.54          
1051 14.25          
1052 14.07          
1053 14.41          
1054 14.54          
1055 13.96          
1056 13.55          
1057 14.5          
1058 14.25          
1059 13.39          
1060 14.25          
1061 13.78          
1062 13.82          
1063 13.65          
1064 14.13          
1065 14.25          
1066 14.12          
1067 14.26          
1068 13.47          
1069 14.07          
1070 13.51          
1071 13.65          
1072 13.92          
1073 13.11          
1074 13.64          
1075 13.33          
1076 13.59          
1077 14.4          
1078 13.25          
1079 13.25          
1080 13.5          
1081 14.13          
1082 13.39          
1083 13.89          
1084 14.05          
1085 13.79          
1086 13.96          
1087 13.76          
1088 13.33          
1089 13.93          
1090 13.56          
1091 13.58          
1092 14.01          
1093 14.2          
1094 13.92          
1095 14.04          
1096 14.05          
1097 14.54          
1098 13.79          
1099 13.76          
1100 14.06          
1101 13.57          
1102 14.04          
1103 14          
1104 14.21          
1105 13.9          
1106 13.96          
1107 13.9          
1108 13.65          
1109 13.2          
1110 13.63          
1111 13.92          
1112 13.31          
1113 13.71          
1114 14.12          
1115 14.24          
1116 14.14          
1117 13.49          
1118 14.5          
1119 13.75          
1120 14.16          
1121 13.98          
1122 13.9          
1123 13.62          
1124 13.82          
1125 13.38          
1126 13.72          
1127 14.02          
1128 13.14          
1129 13.24          
1130 13.16          
1131 13.49          
1132 13.91          
1133 14.2          
1134 13.51          
1135 14.16          
1136 13.63          
1137 13.66          
1138 14.1          
1139 14.26          
1140 13.88          
1141 13.8          
1142 13.32          
1143 13.88          
1144 14.22          
1145 13.93          
1146 13.73          
1147 13.45          
1148 14          
1149 14.03          
1150 14.05          
1151 14.29          
1152 13.8          
1153 13.57          
1154 13.46          
1155 13.9          
1156 13.78          
1157 13.92          
1158 13.69          
1159 13.99          
1160 13.39          
1161 13.84          
1162 13.5          
1163 13.21          
1164 13.87          
1165 13.74          
1166 13.86          
1167 13.55          
1168 13.77          
1169 13.74          
1170 13.65          
1171 13.42          
1172 14.27          
1173 13.66          
1174 13.62          
1175 13.74          
1176 14.11          
1177 13.98          
1178 12.92          
1179 13.91          
1180 13.64          
1181 13.93          
1182 13.56          
1183 13.55          
1184 14.05          
1185 13.77          
1186 14.11          
1187 13.88          
1188 14.41          
1189 14.26          
1190 14.22          
1191 13.74          
1192 13.69          
1193 13.17          
1194 13.76          
1195 13.83          
1196 14.15          
1197 13.84          
1198 13.18          
1199 13.77          
1200 13.84          
1201 13.45          
1202 14.87          
1203 14.69          
1204 14.9          
1205 14.87          
1206 14.68          
1207 15.49          
1208 14.89          
1209 15.07          
1210 15.2          
1211 15.87          
1212 14.98          
1213 14.93          
1214 15          
1215 15.03          
1216 15.13          
1217 15.14          
1218 15.75          
1219 15.14          
1220 15.09          
1221 15.76          
1222 15.58          
1223 15.42          
1224 15.51          
1225 15.49          
1226 14.87          
1227 15.6          
1228 14.76          
1229 15.7          
1230 15.07          
1231 15.94          
1232 15.74          
1233 15.09          
1234 15.59          
1235 15.27          
1236 14.98          
1237 15.49          
1238 15.12          
1239 15.01          
1240 14.97          
1241 15.35          
1242 14.85          
1243 15.02          
1244 14          
1245 15.63          
1246 15.07          
1247 15.66          
1248 15.07          
1249 15.27          
1250 14.65          
1251 14.83          
1252 15.17          
1253 15.18          
1254 15.66          
1255 15.17          
1256 15.08          
1257 15.28          
1258 15.76          
1259 15.24          
1260 15.34          
1261 15.15          
1262 15.19          
1263 15.19          
1264 15.14          
1265 15.66          
1266 14.77          
1267 15.13          
1268 15.33          
1269 15.32          
1270 14.87          
1271 15.13          
1272 15.09          
1273 14.94          
1274 14.45          
1275 14.95          
1276 14.81          
1277 15.73          
1278 14.85          
1279 15.91          
1280 15.54          
1281 14.98          
1282 14.84          
1283 14.87          
1284 14.81          
1285 15.49          
1286 14.98          
1287 15.55          
1288 15.43          
1289 14.96          
1290 15.42          
1291 15.1          
1292 15.02          
1293 16.03          
1294 15.05          
1295 14.88          
1296 15.28          
1297 15.24          
1298 15.05          
1299 14.99          
1300 15.32          
1301 14.83          
1302 14.68          
1303 14.92          
1304 15.72          
1305 14.81          
1306 15.48          
1307 14.78          
1308 15.44          
1309 15.39          
1310 15.17          
1311 15.65          
1312 15.42          
1313 15.17          
1314 14.84          
1315 15.06          
1316 14.56          
1317 15.39          
1318 15.17          
1319 15.42          
1320 15.34          
1321 15.63          
1322 15.17          
1323 14.83          
1324 15.26          
1325 15.18          
1326 15.53          
1327 14.92          
1328 15.65          
1329 14.67          
1330 15.08          
1331 15.22          
1332 14.7          
1333 14.82          
1334 15.65          
1335 15.39          
1336 14.86          
1337 15.25          
1338 14.77          
1339 14.98          
1340 14.89          
1341 16.18          
1342 15.11          
1343 14.4          
1344 15.57          
1345 15.49          
1346 14.75          
1347 15.24          
1348 15.25          
1349 14.81          
1350 15.7          
1351 15.45          
1352 15.2          
1353 14.65          
1354 15.67          
1355 15.05          
1356 14.88          
1357 15.12          
1358 15.3          
1359 15.21          
1360 14.58          
1361 14.41          
1362 14.82          
1363 15.1          
1364 15.2          
1365 15.48          
1366 15.82          
1367 14.96          
1368 15.24          
1369 15.73          
1370 15.49          
1371 15.06          
1372 15.21          
1373 15.65          
1374 14.99          
1375 15.42          
1376 15.1          
1377 15.49          
1378 14.89          
1379 15.16          
1380 14.87          
1381 14.76          
1382 14.91          
1383 15.39          
1384 15.25          
1385 15.06          
1386 15.21          
1387 15.59          
1388 15.45          
1389 15.42          
1390 14.95          
1391 14.99          
1392 15.1          
1393 15.39          
1394 15.74          
1395 15.8          
1396 15.5          
1397 15.24          
1398 15.52          
1399 15.17          
1400 14.98          
1401 15.42          
1402 14.97          
1403 14.33          
1404 14.94          
1405 15.01          
1406 15.55          
1407 15.86          
1408 15.96          
1409 15.32          
1410 15.21          
1411 15.2          
1412 14.79          
1413 16.11          
1414 15.3          
1415 14.92          
1416 14.81          
1417 15.02          
1418 14.96          
1419 15.11          
1420 15.24          
1421 15.56          
1422 15.14          
1423 15.02          
1424 15.08          
1425 15.23          
1426 15.43          
1427 14.86          
1428 15.02          
1429 15.1          
1430 15.27          
1431 14.89          
1432 14.85          
1433 15.06          
1434 15.09          
1435 15.64          
1436 15.39          
1437 15.04          
1438 15.77          
1439 15.3          
1440 15.53          
1441 15.48          
1442 15.17          
1443 15.71          
1444 15.33          
1445 15.09          
1446 14.72          
1447 14.46          
1448 14.94          
1449 15.25          
1450 15.69          
1451 15.45          
1452 15.14          
1453 15.08          
1454 15.01          
1455 15.34          
1456 15.16          
1457 15.84          
1458 16.02          
1459 15.1          
1460 15.4          
1461 15.13          
1462 14.53          
1463 14.47          
1464 14.5          
1465 15.24          
1466 14.87          
1467 15.56          
1468 15.19          
1469 14.77          
1470 15.41          
1471 15.1          
1472 15.14          
1473 15.01          
1474 14.46          
1475 14.78          
1476 14.98          
1477 15.02          
1478 15.32          
1479 15.5          
1480 14.8          
1481 15.3          
1482 15.25          
1483 15.21          
1484 14.32          
1485 15.31          
1486 15.32          
1487 15.16          
1488 14.77          
1489 15.57          
1490 14.97          
1491 14.8          
1492 15.18          
1493 15.41          
1494 15.31          
1495 15.5          
1496 15.09          
1497 15.2          
1498 14.91          
1499 15.13          
1500 15.03          
1501 15.69          
1502 16.75          
1503 16.41          
1504 16.56          
1505 16.3          
1506 16.23          
1507 16.81          
1508 16.22          
1509 16.16          
1510 16.57          
1511 15.97          
1512 16.95          
1513 16.64          
1514 17.03          
1515 16.48          
1516 16.43          
1517 17.06          
1518 16.06          
1519 15.95          
1520 16.46          
1521 17.05          
1522 16.65          
1523 16.44          
1524 16.57          
1525 16.86          
1526 16.2          
1527 16.83          
1528 16.3          
1529 16.21          
1530 16.83          
1531 16.23          
1532 16.05          
1533 16.34          
1534 16.63          
1535 16.12          
1536 16.63          
1537 16.45          
1538 16.65          
1539 16.56          
1540 16.54          
1541 16.13          
1542 16.37          
1543 16.53          
1544 16.46          
1545 16.63          
1546 16.26          
1547 17.1          
1548 16.93          
1549 16.74          
1550 16.54          
1551 16.38          
1552 16.54          
1553 16.41          
1554 16.72          
1555 16.91          
1556 16.89          
1557 16.48          
1558 16.76          
1559 16.12          
1560 16.31          
1561 16.53          
1562 16.19          
1563 16.86          
1564 16.7          
1565 16.39          
1566 16.2          
1567 16.18          
1568 16.43          
1569 16.25          
1570 16.57          
1571 15.94          
1572 16.39          
1573 16.1          
1574 16.38          
1575 16.31          
1576 16.38          
1577 16.68          
1578 16.37          
1579 16.3          
1580 16.1          
1581 16.87          
1582 16.38          
1583 16.61          
1584 16.69          
1585 16.38          
1586 16.65          
1587 16.3          
1588 16.12          
1589 16.26          
1590 16.63          
1591 16.65          
1592 16.64          
1593 17.11          
1594 16.49          
1595 16.39          
1596 16.38          
1597 16.39          
1598 16.61          
1599 16.35          
1600 16.85          
1601 16.24          
1602 16.08          
1603 16.55          
1604 16.65          
1605 16.12          
1606 16.86          
1607 16.64          
1608 16.1          
1609 16.12          
1610 16.82          
1611 16.85          
1612 16.26          
1613 15.95          
1614 15.93          
1615 16.55          
1616 16.54          
1617 15.99          
1618 16.81          
1619 16.75          
1620 16.27          
1621 16.25          
1622 16.56          
1623 16.44          
1624 16.36          
1625 16.81          
1626 16.13          
1627 15.96          
1628 17.11          
1629 16.25          
1630 16.25          
1631 17.03          
1632 16.51          
1633 16.6          
1634 16.11          
1635 16.25          
1636 16.34          
1637 16.68          
1638 16.76          
1639 16.52          
1640 16.54          
1641 17.1          
1642 16.71          
1643 15.96          
1644 16.5          
1645 16.72          
1646 16.28          
1647 16.41          
1648 16.36          
1649 16.55          
1650 16.31          
1651 16.64          
1652 16.47          
1653 16.39          
1654 16.68          
1655 16.65          
1656 16.43          
1657 16.66          
1658 16.12          
1659 16.13          
1660 16.94          
1661 16.3          
1662 16.52          
1663 16.67          
1664 16.41          
1665 15.98          
1666 16.26          
1667 15.8          
1668 16.46          
1669 16.74          
1670 16.77          
1671 16.83          
1672 16.48          
1673 16.69          
1674 15.68          
1675 16.87          
1676 16.18          
1677 16.26          
1678 16.9          
1679 16.54          
1680 16.45          
1681 16.27          
1682 16.87          
1683 16.33          
1684 16.81          
1685 16.84          
1686 16.24          
1687 16.38          
1688 15.7          
1689 16.2          
1690 16.86          
1691 16.93          
1692 16.72          
1693 16.54          
1694 16.91          
1695 16.57          
1696 16.28          
1697 15.85          
1698 15.85          
1699 16.93          
1700 15.93          
1701 16.53          
1702 16.65          
1703 16.74          
1704 16.21          
1705 17.06          
1706 16.79          
1707 16.35          
1708 16.34          
1709 16.52          
1710 15.83          
1711 16.62          
1712 16.4          
1713 16.17          
1714 16.2          
1715 16.66          
1716 16.88          
1717 16.56          
1718 16.53          
1719 16.45          
1720 16.31          
1721 16.42          
1722 16.81          
1723 16.7          
1724 16.1          
1725 16.7          
1726 15.73          
1727 16.33          
1728 16.06          
1729 16.35          
1730 16.16          
1731 16.58          
1732 16.83          
1733 16.44          
1734 15.78          
1735 16.25          
1736 16.38          
1737 16.77          
1738 16.82          
1739 15.57          
1740 16.1          
1741 17.04          
1742 16.29          
1743 16.81          
1744 15.84          
1745 16.32          
1746 16.6          
1747 16.06          
1748 16.65          
1749 16.48          
1750 16.19          
1751 16.38          
1752 16.89          
1753 16.29          
1754 16.48          
1755 17.14          
1756 16.02          
1757 16.79          
1758 16.58          
1759 16.3          
1760 17.21          
1761 17.06          
1762 16.77          
1763 15.81          
1764 16.64          
1765 17.13          
1766 16.55          
1767 15.89          
1768 16          
1769 16.69          
1770 16.81          
1771 16.53          
1772 16.16          
1773 16.05          
1774 16.46          
1775 16.59          
1776 15.74          
1777 16.49          
1778 16.33          
1779 16.64          
1780 16.62          
1781 16.46          
1782 16.67          
1783 16.32          
1784 15.72          
1785 16.54          
1786 16.79          
1787 16.02          
1788 16.06          
1789 16.94          
1790 16.34          
1791 15.72          
1792 16.86          
1793 15.94          
1794 16.52          
1795 16.58          
1796 16.86          
1797 16.18          
1798 16.91          
1799 16.33          
1800 16.68          
1801 16.53          
1802 17.43          
1803 17.21          
1804 17.63          
1805 18.1          
1806 17.97          
1807 17.81          
1808 17.72          
1809 18.36          
1810 17.82          
1811 18.03          
1812 18.21          
1813 17.76          
1814 17.52          
1815 17.61          
1816 17.8          
1817 18.48          
1818 17.87          
1819 18.05          
1820 17.34          
1821 17.87          
1822 17.57          
1823 17.57          
1824 18.15          
1825 17.55          
1826 17.75          
1827 18.3          
1828 18.04          
1829 17.65          
1830 18.13          
1831 17.94          
1832 18.04          
1833 17.63          
1834 18.08          
1835 17.79          
1836 17.41          
1837 17.44          
1838 17.78          
1839 18.37          
1840 18          
1841 17.67          
1842 17.41          
1843 17.6          
1844 17.77          
1845 18.15          
1846 17.26          
1847 17.71          
1848 18.39          
1849 18.09          
1850 17.91          
1851 17.59          
1852 17.55          
1853 18.43          
1854 18.23          
1855 17.39          
1856 18.04          
1857 17.27          
1858 17.64          
1859 17.59          
1860 18.15          
1861 18.55          
1862 17.41          
1863 17.51          
1864 17.87          
1865 18.24          
1866 18.36          
1867 18.48          
1868 18.09          
1869 18.01          
1870 17.63          
1871 17.61          
1872 18.23          
1873 18.09          
1874 17.64          
1875 18.26          
1876 17.51          
1877 17.45          
1878 17.17          
1879 17.15          
1880 17.26          
1881 17.13          
1882 17.98          
1883 18.17          
1884 18.06          
1885 17.77          
1886 18.04          
1887 16.86          
1888 17.73          
1889 17.49          
1890 17.36          
1891 18.18          
1892 17.9          
1893 18.03          
1894 18.28          
1895 17.75          
1896 18.22          
1897 17.9          
1898 18.3          
1899 17.68          
1900 18.03          
1901 17.84          
1902 18.4          
1903 17.78          
1904 17.86          
1905 18.08          
1906 16.91          
1907 17.97          
1908 17.42          
1909 17.43          
1910 18.07          
1911 17.47          
1912 17.82          
1913 17.92          
1914 18.23          
1915 17.67          
1916 18.21          
1917 17.29          
1918 17.42          
1919 17.46          
1920 17.87          
1921 17.48          
1922 17.55          
1923 17.5          
1924 17.71          
1925 17.83          
1926 17.18          
1927 17.37          
1928 17.3          
1929 18.11          
1930 17.64          
1931 18.29          
1932 17.66          
1933 18.05          
1934 18.19          
1935 17.5          
1936 17.9          
1937 18.38          
1938 17.92          
1939 17.14          
1940 17.73          
1941 17.87          
1942 17.53          
1943 18.04          
1944 17.22          
1945 17.79          
1946 17.73          
1947 17.44          
1948 17.37          
1949 17.93          
1950 17.49          
1951 17.75          
1952 17.32          
1953 18          
1954 17.83          
1955 17.27          
1956 17.48          
1957 17.93          
1958 17.6          
1959 18.3          
1960 17.41          
1961 16.98          
1962 18.13          
1963 17.41          
1964 17.53          
1965 18.19          
1966 17.08          
1967 17.53          
1968 17.32          
1969 17.82          
1970 17.87          
1971 17.9          
1972 17.79          
1973 17.53          
1974 17.92          
1975 17.39          
1976 17.74          
1977 18.16          
1978 17.51          
1979 17.16          
1980 17.42          
1981 16.98          
1982 17.55          
1983 17.6          
1984 17.71          
1985 17.49          
1986 17.72          
1987 17.87          
1988 17.83          
1989 17.61          
1990 17.82          
1991 17.28          
1992 17.69          
1993 17.13          
1994 17.69          
1995 17.58          
1996 17.5          
1997 17.49          
1998 18.41          
1999 17.67          
2000 17.76          
2001 18.09          
2002 18.1          
2003 17.43          
2004 18.32          
2005 17.98          
2006 17.8          
2007 17.8          
2008 17.92          
2009 17.25          
2010 18.27          
2011 18.08          
2012 17.77          
2013 18.17          
2014 17.67          
2015 17.25          
2016 17.56          
2017 17.55          
2018 17.98          
2019 18.02          
2020 17.45          
2021 17.46          
2022 17.35          
2023 17.61          
2024 17.82          
2025 17.75          
2026 17.68          
2027 18.21          
2028 17.94          
2029 17.61          
2030 17.29          
2031 17.43          
2032 18.17          
2033 17.65          
2034 17.45          
2035 17.32          
2036 17.64          
2037 17.83          
2038 18.57          
2039 17.38          
2040 18          
2041 17.88          
2042 17.59          
2043 18.19          
2044 17.49          
2045 17.96          
2046 17.56          
2047 17.75          
2048 17.28          
2049 17.65          
2050 17.77          
2051 17.85          
2052 17.79          
2053 17.9          
2054 16.92          
2055 17.79          
2056 17.45          
2057 17.67          
2058 17.66          
2059 18.52          
2060 17.89          
2061 17.76          
2062 18.2          
2063 17.96          
2064 18.04          
2065 18          
2066 17.35          
2067 17.79          
2068 17.22          
2069 17.46          
2070 17.4          
2071 17.9          
2072 17.97          
2073 17.99          
2074 17.72          
2075 17.4          
2076 17.76          
2077 17.42          
2078 16.92          
2079 18.18          
2080 18.29          
2081 17.82          
2082 17.96          
2083 17.28          
2084 17.57          
2085 17.46          
2086 17.39          
2087 18.06          
2088 17.55          
2089 17.17          
2090 18.06          
2091 17.9          
2092 17.66          
2093 17.46          
2094 17.66          
2095 17.5          
2096 17.86          
2097 17.72          
2098 17.96          
2099 17.61          
2100 17.58          
2101 17.72          
2102 19.11          
2103 18.99          
2104 19.24          
2105 19.35          
2106 19.23          
2107 19.56          
2108 19.08          
2109 19.53          
2110 19.25          
2111 19.23          
2112 19.26          
2113 19.53          
2114 19.24          
2115 19.38          
2116 19.47          
2117 18.99          
2118 19.27          
2119 19.09          
2120 18.99          
2121 19.04          
2122 19.54          
2123 18.54          
2124 19.28          
2125 18.8          
2126 18.82          
2127 18.99          
2128 18.51          
2129 18.98          
2130 19.47          
2131 19.02          
2132 18.63          
2133 19.63          
2134 19.66          
2135 19          
2136 19.24          
2137 19.2          
2138 19.24          
2139 18.99          
2140 18.98          
2141 18.96          
2142 19.33          
2143 19.57          
2144 19.4          
2145 18.89          
2146 19.6          
2147 19.73          
2148 19.25          
2149 18.92          
2150 19.08          
2151 18.92          
2152 18.93          
2153 19.32          
2154 19.14          
2155 19.1          
2156 19.14          
2157 18.89          
2158 19.12          
2159 19.1          
2160 19.51          
2161 18.58          
2162 19.27          
2163 19.62          
2164 19.31          
2165 19.01          
2166 19.49          
2167 19          
2168 18.45          
2169 18.71          
2170 19.71          
2171 19.31          
2172 19.04          
2173 19.75          
2174 19.32          
2175 18.84          
2176 18.51          
2177 19.04          
2178 19.95          
2179 18.91          
2180 18.62          
2181 18.98          
2182 18.97          
2183 19.64          
2184 18.92          
2185 19.18          
2186 18.54          
2187 19.37          
2188 18.55          
2189 18.71          
2190 19.3          
2191 19.56          
2192 19.18          
2193 19.78          
2194 19.21          
2195 19.22          
2196 18.79          
2197 19.28          
2198 19.47          
2199 19.33          
2200 19.32          
2201 18.74          
2202 18.9          
2203 19.62          
2204 18.77          
2205 19.03          
2206 19.28          
2207 18.8          
2208 18.9          
2209 19.29          
2210 18.7          
2211 18.77          
2212 19.7          
2213 19.45          
2214 19.24          
2215 19.02          
2216 19.05          
2217 20.23          
2218 19.71          
2219 18.83          
2220 19.53          
2221 19.54          
2222 19.11          
2223 18.78          
2224 18.84          
2225 19.07          
2226 19.03          
2227 18.27          
2228 19.13          
2229 19.57          
2230 19.13          
2231 18.94          
2232 19.17          
2233 19.39          
2234 19.63          
2235 19.32          
2236 19.25          
2237 19.08          
2238 19.11          
2239 18.75          
2240 19.33          
2241 18.98          
2242 19.07          
2243 18.49          
2244 19.32          
2245 18.7          
2246 18.86          
2247 18.72          
2248 19.3          
2249 19.55          
2250 19.37          
2251 19.42          
2252 19.71          
2253 19.2          
2254 18.92          
2255 19.15          
2256 19.73          
2257 18.92          
2258 19.33          
2259 19.36          
2260 18.75          
2261 19.41          
2262 19.3          
2263 19.26          
2264 19.16          
2265 18.85          
2266 19.03          
2267 18.72          
2268 19.35          
2269 19.16          
2270 19.07          
2271 19.08          
2272 19.65          
2273 19.25          
2274 19.03          
2275 19.06          
2276 19.78          
2277 18.97          
2278 19.29          
2279 19.6          
2280 19.2          
2281 19.2          
2282 19.63          
2283 19.03          
2284 18.42          
2285 19.04          
2286 18.87          
2287 20.19          
2288 19.83          
2289 19.44          
2290 19.32          
2291 19.36          
2292 19.47          
2293 18.94          
2294 19.16          
2295 19.53          
2296 19.55          
2297 19.58          
2298 19.59          
2299 19.27          
2300 18.9          
2301 18.64          
2302 18.67          
2303 18.52          
2304 18.99          
2305 18.2          
2306 18.2          
2307 18.94          
2308 18.94          
2309 18.89          
2310 18.84          
2311 19.12          
2312 19.51          
2313 19.47          
2314 19.02          
2315 19          
2316 19.74          
2317 19.48          
2318 19.21          
2319 19.26          
2320 18.72          
2321 18.95          
2322 19.68          
2323 18.87          
2324 19.18          
2325 19.69          
2326 19.28          
2327 18.56          
2328 18.67          
2329 19.4          
2330 18.75          
2331 19.28          
2332 19.64          
2333 19.25          
2334 19.07          
2335 19.06          
2336 19.75          
2337 18.96          
2338 18.7          
2339 19.75          
2340 19.28          
2341 19.83          
2342 19.84          
2343 18.96          
2344 19.3          
2345 19.42          
2346 18.92          
2347 19.28          
2348 18.98          
2349 19.01          
2350 18.71          
2351 19.45          
2352 19.19          
2353 18.94          
2354 19.35          
2355 18.47          
2356 19.77          
2357 19.75          
2358 19.44          
2359 19.07          
2360 19.04          
2361 19.41          
2362 19.32          
2363 19.16          
2364 19.13          
2365 19.54          
2366 18.85          
2367 18.56          
2368 18.75          
2369 18.68          
2370 18.95          
2371 18.79          
2372 19.04          
2373 18.48          
2374 18.94          
2375 18.82          
2376 19.1          
2377 19.4          
2378 18.94          
2379 19.2          
2380 18.66          
2381 18.37          
2382 19.33          
2383 18.25          
2384 19.27          
2385 18.71          
2386 19.06          
2387 18.94          
2388 18.78          
2389 19.18          
2390 19.29          
2391 19.08          
2392 18.57          
2393 19.62          
2394 19.41          
2395 19.16          
2396 19.58          
2397 19.33          
2398 19.51          
2399 19.24          
2400 19.55          
2401 19.42          
2402 19.85          
2403 20.16          
2404 20.17          
2405 19.37          
2406 19.35          
2407 19.65          
2408 19.6          
2409 19.62          
2410 19.29          
2411 19.59          
2412 19.51          
2413 20.19          
2414 20.05          
2415 19.98          
2416 20.23          
2417 20.11          
2418 20.05          
2419 20.69          
2420 20.42          
2421 19.95          
2422 19.78          
2423 20.09          
2424 19.98          
2425 19.52          
2426 19.72          
2427 20.03          
2428 19.44          
2429 20.23          
2430 19.46          
2431 19.53          
2432 19.86          
2433 19.96          
2434 19.93          
2435 19.5          
2436 20.2          
2437 19.92          
2438 20.02          
2439 19.63          
2440 19.64          
2441 19.62          
2442 19.7          
2443 20.16          
2444 19.67          
2445 19.94          
2446 19.2          
2447 19.3          
2448 19.9          
2449 20.01          
2450 19.58          
2451 19.19          
2452 19.92          
2453 20.12          
2454 20.2          
2455 19.63          
2456 19.58          
2457 19.64          
2458 19.42          
2459 19.92          
2460 19.4          
2461 19.61          
2462 19.96          
2463 19.65          
2464 19.39          
2465 19.88          
2466 20.3          
2467 20.28          
2468 19.77          
2469 20.19          
2470 20.09          
2471 19.76          
2472 19.33          
2473 19.68          
2474 20.45          
2475 20.53          
2476 19.79          
2477 20.2          
2478 19.73          
2479 20.18          
2480 19.99          
2481 20.29          
2482 19.69          
2483 19.86          
2484 19.87          
2485 19.88          
2486 19.31          
2487 20.15          
2488 20.07          
2489 19.56          
2490 20.22          
2491 20.16          
2492 19.31          
2493 19.71          
2494 20.2          
2495 20.44          
2496 20.2          
2497 20.53          
2498 20.24          
2499 20.44          
2500 19.2          
2501 20.45          
2502 19.84          
2503 19.65          
2504 20.49          
2505 20.4          
2506 20.22          
2507 20.06          
2508 19.77          
2509 20.01          
2510 19.89          
2511 20.1          
2512 19.96          
2513 19.07          
2514 19.72          
2515 20.3          
2516 19.55          
2517 19.39          
2518 20.01          
2519 20.39          
2520 19.64          
2521 19.74          
2522 19.72          
2523 19.79          
2524 19.71          
2525 20.06          
2526 20.3          
2527 19.85          
2528 19.41          
2529 20.24          
2530 19.66          
2531 19.93          
2532 19.31          
2533 19.52          
2534 20.06          
2535 20.32          
2536 19.38          
2537 19.86          
2538 20.27          
2539 20.33          
2540 20.14          
2541 19.98          
2542 20.26          
2543 19.8          
2544 19.56          
2545 19.68          
2546 20.16          
2547 19.74          
2548 19.85          
2549 20.18          
2550 19.52          
2551 20.26          
2552 19.87          
2553 19.84          
2554 20.18          
2555 19.73          
2556 20.21          
2557 20.2          
2558 19.55          
2559 19.58          
2560 19.73          
2561 19.94          
2562 20.16          
2563 19.73          
2564 19.15          
2565 20.6          
2566 20.13          
2567 19.67          
2568 19.87          
2569 19.56          
2570 19.42          
2571 20.16          
2572 19.92          
2573 19.84          
2574 20.17          
2575 19.99          
2576 20          
2577 20.18          
2578 19.44          
2579 19.76          
2580 20.31          
2581 19.94          
2582 19.96          
2583 19.7          
2584 19.42          
2585 20.26          
2586 20.03          
2587 20.4          
2588 20          
2589 20.07          
2590 20.15          
2591 20.13          
2592 19.46          
2593 18.95          
2594 19.96          
2595 20.29          
2596 19.45          
2597 19.85          
2598 19.95          
2599 19.51          
2600 19.82          
2601 19.7          
2602 20.03          
2603 19.63          
2604 19.78          
2605 20.08          
2606 19.91          
2607 20.22          
2608 20.04          
2609 20.06          
2610 20.21          
2611 19.82          
2612 19.64          
2613 19.79          
2614 19.91          
2615 20.31          
2616 19.96          
2617 20.15          
2618 19.97          
2619 19.83          
2620 19.82          
2621 20.52          
2622 19.88          
2623 20.09          
2624 19.49          
2625 20.2          
2626 20.03          
2627 19.57          
2628 19.97          
2629 19.39          
2630 19.33          
2631 19.72          
2632 19.98          
2633 19.5          
2634 19.78          
2635 19.46          
2636 20.03          
2637 19.77          
2638 19.52          
2639 20.48          
2640 19.63          
2641 20.03          
2642 20.15          
2643 19.76          
2644 19.18          
2645 19.05          
2646 20.2          
2647 19.55          
2648 19.05          
2649 19.78          
2650 20.37          
2651 19.97          
2652 19.63          
2653 19.7          
2654 19.43          
2655 19.53          
2656 19.1          
2657 19.35          
2658 20.1          
2659 20.28          
2660 20.25          
2661 20.3          
2662 20.05          
2663 19.93          
2664 20.26          
2665 20.16          
2666 19.52          
2667 20.24          
2668 19.95          
2669 19.76          
2670 19.2          
2671 19.37          
2672 19.6          
2673 20.17          
2674 19.65          
2675 20.24          
2676 20.29          
2677 20.24          
2678 20.16          
2679 20.48          
2680 20.25          
2681 19.8          
2682 19.34          
2683 20.02          
2684 19.74          
2685 20.01          
2686 20.1          
2687 20.24          
2688 19.4          
2689 19.82          
2690 20.25          
2691 19.42          
2692 20.13          
2693 19.87          
2694 20.03          
2695 20.01          
2696 19.56          
2697 19.71          
2698 20.09          
2699 19.71          
2700 19.77          
2701 19.38          
2702 20.79          
2703 20.69          
2704 20.61          
2705 20.33          
2706 20.2          
2707 20.68          
2708 20.64          
2709 20.07          
2710 20.23          
2711 20.35          
2712 20.83          
2713 20.74          
2714 20.15          
2715 20.27          
2716 20.35          
2717 20.26          
2718 20.8          
2719 20.6          
2720 21.08          
2721 20.57          
2722 20.77          
2723 20.26          
2724 20.17          
2725 20.61          
2726 20.3          
2727 20.08          
2728 20.52          
2729 20.63          
2730 20.43          
2731 20.17          
2732 20.41          
2733 20.48          
2734 20.04          
2735 19.97          
2736 20.59          
2737 20.86          
2738 21.1          
2739 20.57          
2740 20.42          
2741 20.59          
2742 21.05          
2743 20.43          
2744 20.37          
2745 20          
2746 20.51          
2747 19.78          
2748 20.86          
2749 20.55          
2750 20.85          
2751 20.78          
2752 20.02          
2753 20.06          
2754 20.89          
2755 20.17          
2756 20.12          
2757 20.64          
2758 20.69          
2759 20.9          
2760 20.68          
2761 20.42          
2762 20.42          
2763 20.59          
2764 20.64          
2765 20.67          
2766 20.17          
2767 20.37          
2768 20.89          
2769 20.56          
2770 20.5          
2771 20.16          
2772 20.63          
2773 20.47          
2774 20.59          
2775 20.35          
2776 20.55          
2777 20.38          
2778 20.22          
2779 20.93          
2780 20.27          
2781 20.06          
2782 20.57          
2783 20.74          
2784 20.66          
2785 20.06          
2786 20.31          
2787 20.28          
2788 19.77          
2789 20.76          
2790 20.61          
2791 20.69          
2792 20.59          
2793 20.93          
2794 20.73          
2795 20.2          
2796 20.86          
2797 20.54          
2798 20.11          
2799 20.86          
2800 20.41          
2801 20.33          
2802 20.07          
2803 19.92          
2804 20.37          
2805 20.75          
2806 20.52          
2807 20.34          
2808 20.71          
2809 20.75          
2810 20.2          
2811 20.55          
2812 20.56          
2813 20.75          
2814 20.9          
2815 20.08          
2816 19.85          
2817 20.87          
2818 20.36          
2819 20.79          
2820 19.95          
2821 20.09          
2822 20.44          
2823 21.09          
2824 20.74          
2825 20.29          
2826 20.23          
2827 19.86          
2828 20.31          
2829 20.94          
2830 20.22          
2831 20.29          
2832 20.38          
2833 20.56          
2834 20.6          
2835 20.96          
2836 19.68          
2837 20.02          
2838 20.47          
2839 20.59          
2840 20.79          
2841 20.64          
2842 20.51          
2843 20.47          
2844 20.74          
2845 20.63          
2846 20.75          
2847 20.7          
2848 20.22          
2849 20.62          
2850 20.72          
2851 20.39          
2852 20.24          
2853 20.57          
2854 20.64          
2855 20.64          
2856 20.06          
2857 20.18          
2858 20.81          
2859 19.98          
2860 20.29          
2861 20.2          
2862 20.53          
2863 20.26          
2864 20.91          
2865 19.98          
2866 20.54          
2867 19.87          
2868 19.47          
2869 20.86          
2870 20.75          
2871 21.09          
2872 20.04          
2873 20.38          
2874 20.49          
2875 20.24          
2876 20.81          
2877 20.44          
2878 20.73          
2879 20.56          
2880 21.01          
2881 21.2          
2882 21.03          
2883 20.32          
2884 21.02          
2885 20.53          
2886 20.32          
2887 20.75          
2888 20.42          
2889 21.24          
2890 21.16          
2891 20.88          
2892 20.96          
2893 20.71          
2894 20.98          
2895 20.35          
2896 20.81          
2897 21.18          
2898 20.1          
2899 20.34          
2900 19.6          
2901 20.81          
2902 20.82          
2903 20.57          
2904 20.79          
2905 20.24          
2906 20.04          
2907 20.32          
2908 20.64          
2909 20.65          
2910 20.72          
2911 20.33          
2912 20.8          
2913 20.28          
2914 20.61          
2915 20.17          
2916 20.21          
2917 20.01          
2918 19.93          
2919 20.1          
2920 20.47          
2921 20.63          
2922 21.27          
2923 21.16          
2924 20.71          
2925 20.64          
2926 20.51          
2927 20.71          
2928 20.55          
2929 20.44          
2930 20.14          
2931 21.01          
2932 20.59          
2933 20.09          
2934 20.19          
2935 20.1          
2936 20.61          
2937 20.57          
2938 20.32          
2939 20.28          
2940 20.78          
2941 20.71          
2942 20.38          
2943 20.68          
2944 20.21          
2945 20.65          
2946 20.26          
2947 20.82          
2948 20.7          
2949 20.59          
2950 20.62          
2951 20.51          
2952 20.47          
2953 20.8          
2954 20.22          
2955 20.5          
2956 20.33          
2957 20.45          
2958 20.91          
2959 21.05          
2960 20.76          
2961 20.38          
2962 21.12          
2963 20.73          
2964 21.11          
2965 20.62          
2966 20.69          
2967 20.71          
2968 20.74          
2969 20.42          
2970 21.18          
2971 20.59          
2972 20.75          
2973 20.73          
2974 20.33          
2975 20.73          
2976 20.29          
2977 20.8          
2978 20.34          
2979 20.67          
2980 20.31          
2981 20.35          
2982 20.13          
2983 19.94          
2984 20.53          
2985 20.35          
2986 20.36          
2987 20.87          
2988 20.52          
2989 20.5          
2990 19.99          
2991 19.78          
2992 20.43          
2993 20.2          
2994 20.23          
2995 20.4          
2996 20.19          
2997 20.27          
2998 20.58          
2999 20.94          
3000 20.13          
3001 20.45          
3002 20.74          
3003 20.64          
3004 20.28          
3005 20.83          
3006 20.56          
3007 20.48          
3008 20.54          
3009 19.97          
3010 20.33          
3011 20.71          
3012 20.01          
3013 20.91          
3014 20.21          
3015 20.51          
3016 20.46          
3017 20.68          
3018 21.08          
3019 20.87          
3020 20.95          
3021 20.57          
3022 20.23          
3023 20.43          
3024 20.4          
3025 20.53          
3026 20.26          
3027 20.09          
3028 20.79          
3029 20.28          
3030 20.84          
3031 21.03          
3032 20.54          
3033 20.15          
3034 20.89          
3035 20.77          
3036 20.76          
3037 20.55          
3038 20.74          
3039 20.9          
3040 20.75          
3041 19.41          
3042 20.37          
3043 20.55          
3044 20.41          
3045 20.57          
3046 20.05          
3047 20.41          
3048 20.58          
3049 19.62          
3050 20.2          
3051 20.62          
3052 20.37          
3053 20.77          
3054 20.44          
3055 20.65          
3056 20.55          
3057 20.56          
3058 20.47          
3059 21.1          
3060 20.46          
3061 20.27          
3062 20.12          
3063 20.77          
3064 20.24          
3065 20.62          
3066 21.1          
3067 20.38          
3068 20.7          
3069 20.47          
3070 20.51          
3071 20.38          
3072 20.32          
3073 20.67          
3074 20.72          
3075 20.61          
3076 20.4          
3077 19.86          
3078 19.78          
3079 19.71          
3080 20.78          
3081 20.7          
3082 20.82          
3083 20.48          
3084 20.32          
3085 20.68          
3086 20.16          
3087 20.34          
3088 20.72          
3089 20.58          
3090 20.35          
3091 20.79          
3092 19.93          
3093 20.22          
3094 19.89          
3095 20.65          
3096 20.38          
3097 21.02          
3098 20.92          
3099 20.64          
3100 21.08          
3101 20.65          
3102 20.24          
3103 19.99          
3104 20.31          
3105 20.59          
3106 20.81          
3107 20.68          
3108 21.08          
3109 20.83          
3110 20.49          
3111 20.43          
3112 20.87          
3113 20.33          
3114 19.82          
3115 20.74          
3116 20.52          
3117 20.68          
3118 20.35          
3119 20.37          
3120 20.04          
3121 20.38          
3122 20.85          
3123 21.04          
3124 20.93          
3125 20.8          
3126 20.24          
3127 20.15          
3128 20.44          
3129 20.39          
3130 19.84          
3131 20.36          
3132 20.61          
3133 21.11          
3134 19.96          
3135 20.47          
3136 20.68          
3137 20.54          
3138 20.66          
3139 20.5          
3140 20.6          
3141 20.29          
3142 20.55          
3143 20.73          
3144 20.24          
3145 20.62          
3146 20.92          
3147 20.79          
3148 20.87          
3149 20.36          
3150 20.94          
3151 20.4          
3152 20.37          
3153 20.38          
3154 21.09          
3155 20.29          
3156 20.65          
3157 20.25          
3158 20.32          
3159 20.5          
3160 20.63          
3161 20.68          
3162 20.4          
3163 20.04          
3164 20.45          
3165 20.42          
3166 20.83          
3167 20.99          
3168 20.75          
3169 21.28          
3170 20.47          
3171 20.14          
3172 20.38          
3173 20.14          
3174 20.45          
3175 20          
3176 19.88          
3177 20.45          
3178 20.92          
3179 20.79          
3180 20.71          
3181 20.61          
3182 20.23          
3183 20.03          
3184 20.52          
3185 20.77          
3186 20.69          
3187 20.09          
3188 20.34          
3189 20.52          
3190 20.67          
3191 20.07          
3192 20.41          
3193 20.4          
3194 20.77          
3195 20.4          
3196 20.92          
3197 21.14          
3198 20.56          
3199 20.57          
3200 19.79          
3201 20.17          
3202 20.73          
3203 20.55          
3204 20.41          
3205 20.56          
3206 20.77          
3207 20.43          
3208 20.09          
3209 19.93          
3210 20.04          
3211 20.07          
3212 20.55          
3213 20.47          
3214 20.98          
3215 20.63          
3216 20.6          
3217 20.24          
3218 21.09          
3219 20.99          
3220 20.43          
3221 20.42          
3222 20.1          
3223 21.12          
3224 20.81          
3225 20.58          
3226 21.2          
3227 20.29          
3228 20.24          
3229 20.71          
3230 20.26          
3231 20.21          
3232 20.83          
3233 20.53          
3234 20.62          
3235 20.66          
3236 20.65          
3237 20.21          
3238 20.02          
3239 21.05          
3240 20.52          
3241 20.39          
3242 20.75          
3243 20.74          
3244 20.66          
3245 20.81          
3246 20.92          
3247 20.44          
3248 20.58          
3249 20.42          
3250 20.02          
3251 20.8          
3252 20.24          
3253 20.67          
3254 20.16          
3255 20.64          
3256 19.84          
3257 20.45          
3258 20.58          
3259 20.23          
3260 20.83          
3261 20.82          
3262 20.6          
3263 20.46          
3264 20.3          
3265 20.38          
3266 20.82          
3267 20.41          
3268 20.66          
3269 20.33          
3270 20.31          
3271 20.64          
3272 20.23          
3273 19.92          
3274 20.35          
3275 20.65          
3276 20.78          
3277 20.61          
3278 20.45          
3279 20.27          
3280 20.45          
3281 21.13          
3282 20.24          
3283 20.18          
3284 20.25          
3285 20.48          
3286 20.39          
3287 20.81          
3288 20.23          
3289 20.32          
3290 20.46          
3291 20.54          
3292 20.98          
3293 20.12          
3294 20.26          
3295 20.97          
3296 20.54          
3297 20.4          
3298 20.27          
3299 20.64          
3300 20.78          
3301 20.94          
3302 20.62          
3303 20.96          
3304 20.55          
3305 19.97          
3306 20.23          
3307 20.32          
3308 20.11          
3309 20.04          
3310 20.82          
3311 20.54          
3312 20.83          
3313 20.93          
3314 20.59          
3315 20.31          
3316 20.46          
3317 20.63          
3318 20.03          
3319 21.39          
3320 20.71          
3321 20.53          
3322 20.85          
3323 21.08          
3324 20.55          
3325 20.6          
3326 20.46          
3327 20.83          
3328 20.28          
3329 19.95          
3330 20.59          
3331 21.08          
3332 19.66          
3333 20.41          
3334 19.94          
3335 20.73          
3336 20.54          
3337 20.68          
3338 20.12          
3339 20.4          
3340 20.52          
3341 20.63          
3342 20.02          
3343 20.24          
3344 20.8          
3345 21.09          
3346 20.34          
3347 20.18          
3348 20.46          
3349 20.76          
3350 20.22          
3351 20.37          
3352 20.29          
3353 20.43          
3354 19.92          
3355 19.72          
3356 20.11          
3357 20.2          
3358 20.65          
3359 20.42          
3360 19.93          
3361 20.35          
3362 20.94          
3363 20.59          
3364 20.78          
3365 20.34          
3366 20.54          
3367 21.01          
3368 20.76          
3369 20.14          
3370 20.78          
3371 21.29          
3372 20.64          
3373 20.75          
3374 20.96          
3375 20.06          
3376 19.84          
3377 20.21          
3378 20.04          
3379 20.54          
3380 20.97          
3381 21.09          
3382 21.12          
3383 20.8          
3384 20.2          
3385 20.53          
3386 21.08          
3387 20.82          
3388 20.91          
3389 21.3          
3390 19.88          
3391 20.34          
3392 20.46          
3393 20.6          
3394 20.38          
3395 20.69          
3396 20.12          
3397 20.55          
3398 20.1          
3399 20.59          
3400 20.84          
3401 20.5          
3402 19.87          
3403 20.36          
3404 20.84          
3405 20.47          
3406 20.31          
3407 20.46          
3408 20.75          
3409 19.75          
3410 20.39          
3411 20.49          
3412 20.42          
3413 20.62          
3414 20.83          
3415 19.67          
3416 20.26          
3417 20.13          
3418 20.26          
3419 20.79          
3420 21.09          
3421 20.35          
3422 20.09          
3423 20.58          
3424 20.22          
3425 20.43          
3426 20.59          
3427 20.67          
3428 20.45          
3429 20.82          
3430 21.15          
3431 19.96          
3432 20.61          
3433 20.1          
3434 20.09          
3435 20.43          
3436 20.23          
3437 20.33          
3438 21.02          
3439 21.06          
3440 20.38          
3441 20.38          
3442 19.87          
3443 20.15          
3444 20.61          
3445 20.77          
3446 21.32          
3447 20.08          
3448 20.66          
3449 20.37          
3450 20.81          
3451 20.75          
3452 20.22          
3453 21.02          
3454 20.51          
3455 21.06          
3456 21.03          
3457 20.83          
3458 20.8          
3459 20.43          
3460 20.37          
3461 20.11          
3462 20.34          
3463 20.1          
3464 20.78          
3465 20.19          
3466 20.09          
3467 19.79          
3468 20.33          
3469 20.5          
3470 20.56          
3471 20.86          
3472 20.26          
3473 20.43          
3474 20.12          
3475 20.9          
3476 20.61          
3477 20.49          
3478 20.84          
3479 20.14          
3480 20.37          
3481 20.11          
3482 19.57          
3483 20.33          
3484 21.08          
3485 20.78          
3486 20.57          
3487 20.76          
3488 21.21          
3489 20.92          
3490 20.34          
3491 20.91          
3492 20.27          
3493 20.46          
3494 20.2          
3495 20.68          
3496 20.3          
3497 20.35          
3498 20.14          
3499 20.48          
3500 20.02          
3501 20.36          
3502 20.77          
3503 20.6          
3504 19.93          
3505 20.73          
3506 20.07          
3507 20.44          
3508 19.89          
3509 20.24          
3510 20.69          
3511 20.22          
3512 19.87          
3513 20.61          
3514 20.39          
3515 20.85          
3516 20.28          
3517 20.39          
3518 20.03          
3519 20.74          
3520 20.86          
3521 21.04          
3522 20.78          
3523 20.65          
3524 20.18          
3525 20.85          
3526 21.3          
3527 20.96          
3528 20.81          
3529 20.6          
3530 20.74          
3531 20.5          
3532 21.2          
3533 21.14          
3534 20.45          
3535 20.35          
3536 20.47          
3537 20.31          
3538 20.15          
3539 20.59          
3540 20.34          
3541 20.56          
3542 20.51          
3543 20.26          
3544 20.96          
3545 20.99          
3546 20.3          
3547 20.16          
3548 20.07          
3549 20.22          
3550 20.51          
3551 20.04          
3552 20.57          
3553 20.48          
3554 20.45          
3555 20.2          
3556 20.58          
3557 20.12          
3558 20.49          
3559 20.37          
3560 20.53          
3561 20.9          
3562 20.52          
3563 20.55          
3564 20.17          
3565 20.49          
3566 21.08          
3567 21.1          
3568 20.42          
3569 20.7          
3570 20.2          
3571 20.9          
3572 20.38          
3573 20.22          
3574 20.13          
3575 21.08          
3576 20.3          
3577 20.82          
3578 20.13          
3579 20.68          
3580 20          
3581 20.95          
3582 19.89          
3583 20.15          
3584 20.03          
3585 20.43          
3586 20.84          
3587 20.88          
3588 20.44          
3589 20.61          
3590 21.02          
3591 20.3          
3592 20.3          
3593 20.83          
3594 20.69          
3595 20.57          
3596 20.53          
3597 20.33          
3598 20          
3599 20.49          
3600 20.74          
3601 20.23          
3602 21          
3603 20.32          
3604 20.82          
3605 21.39          
3606 20.18          
3607 20.19          
3608 20.63          
3609 20.43          
3610 20.11          
3611 20.58          
3612 21.19          
3613 20.75          
3614 20.69          
3615 20.81          
3616 21.12          
3617 21.39          
3618 20.9          
3619 21.01          
3620 20.53          
3621 20.5          
3622 20.4          
3623 20.82          
3624 20.79          
3625 20.58          
3626 20.44          
3627 20.64          
3628 21.02          
3629 20.59          
3630 20.59          
3631 20.99          
3632 20.39          
3633 20.46          
3634 20.38          
3635 20.48          
3636 20.23          
3637 20.54          
3638 20.16          
3639 20.52          
3640 20.65          
3641 20.51          
3642 20.59          
3643 20.59          
3644 20.14          
3645 20.78          
3646 20.5          
3647 20.95          
3648 20.64          
3649 21.2          
3650 20.78          
3651 20.49          
3652 20.14          
3653 20.6          
3654 20.48          
3655 20.37          
3656 20.57          
3657 20.42          
3658 20.95          
3659 20.13          
3660 21.11          
3661 20.28          
3662 20.73          
3663 20.11          
3664 20.17          
3665 20.03          
3666 20.03          
3667 20.84          
3668 20.92          
3669 20.83          
3670 20.14          
3671 21.19          
3672 20.48          
3673 21.55          
3674 20.71          
3675 20.19          
3676 19.84          
3677 20.33          
3678 19.94          
3679 20.41          
3680 20.2          
3681 19.97          
3682 20.88          
3683 20.7          
3684 20.04          
3685 20.52          
3686 20.29          
3687 20.08          
3688 20.65          
3689 20.38          
3690 19.97          
3691 20.02          
3692 20.49          
3693 20.71          
3694 20.18          
3695 20.29          
3696 19.94          
3697 20.51          
3698 20.42          
3699 20.48          
3700 20.22          
3701 20.77          
3702 20.83          
3703 20.18          
3704 20.18          
3705 20.25          
3706 20.67          
3707 20.9          
3708 20.79          
3709 20.41          
3710 19.86          
3711 20.92          
3712 20.35          
3713 20.37          
3714 20.27          
3715 20.41          
3716 20.45          
3717 20.92          
3718 20.41          
3719 20.99          
3720 20.1          
3721 20.94          
3722 20.79          
3723 20.42          
3724 20.9          
3725 20.36          
3726 20.6          
3727 20.55          
3728 20.92          
3729 20.64          
3730 20.8          
3731 20.86          
3732 20.78          
3733 20.29          
3734 20.6          
3735 20.62          
3736 20.03          
3737 20.06          
3738 20.31          
3739 20.46          
3740 20.56          
3741 20.26          
3742 20.32          
3743 20.7          
3744 20.68          
3745 19.69          
3746 21.03          
3747 20.37          
3748 20.62          
3749 21.41          
3750 20.33          
3751 20.09          
3752 21.32          
3753 20.91          
3754 20.91          
3755 20.51          
3756 20.57          
3757 20.04          
3758 20.71          
3759 20.07          
3760 20.72          
3761 20.97          
3762 20.08          
3763 20.29          
3764 20.34          
3765 20.26          
3766 20.39          
3767 20.73          
3768 20.28          
3769 19.99          
3770 20.86          
3771 20.67          
3772 20.46          
3773 20.37          
3774 20.84          
3775 19.93          
3776 20.38          
3777 20.57          
3778 20.85          
3779 21.04          
3780 20.11          
3781 20.73          
3782 20.81          
3783 20.94          
3784 20.58          
3785 20.51          
3786 20.06          
3787 20.46          
3788 20.81          
3789 20.09          
3790 20.33          
3791 21.03          
3792 19.85          
3793 20.24          
3794 20.12          
3795 20.49          
3796 20.25          
3797 20.62          
3798 20.99          
3799 20.63          
3800 20.52          
3801 20.25          
3802 20.39          
3803 20.34          
3804 20.57          
3805 20.29          
3806 20.68          
3807 21          
3808 20.46          
3809 20.82          
3810 20.41          
3811 21.3          
3812 20.47          
3813 20.61          
3814 20.97          
3815 20.81          
3816 21.11          
3817 19.97          
3818 19.87          
3819 20.08          
3820 20.17          
3821 20.96          
3822 20.63          
3823 20.52          
3824 20.61          
3825 20.26          
3826 20.91          
3827 20.74          
3828 21.06          
3829 19.67          
3830 20.69          
3831 20.65          
3832 20.59          
3833 20.59          
3834 20.47          
3835 20.54          
3836 20.43          
3837 20.5          
3838 20.38          
3839 20.15          
3840 20.65          
3841 20.97          
3842 20.38          
3843 20.71          
3844 21.36          
3845 20.48          
3846 21.12          
3847 20.31          
3848 20.38          
3849 20.61          
3850 20.62          
3851 20.69          
3852 19.83          
3853 20.7          
3854 21.24          
3855 20.55          
3856 20.73          
3857 19.99          
3858 20.86          
3859 20.56          
3860 20.27          
3861 20.35          
3862 20.58          
3863 20.61          
3864 20.38          
3865 21.01          
3866 20.57          
3867 20.65          
3868 21.26          
3869 20.48          
3870 20.53          
3871 20.68          
3872 20.12          
3873 20.38          
3874 20.38          
3875 20.44          
3876 20.43          
3877 20.53          
3878 20.51          
3879 20.74          
3880 20.76          
3881 20.68          
3882 20.18          
3883 20.99          
3884 20.27          
3885 20.59          
3886 20.62          
3887 20.46          
3888 20.6          
3889 20.78          
3890 20.44          
3891 20.53          
3892 20.78          
3893 20.31          
3894 20.41          
3895 20.46          
3896 20.9          
3897 20.57          
3898 20.58          
3899 20.58          
3900 20.2          
3901 20.32          
3902 20.31          
3903 20.37          
3904 20.36          
3905 21.05          
3906 21.03          
3907 20.3          
3908 20.72          
3909 20.43          
3910 20.32          
3911 20.9          
3912 20.99          
3913 19.99          
3914 20.53          
3915 20.5          
3916 20.31          
3917 21.21          
3918 20.61          
3919 20.36          
3920 20.45          
3921 20.82          
3922 20.24          
3923 20.18          
3924 20.58          
3925 20.78          
3926 20.63          
3927 20.99          
3928 20.71          
3929 19.96          
3930 20.72          
3931 20.43          
3932 20.28          
3933 20.63          
3934 20.16          
3935 21.38          
3936 20.72          
3937 20.34          
3938 20.48          
3939 20.92          
3940 20.69          
3941 20.69          
3942 20.95          
3943 20.8          
3944 21.05          
3945 20.84          
3946 20.63          
3947 20.4          
3948 21.19          
3949 20.66          
3950 20.5          
3951 20.66          
3952 20.51          
3953 20.66          
3954 20.67          
3955 20.4          
3956 21.14          
3957 20.48          
3958 19.97          
3959 20.4          
3960 20.67          
3961 20.31          
3962 20.65          
3963 20.04          
3964 20.18          
3965 20.65          
3966 20.27          
3967 20.34          
3968 20.32          
3969 19.72          
3970 20.69          
3971 20.57          
3972 20.31          
3973 20.13          
3974 20.35          
3975 21.5          
3976 20.59          
3977 20.73          
3978 20.51          
3979 20.77          
3980 21.18          
3981 21.2          
3982 20.84          
3983 20.69          
3984 19.99          
3985 20.28          
3986 20.9          
3987 20.53          
3988 20.37          
3989 20.27          
3990 20.55          
3991 20.15          
3992 20.65          
3993 20.53          
3994 20.4          
3995 20.34          
3996 20.7          
3997 20.17          
3998 20.92          
3999 20.16          
4000 20.54          
4001 20.56          
4002 20.96          
4003 20.55          
4004 20.71          
4005 20.88          
4006 21          
4007 20.51          
4008 20.59          
4009 20.53          
4010 20.95          
4011 21.35          
4012 19.99          
4013 20.35          
4014 20.63          
4015 20.31          
4016 21.08          
4017 20.58          
4018 20.09          
4019 19.85          
4020 20.59          
4021 20.16          
4022 20.36          
4023 20.44          
4024 20.66          
4025 20.35          
4026 20.56          
4027 20.54          
4028 20.62          
4029 20.17          
4030 20.35          
4031 20.6          
4032 20.16          
4033 20.26          
4034 20.38          
4035 20.24          
4036 20.34          
4037 20.05          
4038 20.52          
4039 20.31          
4040 20.36          
4041 20.65          
4042 20.65          
4043 20.38          
4044 20.19          
4045 20.32          
4046 20.3          
4047 20.43          
4048 20.69          
4049 20.38          
4050 20.63          
4051 20.58          
4052 19.75          
4053 21.01          
4054 20.99          
4055 20.68          
4056 21.13          
4057 21.08          
4058 20.83          
4059 20.54          
4060 20.22          
4061 20.93          
4062 20.39          
4063 20.36          
4064 20.51          
4065 21.03          
4066 20.53          
4067 20.55          
4068 20.66          
4069 20.17          
4070 20.82          
4071 20.42          
4072 20.52          
4073 20.23          
4074 20.86          
4075 20.69          
4076 20.07          
4077 20.22          
4078 20.33          
4079 20.38          
4080 21.14          
4081 20.87          
4082 20.52          
4083 20.61          
4084 20.47          
4085 21.16          
4086 19.82          
4087 20.18          
4088 20.21          
4089 20.36          
4090 20.8          
4091 20.39          
4092 20.85          
4093 20.33          
4094 20.67          
4095 20.58          
4096 20.35          
4097 20.81          
4098 20.81          
4099 20.86          
4100 20.82          
4101 20.5          
4102 20.4          
4103 20.32          
4104 20.68          
4105 20.55          
4106 21.03          
4107 20.01          
4108 20.39          
4109 20.24          
4110 19.82          
4111 20.36          
4112 19.97          
4113 20.66          
4114 20.34          
4115 19.96          
4116 20.53          
4117 20.9          
4118 20.53          
4119 20.69          
4120 20.21          
4121 21.14          
4122 20.6          
4123 20.33          
4124 19.98          
4125 20.58          
4126 21.19          
4127 21.46          
4128 20.49          
4129 20.96          
4130 20.69          
4131 20.34          
4132 20.8          
4133 20.31          
4134 19.88          
4135 20.72          
4136 20.55          
4137 19.86          
4138 20.19          
4139 20.07          
4140 20.24          
4141 20.62          
4142 19.79          
4143 20.51          
4144 20.31          
4145 20.66          
4146 21.1          
4147 20.32          
4148 20.44          
4149 20.96          
4150 20.35          
4151 20.79          
4152 20.78          
4153 20.26          
4154 19.82          
4155 20.45          
4156 20.16          
4157 20.31          
4158 20.85          
4159 20.83          
4160 21.35          
4161 20.87          
4162 20.35          
4163 20.51          
4164 20.86          
4165 20.14          
4166 20.75          
4167 20.21          
4168 20.33          
4169 20.08          
4170 20.24          
4171 19.83          
4172 20.98          
4173 20.51          
4174 20          
4175 20.42          
4176 20.42          
4177 20.87          
4178 20.58          
4179 20.58          
4180 20.94          
4181 19.91          
4182 20.02          
4183 20.35          
4184 20.21          
4185 20.82          
4186 20.49          
4187 20.22          
4188 20.77          
4189 20.28          
4190 20.93          
4191 21.17          
4192 20.77          
4193 20.75          
4194 20.75          
4195 20.87          
4196 20.59          
4197 20.94          
4198 20.12          
4199 20.13          
4200 20.07          
4201 20.54          
