# Supplementary material for: The role of scaffold reshaping and disassembly in dynamin driven membrane fission
Source: eLife journal article supplement (doi:10.7554/elife.39441), 2018-12-18
Supplement: supp [file elife-39441-supp-v1.zip › elife_poa_e39441_Figure_6_source_data_3.txt]

#  DATA FILE for Fig. 6 in the paper
#
#      "The role of scaffold reshaping and disassembly
#       in dynamin driven membrane fission"
#
#  by Martina Pannuzzo, Zachary A. McDargh, and Markus Deserno
#
#  published in eLife
#
#  -------------------------------------------------------------
#  time evolution of helical scaffold radius
#  -------------------------------------------------------------
#  
#  Column 1: t  (time of simulation, in units of tau)
#  Column 2: R  (radius of dynamin scaffold, in units of sigma)
#
0 17.807503
1 17.807503
2 17.807503
3 17.718808
4 17.64464
5 17.589156
6 17.579751
7 17.818223
8 17.768975
9 17.565459
10 17.384953
11 17.507096
12 17.58189
13 17.669928
14 17.638942
15 17.630809
16 17.720268
17 17.441473
18 17.286012
19 17.28684
20 17.347732
21 17.376085
22 17.456257
23 17.580185
24 17.584215
25 17.671244
26 17.765663
27 17.686253
28 17.605636
29 17.687056
30 17.43496
31 17.410207
32 17.61758
33 17.686082
34 17.729663
35 17.825463
36 17.813947
37 17.921683
38 17.89762
39 18.047691
40 17.937444
41 17.911977
42 17.964735
43 17.900977
44 17.929614
45 17.8841
46 17.844093
47 17.645949
48 17.546003
49 17.603825
50 17.632551
51 17.81137
52 17.845664
53 17.815867
54 17.855194
55 17.832519
56 17.637784
57 17.716904
58 17.71889
59 17.526873
60 17.568005
61 17.548865
62 17.472584
63 17.622687
64 17.618686
65 17.626236
66 17.733979
67 17.778419
68 17.754913
69 17.691098
70 17.726084
71 17.775759
72 17.614852
73 17.740716
74 17.48133
75 17.439397
76 17.610774
77 17.631409
78 17.596349
79 17.525543
80 17.556094
81 17.574233
82 17.633331
83 17.553449
84 17.498952
85 17.495154
86 17.598181
87 17.427828
88 17.66525
89 17.62967
90 17.762265
91 17.730098
92 17.789616
93 17.827107
94 17.804772
95 17.778199
96 17.547052
97 17.493977
98 17.606075
99 17.526315
100 17.740789
101 17.771771
102 17.788964
103 17.609839
104 17.728991
105 17.626466
106 17.530171
107 17.621605
108 17.479651
109 17.601845
110 17.792222
111 17.790622
112 17.849125
113 17.779699
114 17.716597
115 17.682292
116 17.807727
117 17.529068
118 17.366314
119 17.255312
120 17.084681
121 17.354697
122 17.567992
123 17.611296
124 17.599365
125 17.533307
126 17.427706
127 17.390104
128 17.535542
129 17.499968
130 17.56478
131 17.65275
132 17.553741
133 17.586158
134 17.689405
135 17.533207
136 17.645979
137 17.59486
138 17.677593
139 17.622663
140 17.657385
141 17.697651
142 17.905967
143 17.862706
144 17.785768
145 17.706175
146 17.746125
147 17.811154
148 17.789269
149 17.875443
150 17.750216
151 17.860606
152 17.512876
153 17.63494
154 17.608288
155 17.521345
156 17.643029
157 17.604786
158 17.485062
159 17.624361
160 17.836841
161 17.816536
162 17.699479
163 17.723989
164 17.690466
165 17.47393
166 17.524378
167 17.554844
168 17.757835
169 17.59279
170 17.580859
171 17.749525
172 17.742835
173 17.397431
174 17.671731
175 17.372327
176 17.643558
177 17.829271
178 17.722354
179 17.79654
180 17.802008
181 17.834522
182 17.641978
183 17.825819
184 17.790568
185 17.746263
186 17.739238
187 17.702794
188 17.69871
189 17.496483
190 17.291054
191 17.448816
192 17.507773
193 17.552977
194 17.816897
195 17.844767
196 17.73061
197 17.609256
198 17.269452
199 17.400776
200 17.370295
201 17.590221
202 17.413378
203 17.343288
204 17.39277
205 17.463013
206 17.240938
207 17.376123
208 17.172995
209 17.526427
210 17.392904
211 17.533037
212 17.461671
213 17.304055
214 17.517586
215 17.549475
216 17.504409
217 17.685086
218 17.348988
219 17.461337
220 17.476847
221 17.479499
222 17.427035
223 17.364392
224 17.474
225 17.296339
226 17.309199
227 17.302021
228 17.424527
229 17.515962
230 17.542137
231 17.430994
232 17.556887
233 17.62976
234 17.643013
235 17.772523
236 17.67148
237 17.710927
238 17.678364
239 17.659519
240 17.713788
241 17.658992
242 17.411913
243 17.556844
244 17.626227
245 17.608052
246 17.578137
247 17.564808
248 17.537401
249 17.461155
250 17.385697
251 17.556206
252 17.31706
253 17.324994
254 17.402715
255 17.46597
256 17.47651
257 17.335924
258 17.494994
259 17.346118
260 17.556386
261 17.665848
262 17.718539
263 17.333176
264 17.190759
265 17.186966
266 17.596089
267 17.650013
268 17.489477
269 17.489178
270 17.611251
271 17.544827
272 17.511343
273 17.551731
274 17.378806
275 17.492976
276 17.535877
277 17.462964
278 17.322601
279 17.374856
280 17.364127
281 17.245067
282 17.371747
283 17.322941
284 17.338057
285 17.197354
286 17.35663
287 17.622584
288 17.506365
289 17.635411
290 17.659662
291 17.627125
292 17.657732
293 17.617208
294 17.58861
295 17.594633
296 17.594814
297 17.56023
298 17.624403
299 17.504425
300 17.62557
301 17.64089
302 17.033365
303 16.920523
304 16.973479
305 16.930204
306 16.970615
307 17.074271
308 16.991613
309 16.902989
310 16.917618
311 16.908726
312 17.061882
313 16.997396
314 16.859091
315 16.958654
316 17.033837
317 16.976458
318 17.081292
319 17.143615
320 16.907734
321 16.889983
322 17.052545
323 17.05616
324 17.02753
325 16.874397
326 16.97652
327 17.049488
328 17.149056
329 17.110968
330 17.138858
331 16.995332
332 16.942321
333 16.848828
334 16.862223
335 16.800633
336 16.885611
337 16.881448
338 16.866288
339 16.99842
340 16.9574
341 17.018149
342 17.042635
343 17.064389
344 16.936575
345 17.033712
346 17.09627
347 17.050505
348 17.00632
349 16.946561
350 16.936417
351 16.977512
352 16.919404
353 16.866325
354 17.1228
355 17.11655
356 17.026369
357 17.06837
358 17.046766
359 16.942328
360 16.872176
361 16.873185
362 16.910757
363 16.765394
364 16.848282
365 16.841881
366 16.974682
367 17.049262
368 16.93778
369 17.058401
370 16.968791
371 17.209603
372 17.278637
373 17.324768
374 17.148592
375 16.931057
376 16.953182
377 16.889207
378 16.882783
379 16.858135
380 16.802798
381 16.812881
382 16.821462
383 16.921779
384 16.822541
385 16.807366
386 16.853964
387 16.843808
388 16.811917
389 17.026648
390 17.074601
391 17.093941
392 16.995797
393 17.14684
394 17.03131
395 17.070959
396 17.144075
397 17.13089
398 16.974665
399 17.141056
400 17.193696
401 17.219343
402 17.108556
403 17.052955
404 17.130444
405 17.212767
406 17.10157
407 17.105697
408 17.050977
409 16.961571
410 16.958227
411 16.921098
412 16.90822
413 16.743306
414 16.520078
415 16.696649
416 16.734428
417 16.756908
418 16.731458
419 16.947712
420 16.951928
421 16.925653
422 16.949462
423 17.01472
424 16.940153
425 16.89466
426 16.903976
427 16.98621
428 17.214692
429 17.060848
430 17.07991
431 17.055203
432 17.096121
433 17.087637
434 16.935826
435 16.986851
436 16.870469
437 16.852693
438 16.977412
439 16.764467
440 16.872614
441 16.883063
442 17.042435
443 16.867307
444 16.786341
445 16.874781
446 16.900826
447 16.882029
448 17.010021
449 17.031992
450 16.916572
451 16.958151
452 17.013881
453 16.971578
454 17.006385
455 16.963527
456 16.869469
457 16.915127
458 16.89145
459 17.07431
460 17.119
461 16.985436
462 16.981951
463 16.853473
464 16.70914
465 16.74099
466 16.811668
467 16.839502
468 16.973362
469 16.885486
470 16.974256
471 16.934347
472 16.922393
473 16.876515
474 16.820052
475 16.863023
476 16.854638
477 16.871591
478 16.846748
479 16.681826
480 16.828108
481 16.75252
482 16.801925
483 16.735565
484 16.82151
485 16.696846
486 16.540847
487 16.728869
488 16.767024
489 16.668645
490 16.641762
491 16.897818
492 16.66333
493 16.768948
494 16.90527
495 16.794664
496 16.87636
497 16.83128
498 16.790793
499 16.843663
500 16.597588
501 16.618711
502 16.817168
503 16.801946
504 16.696886
505 16.781769
506 16.656753
507 16.633506
508 16.634217
509 16.623692
510 16.759499
511 16.729361
512 16.804216
513 16.730105
514 16.782614
515 16.651539
516 16.853881
517 17.041951
518 16.760365
519 16.914893
520 16.632199
521 17.034093
522 16.935495
523 16.879719
524 16.928923
525 16.992394
526 16.899912
527 16.842122
528 16.991041
529 16.853086
530 16.797983
531 16.668867
532 16.639944
533 16.772918
534 16.866911
535 16.79779
536 16.661097
537 16.44593
538 16.413166
539 16.545011
540 16.889247
541 16.917089
542 16.870916
543 16.885759
544 16.887651
545 16.811205
546 16.991565
547 16.949098
548 16.975316
549 17.021943
550 16.920253
551 16.832236
552 16.925169
553 17.001729
554 17.024884
555 17.084858
556 16.928858
557 16.956028
558 16.862026
559 16.846282
560 16.815859
561 16.824128
562 16.881833
563 16.880258
564 16.776119
565 16.942929
566 16.989768
567 16.912632
568 16.796323
569 16.742731
570 16.735681
571 16.759844
572 16.650721
573 16.687775
574 16.711496
575 16.785982
576 16.723101
577 16.701759
578 16.663078
579 16.708223
580 16.790317
581 16.801808
582 16.666672
583 16.70531
584 16.826823
585 16.614981
586 16.602201
587 16.475937
588 16.517371
589 16.485653
590 16.584953
591 16.684177
592 16.807339
593 16.860235
594 16.768684
595 16.807876
596 16.737728
597 16.739446
598 16.606263
599 16.548118
600 16.670928
601 16.714226
602 16.234694
603 16.192118
604 16.226434
605 16.283117
606 16.242112
607 16.269264
608 16.239228
609 16.208705
610 16.275825
611 16.274853
612 16.307562
613 16.318561
614 16.295445
615 16.194021
616 16.31083
617 16.36899
618 16.33747
619 16.340988
620 16.343013
621 16.324739
622 16.303321
623 16.425094
624 16.350781
625 16.386663
626 16.375054
627 16.090994
628 16.229993
629 16.042086
630 16.123907
631 16.257036
632 16.25961
633 16.2731
634 16.284444
635 16.299413
636 16.243387
637 16.192456
638 16.210682
639 16.180023
640 16.275312
641 16.296789
642 16.328581
643 16.29991
644 16.371681
645 16.316127
646 16.289684
647 16.210998
648 16.036678
649 16.184158
650 16.258864
651 16.232841
652 16.158739
653 16.175293
654 16.173972
655 16.090683
656 16.188607
657 16.238123
658 16.227379
659 16.092134
660 15.989155
661 16.020402
662 16.079821
663 16.010609
664 16.128753
665 16.062961
666 16.19426
667 16.213017
668 16.152335
669 16.155436
670 16.121295
671 16.186538
672 16.30947
673 16.278633
674 16.280628
675 16.404071
676 16.388911
677 16.333201
678 16.365775
679 16.465533
680 16.504546
681 16.497378
682 16.506259
683 16.352261
684 16.208981
685 16.262778
686 16.246049
687 16.163026
688 16.329356
689 16.311754
690 16.306966
691 16.265884
692 16.259087
693 16.131678
694 16.276922
695 16.339624
696 16.282296
697 16.196572
698 16.267364
699 16.140252
700 16.306815
701 16.296925
702 16.415689
703 16.389551
704 16.396379
705 16.386495
706 16.402642
707 16.421753
708 16.416003
709 16.342137
710 16.329299
711 16.232884
712 16.279048
713 16.270228
714 16.28615
715 16.346636
716 16.290679
717 16.318472
718 16.333457
719 16.393139
720 16.198596
721 16.185381
722 16.206709
723 16.292123
724 16.198576
725 16.263453
726 16.209774
727 16.067461
728 16.109211
729 16.081256
730 16.227085
731 16.158774
732 16.202102
733 16.245412
734 16.342245
735 16.353254
736 16.193081
737 16.317256
738 16.355615
739 16.319798
740 16.302551
741 16.257714
742 16.160247
743 16.121574
744 16.152382
745 16.083007
746 16.100688
747 16.025271
748 16.083526
749 16.10128
750 16.192414
751 16.177199
752 16.12864
753 16.244637
754 16.259119
755 16.277513
756 16.356215
757 16.495449
758 16.374566
759 16.333226
760 16.367139
761 16.348504
762 16.278855
763 16.205982
764 16.158561
765 16.156368
766 16.146884
767 16.126297
768 16.192164
769 16.244605
770 16.206532
771 16.224854
772 16.080061
773 16.247342
774 16.151109
775 16.146595
776 16.245848
777 16.232446
778 16.190997
779 16.19058
780 16.175494
781 16.343059
782 16.478786
783 16.471616
784 16.24318
785 16.088478
786 16.039016
787 16.202143
788 16.16505
789 16.002729
790 16.035101
791 16.290463
792 16.353117
793 16.299336
794 16.201719
795 16.171122
796 16.224761
797 16.291201
798 16.364592
799 16.249697
800 16.225719
801 16.152796
802 16.223756
803 16.087236
804 16.078488
805 16.085849
806 16.211668
807 16.351001
808 16.319071
809 16.323629
810 16.456357
811 16.367301
812 16.355042
813 16.198808
814 16.280084
815 16.201577
816 16.314419
817 16.29097
818 16.172762
819 16.162103
820 16.279231
821 16.285589
822 16.348676
823 16.342846
824 16.444337
825 16.392913
826 16.333244
827 16.317911
828 16.337801
829 16.37165
830 16.306913
831 16.377187
832 16.339785
833 16.323705
834 16.314909
835 16.34075
836 16.442434
837 16.312429
838 16.284919
839 16.308684
840 16.493363
841 16.449311
842 16.388077
843 16.32167
844 16.225049
845 16.132826
846 16.255108
847 16.291068
848 16.314683
849 16.464346
850 16.579518
851 16.569322
852 16.462156
853 16.499914
854 16.467403
855 16.445732
856 16.488849
857 16.47917
858 16.485664
859 16.600101
860 16.547476
861 16.470778
862 16.446574
863 16.460434
864 16.220945
865 16.146524
866 16.106718
867 16.110577
868 16.094648
869 16.008036
870 16.000938
871 16.078786
872 16.044773
873 16.056276
874 16.215055
875 16.20487
876 16.186938
877 16.262562
878 16.255883
879 16.388871
880 16.380523
881 16.406598
882 16.427986
883 16.310872
884 16.120799
885 16.220191
886 16.237435
887 16.358667
888 16.373865
889 16.502794
890 16.299047
891 16.256699
892 16.305106
893 16.329988
894 16.374556
895 16.397735
896 16.326227
897 16.392629
898 16.380345
899 16.310872
900 16.238685
901 16.358813
902 15.563094
903 15.360404
904 15.352215
905 15.388457
906 15.335599
907 15.299201
908 15.232007
909 15.212702
910 15.257859
911 15.447578
912 15.580763
913 15.460571
914 15.318193
915 15.309429
916 15.391253
917 15.397492
918 15.447616
919 15.320446
920 15.351129
921 15.397997
922 15.407373
923 15.409831
924 15.397493
925 15.370264
926 15.27761
927 15.265543
928 15.36452
929 15.509353
930 15.502244
931 15.60749
932 15.603844
933 15.534544
934 15.505226
935 15.372074
936 15.27136
937 15.315681
938 15.272801
939 15.332849
940 15.247409
941 15.245902
942 15.246977
943 15.235831
944 15.287699
945 15.298104
946 15.28592
947 15.25082
948 15.414688
949 15.331919
950 15.310662
951 15.280002
952 15.375084
953 15.290779
954 15.375181
955 15.448472
956 15.330302
957 15.251946
958 15.245511
959 15.317411
960 15.333109
961 15.339686
962 15.31184
963 15.261049
964 15.262211
965 15.226518
966 15.238774
967 15.268455
968 15.251278
969 15.368304
970 15.390668
971 15.405602
972 15.355776
973 15.437485
974 15.425979
975 15.511834
976 15.440208
977 15.41098
978 15.345578
979 15.33789
980 15.417313
981 15.408149
982 15.353479
983 15.39298
984 15.385396
985 15.410719
986 15.346726
987 15.330486
988 15.351254
989 15.360849
990 15.272987
991 15.223174
992 15.29241
993 15.310629
994 15.334163
995 15.368236
996 15.385342
997 15.347915
998 15.335984
999 15.287178
1000 15.224427
1001 15.20972
1002 15.319723
1003 15.382897
1004 15.499001
1005 15.465633
1006 15.467778
1007 15.35715
1008 15.26436
1009 15.42215
1010 15.252366
1011 15.215888
1012 15.345006
1013 15.267858
1014 15.270586
1015 15.265674
1016 15.160957
1017 15.260346
1018 15.28652
1019 15.364315
1020 15.420504
1021 15.336597
1022 15.325081
1023 15.338736
1024 15.313489
1025 15.283694
1026 15.200405
1027 15.236175
1028 15.344581
1029 15.309102
1030 15.355469
1031 15.203224
1032 15.289517
1033 15.331941
1034 15.350223
1035 15.399473
1036 15.39874
1037 15.358999
1038 15.445442
1039 15.469277
1040 15.530035
1041 15.513175
1042 15.514567
1043 15.46778
1044 15.545203
1045 15.506055
1046 15.357394
1047 15.39734
1048 15.341661
1049 15.434875
1050 15.29322
1051 15.276335
1052 15.213977
1053 15.326582
1054 15.29955
1055 15.287172
1056 15.332681
1057 15.246097
1058 15.344772
1059 15.190074
1060 15.331292
1061 15.231552
1062 15.288935
1063 15.146969
1064 15.159161
1065 15.201712
1066 15.210002
1067 15.273318
1068 15.175842
1069 15.033328
1070 15.116076
1071 15.174359
1072 15.208365
1073 15.199696
1074 15.196699
1075 15.290143
1076 15.404915
1077 15.429841
1078 15.386779
1079 15.437397
1080 15.484024
1081 15.490054
1082 15.470174
1083 15.528848
1084 15.483261
1085 15.454394
1086 15.537815
1087 15.502463
1088 15.451416
1089 15.443034
1090 15.432758
1091 15.359917
1092 15.432855
1093 15.370367
1094 15.37689
1095 15.337919
1096 15.373648
1097 15.323847
1098 15.398284
1099 15.379965
1100 15.359024
1101 15.331036
1102 15.359112
1103 15.513175
1104 15.504544
1105 15.41292
1106 15.369383
1107 15.386279
1108 15.395022
1109 15.360064
1110 15.438343
1111 15.426229
1112 15.474118
1113 15.438822
1114 15.413717
1115 15.36891
1116 15.370948
1117 15.349985
1118 15.447928
1119 15.449994
1120 15.306499
1121 15.408169
1122 15.424896
1123 15.44333
1124 15.393532
1125 15.301761
1126 15.282427
1127 15.290135
1128 15.254093
1129 15.300213
1130 15.240413
1131 15.177818
1132 15.246286
1133 15.378447
1134 15.39701
1135 15.357469
1136 15.280828
1137 15.26061
1138 15.266719
1139 15.29824
1140 15.341583
1141 15.288699
1142 15.276874
1143 15.403145
1144 15.415075
1145 15.43693
1146 15.554351
1147 15.41701
1148 15.236879
1149 15.212068
1150 15.118493
1151 15.16073
1152 15.302582
1153 15.260791
1154 15.271256
1155 15.342468
1156 15.338092
1157 15.298058
1158 15.327846
1159 15.439649
1160 15.449451
1161 15.433746
1162 15.422272
1163 15.411893
1164 15.396307
1165 15.496381
1166 15.458107
1167 15.556596
1168 15.5389
1169 15.427667
1170 15.464355
1171 15.461052
1172 15.408201
1173 15.372703
1174 15.317403
1175 15.260749
1176 15.280378
1177 15.331921
1178 15.354197
1179 15.342285
1180 15.407175
1181 15.342523
1182 15.212762
1183 15.257758
1184 15.248022
1185 15.34013
1186 15.200049
1187 15.098453
1188 15.084859
1189 15.036304
1190 15.119832
1191 15.220423
1192 15.217616
1193 15.168048
1194 15.265478
1195 15.090274
1196 15.229557
1197 15.338825
1198 15.334158
1199 15.410901
1200 15.446666
1201 15.515551
1202 15.554176
1203 14.46394
1204 14.411301
1205 14.387911
1206 14.38905
1207 14.322502
1208 14.346599
1209 14.336659
1210 14.437409
1211 14.410785
1212 14.38871
1213 14.476254
1214 14.515834
1215 14.548305
1216 14.528585
1217 14.496293
1218 14.616818
1219 14.622846
1220 14.557602
1221 14.539652
1222 14.474484
1223 14.530687
1224 14.470394
1225 14.561153
1226 14.443959
1227 14.384238
1228 14.350555
1229 14.454208
1230 14.485493
1231 14.448492
1232 14.503913
1233 14.44619
1234 14.446196
1235 14.437417
1236 14.335158
1237 14.279715
1238 14.261408
1239 14.258013
1240 14.319366
1241 14.33565
1242 14.316677
1243 14.323364
1244 14.280271
1245 14.389669
1246 14.332565
1247 14.416443
1248 14.475428
1249 14.530748
1250 14.417957
1251 14.455774
1252 14.306388
1253 14.265593
1254 14.256418
1255 14.216757
1256 14.312435
1257 14.411474
1258 14.461391
1259 14.377093
1260 14.401164
1261 14.331484
1262 14.28172
1263 14.268729
1264 14.21876
1265 14.292007
1266 14.308254
1267 14.44
1268 14.413605
1269 14.457903
1270 14.434942
1271 14.373261
1272 14.415091
1273 14.399855
1274 14.252119
1275 14.293685
1276 14.275216
1277 14.348047
1278 14.426764
1279 14.4394
1280 14.398718
1281 14.358139
1282 14.384258
1283 14.40043
1284 14.339556
1285 14.383576
1286 14.42291
1287 14.350908
1288 14.375243
1289 14.361536
1290 14.397754
1291 14.437826
1292 14.434385
1293 14.54787
1294 14.492183
1295 14.489781
1296 14.416482
1297 14.390724
1298 14.531536
1299 14.486193
1300 14.467324
1301 14.486329
1302 14.438548
1303 14.594159
1304 14.59241
1305 14.447626
1306 14.55371
1307 14.546556
1308 14.450965
1309 14.442872
1310 14.311896
1311 14.294229
1312 14.220826
1313 14.241794
1314 14.29296
1315 14.328037
1316 14.293415
1317 14.234362
1318 14.242911
1319 14.246298
1320 14.262031
1321 14.306169
1322 14.296413
1323 14.393044
1324 14.452569
1325 14.525864
1326 14.394642
1327 14.323643
1328 14.336325
1329 14.333943
1330 14.332089
1331 14.482541
1332 14.545389
1333 14.45898
1334 14.332542
1335 14.357215
1336 14.293264
1337 14.291369
1338 14.263397
1339 14.308152
1340 14.380027
1341 14.289878
1342 14.198518
1343 14.128947
1344 14.160054
1345 14.163759
1346 14.194159
1347 14.209445
1348 14.207925
1349 14.261823
1350 14.36781
1351 14.380743
1352 14.44989
1353 14.526632
1354 14.363081
1355 14.308515
1356 14.311592
1357 14.489363
1358 14.510248
1359 14.333461
1360 14.400044
1361 14.434504
1362 14.318442
1363 14.304277
1364 14.285039
1365 14.249491
1366 14.307331
1367 14.272503
1368 14.287732
1369 14.297841
1370 14.346711
1371 14.326546
1372 14.247094
1373 14.287204
1374 14.311149
1375 14.219909
1376 14.304432
1377 14.367188
1378 14.227175
1379 14.258779
1380 14.328034
1381 14.296486
1382 14.198152
1383 14.208755
1384 14.214281
1385 14.210956
1386 14.368321
1387 14.381992
1388 14.407568
1389 14.330106
1390 14.454129
1391 14.352131
1392 14.205993
1393 14.242269
1394 14.31145
1395 14.257787
1396 14.327962
1397 14.405812
1398 14.403297
1399 14.395908
1400 14.407058
1401 14.29523
1402 14.326456
1403 14.331653
1404 14.339015
1405 14.297431
1406 14.27773
1407 14.208775
1408 14.274838
1409 14.267641
1410 14.172858
1411 14.381031
1412 14.44333
1413 14.463812
1414 14.524713
1415 14.505506
1416 14.373538
1417 14.518127
1418 14.556919
1419 14.500204
1420 14.446174
1421 14.371511
1422 14.342508
1423 14.406534
1424 14.377229
1425 14.28799
1426 14.323216
1427 14.324771
1428 14.269554
1429 14.230115
1430 14.261522
1431 14.252502
1432 14.319388
1433 14.388963
1434 14.464616
1435 14.458853
1436 14.503598
1437 14.377947
1438 14.547744
1439 14.547961
1440 14.577223
1441 14.558912
1442 14.4652
1443 14.354586
1444 14.287317
1445 14.343684
1446 14.260071
1447 14.40907
1448 14.299571
1449 14.321373
1450 14.271442
1451 14.49828
1452 14.532984
1453 14.542854
1454 14.491251
1455 14.458801
1456 14.498921
1457 14.51644
1458 14.474896
1459 14.484123
1460 14.415888
1461 14.472467
1462 14.572329
1463 14.590583
1464 14.4473
1465 14.359281
1466 14.365229
1467 14.366454
1468 14.438283
1469 14.562079
1470 14.509663
1471 14.536969
1472 14.513729
1473 14.384558
1474 14.41839
1475 14.33796
1476 14.274156
1477 14.23071
1478 14.345742
1479 14.381951
1480 14.317271
1481 14.465669
1482 14.330006
1483 14.157244
1484 14.158687
1485 14.27319
1486 14.298515
1487 14.406716
1488 14.486642
1489 14.482382
1490 14.51409
1491 14.315426
1492 14.377188
1493 14.312053
1494 14.263665
1495 14.348578
1496 14.350161
1497 14.337343
1498 14.277208
1499 14.280886
1500 14.376701
1501 14.339957
1502 14.437415
1503 13.022537
1504 12.896194
1505 13.070175
1506 13.110417
1507 13.104212
1508 13.102177
1509 13.204951
1510 13.10355
1511 13.135495
1512 13.19489
1513 13.109599
1514 13.18851
1515 13.101621
1516 13.055328
1517 13.188444
1518 13.182632
1519 13.164751
1520 13.07596
1521 12.998281
1522 12.997916
1523 12.840146
1524 13.122644
1525 13.188458
1526 13.218996
1527 13.226589
1528 13.261079
1529 13.276129
1530 13.129841
1531 13.235745
1532 13.183256
1533 13.109576
1534 13.217488
1535 13.185202
1536 13.257121
1537 13.20255
1538 13.2664
1539 13.158857
1540 13.250493
1541 13.179688
1542 13.166443
1543 13.04431
1544 13.024021
1545 13.097792
1546 13.18417
1547 13.122284
1548 13.197389
1549 13.275285
1550 13.156201
1551 13.294901
1552 13.195062
1553 13.164787
1554 13.031526
1555 13.11813
1556 13.084698
1557 13.228349
1558 13.184847
1559 13.218318
1560 13.270349
1561 13.217274
1562 13.176976
1563 13.00292
1564 13.048897
1565 12.998803
1566 12.971005
1567 13.059783
1568 13.006503
1569 13.102359
1570 13.153556
1571 13.157032
1572 13.216512
1573 13.245716
1574 13.275046
1575 13.358879
1576 13.251188
1577 13.124585
1578 13.145833
1579 13.163922
1580 13.168621
1581 13.222196
1582 13.137791
1583 13.177881
1584 13.172252
1585 13.213068
1586 13.250379
1587 13.211181
1588 13.244666
1589 13.187654
1590 13.237369
1591 13.17555
1592 13.239184
1593 13.115424
1594 13.15691
1595 13.141228
1596 13.315342
1597 13.271762
1598 13.223918
1599 13.1015
1600 13.154969
1601 13.194704
1602 13.093
1603 13.240329
1604 13.085518
1605 13.233869
1606 13.214867
1607 13.285995
1608 13.284996
1609 13.284225
1610 13.150362
1611 13.169825
1612 13.184862
1613 13.14073
1614 13.146856
1615 13.186815
1616 13.240403
1617 13.230704
1618 13.388253
1619 13.380772
1620 13.328008
1621 13.27622
1622 13.244641
1623 13.309348
1624 13.310862
1625 13.210574
1626 13.164213
1627 13.176992
1628 13.113538
1629 13.176962
1630 13.15762
1631 13.199906
1632 13.171195
1633 13.189321
1634 13.084356
1635 13.224784
1636 13.249452
1637 13.302044
1638 13.244756
1639 13.182693
1640 13.206221
1641 13.131161
1642 13.124685
1643 13.184515
1644 13.195375
1645 13.217587
1646 13.090278
1647 12.988815
1648 12.978221
1649 13.19752
1650 13.282619
1651 13.145082
1652 13.114831
1653 13.126887
1654 13.191593
1655 13.016534
1656 13.146964
1657 13.268451
1658 13.25761
1659 13.270166
1660 13.170112
1661 13.196364
1662 13.082202
1663 13.172474
1664 13.131714
1665 13.108031
1666 13.090733
1667 13.094919
1668 13.032237
1669 13.170199
1670 13.085264
1671 13.115708
1672 13.132775
1673 13.180489
1674 13.176801
1675 13.120124
1676 13.071122
1677 13.094401
1678 13.119485
1679 13.195438
1680 13.204194
1681 13.144822
1682 13.087808
1683 13.061316
1684 13.06379
1685 13.081389
1686 12.902489
1687 12.939481
1688 12.908218
1689 13.08395
1690 13.133834
1691 13.06523
1692 13.009865
1693 13.063565
1694 13.053014
1695 13.115699
1696 13.217703
1697 13.14229
1698 13.182338
1699 13.06726
1700 13.1649
1701 13.036995
1702 13.077594
1703 12.942635
1704 13.07632
1705 13.089952
1706 13.084367
1707 13.217676
1708 13.122789
1709 13.158861
1710 13.026254
1711 13.129277
1712 13.13211
1713 13.07011
1714 13.134355
1715 13.209909
1716 13.210973
1717 13.171171
1718 13.007274
1719 13.062871
1720 13.083811
1721 13.174239
1722 13.167078
1723 13.109102
1724 13.229409
1725 13.19824
1726 13.070701
1727 13.225847
1728 13.207679
1729 13.198759
1730 13.146407
1731 13.258523
1732 12.964695
1733 13.053467
1734 12.961097
1735 12.959629
1736 12.90504
1737 13.089271
1738 13.020193
1739 13.229759
1740 13.149541
1741 13.124296
1742 13.120504
1743 13.066298
1744 13.108007
1745 13.218143
1746 13.187318
1747 13.072773
1748 13.099156
1749 13.137991
1750 13.211781
1751 13.181734
1752 13.02027
1753 13.166377
1754 13.273868
1755 13.169862
1756 13.170098
1757 13.097822
1758 13.16158
1759 13.165646
1760 13.040154
1761 12.989184
1762 13.196375
1763 13.118261
1764 13.029772
1765 13.154012
1766 13.009972
1767 13.188745
1768 13.143646
1769 13.150856
1770 13.11688
1771 13.233182
1772 13.095741
1773 13.214822
1774 13.100749
1775 13.255783
1776 13.139966
1777 13.16763
1778 13.159596
1779 13.137759
1780 13.09401
1781 13.155681
1782 13.10727
1783 13.048934
1784 13.063092
1785 13.049057
1786 13.090081
1787 13.124108
1788 13.038504
1789 13.148831
1790 13.092312
1791 13.115974
1792 13.159429
1793 13.125739
1794 13.103073
1795 12.969624
1796 12.862574
1797 13.045096
1798 13.129695
1799 13.067416
1800 13.209422
1801 13.168695
1802 13.163916
1803 12.216549
1804 12.112413
1805 12.192639
1806 12.163912
1807 12.112731
1808 12.313745
1809 12.361964
1810 12.29959
1811 12.263507
1812 12.360182
1813 12.281501
1814 12.212939
1815 12.148298
1816 12.218893
1817 12.099857
1818 12.206336
1819 12.239491
1820 12.140678
1821 12.232117
1822 12.187221
1823 12.19577
1824 12.266429
1825 12.227312
1826 12.199668
1827 12.268726
1828 12.197692
1829 12.279321
1830 12.238937
1831 12.249013
1832 12.270242
1833 12.257
1834 12.227203
1835 12.167801
1836 12.146581
1837 12.186219
1838 12.181413
1839 12.163284
1840 12.170436
1841 12.251056
1842 12.30295
1843 12.333435
1844 12.274589
1845 12.230794
1846 12.228573
1847 12.348948
1848 12.337518
1849 12.261777
1850 12.303617
1851 12.272433
1852 12.32933
1853 12.359127
1854 12.297697
1855 12.257353
1856 12.199473
1857 12.06816
1858 12.062734
1859 12.005368
1860 12.187702
1861 12.290691
1862 12.118668
1863 12.157628
1864 12.166868
1865 12.179798
1866 12.195232
1867 12.265263
1868 11.973162
1869 12.224358
1870 12.176527
1871 12.108611
1872 12.138258
1873 12.108927
1874 12.083602
1875 12.2059
1876 12.28019
1877 12.404467
1878 12.163005
1879 12.300554
1880 12.305885
1881 12.225643
1882 12.281578
1883 12.217986
1884 12.317553
1885 12.351815
1886 12.445296
1887 12.290983
1888 12.149315
1889 12.153734
1890 12.126141
1891 12.115535
1892 11.997655
1893 11.956121
1894 12.022065
1895 12.16134
1896 12.152246
1897 12.276262
1898 12.306411
1899 12.327834
1900 12.11523
1901 12.185287
1902 12.128631
1903 12.139369
1904 12.198669
1905 12.202302
1906 12.080478
1907 12.214833
1908 12.218617
1909 12.187415
1910 12.155725
1911 12.130103
1912 12.10223
1913 12.037637
1914 12.132793
1915 12.109149
1916 12.300898
1917 12.255914
1918 12.156663
1919 12.074352
1920 12.234528
1921 12.12711
1922 12.178279
1923 12.18271
1924 12.095485
1925 12.051394
1926 12.061295
1927 11.987902
1928 12.009821
1929 12.146484
1930 12.174651
1931 12.152578
1932 12.208308
1933 12.13442
1934 12.106895
1935 12.124216
1936 12.145815
1937 12.239404
1938 12.150304
1939 12.210204
1940 12.229375
1941 12.171521
1942 12.221585
1943 12.068632
1944 12.178189
1945 12.202311
1946 12.191191
1947 12.152628
1948 12.085019
1949 12.151719
1950 12.191653
1951 12.264434
1952 12.296345
1953 12.160534
1954 12.229785
1955 12.260931
1956 12.312846
1957 12.300259
1958 12.118299
1959 12.183986
1960 12.199594
1961 12.197581
1962 12.370275
1963 12.224577
1964 12.330028
1965 12.293371
1966 12.308514
1967 12.248006
1968 12.25856
1969 12.343761
1970 12.273162
1971 12.276317
1972 12.248885
1973 12.082951
1974 12.273865
1975 12.309796
1976 12.395208
1977 12.243024
1978 12.32953
1979 12.104069
1980 12.028956
1981 12.117403
1982 12.205167
1983 12.082384
1984 12.231103
1985 12.345781
1986 12.384603
1987 12.341428
1988 12.246622
1989 12.253078
1990 12.339413
1991 12.2982
1992 12.255296
1993 12.122018
1994 12.213687
1995 12.162008
1996 12.041905
1997 12.07558
1998 12.113807
1999 12.277086
2000 12.221092
2001 12.265821
2002 12.204139
2003 12.310898
2004 12.264819
2005 12.247822
2006 12.269769
2007 12.188245
2008 12.237572
2009 12.234209
2010 12.265629
2011 12.297203
2012 12.374922
2013 12.357953
2014 12.199431
2015 12.100625
2016 11.994894
2017 12.102331
2018 12.164469
2019 12.198143
2020 12.235842
2021 12.253339
2022 12.266422
2023 12.296222
2024 12.334637
2025 12.242783
2026 12.123335
2027 12.230636
2028 12.364492
2029 12.311791
2030 12.377835
2031 12.247704
2032 12.214824
2033 12.285693
2034 12.200043
2035 12.259259
2036 12.248284
2037 12.203146
2038 12.287387
2039 12.186024
2040 12.203452
2041 12.28729
2042 12.290779
2043 12.297406
2044 12.222826
2045 12.286124
2046 12.335969
2047 12.319751
2048 12.245361
2049 12.272231
2050 12.332496
2051 12.371857
2052 12.365184
2053 12.38483
2054 12.297016
2055 12.375001
2056 12.320566
2057 12.271565
2058 12.247326
2059 12.247007
2060 12.323509
2061 12.311535
2062 12.302245
2063 12.243909
2064 12.163899
2065 12.229777
2066 12.314512
2067 12.324728
2068 12.275025
2069 12.335603
2070 12.33628
2071 12.355847
2072 12.328732
2073 12.193561
2074 12.299569
2075 12.211108
2076 12.257585
2077 12.216929
2078 12.300435
2079 12.312802
2080 12.32657
2081 12.215459
2082 12.160849
2083 12.239556
2084 12.190607
2085 12.164582
2086 12.27748
2087 12.226461
2088 12.231698
2089 12.24704
2090 12.274822
2091 12.36791
2092 12.307918
2093 12.331833
2094 12.237362
2095 12.132316
2096 12.185807
2097 12.207793
2098 12.307273
2099 12.336879
2100 12.290891
2101 12.195481
2102 12.267479
2103 11.330466
2104 11.32767
2105 11.361816
2106 11.377818
2107 11.407171
2108 11.394427
2109 11.450542
2110 11.35953
2111 11.462662
2112 11.441612
2113 11.334818
2114 11.394909
2115 11.287395
2116 11.293473
2117 11.349083
2118 11.40535
2119 11.406178
2120 11.433041
2121 11.478549
2122 11.461007
2123 11.348223
2124 11.384845
2125 11.266851
2126 11.246872
2127 11.215383
2128 11.178205
2129 11.307889
2130 11.276185
2131 11.254773
2132 11.326557
2133 11.376735
2134 11.378402
2135 11.351115
2136 11.376307
2137 11.36552
2138 11.380183
2139 11.335354
2140 11.367751
2141 11.264232
2142 11.408261
2143 11.341632
2144 11.34173
2145 11.473891
2146 11.348716
2147 11.354226
2148 11.363061
2149 11.34013
2150 11.26344
2151 11.329908
2152 11.399452
2153 11.367634
2154 11.335072
2155 11.346711
2156 11.386385
2157 11.382001
2158 11.383061
2159 11.326797
2160 11.332789
2161 11.381738
2162 11.367687
2163 11.336793
2164 11.312145
2165 11.386877
2166 11.466481
2167 11.438545
2168 11.446392
2169 11.462835
2170 11.353546
2171 11.38459
2172 11.464354
2173 11.500088
2174 11.478508
2175 11.537302
2176 11.53745
2177 11.561532
2178 11.490677
2179 11.527458
2180 11.560179
2181 11.431248
2182 11.57904
2183 11.382722
2184 11.433432
2185 11.317151
2186 11.268374
2187 11.241865
2188 11.132843
2189 11.381185
2190 11.323867
2191 11.360056
2192 11.185725
2193 11.203788
2194 11.247956
2195 11.40322
2196 11.337331
2197 11.363555
2198 11.43211
2199 11.430766
2200 11.338354
2201 11.334062
2202 11.321435
2203 11.387981
2204 11.391558
2205 11.425871
2206 11.565321
2207 11.42431
2208 11.388554
2209 11.433109
2210 11.310802
2211 11.365369
2212 11.337513
2213 11.357145
2214 11.358193
2215 11.342112
2216 11.318849
2217 11.305013
2218 11.166251
2219 11.280704
2220 11.329369
2221 11.345224
2222 11.267837
2223 11.383034
2224 11.358339
2225 11.37877
2226 11.410411
2227 11.456874
2228 11.38422
2229 11.364465
2230 11.126793
2231 11.315104
2232 11.298937
2233 11.425333
2234 11.352697
2235 11.448035
2236 11.365841
2237 11.382874
2238 11.393726
2239 11.348613
2240 11.275031
2241 11.353238
2242 11.260123
2243 11.318218
2244 11.348302
2245 11.375225
2246 11.365137
2247 11.306546
2248 11.3479
2249 11.318082
2250 11.418724
2251 11.448563
2252 11.490706
2253 11.549229
2254 11.456818
2255 11.393522
2256 11.379103
2257 11.351913
2258 11.311994
2259 11.37641
2260 11.406631
2261 11.330729
2262 11.302488
2263 11.332888
2264 11.332742
2265 11.244367
2266 11.390307
2267 11.37805
2268 11.346294
2269 11.408984
2270 11.386175
2271 11.347413
2272 11.24832
2273 11.364276
2274 11.430985
2275 11.408055
2276 11.458535
2277 11.465038
2278 11.364441
2279 11.368968
2280 11.420132
2281 11.491351
2282 11.416558
2283 11.456287
2284 11.381064
2285 11.379393
2286 11.404605
2287 11.402662
2288 11.454174
2289 11.492519
2290 11.421687
2291 11.382843
2292 11.301229
2293 11.321583
2294 11.357108
2295 11.403593
2296 11.482814
2297 11.380505
2298 11.412664
2299 11.488657
2300 11.502039
2301 11.374596
2302 11.358936
2303 11.444945
2304 11.422013
2305 11.504143
2306 11.385181
2307 11.644003
2308 11.459651
2309 11.543944
2310 11.358401
2311 11.499425
2312 11.544709
2313 11.580928
2314 11.425013
2315 11.41214
2316 11.294189
2317 11.44273
2318 11.470696
2319 11.494692
2320 11.450159
2321 11.44404
2322 11.361881
2323 11.305298
2324 11.314803
2325 11.362728
2326 11.377948
2327 11.271655
2328 11.307859
2329 11.473591
2330 11.487171
2331 11.482908
2332 11.402555
2333 11.45234
2334 11.434001
2335 11.323749
2336 11.398672
2337 11.390204
2338 11.399382
2339 11.35851
2340 11.304117
2341 11.322791
2342 11.341397
2343 11.319504
2344 11.395494
2345 11.402385
2346 11.465322
2347 11.406372
2348 11.411906
2349 11.368664
2350 11.386309
2351 11.299199
2352 11.366783
2353 11.421695
2354 11.385919
2355 11.458888
2356 11.476245
2357 11.459839
2358 11.440643
2359 11.37954
2360 11.407601
2361 11.247243
2362 11.285276
2363 11.363815
2364 11.31227
2365 11.301222
2366 11.30976
2367 11.336217
2368 11.412444
2369 11.42888
2370 11.371561
2371 11.491797
2372 11.457675
2373 11.46613
2374 11.352755
2375 11.362527
2376 11.491504
2377 11.600581
2378 11.57091
2379 11.565417
2380 11.571858
2381 11.506882
2382 11.490531
2383 11.542441
2384 11.531946
2385 11.50929
2386 11.436698
2387 11.413941
2388 11.361571
2389 11.355248
2390 11.353733
2391 11.391002
2392 11.32409
2393 11.24664
2394 11.403824
2395 11.312353
2396 11.306879
2397 11.311281
2398 11.273297
2399 11.330474
2400 11.317829
2401 11.262852
2402 11.337667
2403 10.815521
2404 10.786437
2405 10.852978
2406 10.839717
2407 10.899225
2408 10.783341
2409 10.841764
2410 10.757588
2411 10.757825
2412 10.850212
2413 10.909495
2414 10.874095
2415 10.833422
2416 10.871042
2417 10.912288
2418 10.848154
2419 10.791106
2420 10.853275
2421 10.873802
2422 10.827606
2423 10.856329
2424 10.832176
2425 10.834716
2426 10.916759
2427 10.838689
2428 10.853054
2429 10.796133
2430 10.87171
2431 10.867446
2432 10.799415
2433 10.980174
2434 10.890478
2435 10.889487
2436 10.862127
2437 10.807089
2438 10.833809
2439 10.790889
2440 10.870643
2441 10.774527
2442 10.846667
2443 10.791286
2444 10.855466
2445 10.875548
2446 10.860866
2447 10.805587
2448 10.851229
2449 10.89029
2450 10.890166
2451 10.830489
2452 10.805292
2453 10.872749
2454 10.905017
2455 10.918177
2456 10.862668
2457 10.85114
2458 10.877295
2459 10.861344
2460 10.831171
2461 10.838356
2462 10.909719
2463 10.83837
2464 10.864718
2465 10.704847
2466 10.863211
2467 10.858504
2468 10.907444
2469 10.779629
2470 10.828937
2471 10.88403
2472 10.837526
2473 10.857223
2474 10.783563
2475 10.769233
2476 10.801878
2477 10.799129
2478 10.873051
2479 10.831319
2480 10.876052
2481 10.948582
2482 10.946786
2483 10.928022
2484 10.93579
2485 10.980315
2486 10.89256
2487 10.837643
2488 10.913568
2489 10.840824
2490 10.820994
2491 10.87895
2492 10.904462
2493 10.802522
2494 10.891083
2495 10.816387
2496 10.73245
2497 10.830923
2498 10.8481
2499 10.76254
2500 10.896407
2501 10.816656
2502 10.77692
2503 10.820382
2504 10.765011
2505 10.795828
2506 10.780535
2507 10.721818
2508 10.773434
2509 10.771095
2510 10.751486
2511 10.773379
2512 10.82462
2513 10.811939
2514 10.795956
2515 10.810878
2516 10.788584
2517 10.849462
2518 10.85272
2519 10.834091
2520 10.831236
2521 10.85915
2522 10.801144
2523 10.829173
2524 10.894105
2525 10.905781
2526 10.860122
2527 10.752928
2528 10.840998
2529 10.895696
2530 10.898818
2531 10.891872
2532 10.877349
2533 10.760754
2534 10.81001
2535 10.783395
2536 10.870947
2537 10.839598
2538 10.812831
2539 10.826672
2540 10.903864
2541 10.91159
2542 10.756368
2543 10.832109
2544 10.898913
2545 10.859585
2546 10.873876
2547 10.858797
2548 10.897045
2549 10.874296
2550 10.869694
2551 10.917759
2552 10.783985
2553 10.91277
2554 10.927249
2555 10.810398
2556 10.815866
2557 10.811554
2558 10.772031
2559 10.806628
2560 10.773749
2561 10.836773
2562 10.818054
2563 10.851332
2564 10.902768
2565 10.893771
2566 10.938537
2567 10.984396
2568 10.983046
2569 10.890614
2570 10.825232
2571 10.835425
2572 10.833957
2573 10.861473
2574 10.838314
2575 10.855899
2576 10.919681
2577 10.861997
2578 10.889799
2579 10.811645
2580 10.844022
2581 10.756234
2582 10.853716
2583 10.858412
2584 10.858275
2585 10.897853
2586 10.862046
2587 10.837261
2588 11.044711
2589 10.995489
2590 10.922972
2591 10.907936
2592 10.860099
2593 10.90754
2594 10.821056
2595 10.789559
2596 10.902317
2597 10.811974
2598 10.840348
2599 10.80613
2600 10.828554
2601 10.788945
2602 10.845489
2603 10.888697
2604 10.784396
2605 10.770791
2606 10.751768
2607 10.78986
2608 10.846265
2609 10.862578
2610 10.883528
2611 10.902559
2612 10.849872
2613 10.941969
2614 10.909113
2615 10.964074
2616 11.004158
2617 10.924947
2618 10.798168
2619 10.960675
2620 10.859543
2621 10.79802
2622 10.901918
2623 10.794292
2624 10.843026
2625 10.829918
2626 10.882482
2627 10.884656
2628 10.900616
2629 10.969513
2630 11.002709
2631 10.877132
2632 10.777264
2633 10.926498
2634 10.858369
2635 10.838719
2636 10.851368
2637 10.843928
2638 10.893234
2639 10.800074
2640 10.858162
2641 10.908375
2642 10.893065
2643 10.923694
2644 10.977477
2645 10.903897
2646 10.981397
2647 10.890841
2648 10.866793
2649 10.842115
2650 10.89966
2651 10.884281
2652 10.935132
2653 10.884329
2654 10.95532
2655 10.89388
2656 10.945938
2657 10.926322
2658 10.924858
2659 10.937595
2660 10.855065
2661 10.836417
2662 10.872414
2663 10.94108
2664 10.837044
2665 10.947698
2666 10.984558
2667 10.96593
2668 10.942767
2669 10.87719
2670 10.941636
2671 10.880859
2672 10.867193
2673 10.815915
2674 10.849525
2675 10.874209
2676 10.947239
2677 10.961069
2678 10.93265
2679 10.828252
2680 10.91353
2681 10.968447
2682 10.828659
2683 10.927249
2684 10.87361
2685 10.797693
2686 10.813132
2687 10.784792
2688 10.715279
2689 10.821279
2690 10.890169
2691 10.781694
2692 10.85183
2693 10.782866
2694 10.782366
2695 10.859195
2696 10.913732
2697 10.92199
2698 10.810404
2699 10.774918
2700 10.914405
2701 10.81643
2702 10.882719
2703 10.34069
2704 10.34069
2705 10.392847
2706 10.345026
2707 10.401282
2708 10.394542
2709 10.409012
2710 10.404871
2711 10.446203
2712 10.366153
2713 10.383918
2714 10.415075
2715 10.313724
2716 10.315568
2717 10.305895
2718 10.451742
2719 10.465108
2720 10.379078
2721 10.427219
2722 10.378242
2723 10.384858
2724 10.410927
2725 10.471193
2726 10.427276
2727 10.433315
2728 10.332394
2729 10.393133
2730 10.383862
2731 10.355717
2732 10.300901
2733 10.399904
2734 10.451871
2735 10.470007
2736 10.415712
2737 10.37487
2738 10.533321
2739 10.468037
2740 10.461996
2741 10.474588
2742 10.559112
2743 10.590423
2744 10.523105
2745 10.501843
2746 10.460823
2747 10.604005
2748 10.457102
2749 10.524155
2750 10.534127
2751 10.527455
2752 10.521822
2753 10.593238
2754 10.442707
2755 10.510694
2756 10.433881
2757 10.495164
2758 10.406664
2759 10.540346
2760 10.542168
2761 10.458676
2762 10.426265
2763 10.522217
2764 10.489652
2765 10.371506
2766 10.390553
2767 10.494463
2768 10.455097
2769 10.391291
2770 10.350965
2771 10.293929
2772 10.275089
2773 10.380627
2774 10.543722
2775 10.545409
2776 10.532991
2777 10.453759
2778 10.484182
2779 10.511696
2780 10.47995
2781 10.483096
2782 10.608523
2783 10.638664
2784 10.587139
2785 10.587826
2786 10.570727
2787 10.580754
2788 10.635422
2789 10.588336
2790 10.588119
2791 10.68506
2792 10.584953
2793 10.538679
2794 10.533305
2795 10.643821
2796 10.671649
2797 10.666374
2798 10.585189
2799 10.578785
2800 10.547973
2801 10.612991
2802 10.555217
2803 10.595616
2804 10.613071
2805 10.621353
2806 10.656056
2807 10.732092
2808 10.576833
2809 10.515517
2810 10.619229
2811 10.587497
2812 10.523344
2813 10.456687
2814 10.573926
2815 10.623426
2816 10.547359
2817 10.590156
2818 10.652674
2819 10.592446
2820 10.509305
2821 10.542905
2822 10.600542
2823 10.614724
2824 10.587638
2825 10.609237
2826 10.588177
2827 10.512957
2828 10.534593
2829 10.548981
2830 10.490382
2831 10.495414
2832 10.509676
2833 10.511771
2834 10.554306
2835 10.534561
2836 10.548084
2837 10.406239
2838 10.466654
2839 10.468967
2840 10.590696
2841 10.620288
2842 10.607999
2843 10.630156
2844 10.632466
2845 10.59266
2846 10.569856
2847 10.718558
2848 10.647209
2849 10.612795
2850 10.678093
2851 10.65071
2852 10.659459
2853 10.697488
2854 10.632758
2855 10.592019
2856 10.615236
2857 10.669765
2858 10.648477
2859 10.674931
2860 10.571348
2861 10.641921
2862 10.668991
2863 10.659413
2864 10.612135
2865 10.557876
2866 10.558391
2867 10.636443
2868 10.600803
2869 10.586156
2870 10.637122
2871 10.591605
2872 10.638653
2873 10.668133
2874 10.684781
2875 10.651702
2876 10.667093
2877 10.723898
2878 10.775546
2879 10.689312
2880 10.672941
2881 10.591267
2882 10.536006
2883 10.647563
2884 10.653535
2885 10.655706
2886 10.667605
2887 10.597464
2888 10.606495
2889 10.571197
2890 10.630228
2891 10.642454
2892 10.698238
2893 10.704199
2894 10.745121
2895 10.672719
2896 10.703016
2897 10.642182
2898 10.65164
2899 10.543668
2900 10.664653
2901 10.699363
2902 10.661826
2903 10.633624
2904 10.633066
2905 10.598234
2906 10.612981
2907 10.716716
2908 10.711618
2909 10.654277
2910 10.691577
2911 10.739609
2912 10.736515
2913 10.632473
2914 10.655055
2915 10.719952
2916 10.638257
2917 10.647316
2918 10.588131
2919 10.633569
2920 10.588876
2921 10.562937
2922 10.609263
2923 10.570071
2924 10.62769
2925 10.631208
2926 10.673396
2927 10.607997
2928 10.601076
2929 10.597463
2930 10.610419
2931 10.630253
2932 10.629934
2933 10.690844
2934 10.665907
2935 10.688916
2936 10.596773
2937 10.653922
2938 10.733846
2939 10.666291
2940 10.689341
2941 10.585993
2942 10.671288
2943 10.654751
2944 10.698917
2945 10.654035
2946 10.631634
2947 10.601712
2948 10.541622
2949 10.579414
2950 10.668698
2951 10.580576
2952 10.545034
2953 10.60379
2954 10.551721
2955 10.656148
2956 10.708296
2957 10.670149
2958 10.674014
2959 10.670467
2960 10.660979
2961 10.765055
2962 10.708716
2963 10.698307
2964 10.676796
2965 10.700948
2966 10.661817
2967 10.708595
2968 10.732512
2969 10.683315
2970 10.687366
2971 10.690681
2972 10.740844
2973 10.748943
2974 10.718578
2975 10.728997
2976 10.746954
2977 10.769295
2978 10.819069
2979 10.793727
2980 10.767292
2981 10.744683
2982 10.731024
2983 10.656768
2984 10.652954
2985 10.615891
2986 10.700399
2987 10.600275
2988 10.70468
2989 10.762083
2990 10.744445
2991 10.678741
2992 10.643041
2993 10.541903
2994 10.533183
2995 10.652141
2996 10.629561
2997 10.651999
2998 10.672837
2999 10.711038
3000 10.722575
3001 10.744149
3002 10.699825
3003 10.735077
3004 9.625242
3005 9.622412
3006 9.704811
3007 9.628693
3008 9.643384
3009 9.60815
3010 9.648414
3011 9.640201
3012 9.667151
3013 9.648772
3014 9.646164
3015 9.623279
3016 9.657064
3017 9.62352
3018 9.620522
3019 9.637644
3020 9.653417
3021 9.49954
3022 9.50508
3023 9.610877
3024 9.566751
3025 9.589503
3026 9.584773
3027 9.549962
3028 9.476886
3029 9.509971
3030 9.553231
3031 9.51649
3032 9.623916
3033 9.632325
3034 9.573247
3035 9.591568
3036 9.573167
3037 9.510832
3038 9.580871
3039 9.481123
3040 9.610566
3041 9.659654
3042 9.463069
3043 9.631744
3044 9.640663
3045 9.626211
3046 9.693296
3047 9.690789
3048 9.653425
3049 9.597303
3050 9.669501
3051 9.557287
3052 9.592179
3053 9.595641
3054 9.616134
3055 9.57184
3056 9.590539
3057 9.612088
3058 9.636024
3059 9.579216
3060 9.66793
3061 9.651103
3062 9.655325
3063 9.650754
3064 9.642459
3065 9.651996
3066 9.690008
3067 9.659822
3068 9.682021
3069 9.746265
3070 9.583522
3071 9.518769
3072 9.647398
3073 9.698859
3074 9.739867
3075 9.728525
3076 9.659479
3077 9.752707
3078 9.649973
3079 9.708176
3080 9.683419
3081 9.690309
3082 9.610237
3083 9.66353
3084 9.668826
3085 9.661995
3086 9.649946
3087 9.69773
3088 9.64449
3089 9.651437
3090 9.705054
3091 9.675136
3092 9.732789
3093 9.780873
3094 9.661526
3095 9.783111
3096 9.680132
3097 9.748251
3098 9.616467
3099 9.663764
3100 9.608123
3101 9.61963
3102 9.621191
3103 9.597769
3104 9.638258
3105 9.703311
3106 9.647177
3107 9.676931
3108 9.610857
3109 9.700105
3110 9.661839
3111 9.671488
3112 9.691107
3113 9.766002
3114 9.665747
3115 9.703656
3116 9.775168
3117 9.669922
3118 9.72649
3119 9.709056
3120 9.755197
3121 9.752811
3122 9.797723
3123 9.712309
3124 9.729883
3125 9.672672
3126 9.705867
3127 9.782941
3128 9.74795
3129 9.72666
3130 9.765519
3131 9.720137
3132 9.751783
3133 9.654214
3134 9.713982
3135 9.72662
3136 9.702262
3137 9.701468
3138 9.601999
3139 9.646625
3140 9.640091
3141 9.68957
3142 9.680696
3143 9.703421
3144 9.737497
3145 9.746532
3146 9.83814
3147 9.742173
3148 9.68589
3149 9.71581
3150 9.786764
3151 9.814344
3152 9.733344
3153 9.811425
3154 9.843785
3155 9.848751
3156 9.843211
3157 9.770203
3158 9.755067
3159 9.737661
3160 9.789812
3161 9.799681
3162 9.646671
3163 9.633459
3164 9.773213
3165 9.774104
3166 9.694186
3167 9.742321
3168 9.715544
3169 9.742141
3170 9.709711
3171 9.73233
3172 9.807016
3173 9.889118
3174 9.7593
3175 9.694398
3176 9.708777
3177 9.743089
3178 9.736592
3179 9.756145
3180 9.827299
3181 9.808935
3182 9.830108
3183 9.761987
3184 9.744192
3185 9.762013
3186 9.723314
3187 9.66736
3188 9.652835
3189 9.686763
3190 9.788977
3191 9.765513
3192 9.79113
3193 9.788066
3194 9.657522
3195 9.731456
3196 9.695641
3197 9.731253
3198 9.739053
3199 9.71628
3200 9.699278
3201 9.734895
3202 9.691185
3203 9.734792
3204 9.799223
3205 9.814109
3206 9.748752
3207 9.792271
3208 9.801911
3209 9.725004
3210 9.77229
3211 9.769365
3212 9.845128
3213 9.756464
3214 9.786717
3215 9.884035
3216 9.865968
3217 9.743485
3218 9.803004
3219 9.767708
3220 9.725065
3221 9.83897
3222 9.821298
3223 9.802834
3224 9.786917
3225 9.798007
3226 9.775368
3227 9.77308
3228 9.808048
3229 9.737586
3230 9.769567
3231 9.749152
3232 9.772545
3233 9.801864
3234 9.805833
3235 9.920819
3236 9.808009
3237 9.814008
3238 9.847437
3239 9.805265
3240 9.811501
3241 9.831329
3242 9.81646
3243 9.788138
3244 9.862302
3245 9.896388
3246 9.913156
3247 9.8615
3248 9.899397
3249 9.834607
3250 9.860011
3251 9.853874
3252 9.869341
3253 9.859517
3254 9.810156
3255 9.872858
3256 9.858618
3257 9.923876
3258 9.935199
3259 9.919005
3260 9.857
3261 9.732385
3262 9.853146
3263 9.87825
3264 9.894685
3265 9.829533
3266 9.861537
3267 9.833183
3268 9.830699
3269 9.816042
3270 9.800905
3271 9.741003
3272 9.753336
3273 9.898852
3274 9.804924
3275 9.877895
3276 9.864523
3277 9.810166
3278 9.810035
3279 9.86598
3280 9.863661
3281 9.891859
3282 9.882643
3283 9.973754
3284 9.825206
3285 9.881602
3286 9.876613
3287 9.866033
3288 9.863378
3289 9.836738
3290 9.84905
3291 9.862453
3292 9.879899
3293 9.878352
3294 9.851239
3295 9.876063
3296 9.943266
3297 9.999848
3298 9.932294
3299 9.983692
3300 9.927063
3301 9.9175
3302 9.81402
3303 9.903712
3304 9.077165
3305 9.099063
3306 9.183217
3307 9.072755
3308 9.034149
3309 9.043928
3310 9.018841
3311 9.045604
3312 9.133784
3313 9.047565
3314 9.001643
3315 9.080599
3316 9.142741
3317 9.113777
3318 9.072458
3319 9.077863
3320 9.126285
3321 9.14623
3322 9.122751
3323 9.053884
3324 9.096588
3325 9.162238
3326 9.055839
3327 9.05996
3328 9.094229
3329 9.0581
3330 9.081877
3331 9.107769
3332 9.090074
3333 9.104471
3334 9.034224
3335 9.100964
3336 9.012392
3337 9.083544
3338 9.126461
3339 9.156242
3340 9.082973
3341 9.024098
3342 9.115075
3343 9.007334
3344 9.015002
3345 9.027634
3346 9.173776
3347 9.096359
3348 9.108249
3349 9.131862
3350 9.061634
3351 9.120668
3352 9.13477
3353 9.142502
3354 9.025236
3355 9.012352
3356 9.064462
3357 9.043549
3358 9.081376
3359 9.110153
3360 9.147224
3361 9.124991
3362 9.033222
3363 9.083164
3364 9.088405
3365 8.988067
3366 9.057466
3367 9.036076
3368 9.023186
3369 9.026651
3370 9.139629
3371 9.101413
3372 9.093274
3373 9.073686
3374 9.071874
3375 9.068611
3376 9.144973
3377 9.061011
3378 9.040471
3379 9.135124
3380 9.184896
3381 9.162443
3382 9.183374
3383 9.118524
3384 9.121637
3385 9.105624
3386 9.16598
3387 9.110858
3388 9.146412
3389 9.108425
3390 9.200126
3391 9.074418
3392 9.128935
3393 9.1502
3394 9.200032
3395 9.129797
3396 9.154199
3397 9.185034
3398 9.15168
3399 9.160019
3400 9.119621
3401 9.257911
3402 9.203555
3403 9.150872
3404 9.180226
3405 9.104989
3406 9.105948
3407 9.162015
3408 9.141794
3409 9.147988
3410 9.247853
3411 9.217153
3412 9.223071
3413 9.152767
3414 9.15166
3415 9.201674
3416 9.134676
3417 9.194209
3418 9.177908
3419 9.167268
3420 9.151265
3421 9.158896
3422 9.243202
3423 9.188099
3424 9.110545
3425 9.087826
3426 9.066462
3427 9.118875
3428 9.18355
3429 9.216438
3430 9.227678
3431 9.167844
3432 9.214532
3433 9.236536
3434 9.244019
3435 9.226339
3436 9.208553
3437 9.25244
3438 9.238647
3439 9.209187
3440 9.210144
3441 9.240346
3442 9.160263
3443 9.231668
3444 9.138174
3445 9.201335
3446 9.223321
3447 9.229561
3448 9.203957
3449 9.205258
3450 9.240256
3451 9.217741
3452 9.278302
3453 9.210626
3454 9.256952
3455 9.21986
3456 9.172696
3457 9.193128
3458 9.190881
3459 9.248664
3460 9.197475
3461 9.111945
3462 9.119165
3463 9.061168
3464 9.171362
3465 9.192259
3466 9.144126
3467 9.115808
3468 9.194404
3469 9.169123
3470 9.178579
3471 9.201679
3472 9.167955
3473 9.191741
3474 9.231886
3475 9.173102
3476 9.181019
3477 9.280002
3478 9.178193
3479 9.267948
3480 9.194655
3481 9.174611
3482 9.169988
3483 9.194068
3484 9.241371
3485 9.261096
3486 9.299621
3487 9.275946
3488 9.270927
3489 9.261936
3490 9.177706
3491 9.178217
3492 9.142223
3493 9.156223
3494 9.156618
3495 9.224598
3496 9.145492
3497 9.164219
3498 9.236575
3499 9.179897
3500 9.225461
3501 9.193425
3502 9.236618
3503 9.214889
3504 9.294806
3505 9.246879
3506 9.212863
3507 9.183906
3508 9.179587
3509 9.121349
3510 9.1528
3511 9.137032
3512 9.114495
3513 9.255757
3514 9.158029
3515 9.197109
3516 9.20651
3517 9.23403
3518 9.198382
3519 9.287394
3520 9.211054
3521 9.189912
3522 9.189435
3523 9.216093
3524 9.234425
3525 9.246538
3526 9.226662
3527 9.235276
3528 9.211597
3529 9.272246
3530 9.195573
3531 9.243561
3532 9.148063
3533 9.215055
3534 9.271022
3535 9.288494
3536 9.339717
3537 9.327173
3538 9.337422
3539 9.264266
3540 9.282599
3541 9.334484
3542 9.342202
3543 9.341145
3544 9.337313
3545 9.395841
3546 9.368078
3547 9.323581
3548 9.310922
3549 9.322837
3550 9.322886
3551 9.222172
3552 9.208474
3553 9.306316
3554 9.407603
3555 9.302782
3556 9.319809
3557 9.307799
3558 9.306819
3559 9.283429
3560 9.29006
3561 9.319784
3562 9.278912
3563 9.356247
3564 9.258068
3565 9.301211
3566 9.223609
3567 9.274391
3568 9.181124
3569 9.277418
3570 9.274294
3571 9.268259
3572 9.355678
3573 9.243398
3574 9.305371
3575 9.287164
3576 9.298144
3577 9.26828
3578 9.320478
3579 9.278975
3580 9.278599
3581 9.217773
3582 9.226298
3583 9.26198
3584 9.294988
3585 9.329146
3586 9.306529
3587 9.249321
3588 9.273888
3589 9.331746
3590 9.297736
3591 9.273998
3592 9.218636
3593 9.321843
3594 9.231422
3595 9.298299
3596 9.333372
3597 9.227402
3598 9.211789
3599 9.277191
3600 9.294775
3601 9.304895
3602 9.258841
3603 9.308732
3604 8.400989
3605 8.310941
3606 8.310878
3607 8.314821
3608 8.275941
3609 8.265842
3610 8.305474
3611 8.318565
3612 8.293285
3613 8.285067
3614 8.311286
3615 8.268767
3616 8.267183
3617 8.262522
3618 8.23804
3619 8.252155
3620 8.28124
3621 8.340722
3622 8.220678
3623 8.266823
3624 8.254751
3625 8.36522
3626 8.288582
3627 8.289685
3628 8.282055
3629 8.300984
3630 8.253381
3631 8.279085
3632 8.33579
3633 8.245418
3634 8.278055
3635 8.212552
3636 8.314319
3637 8.420049
3638 8.359638
3639 8.292105
3640 8.332967
3641 8.321344
3642 8.116027
3643 8.156523
3644 8.162522
3645 8.139148
3646 8.29703
3647 8.335185
3648 8.270432
3649 8.207174
3650 8.243372
3651 8.248695
3652 8.388683
3653 8.260605
3654 8.258267
3655 8.301301
3656 8.281356
3657 8.217657
3658 8.280297
3659 8.334068
3660 8.212755
3661 8.26259
3662 8.357422
3663 8.208463
3664 8.307094
3665 8.257055
3666 8.169345
3667 8.234308
3668 8.184976
3669 8.287005
3670 8.199235
3671 8.303015
3672 8.235545
3673 8.300429
3674 8.299472
3675 8.260237
3676 8.285747
3677 8.250716
3678 8.252075
3679 8.295942
3680 8.314483
3681 8.223673
3682 8.258889
3683 8.237698
3684 8.238662
3685 8.270862
3686 8.162466
3687 8.201336
3688 8.209734
3689 8.388966
3690 8.200677
3691 8.179776
3692 8.266391
3693 8.321084
3694 8.322261
3695 8.33048
3696 8.248912
3697 8.255802
3698 8.316927
3699 8.293638
3700 8.302366
3701 8.199769
3702 8.137784
3703 8.203809
3704 8.157174
3705 8.136782
3706 8.253584
3707 8.288236
3708 8.399903
3709 8.294138
3710 8.327686
3711 8.168106
3712 8.254265
3713 8.211366
3714 8.235219
3715 8.28521
3716 8.197547
3717 8.223732
3718 8.206894
3719 8.235409
3720 8.246389
3721 8.250277
3722 8.34023
3723 8.304984
3724 8.297582
3725 8.240604
3726 8.322671
3727 8.2111
3728 8.260026
3729 8.231206
3730 8.322341
3731 8.351301
3732 8.285802
3733 8.358934
3734 8.333098
3735 8.373592
3736 8.278723
3737 8.366976
3738 8.263179
3739 8.313371
3740 8.266329
3741 8.22683
3742 8.28744
3743 8.266426
3744 8.283853
3745 8.330954
3746 8.326032
3747 8.242287
3748 8.285262
3749 8.310056
3750 8.308256
3751 8.425698
3752 8.288976
3753 8.225283
3754 8.283808
3755 8.243695
3756 8.243267
3757 8.286572
3758 8.309401
3759 8.297182
3760 8.347555
3761 8.310176
3762 8.367721
3763 8.312103
3764 8.263301
3765 8.311617
3766 8.365005
3767 8.287866
3768 8.319342
3769 8.332657
3770 8.303254
3771 8.259283
3772 8.240401
3773 8.290172
3774 8.324702
3775 8.254665
3776 8.25008
3777 8.268982
3778 8.290308
3779 8.228672
3780 8.217907
3781 8.265235
3782 8.360566
3783 8.356241
3784 8.33851
3785 8.230901
3786 8.335499
3787 8.303498
3788 8.292745
3789 8.239583
3790 8.323398
3791 8.299205
3792 8.302118
3793 8.288236
3794 8.261794
3795 8.274594
3796 8.281053
3797 8.321393
3798 8.327354
3799 8.301413
3800 8.288195
3801 8.307402
3802 8.289523
3803 8.25295
3804 8.311913
3805 8.301362
3806 8.299685
3807 8.349723
3808 8.324513
3809 8.203684
3810 8.198882
3811 8.201108
3812 8.243347
3813 8.230347
3814 8.296335
3815 8.207451
3816 8.226073
3817 8.22876
3818 8.211917
3819 8.22067
3820 8.208976
3821 8.186199
3822 8.172762
3823 8.139113
3824 8.218887
3825 8.248866
3826 8.330922
3827 8.285085
3828 8.233838
3829 8.144674
3830 8.203136
3831 8.179224
3832 8.118464
3833 8.084348
3834 8.25
3835 8.295985
3836 8.211368
3837 8.176624
3838 8.158903
3839 8.131396
3840 8.226253
3841 8.132866
3842 8.122771
3843 8.199998
3844 8.069019
3845 8.110477
3846 8.062499
3847 8.068205
3848 7.997986
3849 8.025955
3850 7.961774
3851 7.959229
3852 8.024943
3853 8.124864
3854 8.129038
3855 8.200191
3856 8.168438
3857 8.062732
3858 8.107546
3859 8.090875
3860 8.037471
3861 8.104722
3862 8.128619
3863 8.024909
3864 7.948004
3865 8.047711
3866 8.086918
3867 8.053471
3868 8.023019
3869 8.029602
3870 8.074048
3871 8.093558
3872 7.989011
3873 8.064531
3874 7.991398
3875 8.004887
3876 7.998207
3877 8.071982
3878 8.163853
3879 8.183979
3880 8.008286
3881 8.058317
3882 8.17086
3883 8.074985
3884 8.101126
3885 7.999857
3886 7.952991
3887 7.887295
3888 8.053794
3889 8.068369
3890 8.029595
3891 8.147987
3892 8.115073
3893 8.110669
3894 8.006839
3895 8.017525
3896 8.036302
3897 8.015053
3898 8.194459
3899 8.10015
3900 8.00773
3901 8.116524
3902 8.182712
3903 8.144885
3904 8.200158
3905 7.704218
3906 7.686324
3907 7.711769
3908 7.664879
3909 7.679948
3910 7.735239
3911 7.726435
3912 7.695755
3913 7.701006
3914 7.647623
3915 7.693019
3916 7.67668
3917 7.745238
3918 7.756378
3919 7.688002
3920 7.72387
3921 7.689393
3922 7.686146
3923 7.698363
3924 7.637914
3925 7.624099
3926 7.710072
3927 7.741278
3928 7.694798
3929 7.674511
3930 7.645949
3931 7.674325
3932 7.634083
3933 7.684101
3934 7.757545
3935 7.681652
3936 7.662721
3937 7.709449
3938 7.685698
3939 7.709634
3940 7.703357
3941 7.694943
3942 7.675005
3943 7.723855
3944 7.656216
3945 7.715234
3946 7.704692
3947 7.637741
3948 7.769679
3949 7.645909
3950 7.666359
3951 7.679842
3952 7.763372
3953 7.682331
3954 7.768698
3955 7.76837
3956 7.706369
3957 7.771307
3958 7.668361
3959 7.63799
3960 7.573897
3961 7.710386
3962 7.640757
3963 7.680957
3964 7.682252
3965 7.594225
3966 7.594576
3967 7.670456
3968 7.68209
3969 7.670483
3970 7.633756
3971 7.673291
3972 7.747059
3973 7.722911
3974 7.73062
3975 7.769341
3976 7.760093
3977 7.698156
3978 7.73754
3979 7.627899
3980 7.727344
3981 7.741941
3982 7.634835
3983 7.666359
3984 7.601137
3985 7.700173
3986 7.5886
3987 7.646673
3988 7.715923
3989 7.569617
3990 7.625607
3991 7.668761
3992 7.635308
3993 7.650888
3994 7.670839
3995 7.67552
3996 7.538678
3997 7.716367
3998 7.633597
3999 7.639103
4000 7.618401
4001 7.667966
4002 7.549334
4003 7.696063
4004 7.630978
4005 7.565699
4006 7.53287
4007 7.569376
4008 7.613181
4009 7.58504
4010 7.529825
4011 7.662553
4012 7.52006
4013 7.5607
4014 7.595837
4015 7.514049
4016 7.591399
4017 7.671195
4018 7.604842
4019 7.604048
4020 7.642382
4021 7.5578
4022 7.623734
4023 7.590569
4024 7.661503
4025 7.568545
4026 7.605499
4027 7.604164
4028 7.701485
4029 7.641848
4030 7.526866
4031 7.637503
4032 7.540826
4033 7.501198
4034 7.580242
4035 7.605755
4036 7.615827
4037 7.633295
4038 7.609519
4039 7.705167
4040 7.569765
4041 7.586664
4042 7.658111
4043 7.603836
4044 7.670214
4045 7.638003
4046 7.602147
4047 7.741198
4048 7.681952
4049 7.749866
4050 7.640965
4051 7.604371
4052 7.643239
4053 7.654931
4054 7.704345
4055 7.643452
4056 7.699624
4057 7.630497
4058 7.570456
4059 7.645711
4060 7.716571
4061 7.634725
4062 7.676579
4063 7.629142
4064 7.721052
4065 7.652461
4066 7.682154
4067 7.691876
4068 7.61968
4069 7.632322
4070 7.650418
4071 7.619493
4072 7.641279
4073 7.726158
4074 7.751777
4075 7.658643
4076 7.680634
4077 7.620773
4078 7.668816
4079 7.716524
4080 7.645187
4081 7.693827
4082 7.649089
4083 7.588773
4084 7.575746
4085 7.63398
4086 7.606636
4087 7.639417
4088 7.614157
4089 7.655238
4090 7.588436
4091 7.514703
4092 7.64358
4093 7.652247
4094 7.569774
4095 7.622104
4096 7.633906
4097 7.695385
4098 7.597311
4099 7.699628
4100 7.700193
4101 7.650469
4102 7.573148
4103 7.634974
4104 7.665163
4105 7.66568
4106 7.57708
4107 7.643808
4108 7.621199
4109 7.583159
4110 7.585342
4111 7.666916
4112 7.652335
4113 7.55017
4114 7.618342
4115 7.699028
4116 7.678204
4117 7.654393
4118 7.66444
4119 7.608213
4120 7.584612
4121 7.589505
4122 7.551758
4123 7.582555
4124 7.645421
4125 7.666409
4126 7.61005
4127 7.650458
4128 7.679347
4129 7.679121
4130 7.65823
4131 7.681265
4132 7.636419
4133 7.639685
4134 7.652458
4135 7.608884
4136 7.660593
4137 7.683041
4138 7.686536
4139 7.599244
4140 7.577131
4141 7.58777
4142 7.650903
4143 7.699812
4144 7.688815
4145 7.65628
4146 7.584719
4147 7.572464
4148 7.626483
4149 7.606318
4150 7.647001
4151 7.604332
4152 7.549076
4153 7.554749
4154 7.597926
4155 7.584579
4156 7.645732
4157 7.619173
4158 7.617117
4159 7.629475
4160 7.681905
4161 7.62809
4162 7.681332
4163 7.567748
4164 7.609795
4165 7.560967
4166 7.582604
4167 7.556408
4168 7.661133
4169 7.597106
4170 7.658699
4171 7.635265
4172 7.620501
4173 7.603884
4174 7.587721
4175 7.599416
4176 7.635532
4177 7.599074
4178 7.600584
4179 7.651257
4180 7.624176
4181 7.597201
4182 7.669449
4183 7.616019
4184 7.601632
4185 7.598279
4186 7.587563
4187 7.624333
4188 7.654556
4189 7.597187
4190 7.628749
4191 7.643792
4192 7.583097
4193 7.555177
4194 7.561083
4195 7.622104
4196 7.533107
4197 7.566719
4198 7.489465
4199 7.495266
4200 7.487872
4201 7.60456
4202 7.568405
4203 7.636894
4204 7.505319
4205 7.562413
