# Supplementary figures and images for: The role of scaffold reshaping and disassembly in dynamin driven membrane fission
Source: eLife journal article supplement (doi:10.7554/elife.39441), 2018-12-18

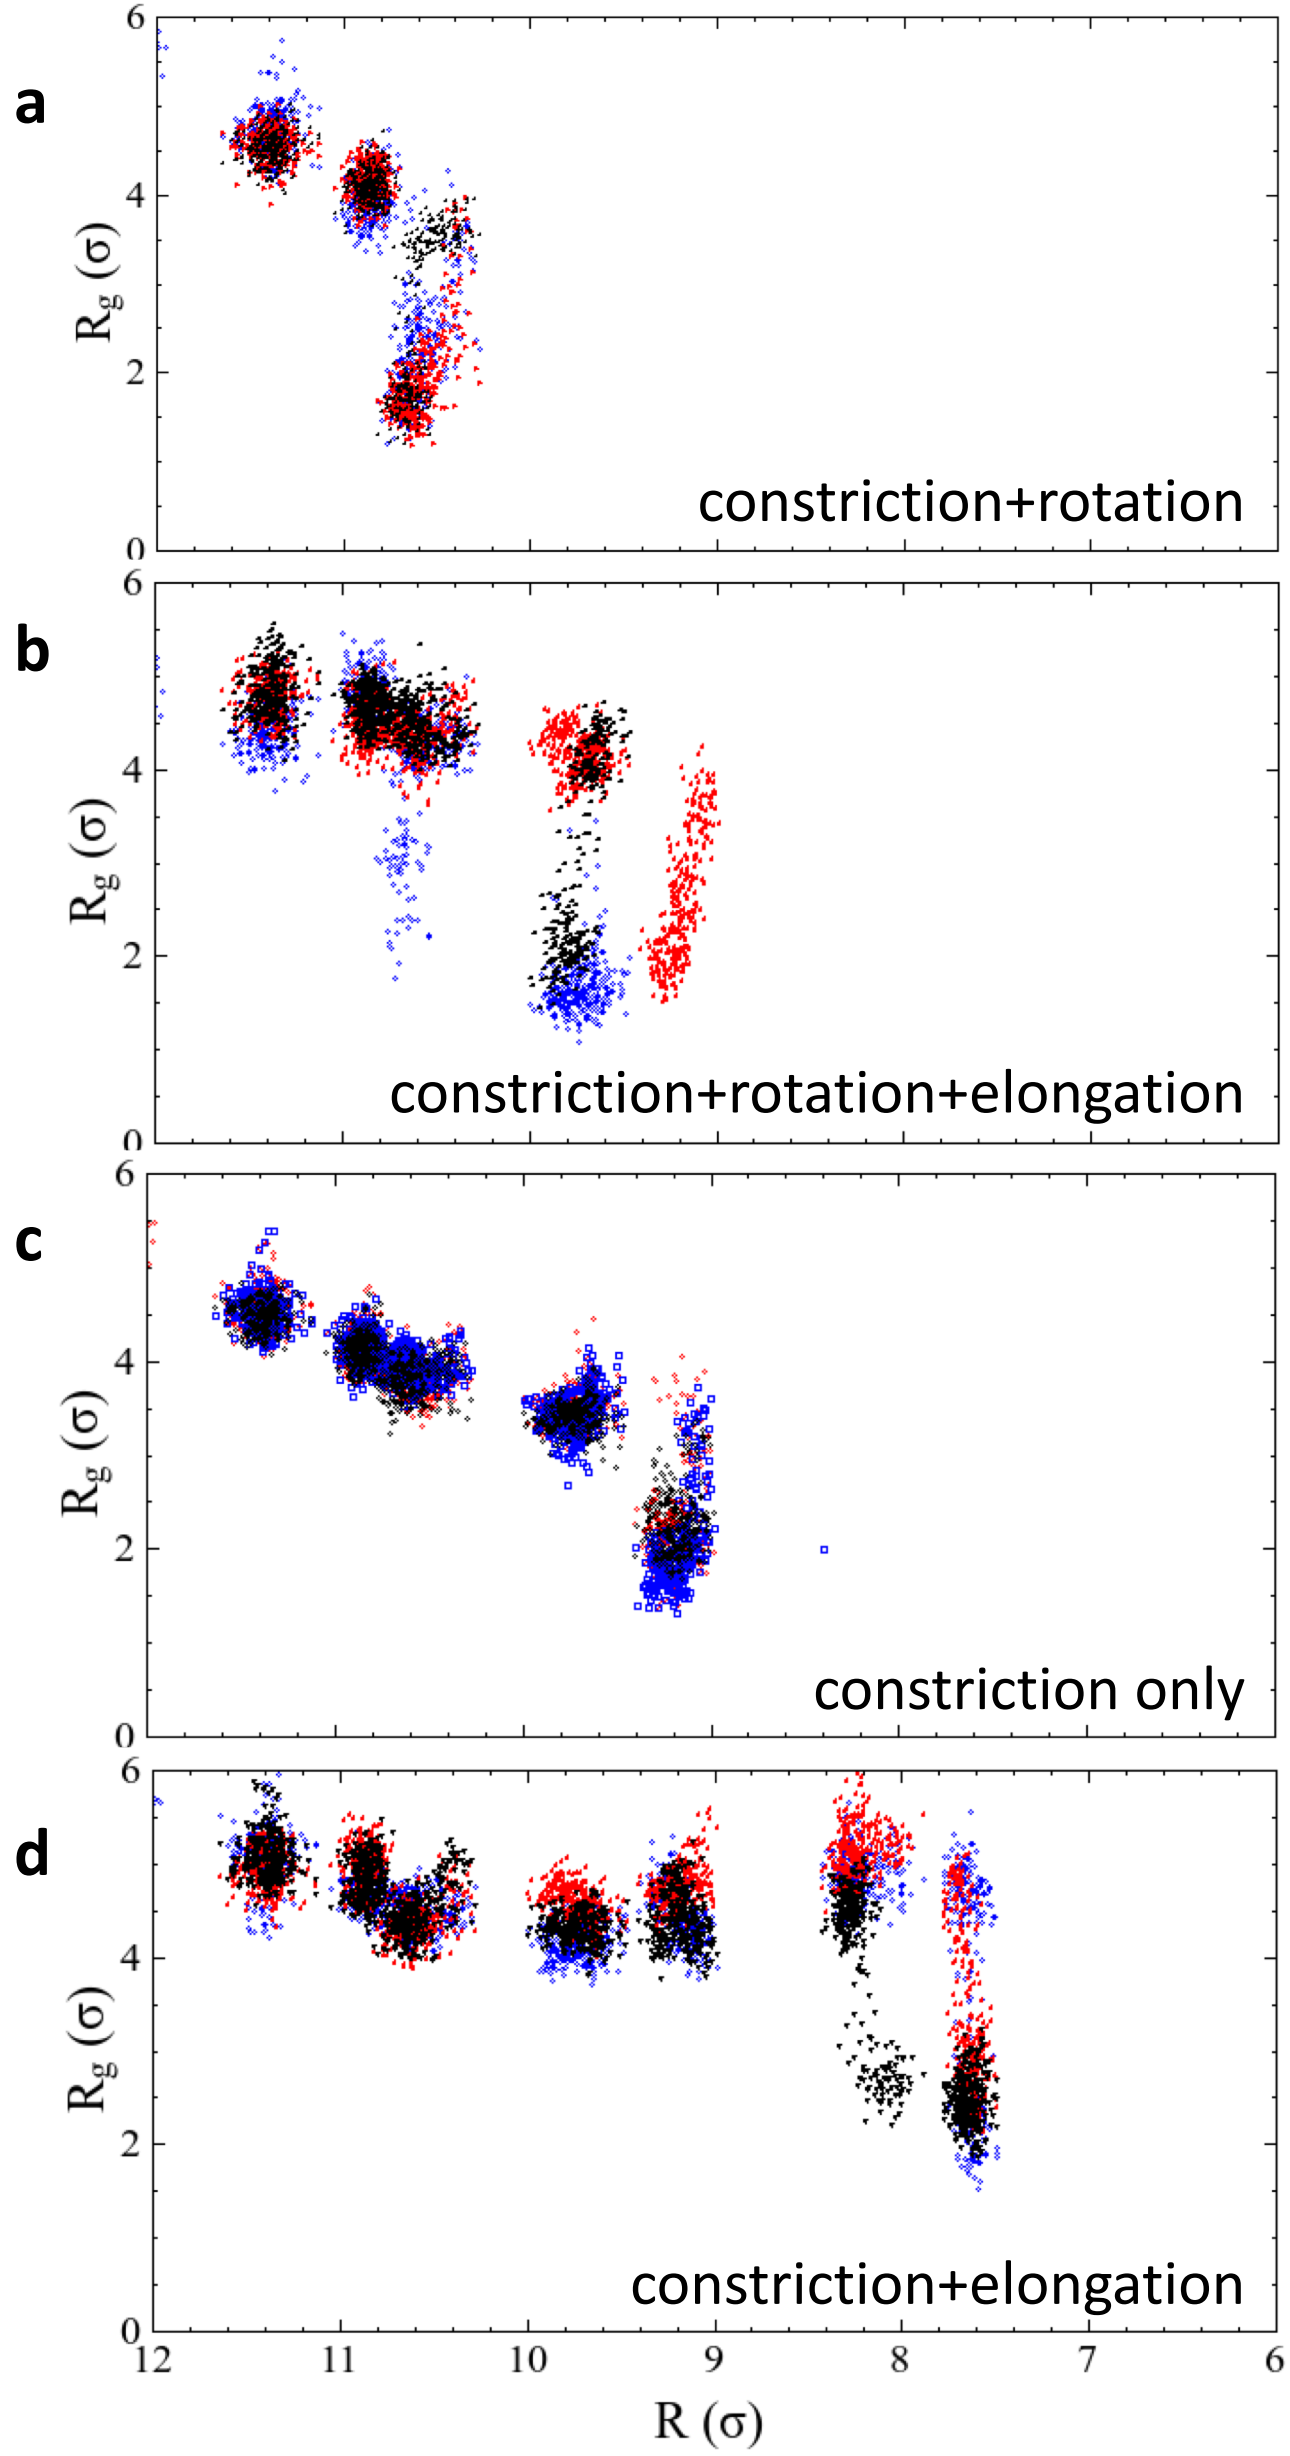

Supplement: supp [file elife-39441-supp-v1.zip › elife_poa_e39441_Figure_2_figure_supplement_1.pdf]
